# Supplementary material for: Iridium-catalyzed chemoselective asymmetric hydrogenation of conjugated enones with ferrocene-based multidentate phosphine ligands
Source: Royal Society of Chemistry journal article supplement (doi:10.1039/d2cc01583h), 2022-01-01
Supplement: d2cc01583h1.pdf [file d2cc01583h1.pdf]

*Supporting Information*

**Iridium-Catalyzed Chemoselective Asymmetric Hydrogenation of Conjugated  
Enones with Ferrocene-Based Multidentate Phosphine Ligands**

Jinming Ma, Wendian Li, Lin He, Hui Lv

**Table of contents**

|                                                                 |      |
|-----------------------------------------------------------------|------|
| I. General remark .....                                         | S2   |
| II. Preparation of ligands .....                                | S2   |
| III. Preparation substrates .....                               | S12  |
| IV. Gram-scale reaction and transformations of products.....    | S24  |
| V. NMR spectra of ligands and hydrogenation products .....      | S27  |
| VI. HPLC charts for hydrogenation products and derivatives..... | S83  |
| VII. Reference.....                                             | S157 |

## I. General remark

All reactions and manipulations which are sensitive to moisture or air were performed in an argon-filled glovebox or using standard schlenk techniques. Hydrogen gas (99.999%) was purchased from Shanghai Regulator Factory Co., Ltd. Anhydrous MeOH, EtOH, *i*-PrOH, DCM, 1,4-dioxane, *n*-hexane and [Ir(COD)Cl]<sub>2</sub> were purchased from J&K. Anhydrous THF, Et<sub>2</sub>O were distilled from sodium benzophenoneketyl. Solvents were transferred by syringe. Melting point (m.p.) was determined by RY-1 Melting Point Apparatus. <sup>1</sup>H NMR (400 MHz), <sup>13</sup>C NMR (101 MHz) and <sup>31</sup>P NMR (162 MHz) spectra were recorded on a Bruker ADVANCE III spectrometer with CDCl<sub>3</sub> as the solvent and tetramethylsilane (TMS) as the internal standard. Chemical shifts are reported upfield to TMS (0.00 ppm) for <sup>1</sup>H NMR and relative to CDCl<sub>3</sub> (77.0 ppm) for <sup>13</sup>C NMR. HRMS were recorded on APEXII and ZAB-HS spectrometer. HPLC analyses were performed using an Agilent 1260 Series instrument. Column Chromatography was performed with silica gel Merck 60 (300 - 400 mesh).

## II. Preparation of ferrocene-based tetradentate phosphine ligands

### Procedure for the synthesis of compound 1<sup>1</sup>

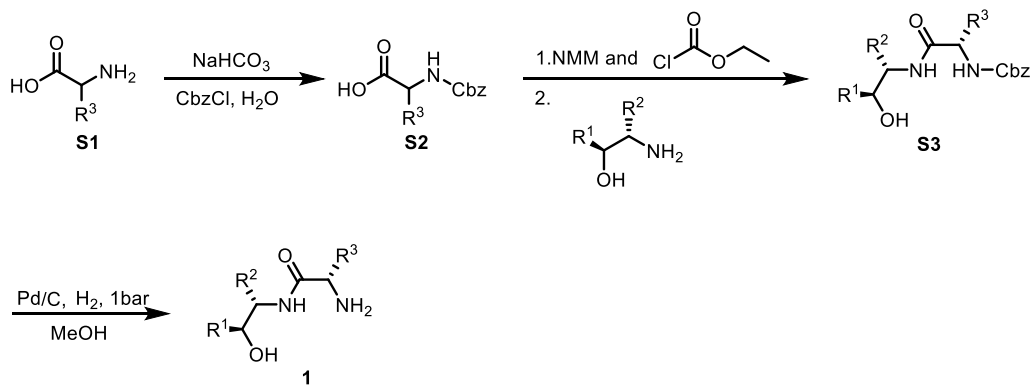

For the preparation of **S2**: In a 250 mL reaction flask, add sodium bicarbonate (15.00 mmol, 1.50 eq.), 60 mL water, add amino acid **S1** (10.00 mmol, 1.00 eq.) under ice bath stirring, then add benzyl chloroformate (11.00 mmol, 1.10 eq.) dropwise, and slowly increase after the addition. Stir for 4h after reaching room temperature. The residue is in an ice bath, adjusted to

pH=1 with hydrochloric acid, stirred for 15 minutes, filtered to obtain a white solid, dried in a vacuum drying oven to remove water, get white solid **S2**, the yield is 90% - 94%.

**S2** (4.78 mmol, 1.00 eq.) was taken in DCM (40 mL) and a few drops of MeOH was added to dissolve the amino acid completely. The solution was cooled in an ice bath and N-methylmorpholine (5.23 mmol, 1.20 eq.) and ethyl chloroformate (5.23 mmol, 1.20 eq.) were added consecutively and stirred at 0 °C for 1 h. Glycinol (5.23 mmol, 1.2 eq., dissolved in 8 mL of DCM) was then added dropwise and the reaction mixture gradually warmed to room temperature. After stirring for 10 h, the reaction mixture was washed with 1 M hydrochloric acid. Combined organics were dried over anhydrous Na<sub>2</sub>SO<sub>4</sub>, filtered, concentrated and purified by flash chromatography to give the product **S3** as a white solid in 50% - 72% yield.

To a solution of **S3** (2.00 mmol) in 30 mL of anhydrous MeOH, 0.10 g of 10% palladium on activated charcoal was added and the flask purged with hydrogen gas five times. The reaction mixture was then allowed to stir at room temperature under an atmosphere of hydrogen. After 5 h, the mixture was filtered through a pad of celite and washed with MeOH. After concentrating the filtrate, product **1** was obtained as a solid in near quantitative yield.

### Procedure for the synthesis of compound **2**<sup>2</sup>

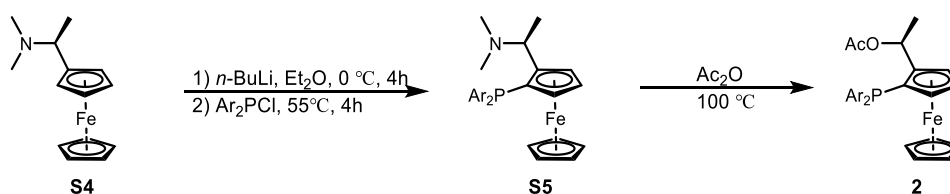

To a solution of (S)-Ugi's amine **S4** (10.00 mmol, 1.00 eq.) in anhydrous Et<sub>2</sub>O (20 mL) was added 2.4 M *n*-BuLi solution in *n*-hexane (11.20 mmol, 1.12 eq.) at 0 °C. After addition was completed, the mixture was warmed to room temperature and stirred for 4 h. The mixture was then 55 °C, Then Ar<sub>2</sub>PCl (12 mmol, 1.20 eq.) was added dropwise to the reaction solution under reflux, and the reflux was continued for about 4 h, monitored by TLC. After the reaction was completed, it was quenched by adding water, and the organic phase was extracted with ether. The organic phase was extracted with anhydrous Na<sub>2</sub>SO<sub>4</sub>. Filter and dry to obtain a red oily liquid and recrystallize with a certain amount of EtOH to obtain the product **S5** (Ar = Ph,

60% yield; Ar = 3,5-(*t*-Bu)<sub>2</sub>C<sub>6</sub>H<sub>3</sub>, 55% yield).

A solution of aminophosphine **S5** (1.00 mmol) in acetic anhydride (2 mL) was heated to 90 - 100 °C (Ar = Ph, 100 °C; Ar = 3,5-(*t*-Bu)<sub>2</sub>C<sub>6</sub>H<sub>3</sub>, 90 °C) for 1 - 2 h (monitored by TLC). After the starting material disappeared, the volatiles were removed in vacuo and then toluene (2 mL) was added, concentrated. The operation was repeated three times to remove excess acetic anhydride. To the residue, a small amount of anhydrous MeOH was added and then the solvent was removed by high vacuum, the obtained yellow solid (> 95% yield) was pure enough for next step.

### Procedure for the synthesis of L1 - L7 and L9 - L12

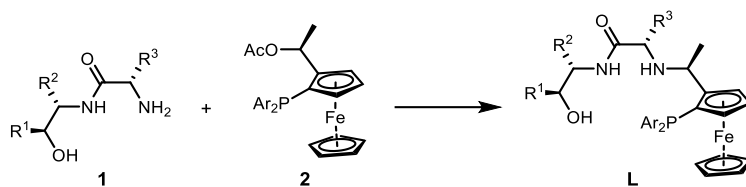

A mixture of compound **2** (0.50 mmol, 1.0 eq.), amino acid **1** (1.00 mmol, 2.0 eq.) and in dry Acetonitrile (2 mL) was stirred for 10 min at room temperature under nitrogen. If the solubility is not good, a few drops of MeOH was added to dissolve the amino acid **1** completely. Then the mixture was heated at 100 °C overnight. The solvent was evaporated in vacuum to afford the crude product. After chromatography on basic alumina column with DCM/MeOH (100:1 to 50:1) as eluent, the corresponding ligands were obtained as orange solids **L** in 35% - 92% yields.

### Procedure for the synthesis of L8<sup>3</sup>

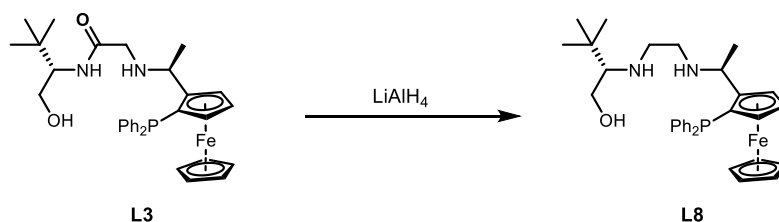

To a suspension of LiAlH<sub>4</sub> (2.60 mmol, 2.00 eq.) in Et<sub>2</sub>O (5 mL) was added compound **L3** (1.30 mmol, 1.00 eq.). The mixture was stirred at 70 °C for 3 h. The reaction was quenched with H<sub>2</sub>O (1 mL), dried over Na<sub>2</sub>SO<sub>4</sub>, filtered, concentrated and purified by flash chromatography to give the product as a yellow solid **L8** in 65% yield.

### Procedure for the synthesis of L10

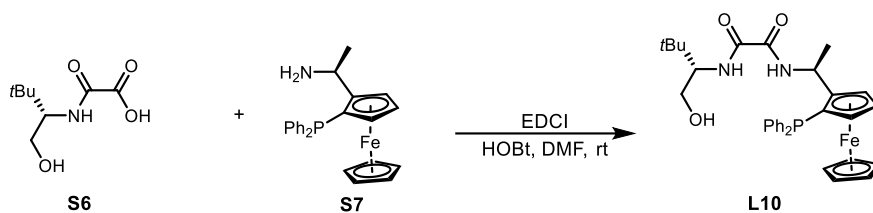

At 0 °C, **S6** (1.00 mmol, 1.00 eq.) was added in DCM (10 ml), EDCI(1.20 mmol, 1.20 eq.) and HOBT (1.50 mmol, 1.50 eq.) were added and stirred for 1 hour, then DIEA(1.50 mmol, 1.50 eq.) was added, **S7**(1.00 mmol, 1.00 eq.) was added, stirred at room temperature overnight. The reaction was quenched with H<sub>2</sub>O (3 mL), dried over Na<sub>2</sub>SO<sub>4</sub>, filtered, concentrated and purified by flash chromatography to give the product as a yellow solid **L10** in 40% yield.

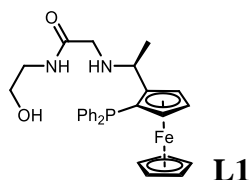

Yellow solid, 344.6 mg, 67% yield. m.p. 44 - 48 °C,  $[\alpha]_{\text{D}}^{25} = +299$  (c = 0.1, CH<sub>2</sub>Cl<sub>2</sub>); <sup>1</sup>H NMR (400 MHz, Chloroform-*d*)  $\delta$  7.57 - 7.50 (m, 2H), 7.41 - 7.36 (m, 3H), 7.26 - 7.18 (m, 5H), 4.47 - 4.42 (m, 1H), 4.35 - 4.30 (m, 1H), 4.17 - 4.11 (m, 1H), 3.97 (s, 5H), 3.88 - 3.84 (m, 1H), 3.55 - 3.46 (m, 2H), 3.10 - 3.01 (m, 4H), 1.43 (d,  $J = 6.6$  Hz, 3H). <sup>13</sup>C NMR (101 MHz, Chloroform-*d*)  $\delta$  174.2, 140.6 (d,  $J = 9.4$  Hz), 137.1, 135.1 (d,  $J = 21.3$  Hz), 132.4 (d,  $J = 17.8$  Hz), 129.3, 128.4 (d,  $J = 5.8$  Hz), 128.3, 128.2, 96.6 (d,  $J = 24.2$  Hz), 74.9, 71.8 (d,  $J = 4.6$  Hz), 69.7, 69.3, 69.2, 63.2, 51.9 (d,  $J = 8.1$  Hz), 49.1, 42.5, 18.9. <sup>31</sup>P NMR (162 MHz, Chloroform-*d*)  $\delta$  -24.20. HRMS(ESI) calcd. for C<sub>28</sub>H<sub>32</sub>FeN<sub>2</sub>O<sub>2</sub>P[M+H]<sup>+</sup>: 515.1545, found: 515.1548

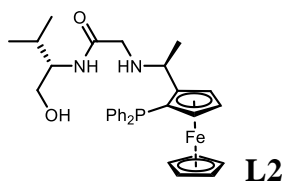

Yellow solid, 283.8 mg, 51% yield, m.p. 46 - 52 °C,  $[\alpha]_{\text{D}}^{25} = +240$  (c = 0.1, CH<sub>2</sub>Cl<sub>2</sub>); <sup>1</sup>H NMR (400 MHz, Chloroform-*d*)  $\delta$  7.57 - 7.49 (m, 2H), 7.44 - 7.35 (m, 4H), 7.27 - 7.18 (m,

4H), 4.47 - 4.41 (m, 1H), 4.35 - 4.29 (m, 1H), 4.22 - 4.14 (m, 1H), 3.99 (s, 5H), 3.86 - 3.80 (m, 1H), 3.65 - 3.58 (m, 1H), 3.54 - 3.40 (m, 2H), 2.89 (dd, 2H), 1.88 - 1.78 (m, 1H), 1.40 (d,  $J = 6.7$  Hz, 3H), 0.90 (d,  $J = 6.8$  Hz, 3H), 0.86 (d,  $J = 6.8$  Hz, 3H).  $^{13}\text{C}$  NMR (101 MHz, Chloroform-*d*)  $\delta$  173.8, 140.0 (d,  $J = 9.5$  Hz), 136.9 (d,  $J = 8.4$  Hz), 134.9 (d,  $J = 21.1$  Hz), 132.5 (d,  $J = 18.5$  Hz), 129.3, 128.5 (d,  $J = 2.2$  Hz), 128.4, 128.2 (d,  $J = 8.0$  Hz), 96.5 (d,  $J = 23.7$  Hz), 75.2 (d,  $J = 7.9$  Hz), 71.7 (d,  $J = 4.2$  Hz), 69.7, 69.5 (d,  $J = 4.2$  Hz), 69.2, 64.6, 57.9, 51.6 (d,  $J = 8.2$  Hz), 48.5, 28.8, 19.5, 19.1, 19.0.  $^{31}\text{P}$  NMR (162 MHz, Chloroform-*d*)  $\delta$  -24.72. HRMS(ESI) calcd. for  $\text{C}_{31}\text{H}_{38}\text{O}_2\text{N}_2\text{FeP}[\text{M}+\text{H}]^+$ : 557.2015, found: 557.2020.

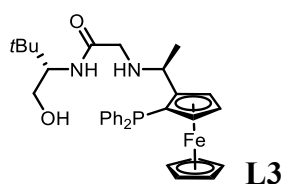

Yellow solid, 399.3 mg, 70% yield. m.p. 65 - 72 °C,  $[\alpha]_{\text{D}}^{25} = +237$  ( $c = 0.1$ ,  $\text{CH}_2\text{Cl}_2$ );  $^1\text{H}$  NMR (400 MHz, Chloroform-*d*)  $\delta$  7.58 - 7.45 (m, 3H), 7.43 - 7.33 (m, 3H), 7.31 - 7.17 (m, 4H), 4.47 - 4.41 (m, 1H), 4.35 - 4.28 (m, 1H), 4.24 - 4.15 (m, 1H), 4.00 (s, 5H), 3.85 - 3.79 (m, 1H), 3.81 - 3.73 (m, 1H), 3.70 - 3.59 (m, 1H), 3.45 - 3.31 (m, 1H), 2.95 (d,  $J = 17.5$  Hz, 1H), 2.76 (d,  $J = 17.5$  Hz, 1H), 1.41 (d,  $J = 6.7$  Hz, 3H), 0.91 (s, 9H).  $^{13}\text{C}$  NMR (101 MHz, Chloroform-*d*)  $\delta$  173.9, 139.7 (d,  $J = 9.5$  Hz), 136.7 (d,  $J = 8.7$  Hz), 134.7 (d,  $J = 20.9$  Hz), 132.5 (d,  $J = 18.9$  Hz), 129.2, 128.6, 128.4 (d,  $J = 6.4$  Hz), 128.1 (d,  $J = 7.6$  Hz), 96.2 (d,  $J = 23.6$  Hz), 75.1 (d,  $J = 7.8$  Hz), 71.5 (d,  $J = 4.2$  Hz), 69.6, 69.5 (d,  $J = 4.2$  Hz), 69.1, 63.5, 60.1, 51.4 (d,  $J = 8.5$  Hz), 48.0, 33.3, 26.9, 19.2.  $^{31}\text{P}$  NMR (162 MHz, Chloroform-*d*)  $\delta$  -25.08; HRMS(ESI) calcd. for  $\text{C}_{32}\text{H}_{40}\text{FeN}_2\text{O}_2\text{P}[\text{M}+\text{H}]^+$ : 571.2171, found: 571.2174

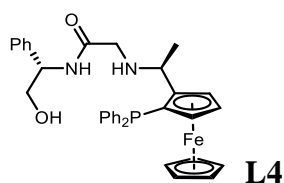

Yellow solid, 395.6 mg, 67% yield, m.p. 70 - 74 °C,  $[\alpha]_{\text{D}}^{25} = +207$  ( $c = 0.1$ ,  $\text{CH}_2\text{Cl}_2$ );  $^1\text{H}$  NMR (400 MHz, Chloroform-*d*)  $\delta$  7.85 (d,  $J = 7.2$  Hz, 1H), 7.56 - 7.46 (m, 2H), 7.41 - 7.27

(m, 6H), 7.28 - 7.17 (m, 6H), 4.95 - 4.87 (m, 1H), 4.44 - 4.39 (m, 1H), 4.33 - 4.28 (m, 1H), 4.21 - 4.11 (m, 1H), 3.99 (s, 5H), 3.84 - 3.79 (m, 1H), 3.76 (d,  $J = 5.7$  Hz, 2H), 3.19 - 2.52 (m, 2H), 1.35 (d,  $J = 6.7$  Hz, 3H).  $^{13}\text{C}$  NMR (101 MHz, Chloroform-*d*)  $\delta$  173.4, 139.9 (d,  $J = 9.4$  Hz), 138.9, 136.8 (d,  $J = 8.6$  Hz), 134.8 (d,  $J = 20.9$  Hz), 132.6 (d,  $J = 18.7$  Hz), 129.3, 128.8, 128.6 (d,  $J = 6.9$  Hz), 128.5, 128.2 (d,  $J = 7.8$  Hz), 127.9, 126.9, 96.3 (d,  $J = 23.6$  Hz), 75.2 (d,  $J = 7.5$  Hz), 71.7 (d,  $J = 4.4$  Hz), 69.7, 69.6 (d,  $J = 4.3$  Hz), 69.2, 67.1, 56.4, 51.6 (d,  $J = 8.1$  Hz), 48.5, 19.0.  $^{31}\text{P}$  NMR (162 MHz, Chloroform-*d*)  $\delta$  -24.77. HRMS(ESI) calcd. for  $\text{C}_{34}\text{H}_{36}\text{FeN}_2\text{O}_2\text{P}[\text{M}+\text{H}]^+$  : 591.1853, found: 591.1862.

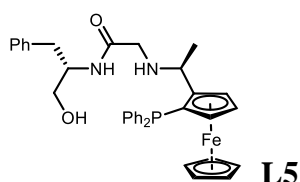

Yellow solid, 308.3 mg, 51% yield, m.p. 66 - 72 °C,  $[\alpha]_{\text{D}}^{25} = +214$  ( $c = 0.1$ ,  $\text{CH}_2\text{Cl}_2$ );  $^1\text{H}$  NMR (400 MHz, Chloroform-*d*)  $\delta$  7.56 - 7.49 (m, 2H), 7.42 - 7.34 (m, 4H), 7.31 - 7.13 (m, 9H), 4.41 - 4.36 (m, 1H), 4.33 - 4.28 (m, 1H), 4.13 - 4.06 (m, 1H), 3.97 (s, 5H), 3.90 - 3.85 (m, 1H), 3.85 - 3.80 (m, 1H), 3.61 - 3.55 (m, 1H), 3.48 - 3.41 (m, 1H), 2.92 - 2.67 (m, 4H), 1.23 (d,  $J = 6.7$  Hz, 3H).  $^{13}\text{C}$  NMR (101 MHz, Chloroform-*d*)  $\delta$  173.5, 140.1 (d,  $J = 9.4$  Hz), 137.8, 136.9 (d,  $J = 8.0$  Hz), 134.9 (d,  $J = 21.0$  Hz), 132.5 (d,  $J = 18.4$  Hz), 129.3, 129.2, 128.6, 128.5, 128.4, 128.2 (d,  $J = 7.8$  Hz), 126.6, 96.4 (d,  $J = 23.9$  Hz), 75.1 (d,  $J = 7.7$  Hz), 71.7 (d,  $J = 4.0$  Hz), 69.7, 69.5 (d,  $J = 4.4$  Hz), 69.2, 65.2, 53.7, 51.4 (d,  $J = 8.3$  Hz), 48.3, 36.8, 18.7.  $^{31}\text{P}$  NMR (162 MHz, Chloroform-*d*)  $\delta$  -24.66. HRMS(ESI) calcd. for  $\text{C}_{35}\text{H}_{38}\text{FeN}_2\text{O}_2\text{P}[\text{M}+\text{H}]^+$ : 605.2015, found: 605.2022.

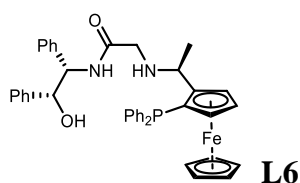

Yellow solid, 266.6 mg, 40% yield. m.p. 79 - 83 °C,  $[\alpha]_{\text{D}}^{25} = +176$  ( $c = 0.1$ ,  $\text{CH}_2\text{Cl}_2$ );  $^1\text{H}$  NMR (400 MHz, Chloroform-*d*)  $\delta$  8.02 (d,  $J = 8.4$  Hz, 1H), 7.56 - 7.51 (m, 2H), 7.40 - 7.37

(m, 3H), 7.24 - 7.15 (m, 11H), 7.03 - 7.00 (m, 2H), 6.97 - 6.93 (m, 2H), 5.18 - 5.09 (m, 1H), 4.95 - 4.89 (m, 1H), 4.40 (s, 1H), 4.32 - 4.29 (m, 1H), 4.14 - 4.08 (m, 1H), 3.99 (s, 5H), 3.83 - 3.80 (m, 1H), 2.90 (d,  $J = 17.4$  Hz, 1H), 2.73 (d,  $J = 17.4$  Hz, 1H), 1.27 (d,  $J = 6.7$  Hz, 3H).  $^{13}\text{C}$  NMR (101 MHz, Chloroform-*d*)  $\delta$  172.3, 139.9, 139.7 (d,  $J = 9.5$  Hz), 137.5, 136.7 (d,  $J = 8.5$  Hz), 134.7 (d,  $J = 20.9$  Hz), 132.5 (d,  $J = 18.8$  Hz), 129.2, 128.5, 128.5 (d,  $J = 6.3$  Hz), 128.2, 128.1, 128.0, 127.9, 127.7, 127.5 (d,  $J = 6.1$  Hz), 126.7, 96.2 (d,  $J = 23.5$  Hz), 75.0 (d,  $J = 7.8$  Hz), 71.5 (d,  $J = 4.1$  Hz), 70.5, 69.7, 69.6 (d,  $J = 4.2$  Hz), 69.2, 59.3, 51.6 (d,  $J = 8.3$  Hz), 48.2, 19.1.  $^{31}\text{P}$  NMR (162 MHz, Chloroform-*d*)  $\delta$  -24.80. HRMS(ESI) calcd. for  $\text{C}_{40}\text{H}_{40}\text{FeN}_2\text{O}_2\text{P}[\text{M}+\text{H}]^+$ : 667.2171, found: 667.2178.

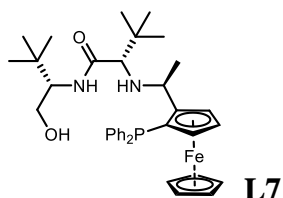

Yellow solid, 401.0 mg, 64% yield. m.p. 46 - 50 °C,  $[\alpha]_{\text{D}}^{25} = +216$  ( $c = 0.1$ ,  $\text{CH}_2\text{Cl}_2$ );  $^1\text{H}$  NMR (400 MHz, Chloroform-*d*)  $\delta$  7.83 - 7.74 (m, 1H), 7.57 - 7.53 (m, 2H), 7.41 - 7.37 (m, 3H), 7.26 - 7.15 (m, 5H), 4.49 - 4.45 (m, 1H), 4.39 - 4.35 (m, 1H), 4.07 - 4.02 (m, 1H), 3.95 (s, 5H), 3.91 - 3.86 (m, 2H), 3.66 - 3.62 (m, 1H), 3.56 - 3.52 (m, 1H), 2.78 (s, 1H), 1.46 (d,  $J = 6.6$  Hz, 3H), 0.94 (s, 9H), 0.61 (s, 9H).  $^{13}\text{C}$  NMR (101 MHz, Chloroform-*d*)  $\delta$  176.7, 140.6 (d,  $J = 8.7$  Hz), 137.3 (d,  $J = 8.3$  Hz), 135.4 (d,  $J = 21.9$  Hz), 132.2 (d,  $J = 17.2$  Hz), 129.4, 128.4 (d,  $J = 5.7$  Hz), 128.1 (d,  $J = 8.2$  Hz), 128.0, 99.0 (d,  $J = 26.5$  Hz), 74.2 (d,  $J = 8.8$  Hz), 71.1 (d,  $J = 4.4$  Hz), 70.9, 69.8, 69.6, 69.1 (d,  $J = 4.7$  Hz), 65.0, 61.1, 52.5 (d,  $J = 8.6$  Hz), 33.9, 33.0, 27.1, 27.0, 19.7.  $^{31}\text{P}$  NMR (162 MHz, Chloroform-*d*)  $\delta$  -26.05. HRMS(ESI) calcd. for  $\text{C}_{36}\text{H}_{48}\text{FeN}_2\text{O}_2\text{P}[\text{M}+\text{H}]^+$ : 627.2797, found: 627.2806.

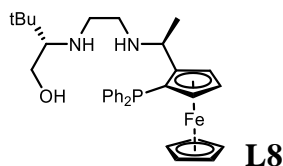



Yellow solid, 445.2 mg, 80% yield. m.p. 37 - 40 °C,  $[\alpha]_{\text{D}}^{25} = +312$  ( $c = 0.1$ ,  $\text{CH}_2\text{Cl}_2$ );  $^1\text{H}$  NMR (400 MHz, Chloroform-*d*)  $\delta$  7.59 - 7.48 (m, 2H), 7.41 - 7.28 (m, 8H), 4.52 - 4.46 (m, 1H), 4.32 - 4.26 (m, 1H), 4.04 (s, 6H), 3.80 - 3.74 (m, 1H), 3.57 - 3.49 (m, 1H), 3.16 - 3.05 (m, 1H), 2.53 - 2.42 (m, 1H), 2.23 - 2.16 (m, 1H), 2.15 - 2.08 (m, 2H), 2.03 - 1.99 (m, 1H), 1.47 (d,  $J = 6.5$  Hz, 3H), 0.79 (s, 9H).  $^{13}\text{C}$  NMR (101 MHz, Chloroform-*d*)  $\delta$  139.8 (d,  $J = 10.2$  Hz), 136.6 (d,  $J = 8.8$  Hz), 134.7 (d,  $J = 20.8$  Hz), 132.9 (d,  $J = 19.6$  Hz), 129.1, 128.7, 128.5 (d,  $J = 6.6$  Hz), 128.2 (d,  $J = 7.8$  Hz), 97.1 (d,  $J = 23.7$  Hz), 75.2 (d,  $J = 6.5$  Hz), 71.2 (d,  $J = 4.1$  Hz), 69.7, 69.4 (d,  $J = 4.0$  Hz), 69.1, 67.4, 61.6, 51.4 (d,  $J = 9.8$  Hz), 49.3, 46.6, 34.6, 27.0, 18.9.  $^{31}\text{P}$  NMR (162 MHz, Chloroform-*d*)  $\delta$  -25.53. HRMS(ESI) calcd. for  $\text{C}_{32}\text{H}_{42}\text{FeN}_2\text{OP}[\text{M}+\text{H}]^+$ : 557.2379, found: 557.2389.

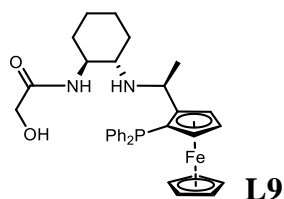

Yellow solid, 227.3 mg, 40% yield. m.p. 136 - 142 °C,  $[\alpha]_{\text{D}}^{25} = +126$  ( $c = 0.1$ ,  $\text{CH}_2\text{Cl}_2$ );  $^1\text{H}$  NMR (400 MHz, Chloroform-*d*)  $\delta$  7.55 - 7.47 (m, 2H), 7.40 - 7.20 (m, 8H), 6.61 (s, 1H), 4.53 - 4.48 (m, 1H), 4.29 (s, 1H), 4.24 - 4.14 (m, 1H), 4.03 (s, 5H), 3.84 - 3.79 (m, 2H), 3.75 - 3.70 (m, 1H), 2.69 - 2.58 (m, 1H), 2.36 - 2.26 (m, 1H), 2.13 - 1.98 (m, 2H), 1.62 - 1.47 (m, 2H), 1.43 (d,  $J = 6.4$  Hz, 3H), 1.12 - 0.98 (m, 2H), 1.00 - 0.91 (m, 1H), 0.47 - 0.28 (m, 1H).  $^{13}\text{C}$  NMR (101 MHz, Chloroform-*d*)  $\delta$  171.8, 139.4 (d,  $J = 9.5$  Hz), 136.3 (d,  $J = 8.3$  Hz), 134.9 (d,  $J = 21.0$  Hz), 132.7 (d,  $J = 19.1$  Hz), 129.2, 129.0, 128.7 (d,  $J = 6.5$  Hz), 128.1 (d,  $J = 7.9$  Hz), 97.2 (d,  $J = 23.6$  Hz), 74.7 (d,  $J = 6.3$  Hz), 71.4 (d,  $J = 4.3$  Hz), 69.6, 69.5 (d,  $J = 4.0$  Hz), 69.3, 61.9, 56.8, 53.4, 46.8 (d,  $J = 9.7$  Hz), 32.1, 30.2, 24.6, 24.2, 19.1.  $^{31}\text{P}$  NMR (162 MHz, Chloroform-*d*)  $\delta$  -25.09. HRMS(ESI) calcd. for  $\text{C}_{32}\text{H}_{38}\text{FeN}_2\text{O}_2\text{P}[\text{M}+\text{H}]^+$ : 569.2015, found: 569.2018.

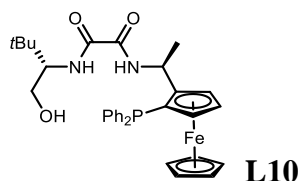

Yellow solid, 233.7 mg, 40% yield. m.p. 90 - 93 °C,  $[\alpha]_D^{25} = +399$  ( $c = 0.1$ ,  $\text{CH}_2\text{Cl}_2$ );  $^1\text{H}$  NMR (400 MHz, Chloroform-*d*)  $\delta$  7.89 (s, 1H), 7.55 (s, 2H), 7.42 - 7.34 (m, 4H), 7.22 - 7.18 (m, 3H), 7.15 - 7.09 (m, 2H), 5.25 - 5.14 (m, 1H), 4.51 - 4.48 (m, 1H), 4.35 - 4.31 (m, 1H), 4.00 (s, 5H), 3.85 - 3.82 (m, 1H), 3.80 - 3.74 (m, 1H), 3.64 - 3.50 (m, 2H), 1.50 (d,  $J = 6.8$  Hz, 3H), 0.94 (s, 9H).  $^{13}\text{C}$  NMR (101 MHz, Chloroform-*d*)  $\delta$  160.4, 157.2, 139.4 (d,  $J = 8.5$  Hz), 136.9 (d,  $J = 7.6$  Hz), 135.2 (d,  $J = 21.3$  Hz), 132.2 (d,  $J = 17.9$  Hz), 129.2, 128.1 (d,  $J = 8.1$  Hz), 127.9 (d,  $J = 6.1$  Hz), 127.8, 94.7 (d,  $J = 25.0$  Hz), 74.8 (d,  $J = 10.6$  Hz), 72.1 (d,  $J = 4.4$  Hz), 69.9 (d,  $J = 4.4$  Hz), 69.8, 69.5, 62.6, 60.8, 44.8 (d,  $J = 6.4$  Hz), 33.6, 26.8, 21.6.  $^{31}\text{P}$  NMR (162 MHz, Chloroform-*d*)  $\delta$  -24.47. HRMS(ESI) calcd. for  $\text{C}_{32}\text{H}_{38}\text{FeN}_2\text{O}_3\text{P}[\text{M}+\text{H}]^+$ : 585.1964, found: 585.1974.

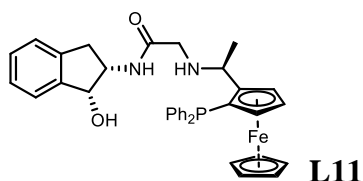

Yellow solid, 210.8 mg, 35% yield. m.p. 76 - 79 °C,  $[\alpha]_D^{25} = +268$  ( $c = 0.1$ ,  $\text{CH}_2\text{Cl}_2$ );  $^1\text{H}$  NMR (400 MHz, Chloroform-*d*)  $\delta$  7.78 - 7.71 (m, 1H), 7.48 - 7.42 (m, 2H), 7.38 - 7.34 (m, 3H), 7.25 - 7.11 (m, 9H), 5.31 - 5.24 (m, 1H), 4.55 - 4.48 (m, 1H), 4.45 - 4.42 (m, 1H), 4.31 - 4.28 (m, 1H), 4.21 - 4.15 (m, 1H), 3.97 (s, 5H), 3.82 - 3.79 (m, 1H), 3.14 - 3.05 (m, 2H), 2.93 - 2.84 (m, 2H), 1.41 (d,  $J = 6.8$  Hz, 3H).  $^{13}\text{C}$  NMR (101 MHz, Chloroform-*d*)  $\delta$  173.2, 140.4, 140.2, 139.8 (d,  $J = 9.6$  Hz), 136.8 (d,  $J = 8.6$  Hz), 134.8 (d,  $J = 21.2$  Hz), 132.5 (d,  $J = 18.7$  Hz), 129.1, 128.4, 128.3, 128.1 (d,  $J = 1.4$  Hz), 128.0, 127.0, 125.3, 124.6, 96.2 (d,  $J = 23.8$  Hz), 75.0 (d,  $J = 8.0$  Hz), 73.7, 71.5 (d,  $J = 4.1$  Hz), 70.4, 69.6, 69.1, 57.1, 51.5 (d,  $J = 8.1$  Hz), 48.4, 39.5, 19.1.  $^{31}\text{P}$  NMR (162 MHz, Chloroform-*d*)  $\delta$  -25.08. HRMS(ESI) calcd. for  $\text{C}_{35}\text{H}_{36}\text{FeN}_2\text{O}_2\text{P}[\text{M}+\text{H}]^+$ : 603.1858, found: 603.1868.

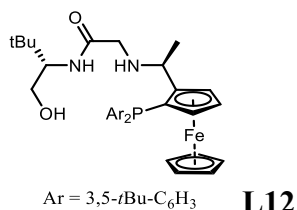

Yellow solid, 731.3 mg, 92% yield. m.p. 73 - 76 °C,  $[\alpha]_{\text{D}}^{25} = +194$  ( $c = 0.1$ , CH<sub>2</sub>Cl<sub>2</sub>); <sup>1</sup>H NMR (400 MHz, Chloroform-*d*)  $\delta$  7.75 - 7.69 (m, 1H), 7.44 - 7.36 (m, 3H), 7.33 - 7.29 (m, 1H), 7.24 - 7.18 (m, 2H), 4.39 - 4.35 (m, 1H), 4.30 - 4.23 (m, 1H), 4.15 - 4.09 (m, 1H), 4.06 (s, 5H), 3.83 - 3.77 (m, 1H), 3.73 - 3.70 (m, 1H), 3.61 - 3.56 (m, 1H), 3.47 - 3.39 (m, 1H), 2.71 (d,  $J = 17.8$  Hz, 1H), 2.55 (d,  $J = 17.8$  Hz, 1H), 1.35 (d,  $J = 6.9$  Hz, 3H), 1.30 (s, 18H), 1.22 (s, 18H), 0.90 (s, 9H). <sup>13</sup>C NMR (101 MHz, Chloroform-*d*)  $\delta$  174.5, 150.8 (d,  $J = 6.9$  Hz), 150.3 (d,  $J = 7.4$  Hz), 138.2 (d,  $J = 8.0$  Hz), 135.0 (d,  $J = 7.4$  Hz), 128.8 (d,  $J = 21.0$  Hz), 127.7 (d,  $J = 20.8$  Hz), 123.0, 122.8, 95.5 (d,  $J = 21.6$  Hz), 71.3 (d,  $J = 3.9$  Hz), 69.7, 69.1 (d,  $J = 3.7$  Hz), 68.6, 64.2, 60.6, 52.0 (d,  $J = 8.7$  Hz), 48.7, 34.9 (d,  $J = 6.7$  Hz), 33.3, 31.5, 31.4, 26.9, 19.1. <sup>31</sup>P NMR (162 MHz, Chloroform-*d*)  $\delta$  -23.87. HRMS(ESI) calcd. for C<sub>48</sub>H<sub>72</sub>FeN<sub>2</sub>O<sub>2</sub>P[M+H]<sup>+</sup>: 795.4675, found: 795.4685.

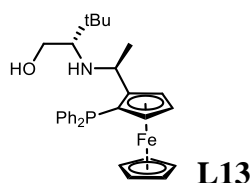

Yellow solid, 400.4 mg, 78% yield. m.p. 49 - 52 °C,  $[\alpha]_{\text{D}}^{25} = +240$  ( $c = 0.1$ , CH<sub>2</sub>Cl<sub>2</sub>); <sup>1</sup>H NMR (400 MHz, Chloroform-*d*)  $\delta$  7.56 - 7.51 (m, 2H), 7.39 - 7.35 (m, 3H), 7.25 - 7.19 (m, 5H), 4.50 - 4.45 (m, 1H), 4.37 - 4.32 (m, 1H), 4.27 - 4.20 (m, 1H), 3.99 (s, 5H), 3.87 - 3.80 (m, 1H), 3.36 (dd,  $J = 10.1, 5.1$  Hz, 1H), 2.89 (dd,  $J = 10.1, 7.8$  Hz, 1H), 2.38 (dd,  $J = 7.9, 5.1$  Hz, 1H), 1.46 (d,  $J = 6.4$  Hz, 3H), 0.61 (s, 9H). <sup>13</sup>C NMR (101 MHz, Chloroform-*d*)  $\delta$  140.2 (d,  $J = 9.2$  Hz), 137.3 (d,  $J = 9.0$  Hz), 135.3 (d,  $J = 21.6$  Hz), 132.5 (d,  $J = 18.1$  Hz), 129.2, 128.4 (d,  $J = 6.0$  Hz), 128.2, 128.0 (d,  $J = 8.1$  Hz), 99.9 (d,  $J = 25.7$  Hz), 74.1, 71.1 (d,  $J = 4.5$

Hz), 69.6, 69.5, 69.1 (d,  $J = 4.7$  Hz), 62.9, 59.9, 50.0 (d,  $J = 7.6$  Hz), 34.5, 26.8 (d,  $J = 1.9$  Hz), 21.2.  $^{31}\text{P}$  NMR (162 MHz, Chloroform- $d$ )  $\delta$  -25.74. HRMS (ESI) calcd for  $\text{C}_{30}\text{H}_{37}\text{FeNOP}$   $[\text{M}+\text{H}]^+$ : 514.1957; Found: 514.1943.

### III. General procedure for asymmetric hydrogenation of chalcones

General procedure for S/C = 2 000: To a 2.5 mL vial was added the catalyst precursor  $[\text{Ir}(\text{COD})\text{Cl}]_2$  (1.7 mg, 0.0025 mmol), ligand **L12** (4.4 mg, 0.0055 mmol) and anhydrous *i*-PrOH (2 mL) under argon atmosphere. The mixture was stirred for 1 h at room temperature to give a clear orange solution. An aliquot of the catalyst solution (20  $\mu\text{L}$ , 0.00005 mmol) was transferred into a 5 mL hydrogenation vessel, then  $\text{Cs}_2\text{CO}_3$  (1.6 mg, 0.005 mmol), ketone (0.1 mmol) and anhydrous *n*-hexane (2 mL) was added. The vessels were placed in an autoclave which was then charged with 50 atm of  $\text{H}_2$  and stirred at 25 - 30  $^\circ\text{C}$  for 12 h. After slowly releasing the hydrogen pressure, the reaction mixture was passed through a short column of silica gel to remove the metal complex. The product was analyzed by  $^1\text{H}$  NMR to determine the conversion. The ee values were determined by HPLC analysis on a chiral stationary phase.

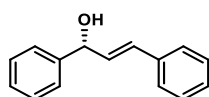

**(*R, E*)-1,3-diphenylprop-2-en-1-ol (4a).** Colorless oil, 20.0 mg, >99% yield; 97% ee;  $[\alpha]_{\text{D}}^{25} = +26.4$  ( $c = 1.00$ ,  $\text{CHCl}_3$ ). HPLC analysis (OD-H, *n*-hexane: isopropanol=90:10, 1.0 mL/min, 254 nm) indicated 97% ee:  $t_{\text{R}}$  (minor) = 17.4 min,  $t_{\text{R}}$  (major) = 22.7 min.  $^1\text{H}$  NMR (400 MHz, Chloroform- $d$ )  $\delta$  7.46 - 7.20 (m, 10H), 6.68 (dd,  $J = 15.8, 1.2$  Hz, 1H), 6.38 (dd,  $J = 15.8, 6.5$  Hz, 1H), 5.42 - 5.33 (m, 1H), 2.12 (s, 1H).  $^{13}\text{C}$  NMR (101 MHz, Chloroform- $d$ )  $\delta$  142.7, 136.5, 131.5, 130.5, 128.6, 128.5, 127.8, 127.8, 126.6, 126.3, 75.1.

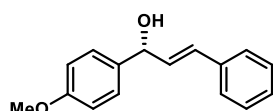

**(*R, E*)-1-(4-methoxyphenyl)-3-phenylprop-2-en-1-ol (4b).** Colorless oil, 23.9 mg, >99% yield; 93% ee;  $[\alpha]_{\text{D}}^{25} = +28.0$  ( $c = 1.00$ ,  $\text{CHCl}_3$ ). HPLC analysis (OD-H, *n*-hexane: isopropanol = 90:10, 1.0 mL/min, 254 nm) indicated 93% ee:  $t_{\text{R}}$  (minor) = 23.9 min,  $t_{\text{R}}$  (major)

= 35.3 min.  $^1\text{H}$  NMR (400 MHz, Chloroform-*d*)  $\delta$  7.41 - 7.27 (m, 6H), 7.25 - 7.19 (m, 1H), 6.90 (d,  $J$  = 8.7 Hz, 2H), 6.67 (dd,  $J$  = 16.2, 1.1 Hz, 1H), 6.38 (dd,  $J$  = 15.9, 6.3 Hz, 1H), 5.34 (d,  $J$  = 6.3 Hz, 1H), 3.81 (s, 3H), 2.00 (s, 1H).  $^{13}\text{C}$  NMR (101 MHz,  $\text{CDCl}_3$ )  $\delta$  159.3, 136.6, 135.0, 131.7, 130.2, 128.6, 127.7, 126.6, 114.0, 74.7, 55.3.

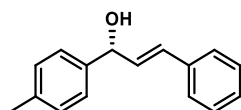

**(*R, E*)-3-phenyl-1-(*p*-tolyl)prop-2-en-1-ol (4c).** Colorless oil, 22.3 mg, >99% yield; 94% ee;  $[\alpha]_{\text{D}}^{25} = +16.6$  ( $c = 1.00$ ,  $\text{CHCl}_3$ ). HPLC analysis (OD-H, *n*-hexane: isopropanol = 90:10, 1.0 mL/min, 254 nm) indicated 94% ee:  $t_{\text{R}}$  (minor) = 14.9 min,  $t_{\text{R}}$  (major) = 23.1 min.  $^1\text{H}$  NMR (400 MHz, Chloroform-*d*)  $\delta$  7.42 - 7.27 (m, 6H), 7.25 - 7.15 (m, 3H), 6.68 (dd,  $J$  = 15.9, 1.3 Hz, 1H), 6.38 (dd,  $J$  = 15.8, 6.4 Hz, 1H), 5.39 - 5.32 (m, 1H), 2.35 (s, 3H), 1.97 (d,  $J$  = 3.5 Hz, 1H).  $^{13}\text{C}$  NMR (101 MHz,  $\text{CDCl}_3$ )  $\delta$  139.9, 137.6, 136.6, 131.7, 130.3, 129.3, 128.6, 127.7, 126.6, 126.3, 75.0, 21.2.

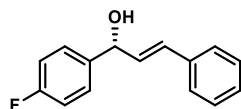

**(*R, E*)-1-(4-fluorophenyl)-3-phenylprop-2-en-1-ol (4d).** Colorless oil, 22.7 mg, >99% yield; 95% ee;  $[\alpha]_{\text{D}}^{25} = +24.7$  ( $c = 1.00$ ,  $\text{CHCl}_3$ ). HPLC analysis (OD-H, *n*-hexane : isopropanol = 90:10, 1.0 mL/min, 254 nm) indicated 95% ee:  $t_{\text{R}}$  (minor) = 13.9 min,  $t_{\text{R}}$  (major) = 20.5 min.  $^1\text{H}$  NMR (400 MHz, Chloroform-*d*)  $\delta$  7.44 - 7.35 (m, 4H), 7.35 - 7.28 (m, 2H), 7.28 - 7.21 (m, 1H), 7.10 - 7.00 (m, 2H), 6.68 (dd,  $J$  = 15.9, 1.3 Hz, 1H), 6.35 (dd,  $J$  = 15.8, 6.6 Hz, 1H), 5.41 - 5.34 (m, 1H), 2.03 (d,  $J$  = 3.4 Hz, 1H).  $^{13}\text{C}$  NMR (101 MHz, Chloroform-*d*)  $\delta$  162.35 (d,  $J$  = 246.1 Hz), 138.50 (d,  $J$  = 3.2 Hz), 136.35, 131.31, 130.81, 128.63, 128.06 (d,  $J$  = 8.1 Hz), 127.95, 126.63, 115.45 (d,  $J$  = 21.3 Hz), 74.51.

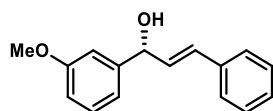

**(*R, E*)-1-(3-methoxyphenyl)-3-phenylprop-2-en-1-ol (4e).** Colorless oil, 23.9 mg, >99% yield; 86% ee;  $[\alpha]_{\text{D}}^{25} = +5.3$  ( $c = 1.00$ ,  $\text{CHCl}_3$ ). HPLC analysis (OD-H, *n*-hexane : isopropanol

= 90:10, 1.0 mL/min, 254 nm) indicated 86% ee:  $t_R$  (minor) = 24.7 min,  $t_R$  (major) = 34.7 min.  $^1H$  NMR (400 MHz, Chloroform-*d*)  $\delta$  7.43 - 7.35 (m, 2H), 7.34 - 7.27 (m, 3H), 7.27 - 7.20 (m, 1H), 7.05 - 6.96 (m, 2H), 6.87 - 6.80 (m, 1H), 6.69 (dd,  $J$  = 15.9, 1.2 Hz, 1H), 6.37 (dd,  $J$  = 15.8, 6.5 Hz, 1H), 5.36 (d,  $J$  = 5.9 Hz, 1H), 3.81 (s, 3H), 2.07 (d,  $J$  = 3.3 Hz, 1H).  $^{13}C$  NMR (101 MHz,  $CDCl_3$ )  $\delta$  159.9, 144.5, 136.5, 131.4, 130.7, 129.7, 128.6, 127.8, 126.6, 118.6, 113.4, 111.8, 75.1, 55.3.

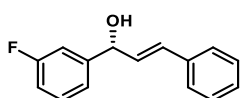

**(*R, E*)-1-(3-fluorophenyl)-3-phenylprop-2-en-1-ol (4f).** Colorless oil, 22.7 mg, >99% yield; 95% ee;  $[\alpha]_D^{25} = +1.2$  ( $c = 1.00$ ,  $CHCl_3$ ). HPLC analysis (OD-H, *n*-hexane: isopropanol = 90:10, 1.0 mL/min, 254 nm) indicated 95% ee:  $t_R$  (minor) = 15.4 min,  $t_R$  (major) = 22.9 min.  $^1H$  NMR (400 MHz, Chloroform-*d*)  $\delta$  7.42 - 7.28 (m, 5H), 7.28 - 7.22 (m, 1H), 7.22 - 7.13 (m, 2H), 7.03 - 6.92 (m, 1H), 6.69 (dd,  $J$  = 15.8, 1.2 Hz, 1H), 6.34 (dd,  $J$  = 15.8, 6.8 Hz, 1H), 5.38 (d,  $J$  = 6.7 Hz, 1H), 2.07 (s, 1H).  $^{13}C$  NMR (101 MHz, Chloroform-*d*)  $\delta$  163.1 (d,  $J$  = 246.1 Hz), 145.3 (d,  $J$  = 6.7 Hz), 136.3, 131.3, 130.9, 130.1 (d,  $J$  = 8.2 Hz), 128.6, 128.0, 126.7, 121.9 (d,  $J$  = 2.9 Hz), 114.6 (d,  $J$  = 21.3 Hz), 113.2 (d,  $J$  = 22.1 Hz), 74.6 (d,  $J$  = 1.9 Hz).

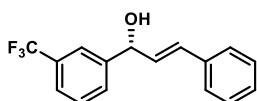

**(*R, E*)-3-phenyl-1-(3-(trifluoromethyl)phenyl)prop-2-en-1-ol (4g).** Yellow oil, 27.7 mg, >99% yield; 94% ee;  $[\alpha]_D^{25} = +1.2$  ( $c = 1.00$ ,  $CHCl_3$ ). HPLC analysis (OD-H, *n*-hexane : isopropanol = 90:10, 1.0 mL/min, 254 nm) indicated 94% ee:  $t_R$  (minor) = 13.2 min,  $t_R$  (major) = 22.2 min.  $^1H$  NMR (400 MHz, Chloroform-*d*)  $\delta$  7.72 (s, 1H), 7.61 (d,  $J$  = 7.6 Hz, 1H), 7.56 (d,  $J$  = 7.8 Hz, 1H), 7.52 - 7.44 (m, 1H), 7.43 - 7.36 (m, 2H), 7.36 - 7.28 (m, 2H), 7.30 - 7.22 (m, 1H), 6.71 (dd,  $J$  = 15.8, 1.2 Hz, 1H), 6.34 (dd,  $J$  = 15.8, 6.9 Hz, 1H), 5.44 (d,  $J$  = 6.9 Hz, 1H), 2.04 (m, 1H).  $^{13}C$  NMR (101 MHz, Chloroform-*d*)  $\delta$  143.6, 136.1, 131.6, 130.9 (q,  $J$  = 32.3 Hz), 130.7, 129.7, 129.0, 128.6, 128.1, 126.7, 124.5 (q,  $J$  = 3.8 Hz), 124.1 (q,  $J$  = 273.7 Hz), 123.0 (q,  $J$  = 3.8 Hz), 74.63.

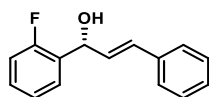

**(R, E)-1-(2-fluorophenyl)-3-phenylprop-2-en-1-ol (4h).** Colorless oil, 22.7 mg, >99% yield; 98% ee;  $[\alpha]_{\text{D}}^{25} = +28.0$  ( $c = 1.00$ ,  $\text{CHCl}_3$ ). HPLC analysis (OD-H, *n*-hexane : isopropanol = 92:8, 0.5 mL/min, 254 nm) indicated 98% ee:  $t_{\text{R}}$  (major) = 29.8 min,  $t_{\text{R}}$  (minor) = 31.3 min.  $^1\text{H}$  NMR (400 MHz, Chloroform-*d*)  $\delta$  7.49 - 7.26 (m, 6H), 7.26 - 7.15 (m, 1H), 7.12 - 6.98 (m, 2H), 6.87 (dd,  $J = 16.0, 1.3$  Hz, 1H), 6.47 (dd,  $J = 16.0, 6.5$  Hz, 1H), 5.44 - 5.37 (m, 1H), 2.07 (d,  $J = 3.5$  Hz, 1H).  $^{13}\text{C}$  NMR (101 MHz, Chloroform-*d*)  $\delta$  160.4 (d,  $J = 249.7$  Hz), 142.6, 134.0 (d,  $J = 4.8$  Hz), 129.1 (d,  $J = 8.5$  Hz), 128.7, 127.91, 127.6 (d,  $J = 3.6$  Hz), 126.4, 124.3 (d,  $J = 12.2$  Hz), 124.1 (d,  $J = 3.6$  Hz), 122.9 (d,  $J = 3.7$  Hz), 115.8 (d,  $J = 22.2$  Hz), 75.3.

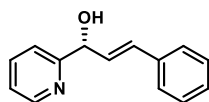

**(R, E)-3-phenyl-1-(pyridin-2-yl)prop-2-en-1-ol (4i).** Colorless oil, 21.0 mg, >99% yield; 93% ee;  $[\alpha]_{\text{D}}^{25} = +22.6$  ( $c = 1.00$ ,  $\text{CHCl}_3$ ). HPLC analysis (OD-H, *n*-hexane: isopropanol = 95:5, 0.5 mL/min, 254 nm) indicated 93% ee:  $t_{\text{R}}$  (minor) = 51.3 min,  $t_{\text{R}}$  (major) = 54.6 min.  $^1\text{H}$  NMR (400 MHz, Chloroform-*d*)  $\delta$  8.75 (m, 1H), 8.31 (d,  $J = 16.0$  Hz, 1H), 8.20 (m, 1H), 7.95 (d,  $J = 16.1$  Hz, 1H), 7.88 (m, 1H), 7.79 - 7.69 (m, 2H), 7.49 (m, 1H), 7.42 (m, 4H), 1.61 (m, 1H).  $^{13}\text{C}$  NMR (101 MHz,  $\text{CDCl}_3$ )  $\delta$  189.5, 154.3, 148.9, 144.8, 137.0, 135.2, 130.6, 128.9, 126.9, 123.0, 120.9, 29.7.

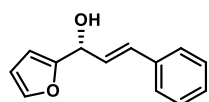

**(R, E)-1-(furan-2-yl)-3-phenylprop-2-en-1-ol (4j).** Colorless oil, 19.7 mg, >99% yield; 91% ee;  $[\alpha]_{\text{D}}^{25} = +21.1$  ( $c = 1.00$ ,  $\text{CHCl}_3$ ). HPLC analysis (OD-H, *n*-hexane: isopropanol = 90:10, 1.0 mL/min, 254 nm) indicated 91% ee:  $t_{\text{R}}$  (minor) = 14.8 min,  $t_{\text{R}}$  (major) = 20.7 min.  $^1\text{H}$  NMR (400 MHz, Chloroform-*d*)  $\delta$  7.43 - 7.39 (m, 3H), 7.32 (m, 2H), 7.24 (m, 1H), 6.73 (dd,  $J = 15.9, 1.3$  Hz, 1H), 6.45 (dd,  $J = 15.9, 6.4$  Hz, 1H), 6.35 (m, 1H), 6.30 (m, 1H), 5.43 -

5.36 (m, 1H), 2.26 (m, 1H).  $^{13}\text{C}$  NMR (101 MHz, Chloroform-*d*)  $\delta$  155.1, 142.5, 136.3, 131.9, 128.6, 128.0, 127.9, 126.7, 110.3, 106.7, 68.5.

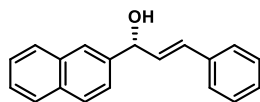

**(*R, E*)-1-(naphthalen-2-yl)-3-phenylprop-2-en-1-ol (4k).** Colorless oil, 24.5 mg, >99% yield; 94% ee;  $[\alpha]_{\text{D}}^{25} = +30.5$  ( $c = 1.00$ ,  $\text{CHCl}_3$ ). HPLC analysis (OD-H, *n*-hexane: isopropanol = 90:10, 1.0 mL/min, 254 nm) indicated 94% ee:  $t_{\text{R}}$  (minor) = 26.4 min,  $t_{\text{R}}$  (major) = 44.4 min.  $^1\text{H}$  NMR (400 MHz, Chloroform-*d*)  $\delta$  7.91 - 7.77 (m, 4H), 7.55 - 7.19 (m, 8H), 6.71 (dd,  $J = 15.9, 1.2$  Hz, 1H), 6.43 (dd,  $J = 15.9, 6.5$  Hz, 1H), 5.51 (d,  $J = 6.4$  Hz, 1H), 2.31 (s, 1H).  $^{13}\text{C}$  NMR (101 MHz, Chloroform-*d*)  $\delta$  140.1, 136.5, 133.3, 133.0, 131.3, 130.8, 128.6, 128.4, 128.0, 127.8, 127.7, 126.6, 126.2, 126.0, 124.9, 124.5, 75.2.

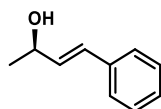

**(*R, E*)-4-phenylbut-3-en-2-ol (4l).** Colorless oil, 14.0 mg, >99% yield; 90% ee;  $[\alpha]_{\text{D}}^{25} = +17.8$  ( $c = 1.00$ ,  $\text{CHCl}_3$ ). HPLC analysis (OD-H, *n*-hexane: isopropanol=90:10, 1.0 mL/min, 254 nm) indicated 90% ee:  $t_{\text{R}}$  (minor) = 10.0 min,  $t_{\text{R}}$  (major) = 15.8 min.  $^1\text{H}$  NMR (400 MHz, Chloroform-*d*)  $\delta$  7.42 - 7.27 (m, 4H), 7.27 - 7.20 (m, 1H), 6.57 (dd,  $J = 15.9, 1.2$  Hz, 1H), 6.26 (dd,  $J = 15.9, 6.4$  Hz, 1H), 4.49 (m, 1H), 1.66 (m, 1H), 1.37 (d,  $J = 6.4$  Hz, 3H).  $^{13}\text{C}$  NMR (101 MHz,  $\text{CDCl}_3$ )  $\delta$  136.7, 133.6, 129.4, 128.6, 127.7, 126.5, 23.4.

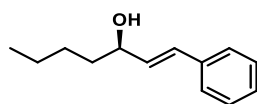

**(*R, E*)-1-phenylhept-1-en-3-ol (4m).** Colorless oil, 20.7 mg, >99% yield; 90% ee;  $[\alpha]_{\text{D}}^{25} = +13.7$  ( $c = 1.00$ ,  $\text{CHCl}_3$ ). HPLC analysis (OD-H, *n*-hexane: isopropanol = 90:10, 1.0 mL/min, 254 nm) indicated 90% ee:  $t_{\text{R}}$  (major) = 7.8 min,  $t_{\text{R}}$  (minor) = 12.5 min.  $^1\text{H}$  NMR (400 MHz, Chloroform-*d*)  $\delta$  7.41 - 7.20 (m, 5H), 6.55 (dd,  $J = 15.9, 1.1$  Hz, 1H), 6.21 (dd,  $J = 15.9, 6.8$  Hz, 1H), 4.32 - 4.19 (m, 1H), 1.76 (s, 1H), 1.70 - 1.55 (m, 2H), 1.45 - 1.29 (m, 4H), 0.96 - 0.87



(m, 3H).  $^{13}\text{C}$  NMR (101 MHz, Chloroform-*d*)  $\delta$  136.7, 132.6, 130.1, 128.5, 127.6, 126.4, 73.1, 37.0, 27.6, 22.6, 14.0.

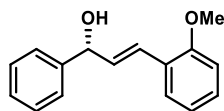

**(*R, E*)-3-(2-methoxyphenyl)-1-phenylprop-2-en-1-ol (4n).** Colorless oil, 23.5 mg, >99% yield; 89% ee;  $[\alpha]_{\text{D}}^{25} = +2.0$  ( $c = 1.00$ ,  $\text{CHCl}_3$ ). HPLC analysis (IC-H, *n*-hexane: isopropanol = 95:05, 1.0 mL/min, 254 nm) indicated 89% ee:  $t_{\text{R}}$  (major) = 19.2 min,  $t_{\text{R}}$  (minor) = 23.5 min.  $^1\text{H}$  NMR (400 MHz, Chloroform-*d*)  $\delta$  7.48 - 7.33 (m, 5H), 7.32 - 7.26 (m, 1H), 7.25 - 7.19 (m, 1H), 7.04 (d,  $J = 16.2$  Hz, 1H), 6.95 - 6.83 (m, 2H), 6.40 (dd,  $J = 15.9, 6.9$  Hz, 1H), 5.42 - 5.36 (m, 1H), 3.85 (s, 3H), 2.05 (d,  $J = 3.2$  Hz, 1H).  $^{13}\text{C}$  NMR (101 MHz,  $\text{CDCl}_3$ )  $\delta$  156.9, 143.0, 132.1, 128.9, 128.6, 127.6, 127.1, 126.3, 125.6, 125.5, 120.6, 110.9, 75.7, 55.5.

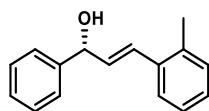

**(*R, E*)-1-phenyl-3-(*o*-tolyl)prop-2-en-1-ol (4o).** Colorless oil, 21.6 mg, >99% yield; 97% ee;  $[\alpha]_{\text{D}}^{25} = +16.0$  ( $c = 1.00$ ,  $\text{CHCl}_3$ ). HPLC analysis (OD-H, *n*-hexane: isopropanol = 90:10, 1.0 mL/min, 254 nm) indicated 97% ee:  $t_{\text{R}}$  (minor) = 16.6min,  $t_{\text{R}}$  (major) = 22.0 min.  $^1\text{H}$  NMR (400 MHz, Chloroform-*d*)  $\delta$  7.47 - 7.26 (m, 6H), 7.17 - 7.11 (m, 3H), 6.91 (dd,  $J = 15.7, 1.3$  Hz, 1H), 6.27 (dd,  $J = 15.7, 6.6$  Hz, 1H), 5.40 (d,  $J = 6.6$  Hz, 1H), 2.36 (s, 3H), 2.05 (s, 1H).  $^{13}\text{C}$  NMR (101 MHz,  $\text{CDCl}_3$ )  $\delta$  142.9, 135.7, 135.6, 132.9, 130.3, 128.7, 128.4, 127.8, 127.7, 126.4, 126.1, 125.8, 75.4, 19.8.

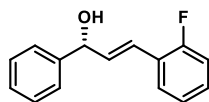

**(*R, E*)-3-(2-fluorophenyl)-1-phenylprop-2-en-1-ol (4p).** Colorless oil, 23.1 mg, >99% yield; 98% ee;  $[\alpha]_{\text{D}}^{25} = +27.0$  ( $c = 1.00$ ,  $\text{CHCl}_3$ ). HPLC analysis (OD-H, *n*-hexane: isopropanol = 92:8, 0.5 mL/min, 254 nm) indicated 98% ee:  $t_{\text{R}}$  (major) = 30.3min,  $t_{\text{R}}$  (minor) = 32.0 min.  $^1\text{H}$  NMR (400 MHz, Chloroform-*d*)  $\delta$  7.47 - 7.26 (m, 6H), 7.23 - 7.15 (m, 1H), 7.11 - 6.97 (m,

2H), 6.86 (dd,  $J = 16.0, 1.3$  Hz, 1H), 6.46 (dd,  $J = 16.0, 6.5$  Hz, 1H), 5.38 (dd, 1H), 2.17 (d,  $J = 3.5$  Hz, 1H).  $^{13}\text{C}$  NMR (101 MHz, Chloroform- $d$ )  $\delta$  160.3 (d,  $J = 249.5$  Hz), 142.5, 134.0 (d,  $J = 4.7$  Hz), 129.0 (d,  $J = 8.4$  Hz), 128.6, 127.9, 127.6 (d,  $J = 3.7$  Hz), 126.3, 124.3 (d,  $J = 12.2$  Hz), 124.1 (d,  $J = 3.6$  Hz), 122.9 (d,  $J = 3.7$  Hz), 115.7 (d,  $J = 22.1$  Hz), 75.3.

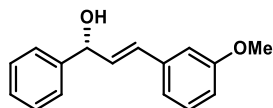

**(*R, E*)-3-(3-methoxyphenyl)-1-phenylprop-2-en-1-ol (4q).** Colorless oil, 23.9 mg, >99% yield; 99% ee;  $[\alpha]_{\text{D}}^{25} = +27.4$  ( $c = 1.00$ ,  $\text{CHCl}_3$ ). HPLC analysis (OD-H,  $n$ -hexane: isopropanol = 90:10, 1.0 mL/min, 254 nm) indicated 99% ee:  $t_{\text{R}}$  (minor) = 33.5min,  $t_{\text{R}}$  (major) = 73.0 min.  $^1\text{H}$  NMR (400 MHz, Chloroform- $d$ )  $\delta$  7.48 - 7.27 (m, 5H), 7.25 - 7.18 (m, 1H), 7.02 - 6.95 (m, 1H), 6.95 - 6.89 (m, 1H), 6.83 - 6.76 (m, 1H), 6.66 (dd,  $J = 15.8, 1.3$  Hz, 1H), 6.38 (dd,  $J = 15.9, 6.5$  Hz, 1H), 5.39 (dd,  $J = 6.4, 1.2$  Hz, 1H), 3.80 (s, 3H), 2.04 (s, 1H).  $^{13}\text{C}$  NMR (101 MHz,  $\text{CDCl}_3$ )  $\delta$  159.8, 142.7, 138.0, 131.8, 130.5, 129.6, 128.7, 127.9, 126.4, 119.3, 113.6, 111.8, 75.1, 55.2.

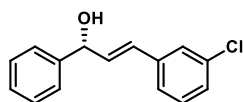

**(*R, E*)-3-(3-chlorophenyl)-1-phenylprop-2-en-1-ol (4r).** Colorless oil, 25.1 mg, >99% yield; 97% ee;  $[\alpha]_{\text{D}}^{25} = +22.4$  ( $c = 1.00$ ,  $\text{CHCl}_3$ ). HPLC analysis (OD-H,  $n$ -hexane: isopropanol = 90:10, 1.0 mL/min, 254 nm) indicated 97% ee:  $t_{\text{R}}$  (minor) = 14.1min,  $t_{\text{R}}$  (major) = 18.6 min.  $^1\text{H}$  NMR (400 MHz, Chloroform- $d$ )  $\delta$  7.45 - 7.28 (m, 6H), 7.25 - 7.18 (m, 3H), 6.64 (dd,  $J = 15.9, 1.3$  Hz, 1H), 6.40 (dd,  $J = 15.8, 6.2$  Hz, 1H), 5.42 - 5.36 (m, 1H), 2.05 (d,  $J = 3.6$  Hz, 1H).  $^{13}\text{C}$  NMR (101 MHz,  $\text{CDCl}_3$ )  $\delta$  142.5, 138.5, 134.5, 133.0, 129.8, 129.0, 128.7, 128.0, 127.7, 126.5, 126.4, 124.8, 74.9.

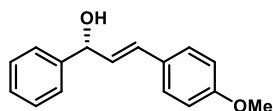

**(*R, E*)-3-(4-methoxyphenyl)-1-phenylprop-2-en-1-ol (4s).** Colorless oil, 23.2 mg, >99%

yield; 94% ee;  $[\alpha]_{\text{D}}^{25} = +23.8$  ( $c = 1.00$ ,  $\text{CHCl}_3$ ). HPLC analysis (OD-H, *n*-hexane: isopropanol = 90:10, 1.0 mL/min, 254 nm) indicated 94% ee:  $t_{\text{R}}$  (major) = 21.4 min,  $t_{\text{R}}$  (minor) = 24.7 min.  $^1\text{H}$  NMR (400 MHz, Chloroform-*d*)  $\delta$  7.46 - 7.26 (m, 7H), 6.84 (d,  $J = 8.8$  Hz, 2H), 6.62 (dd,  $J = 15.8$ , 1.2 Hz, 1H), 6.25 (dd,  $J = 15.8$ , 6.7 Hz, 1H), 5.36 (d,  $J = 6.8$  Hz, 1H), 3.80 (s, 3H), 2.04 (d,  $J = 2.9$  Hz, 1H).  $^{13}\text{C}$  NMR (101 MHz,  $\text{CDCl}_3$ )  $\delta$  159.4, 143.0, 130.3, 129.4, 129.3, 128.6, 127.8, 127.7, 126.3, 114.0, 75.3, 55.3.

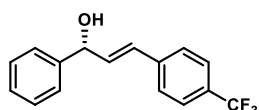

**(*R, E*)-1-phenyl-3-(4-(trifluoromethyl)phenyl)prop-2-en-1-ol (4t).** Colorless oil, 28.5 mg, >99% yield; 97% ee;  $[\alpha]_{\text{D}}^{25} = +23.8$  ( $c = 1.00$ ,  $\text{CHCl}_3$ ). HPLC analysis (OD-H, *n*-hexane: isopropanol = 90:10, 1.0 mL/min, 254 nm) indicated 97% ee:  $t_{\text{R}}$  (major) = 10.0 min,  $t_{\text{R}}$  (minor) = 11.5 min.  $^1\text{H}$  NMR (400 MHz, Chloroform-*d*)  $\delta$  7.47 - 7.21 (m, 7H), 7.10 - 7.00 (m, 2H), 6.68 (dd,  $J = 15.9$ , 1.2 Hz, 1H), 6.35 (dd,  $J = 15.8$ , 6.6 Hz, 1H), 5.38 (dd,  $J = 7.1$ , 2.8 Hz, 1H), 2.03 (d,  $J = 3.4$  Hz, 1H).  $^{13}\text{C}$  NMR (101 MHz, Chloroform-*d*)  $\delta$  162.4 (d,  $J = 246.1$  Hz), 138.5 (d,  $J = 3.2$  Hz), 136.4, 131.3, 130.8, 128.6, 128.1, 128.0, 128.0, 126.6, 115.5 (d,  $J = 21.3$  Hz), 74.5.

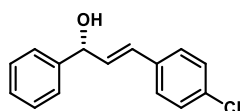

**(*R, E*)-3-(4-chlorophenyl)-1-phenylprop-2-en-1-ol (4u).** Colorless oil, 22.8 mg, >99% yield; 96% ee;  $[\alpha]_{\text{D}}^{25} = +24.3$  ( $c = 1.00$ ,  $\text{CHCl}_3$ ). HPLC analysis (OD-H, *n*-hexane: isopropanol = 90:10, 1.0 mL/min, 254 nm) indicated 96% ee:  $t_{\text{R}}$  (major) = 12.9 min,  $t_{\text{R}}$  (minor) = 17.2 min.  $^1\text{H}$  NMR (400 MHz, Chloroform-*d*)  $\delta$  7.46 - 7.26 (m, 9H), 6.65 (dd,  $J = 15.9$ , 1.3 Hz, 1H), 6.36 (dd,  $J = 15.8$ , 6.3 Hz, 1H), 5.41 - 5.36 (m, 1H), 2.04 (s, 1H).  $^{13}\text{C}$  NMR (101 MHz,  $\text{CDCl}_3$ )  $\delta$  142.6, 135.1, 133.4, 132.2, 129.2, 128.8, 128.7, 128.0, 127.8, 126.4, 75.0.

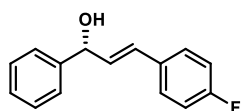

**(R, E)-3-(4-fluorophenyl)-1-phenylprop-2-en-1-ol (4v).** Colorless oil, 23.2 mg, >99% yield; 96% ee;  $[\alpha]_{\text{D}}^{25} = +22.6$  ( $c = 1.00$ ,  $\text{CHCl}_3$ ). HPLC analysis (OD-H, *n*-hexane: isopropanol = 90:10, 1.0 mL/min, 254 nm) indicated 96% ee:  $t_{\text{R}}$  (major) = 11.4 min,  $t_{\text{R}}$  (minor) = 14.0 min.  $^1\text{H}$  NMR (400 MHz, Chloroform-*d*)  $\delta$  7.45 - 7.27 (m, 7H), 6.99 (t,  $J = 8.7$  Hz, 2H), 6.65 (dd,  $J = 15.9, 1.3$  Hz, 1H), 6.30 (dd,  $J = 15.9, 6.5$  Hz, 1H), 5.38 (d,  $J = 6.5$  Hz, 1H), 2.03 (s, 1H).  $^{13}\text{C}$  NMR (101 MHz, Chloroform-*d*)  $\delta$  162.4 (d,  $J = 247.0$  Hz), 142.7, 132.7 (d,  $J = 3.6$  Hz), 131.3 (d,  $J = 2.2$  Hz), 129.4, 128.7, 128.2 (d,  $J = 8.1$  Hz), 127.9, 126.3, 115.5 (d,  $J = 21.6$  Hz), 75.1.

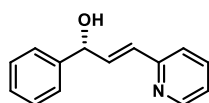

**(R, E)-1-phenyl-3-(pyridin-2-yl)prop-2-en-1-ol (4w).** Colorless oil, 20.5 mg, >99% yield; 96% ee;  $[\alpha]_{\text{D}}^{25} = +22.6$  ( $c = 1.00$ ,  $\text{CHCl}_3$ ). HPLC analysis (OD-H, *n*-hexane: isopropanol = 90:10, 1.0 mL/min, 254 nm) indicated 96% ee:  $t_{\text{R}}$  (minor) = 23.9 min,  $t_{\text{R}}$  (major) = 29.0 min.  $^1\text{H}$  NMR (400 MHz, Chloroform-*d*)  $\delta$  8.52 (d,  $J = 4.6$  Hz, 1H), 7.67 - 7.55 (m, 1H), 7.50 - 7.41 (m, 2H), 7.40 - 7.33 (m, 2H), 7.33 - 7.26 (m, 2H), 7.17 - 7.08 (m, 1H), 6.89 (dd,  $J = 15.7, 5.7$  Hz, 1H), 6.84 - 6.75 (dd,  $J = 16.0, 4.0$  Hz, 1H), 5.45 (d,  $J = 5.7$  Hz, 1H), 1.75 (s, 1H).  $^{13}\text{C}$  NMR (101 MHz,  $\text{CDCl}_3$ )  $\delta$  155.2, 149.4, 142.5, 136.6, 136.4, 129.6, 128.7, 127.8, 126.5, 122.3, 121.8, 74.6.

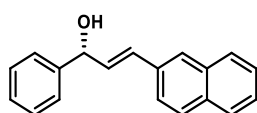

**(R, E)-3-(naphthalen-2-yl)-1-phenylprop-2-en-1-ol (4x).** Colorless oil, 28.2 mg, >99% yield; 97% ee;  $[\alpha]_{\text{D}}^{25} = +11.5$  ( $c = 1.00$ ,  $\text{CHCl}_3$ ). HPLC analysis (OD-H, *n*-hexane: isopropanol = 90:10, 1.0 mL/min, 254 nm) indicated 97% ee:  $t_{\text{R}}$  (major) = 24.7 min,  $t_{\text{R}}$  (minor) = 29.3 min.  $^1\text{H}$  NMR (400 MHz, Chloroform-*d*)  $\delta$  7.81 - 7.73 (m, 4H), 7.61 - 7.56 (m, 1H), 7.49 - 7.28 (m, 7H), 6.85 (dd,  $J = 15.8, 1.2$  Hz, 1H), 6.51 (dd,  $J = 15.8, 6.5$  Hz, 1H), 5.51 - 5.38 (m, 1H), 2.17 - 2.08 (m, 1H).  $^{13}\text{C}$  NMR (101 MHz, Chloroform-*d*)  $\delta$  142.8, 134.0, 133.6, 133.1, 131.9, 130.7, 128.7, 128.2, 128.0, 127.9, 127.7, 126.7, 126.4, 126.3, 126.0, 123.7, 75.3.

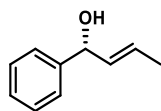

**(*R, E*)-1-phenylbut-2-en-1-ol (4y).** Colorless oil, 16.3 mg, >99% yield; 95% ee;  $[\alpha]_D^{25} = +0.5$  ( $c = 1.00$ ,  $\text{CHCl}_3$ ). HPLC analysis (OD-H, *n*-hexane: isopropanol = 90:10, 1.0 mL/min, 254 nm) indicated 95% ee:  $t_R$  (major) = 6.7 min,  $t_R$  (minor) = 7.3 min.  $^1\text{H}$  NMR (400 MHz, Chloroform-*d*)  $\delta$  7.42 - 7.20 (m, 5H), 6.57 (dd,  $J = 15.9, 1.2$  Hz, 1H), 6.26 (dd,  $J = 15.9, 6.4$  Hz, 1H), 4.55 - 4.43 (m, 1H), 1.63 (s, 1H), 1.37 (d,  $J = 6.4$  Hz, 3H).  $^{13}\text{C}$  NMR (101 MHz, Chloroform-*d*)  $\delta$  136.7, 133.5, 129.4, 128.6, 127.6, 126.4, 68.9, 23.4.

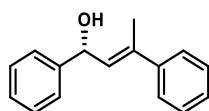

**(*R, E*)-1,3-diphenylbut-2-en-1-ol (4z).** Colorless oil, 24.4 mg, >99% yield; 99% ee;  $[\alpha]_D^{25} = +34.4$  ( $c = 1.00$ ,  $\text{CHCl}_3$ ). HPLC analysis (OD-H, *n*-hexane: isopropanol = 90:10, 1.0 mL/min, 254 nm) indicated 99% ee:  $t_R$  (minor) = 11.3 min,  $t_R$  (major) = 18.8 min.  $^1\text{H}$  NMR (400 MHz, Chloroform-*d*)  $\delta$  7.47 - 7.26 (m, 10H), 6.01 (dd,  $J = 8.6, 1.3$  Hz, 1H), 5.65 (dd,  $J = 8.5, 2.7$  Hz, 1H), 2.20 (d,  $J = 1.4$  Hz, 3H), 1.96 (d,  $J = 3.2$  Hz, 1H).  $^{13}\text{C}$  NMR (101 MHz, Chloroform-*d*)  $\delta$  143.6, 142.7, 137.3, 130.1, 128.6, 128.2, 127.6, 127.4, 126.0, 125.9, 71.1, 16.5.

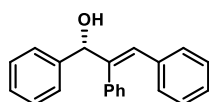

**(*S, E*)-1,2,3-triphenylprop-2-en-1-ol (4aa).** Colorless oil, 29.2 mg, >99% yield; 99% ee;  $[\alpha]_D^{25} = +33.3$  ( $c = 1.00$ ,  $\text{CHCl}_3$ ). HPLC analysis (OD-H, *n*-hexane: isopropanol = 90:10, 1.0 mL/min, 254 nm) indicated 99% ee:  $t_R$  (major) = 10.1 min,  $t_R$  (minor) = 11.8min.  $^1\text{H}$  NMR (400 MHz, Chloroform-*d*)  $\delta$  7.36 - 7.25 (m, 5H), 7.24 - 7.18 (m, 3H), 7.11 - 7.06 (m, 3H), 6.98 - 6.91 (m, 4H), 6.87 (d,  $J = 1.2$  Hz, 1H), 5.55 (s, 1H), 2.16 (d,  $J = 3.8$  Hz, 1H).  $^{13}\text{C}$  NMR (101 MHz, Chloroform-*d*)  $\delta$  143.9, 141.7, 138.0, 136.4, 129.4, 129.3, 128.5, 128.3, 128.0, 127.7, 127.4, 127.2, 127.0, 126.9, 79.2.

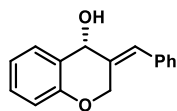

**(*R, E*)-3-benzylidenechroman-4-ol (4ab).** Colorless oil, 23.0 mg, >99% yield; 88% ee;  $[\alpha]_{\text{D}}^{25} = +0.8$  ( $c = 1.00$ ,  $\text{CHCl}_3$ ). HPLC analysis (OD-H, *n*-hexane: isopropanol = 90:10, 1.0 mL/min, 254 nm) indicated 88% ee:  $t_{\text{R}}$  (minor) = 12.9 min,  $t_{\text{R}}$  (major) = 21.5 min.  $^1\text{H}$  NMR (400 MHz, Chloroform-*d*)  $\delta$  7.44 - 7.19 (m, 7H), 7.01 - 6.93 (m, 2H), 6.86 (dd,  $J = 8.2, 1.2$  Hz, 1H), 5.21 (s, 1H), 4.97 - 4.88 (m, 2H), 2.10 (s, 1H).  $^{13}\text{C}$  NMR (101 MHz, Chloroform-*d*)  $\delta$  154.5, 135.7, 134.6, 129.8, 129.2, 129.1, 128.9, 128.5, 127.6, 125.0, 121.2, 117.0, 69.3, 62.8.

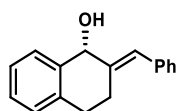

**(*R, E*)-2-benzylidene-1,2,3,4-tetrahydronaphthalen-1-ol (4ac).** Colorless oil, 23.1 mg, >99% yield; 89% ee;  $[\alpha]_{\text{D}}^{25} = +37.8$  ( $c = 1.00$ ,  $\text{CHCl}_3$ ). HPLC analysis (OD-H, *n*-hexane: isopropanol = 90:10, 1.0 mL/min, 254 nm) indicated 89% ee:  $t_{\text{R}}$  (minor) = 12.5 min,  $t_{\text{R}}$  (major) = 14.6 min.  $^1\text{H}$  NMR (400 MHz, Chloroform-*d*)  $\delta$  7.51 - 7.46 (m, 1H), 7.38 - 7.27 (m, 5H), 7.26 - 7.25 (m, 1H), 7.24 - 7.21 (m, 1H), 7.17 - 7.13 (m, 1H), 6.74 (s, 1H), 5.19 (d,  $J = 4.3$  Hz, 1H), 3.06 - 2.85 (m, 2H), 2.84 - 2.77 (m, 2H), 1.98 (d,  $J = 5.0$  Hz, 1H).  $^{13}\text{C}$  NMR (101 MHz, Chloroform-*d*)  $\delta$  140.9, 138.7, 137.4, 137.3, 128.9, 128.4, 128.3, 128.0, 127.9, 126.7, 126.6, 125.5, 73.9, 29.9, 24.1.

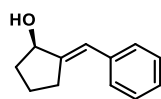

**(*R, E*)-2-benzylidenecyclopentan-1-ol (4ad).** Colorless oil, 16.9 mg, >99% yield; > 99% ee;  $[\alpha]_{\text{D}}^{25} = -12.5$  ( $c = 1.00$ ,  $\text{CHCl}_3$ ). HPLC analysis (AD-H, *n*-hexane: isopropanol = 95:05, 1.0 mL/min, 254 nm) indicated >99% ee:  $t_{\text{R}}$  (major) = 14.5 min,  $t_{\text{R}}$  (minor) = 15.9 min.  $^1\text{H}$  NMR (400 MHz, Chloroform-*d*)  $\delta$  7.39 - 7.31 (m, 4H), 7.24 - 7.20 (m, 1H), 6.58 (d,  $J = 2.0$  Hz, 1H), 4.60 (d,  $J = 5.3$  Hz, 1H), 2.79 - 2.55 (m, 2H), 2.01 - 1.91 (m, 2H), 1.77 - 1.62 (m, 2H), 1.56 - 1.51 (m, 1H).  $^{13}\text{C}$  NMR (101 MHz, Chloroform-*d*)  $\delta$  147.8, 137.8, 128.5, 128.4, 128.3, 126.6, 123.7, 34.9, 29.4, 22.6.

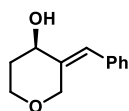

**(R, E)-3-benzylidenetetrahydro-2H-pyran-4-ol (4ae).** Colorless oil, 19.5 mg, >99% yield; 98% ee;  $[\alpha]_D^{25} = +25.2$  ( $c = 1.00$ ,  $\text{CHCl}_3$ ). HPLC analysis (OD-H, *n*-hexane: isopropanol = 90:10, 1.0 mL/min, 254 nm) indicated 98% ee:  $t_R$  (minor) = 15.1 min,  $t_R$  (major) = 16.0 min.  $^1\text{H}$  NMR (400 MHz, Chloroform-*d*)  $\delta$  7.37 - 7.29 (m, 2H), 7.28 - 7.22 (m, 1H), 7.19 - 7.12 (m, 2H), 6.66 (s, 1H), 4.60 (d,  $J = 12.9$  Hz, 1H), 4.52 - 4.39 (m, 1H), 4.17 (d,  $J = 12.1$  Hz, 1H), 4.08 - 3.95 (m, 1H), 3.75 - 3.65 (m, 1H), 2.19 - 2.08 (m, 1H), 1.91 - 1.79 (m, 1H), 1.77 - 1.71 (m, 1H).  $^{13}\text{C}$  NMR (101 MHz, Chloroform-*d*)  $\delta$  139.3, 136.1, 129.0, 128.3, 127.1, 124.5, 70.7, 65.3, 64.8, 36.6.

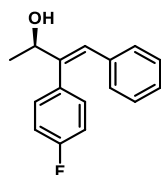

**(R, E)-3-(4-fluorophenyl)-4-phenylbut-3-en-2-ol (4af).** Colorless oil, 24.5 mg, >99% yield; >99% ee;  $[\alpha]_D^{25} = -37.2$  ( $c = 1.00$ ,  $\text{CHCl}_3$ ). HPLC analysis (OD-H, *n*-hexane: isopropanol = 90:10, 0.5 mL/min, 254 nm) indicated >99% ee:  $t_R$  (major) = 14.6 min,  $t_R$  (minor) = 15.5 min.  $^1\text{H}$  NMR (400 MHz, Chloroform-*d*)  $\delta$  7.19 - 6.99 (m, 7H), 6.95 - 6.90 (m, 2H), 6.70 (d,  $J = 1.0$  Hz, 1H), 4.70 - 4.60 (m, 1H), 1.77 (s, 1H), 1.29 (d,  $J = 6.5$  Hz, 3H).  $^{13}\text{C}$  NMR (101 MHz, Chloroform-*d*)  $\delta$  162.2 (d,  $J = 246.4$  Hz), 145.0, 136.4, 134.3 (d,  $J = 3.5$  Hz), 131.0 (d,  $J = 7.8$  Hz), 129.2, 128.0, 126.9, 126.4, 115.7 (d,  $J = 21.3$  Hz), 73.0, 22.1. HRMS(ESI) calcd. for  $\text{C}_{16}\text{H}_{14}\text{F}$  [ $\text{M}-\text{H}_2\text{O}+\text{H}$ ]: 225.1074, found: 225.1067.

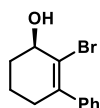

**(R)-2-bromo-3,4,5,6-tetrahydro-[1,1'-biphenyl]-3-ol (4ag).** Yellow solid, 19.2 mg, 80% yield; 98% ee;  $[\alpha]_D^{25} = +50.0$  ( $c = 1.00$ ,  $\text{CHCl}_3$ ). HPLC analysis (OD-H, *n*-hexane: isopropanol = 90:10, 0.5 mL/min, 254 nm) indicated 98% ee:  $t_R$  (minor) = 6.2 min,  $t_R$  (major) = 7.4 min.  $^1\text{H}$

NMR (400 MHz, Chloroform-*d*)  $\delta$  7.41 - 7.28 (m, 3H), 7.25 - 7.19 (m, 2H), 4.42 (s, 1H), 2.51 - 2.30 (m, 3H), 2.04 - 1.89 (m, 3H), 1.83 - 1.73 (m, 1H).  $^{13}\text{C}$  NMR (101 MHz, Chloroform-*d*)  $\delta$  142.3, 141.7, 128.2, 127.6, 127.5, 123.7, 71.1, 34.5, 31.7, 18.6.

#### IV. Gram-scale reaction and transformations of products

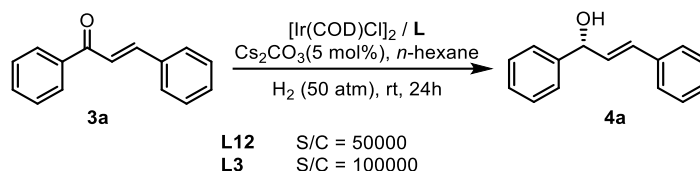

General procedure for S/C = 50 000: To a 2.5 mL vial was added the catalyst precursor  $[\text{Ir}(\text{COD})\text{Cl}]_2$  (1.7 mg, 0.0025 mmol), ligand **L12** (4.4 mg, 0.0055 mmol) and anhydrous *i*-PrOH (2 mL) under argon atmosphere. The mixture was stirred for 1 h at room temperature to give a clear orange solution. An aliquot of the catalyst solution (40  $\mu\text{L}$ , 0.0001 mmol) was transferred into a 50 mL hydrogenation vessel, then  $\text{Cs}_2\text{CO}_3$  (81 mg, 0.25 mmol), chalcone (1.04 g, 5 mmol) and anhydrous *n*-hexane (20 mL) was added. The vessels were placed in an autoclave which was then charged with 50 atm of  $\text{H}_2$  and stirred at 25 - 30  $^\circ\text{C}$  for 48 h. After slowly releasing the hydrogen pressure, the reaction mixture was passed through a short column of silica gel to get the pure product. The product was analyzed by  $^1\text{H}$  NMR to determine the conversion. The ee values were determined by HPLC analysis on a chiral stationary phase.

General procedure for S/C = 100 000: To a 2.5 mL vial was added the catalyst precursor  $[\text{Ir}(\text{COD})\text{Cl}]_2$  (1.7 mg, 0.0025 mmol), ligand **L3** (3.1 mg, 0.0055 mmol) and anhydrous *i*-PrOH (2 mL) under argon atmosphere. The mixture was stirred for 1 h at room temperature to give a clear orange solution. An aliquot of the catalyst solution (20  $\mu\text{L}$ , 0.00005 mmol) was transferred into a 50 mL hydrogenation vessel, then  $\text{Cs}_2\text{CO}_3$  (81 mg, 0.25 mmol), chalcone (1.04 g, 5 mmol) and anhydrous *n*-hexane (20 mL) was added. The vessels were placed in an autoclave which was then charged with 50 atm of  $\text{H}_2$  and stirred at 25 - 30  $^\circ\text{C}$  for 48 h. After slowly releasing the hydrogen pressure, the reaction mixture was passed through a short column of silica gel to get the pure product. The product was analyzed by  $^1\text{H}$  NMR to determine the conversion. The ee values were determined by HPLC analysis on a chiral stationary phase.



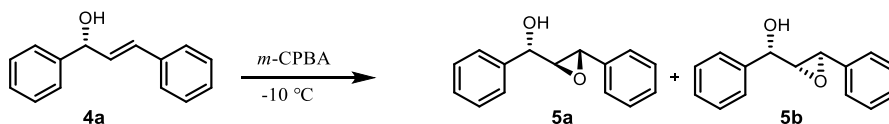

To a solution of **4a** (0.10 mmol, 1.00 eq.) in DCM (2 mL) at 0 °C was added *m*-chloroperbenzoic acid (0.20 mmol, 2.00 eq.). After 0.5 h, the resulting solution was stirred at room temperature for 24 h until complete consumption of starting material (verified by TLC). The mixture was washed with 10% solution of Na<sub>2</sub>CO<sub>3</sub> (5 mL) and then extracted with DCM (2 mL). The organic layer was dried (Na<sub>2</sub>SO<sub>4</sub>) and the solvent was removed under reduced pressure. The crude product was purified by flash chromatography on SiO<sub>2</sub> to afford product **5** (212.5 mg, 94% yield) as Colorless oil.<sup>4</sup> Mixture of two diastereoisomers that could not be separated by flash chromatography. As mixture of both diastereoisomers **5a** and **5b**. Major diastereoisomer(**5a**): <sup>1</sup>H NMR (400 MHz, Chloroform-*d*) δ 2.50 (m, 1H), 3.31 (dd, 2.9 Hz, 2.2 Hz, 1H), 4.16 (d, *J* = 2.1 Hz, 1H), 5.02 (d, *J* = 2.9 Hz, 1H), 7.26 - 7.31 (m, 2H), 7.31 - 7.38 (m, 4H), 7.38 - 7.44 (m, 2H), 7.44 - 7.53 (m, 2H). <sup>13</sup>C NMR (101 MHz, Chloroform-*d*) δ 54.9, 64.9, 71.1, 125.7, 126.5, 128.3, 128.4, 128.5, 128.7, 136.5, 139.1. HPLC (Chiralcel AD - H, *n*-hexane: isopropanol = 95:05, 1 mL/min, λ = 220 nm) indicated 96% ee : t<sub>R</sub> = 30.1 min, t<sub>R</sub> = 31.8 min. Minor diastereoisomer (**5b**): <sup>1</sup>H NMR (400 MHz, Chloroform-*d*) δ 2.58 (m, 1H), 3.32 (dd, 4.8 Hz, 2.2 Hz, 1H), 4.03(d, *J* = 2.1 Hz, 1H), 4.74 (d, *J* = 4.7 Hz, 1H), 7.26 - 7.31 (m, 2H), 7.31 - 7.38 (m, 4H), 7.38 - 7.44 (m, 2H), 7.44 - 7.53 (m, 2H). <sup>13</sup>C NMR (101 MHz, Chloroform-*d*) δ 56.8, 65.7, 73.3, 125.7, 126.2, 128.1, 128.3, 128.4, 128.6, 136.2, 140.1. HPLC (Chiralcel AD - H, *n*-hexane: isopropanol = 95:05, 1 mL/min, λ = 220 nm) indicated 96% ee : t<sub>R</sub> = 21.1 min, t<sub>R</sub> = 27.2 min.

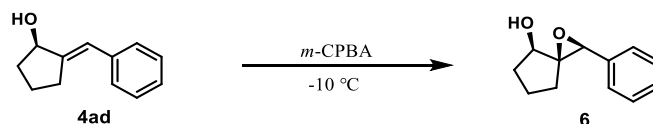

To a solution of **4ad** (0.10 mmol) in DCM (2 mL) at 0 °C was added *m*-chloroperbenzoic acid (0.20 mmol). After 0.5 h, the resulting solution was stirred at room temperature for 24 h until complete consumption of starting material (verified by TLC). The mixture was washed with an 10% solution of Na<sub>2</sub>CO<sub>3</sub> (5 mL) and then extracted with DCM (2 mL). The organic

layer was dried ( $\text{Na}_2\text{SO}_4$ ) and the solvent was removed under reduced pressure. The crude product was purified by flash chromatography on  $\text{SiO}_2$  to afford product **6** (146.5 mg, 77% yield) as colorless oil<sup>6</sup>.  $^1\text{H}$  NMR (400 MHz, Chloroform-*d*)  $\delta$  7.47 - 7.13 (m, 5H), 4.16 - 3.93 (m, 2H), 2.27 (s, 1H), 2.12 - 2.00 (m, 1H), 1.92 - 1.76 (m, 2H), 1.75 - 1.59 (m, 2H), 1.51 - 1.38 (m, 1H).  $^{13}\text{C}$  NMR (101 MHz, Chloroform-*d*)  $\delta$  135.7, 128.2, 127.8, 126.1, 72.3, 72.2, 61.7, 33.9, 25.7, 19.4. HPLC (Chiralcel AD - H, *n*-hexane: isopropanol = 95:05, 1 mL/min,  $\lambda$  = 220 nm) indicated 99% ee :  $t_{\text{R}}$  = 13.0 min,  $t_{\text{R}}$  = 14.9 min.

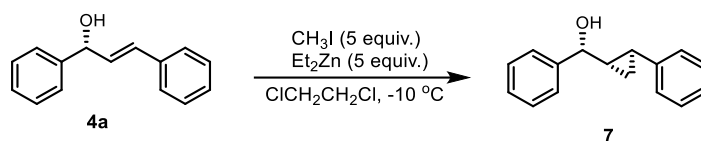

$\text{Et}_2\text{Zn}$  (1.00 M in heptane, 4.16 mmol, 5.00 eq.) was dissolved in anhydrous  $(\text{CH}_2\text{Cl})_2$  (3.00 mL) and cooled to  $-10\text{ }^\circ\text{C}$ .  $\text{CH}_2\text{I}_2$  (4.16 mmol, 5.00 eq.) was added and the reaction mixture was stirred for 5 min at  $-10\text{ }^\circ\text{C}$ . Racemic enol **4a** (0.83 mmol, 1.00 eq.) was added and the reaction mixture was stirred for 16 h, while warming up to rt. A saturated aqueous  $\text{Na}_2\text{CO}_3$  solution (10 mL) was added and the aqueous layer was extracted with ethyl acetate ( $3 \times 20$  mL). The combined organic layers were washed with water and saturated aqueous  $\text{NaCl}$  solution (10 mL), dried over anhydrous  $\text{Na}_2\text{SO}_4$  and the solvent was removed under reduced pressure. The residue was purified by chromatography PE/EtOAc (10/1) to afford product **7** (136.8 mg, 61%) as colorless oil<sup>5</sup>.  $^1\text{H}$  NMR (400 MHz, Chloroform-*d*)  $\delta$  7.60 - 6.83 (m, 10H), 4.35 (d,  $J = 7.4$  Hz, 1H), 2.07 (s, 1H), 2.02 - 1.94 (m, 1H), 1.57 - 1.49 (m, 1H), 1.20 - 1.13 (m, 1H), 1.08 - 0.98 (m, 1H).  $^{13}\text{C}$  NMR (101 MHz, Chloroform-*d*)  $\delta$  143.5, 142.0, 128.4, 128.3, 127.6, 126.1, 126.0, 125.6, 76.7, 30.0, 21.0, 13.6. HPLC (Chiralcel AD - H, *n*-hexane: isopropanol = 95:05, 1 mL/min,  $\lambda$  = 220 nm) indicated 96% ee :  $t_{\text{R}}$  = 13.7 min,  $t_{\text{R}}$  = 18.0 min.



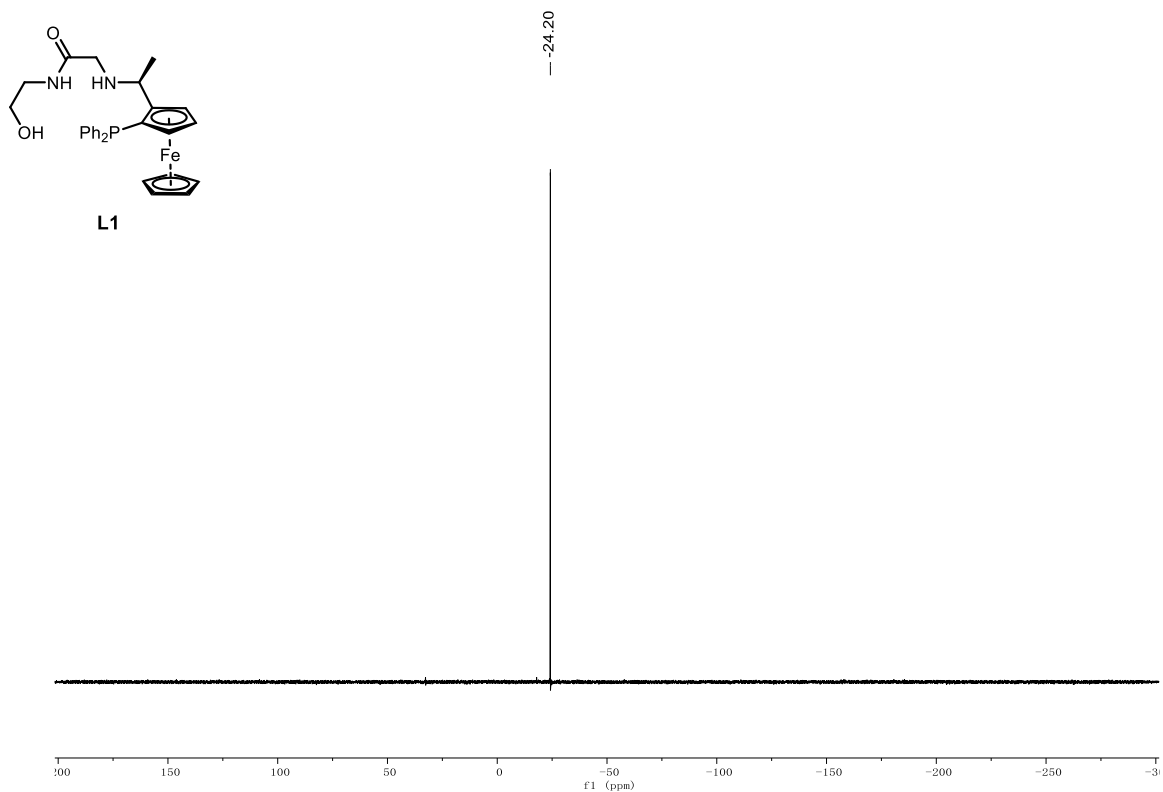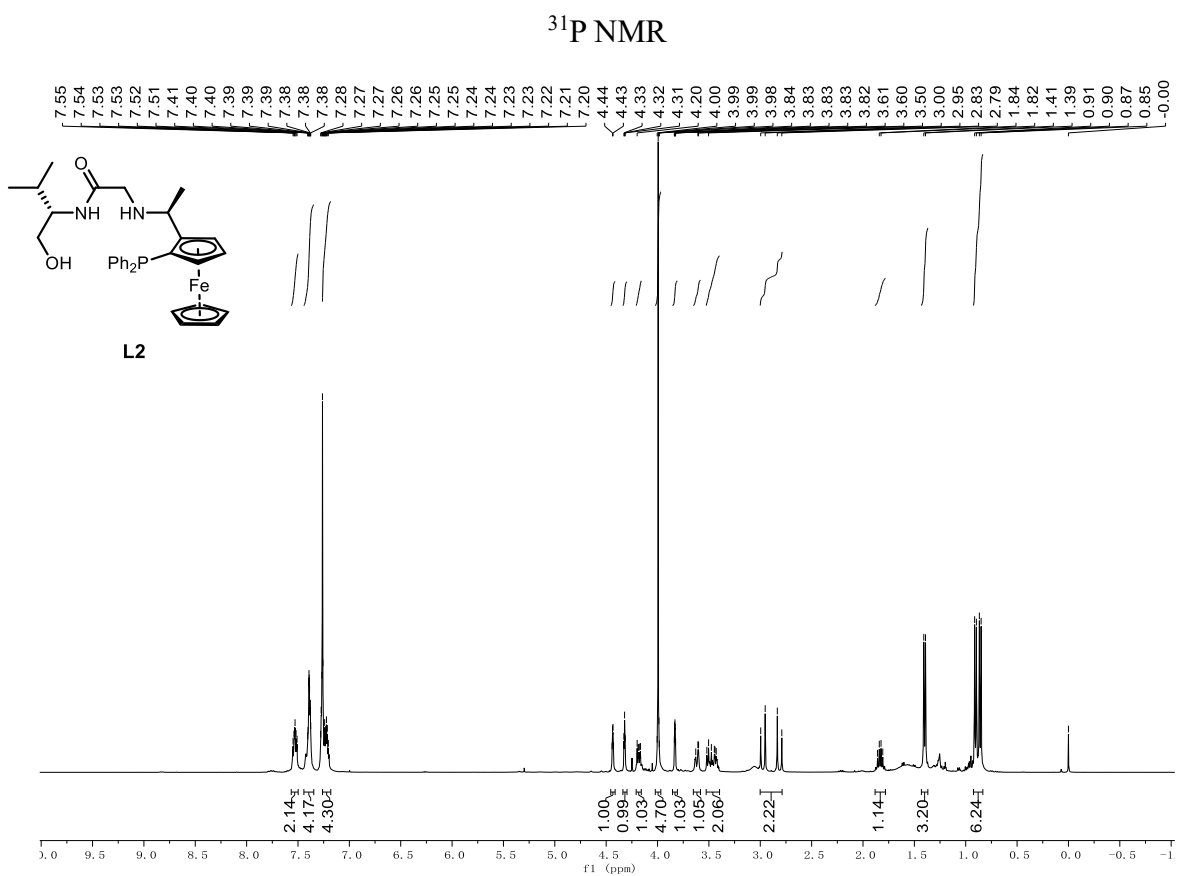

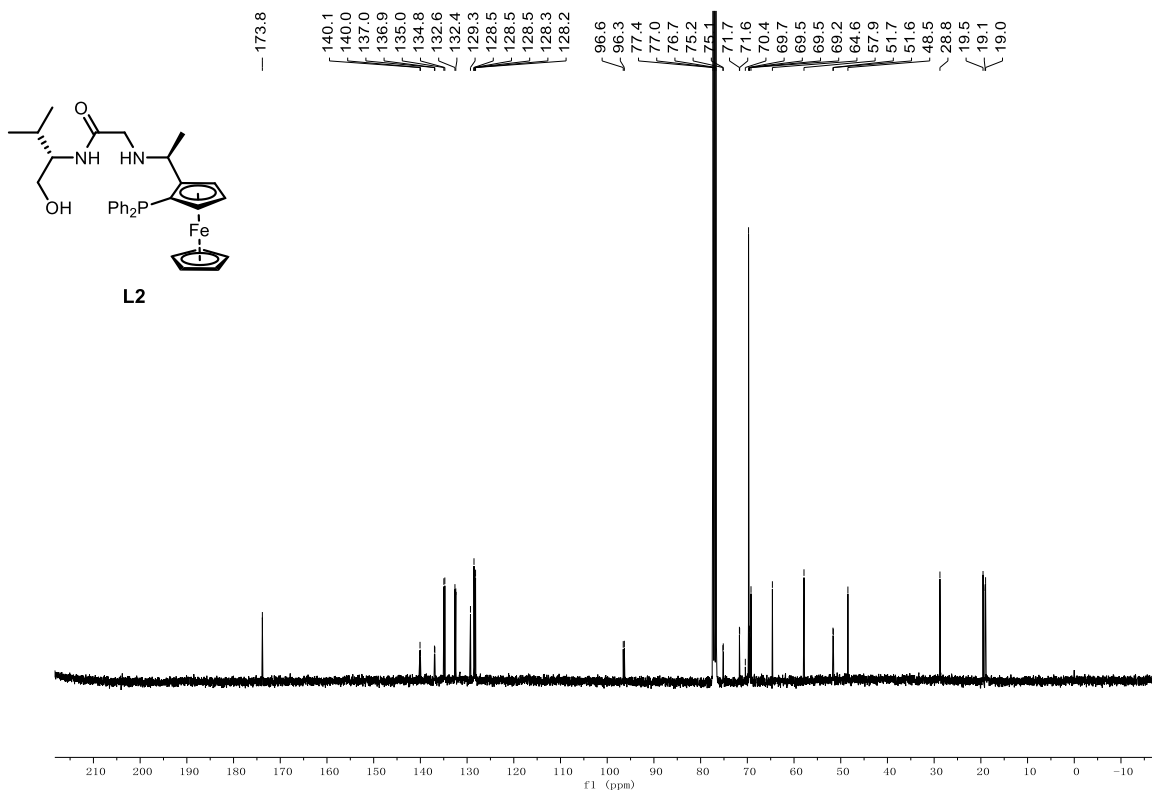

$^{13}\text{C}$  NMR

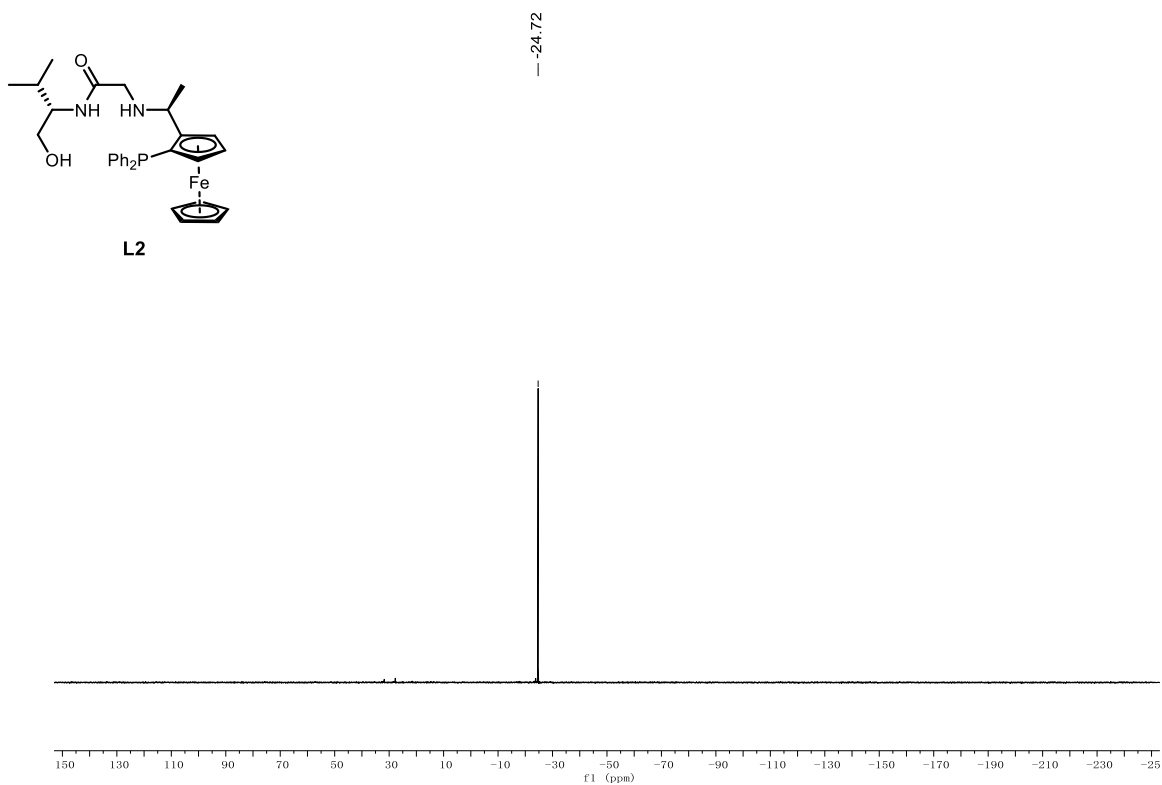

$^{31}\text{P}$  NMR

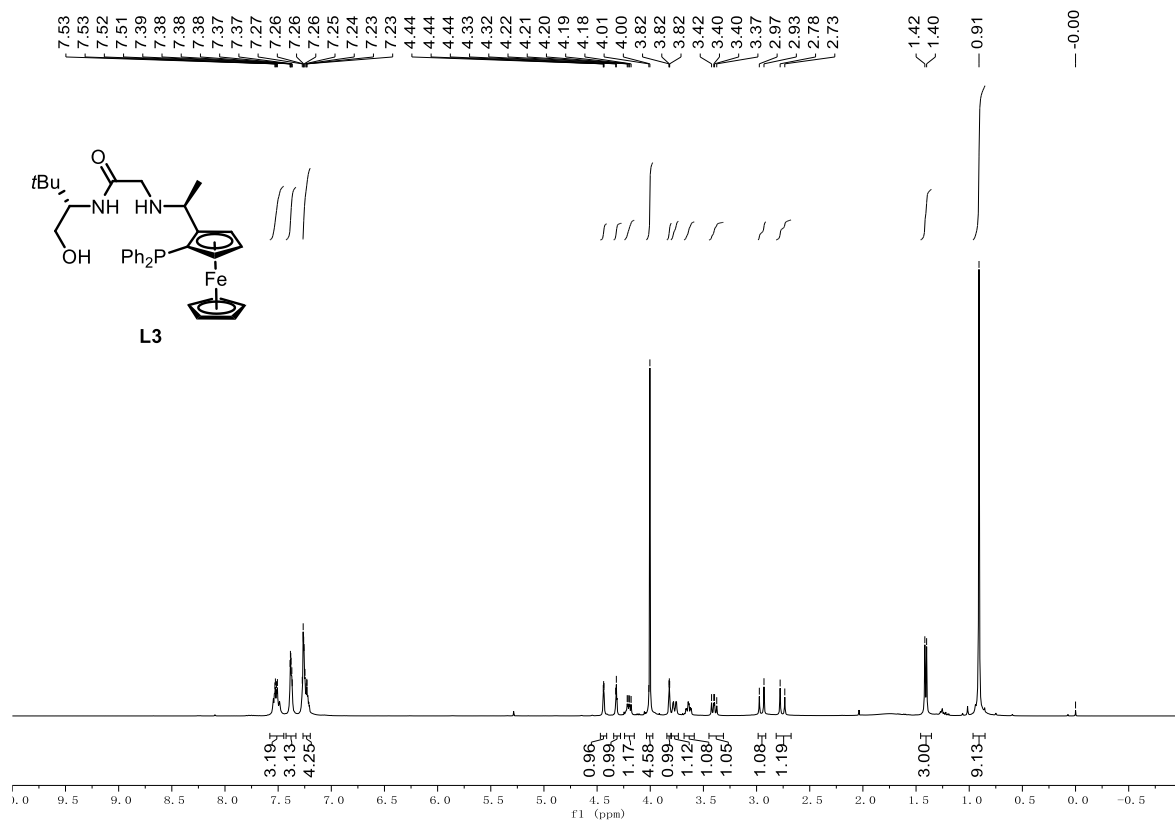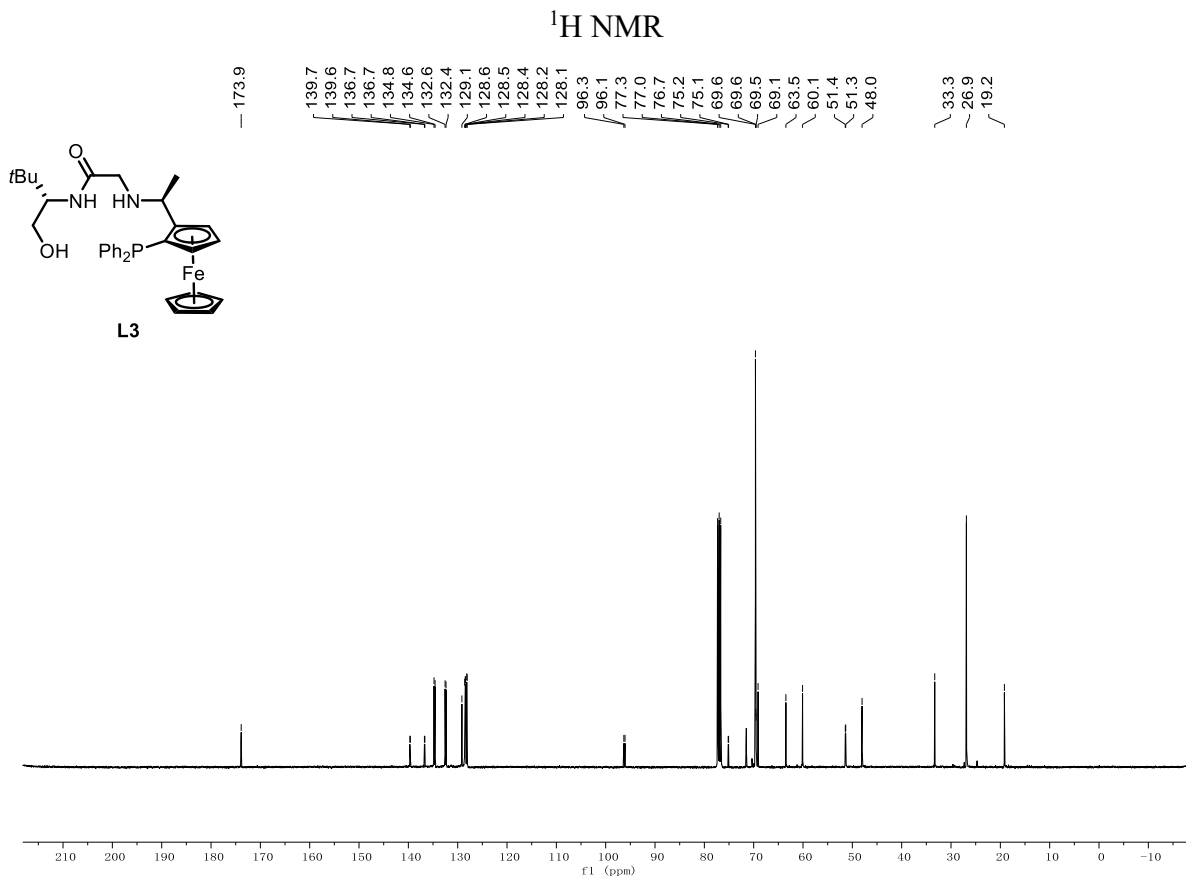

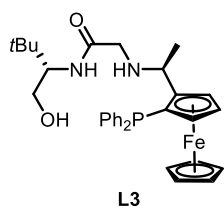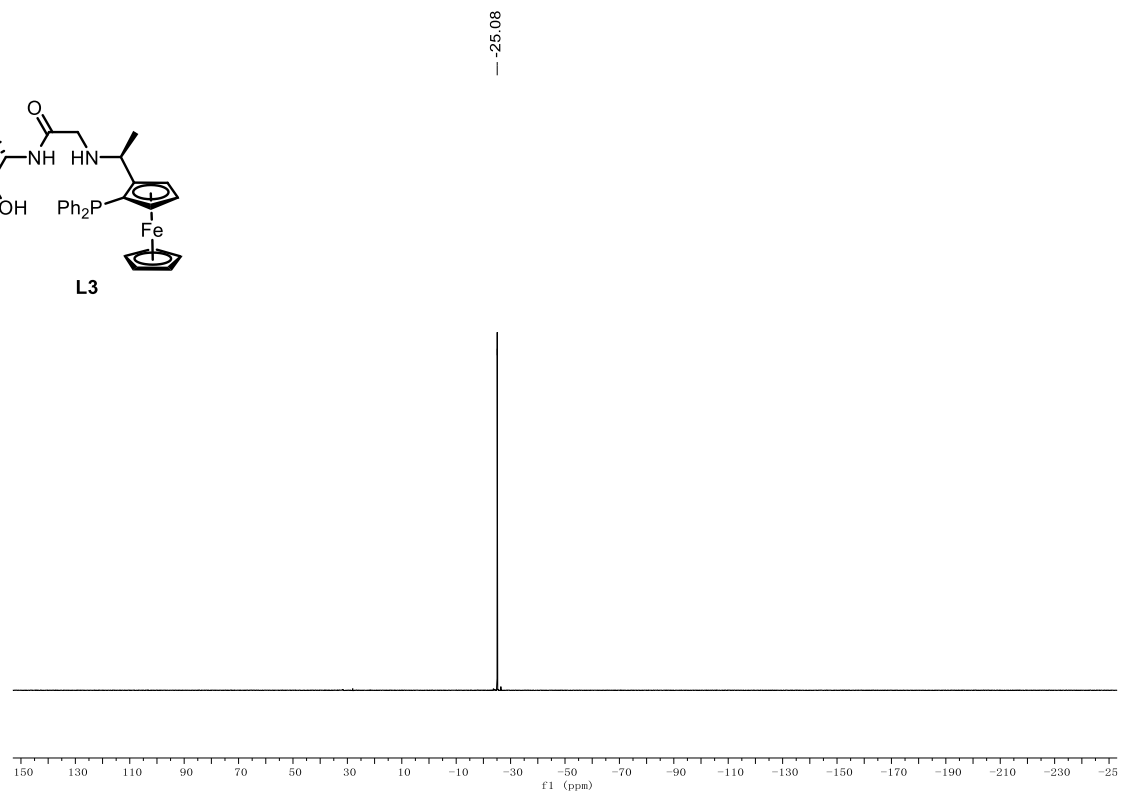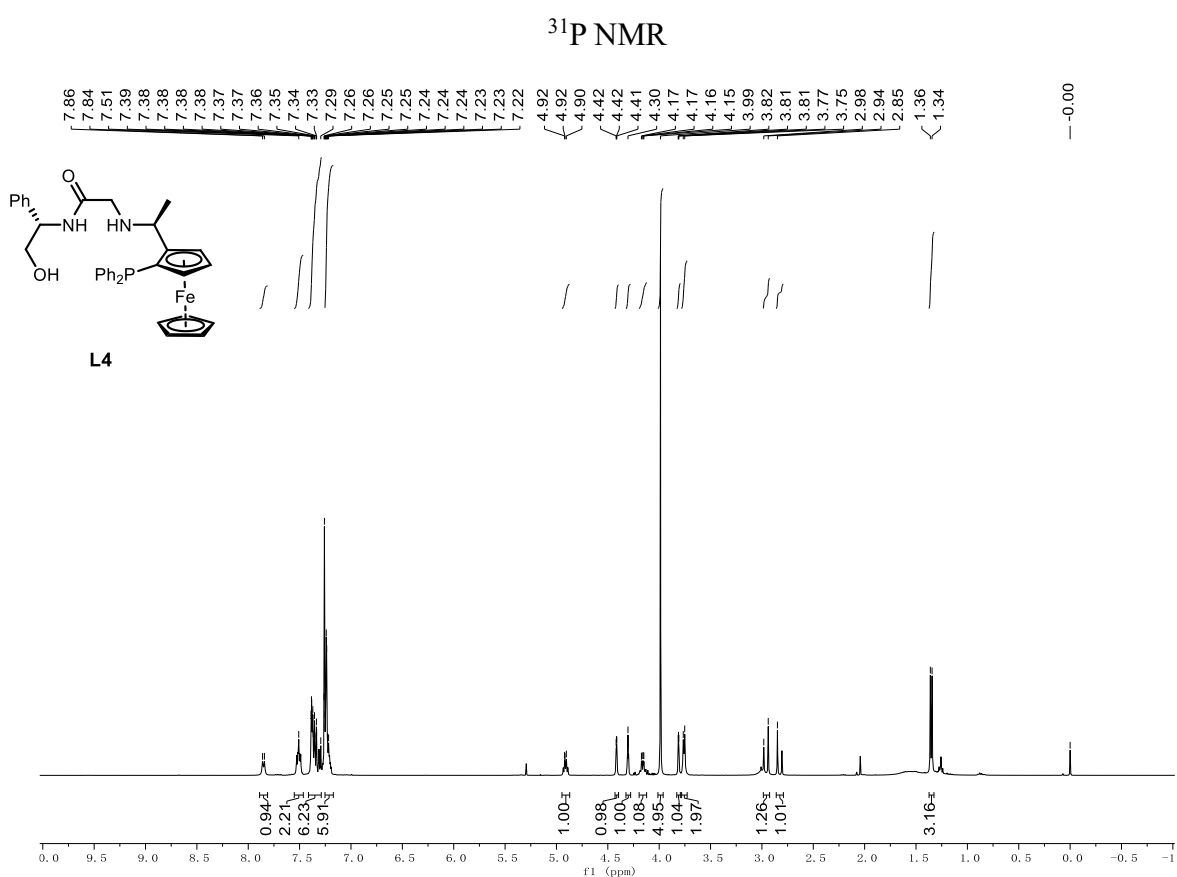

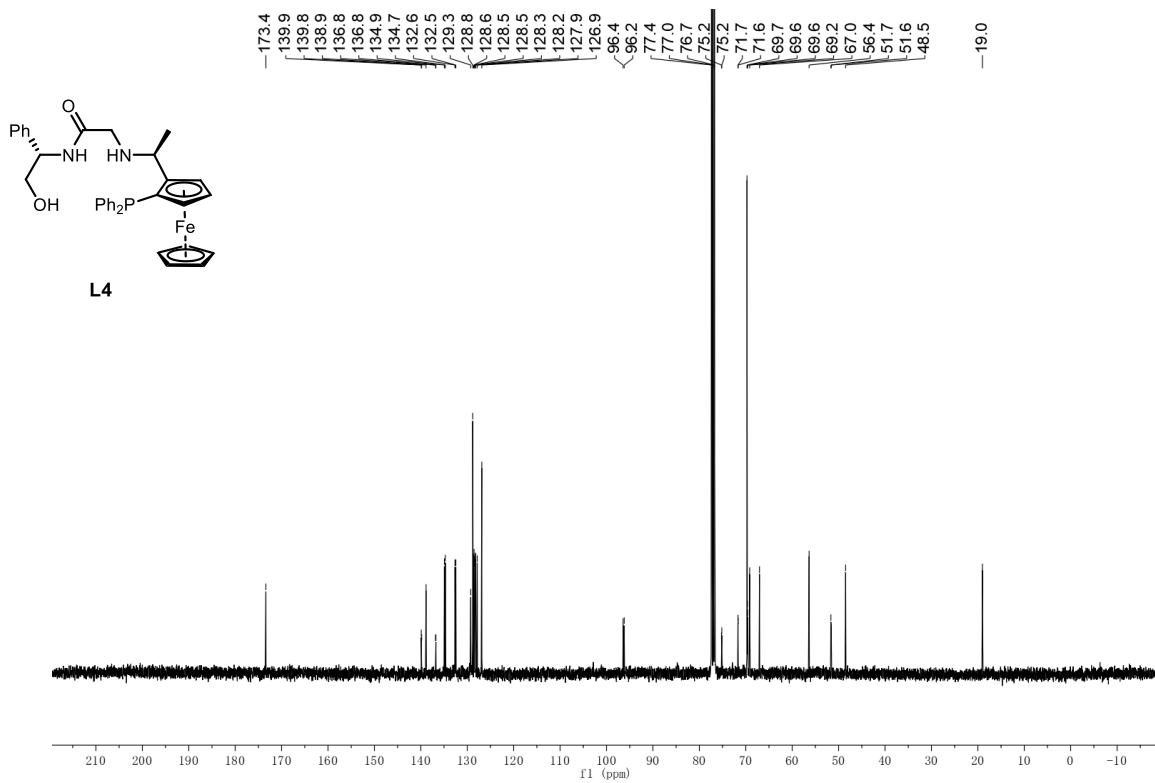

$^{13}\text{C}$  NMR

-24.77

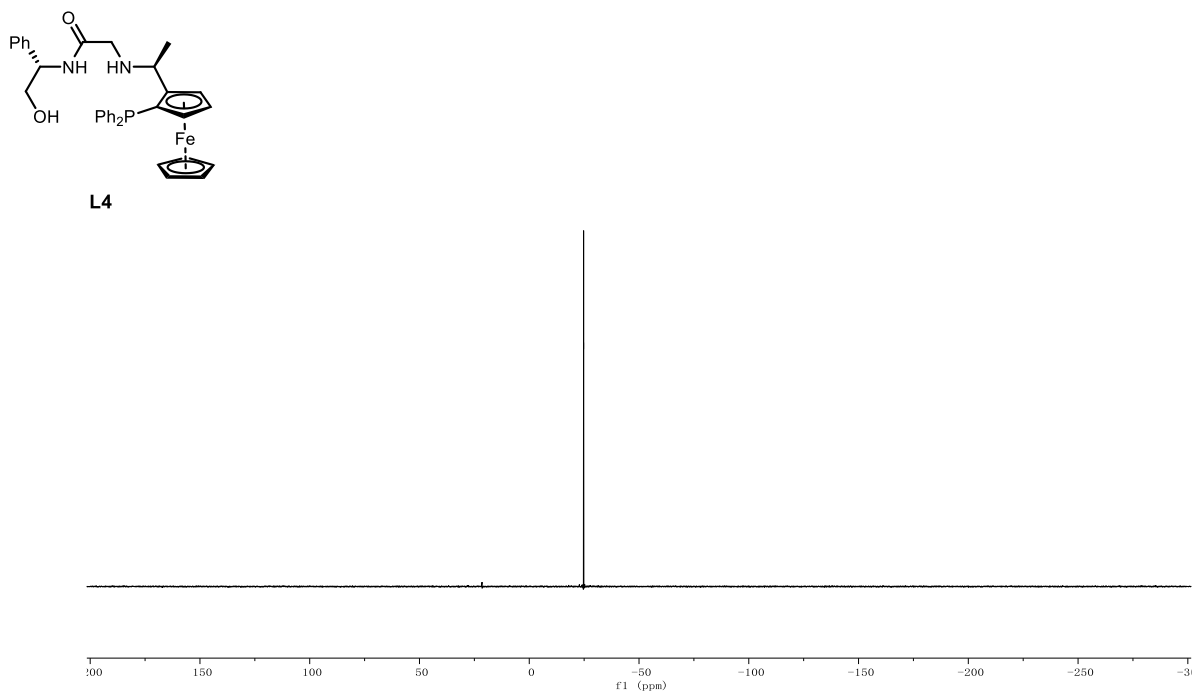

$^{31}\text{P}$  NMR



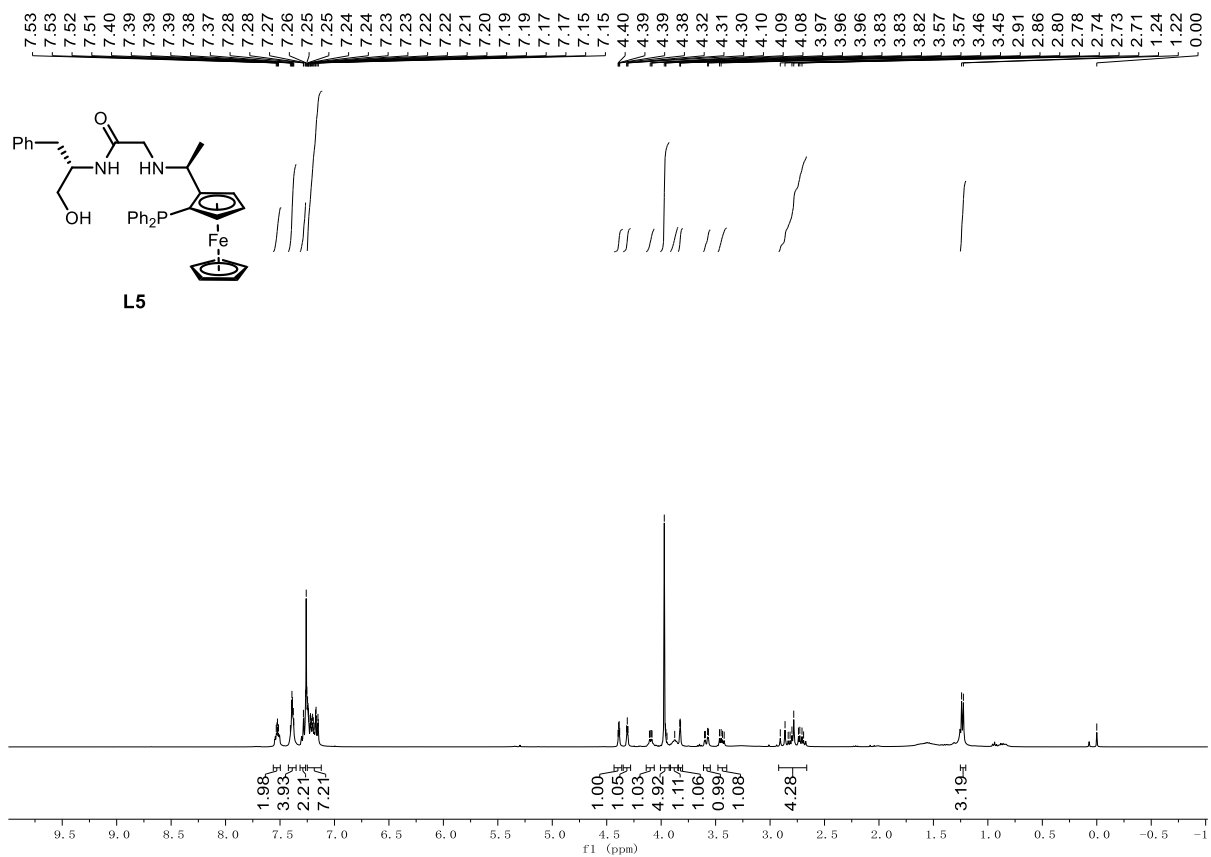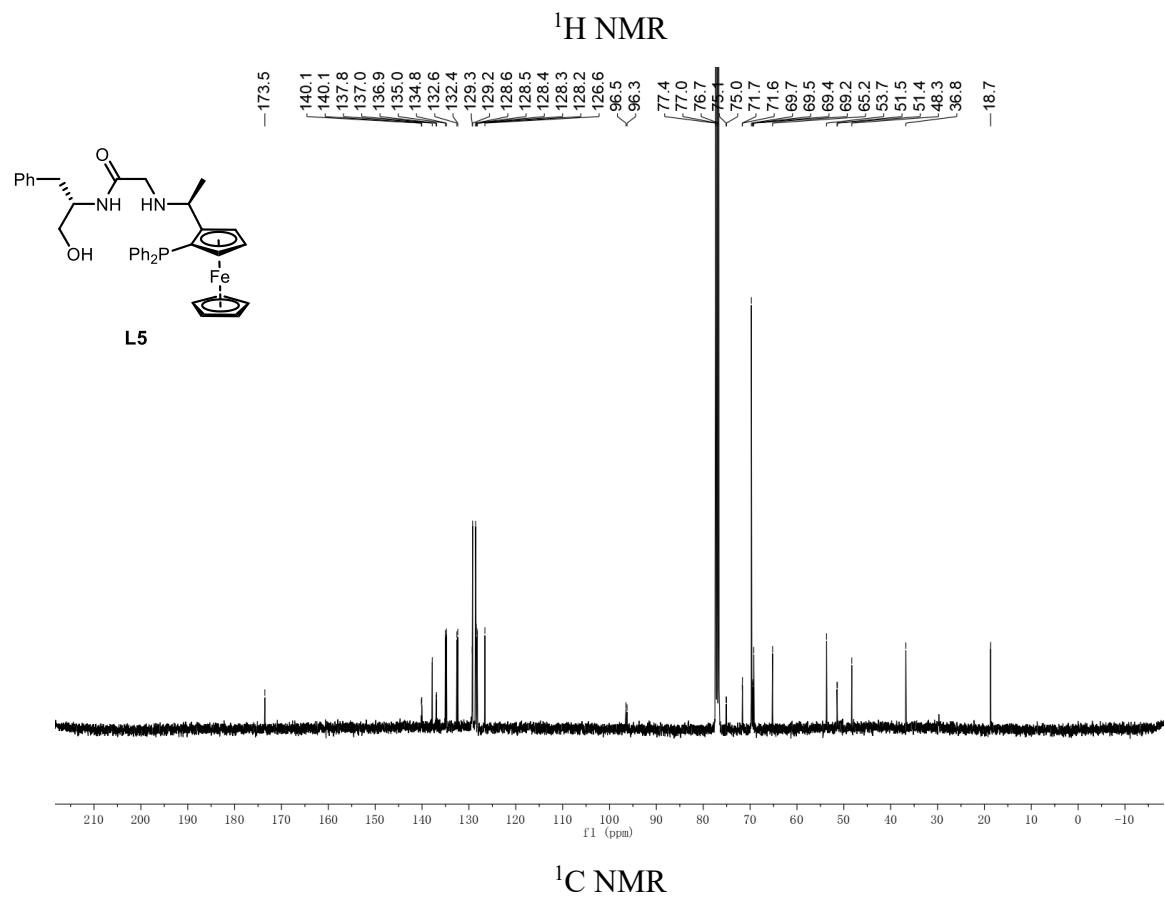

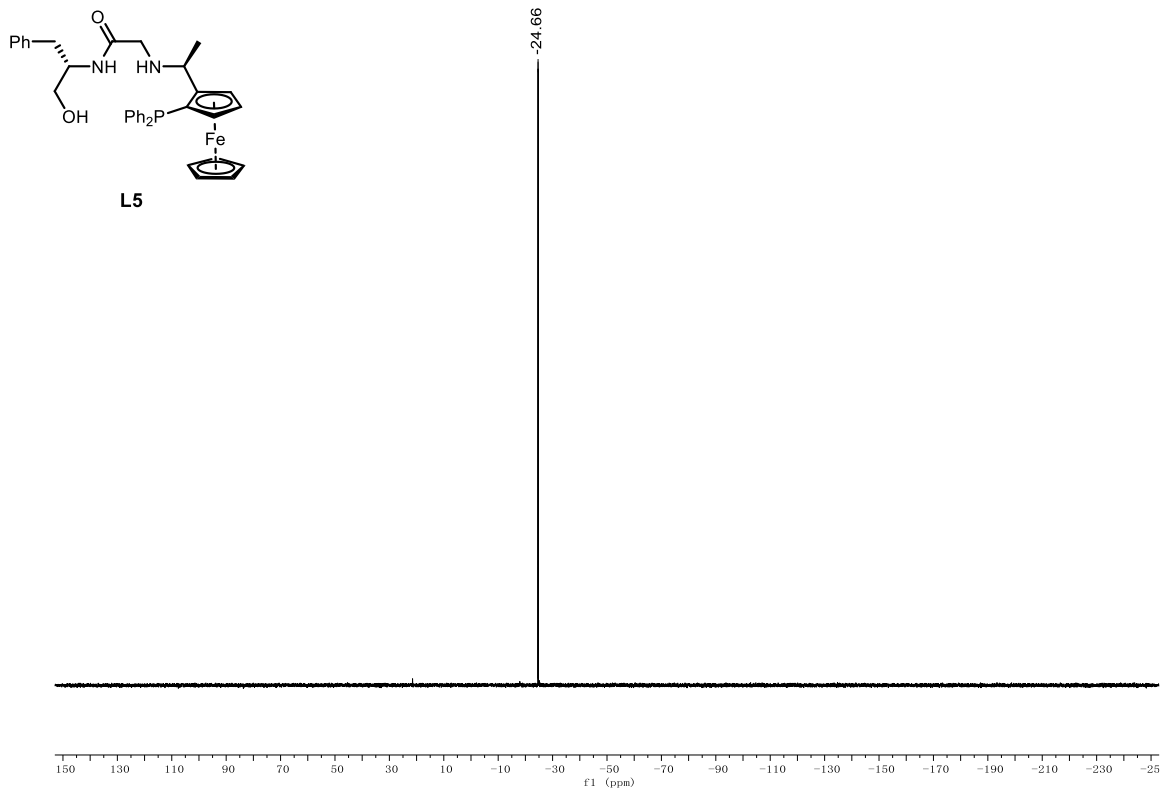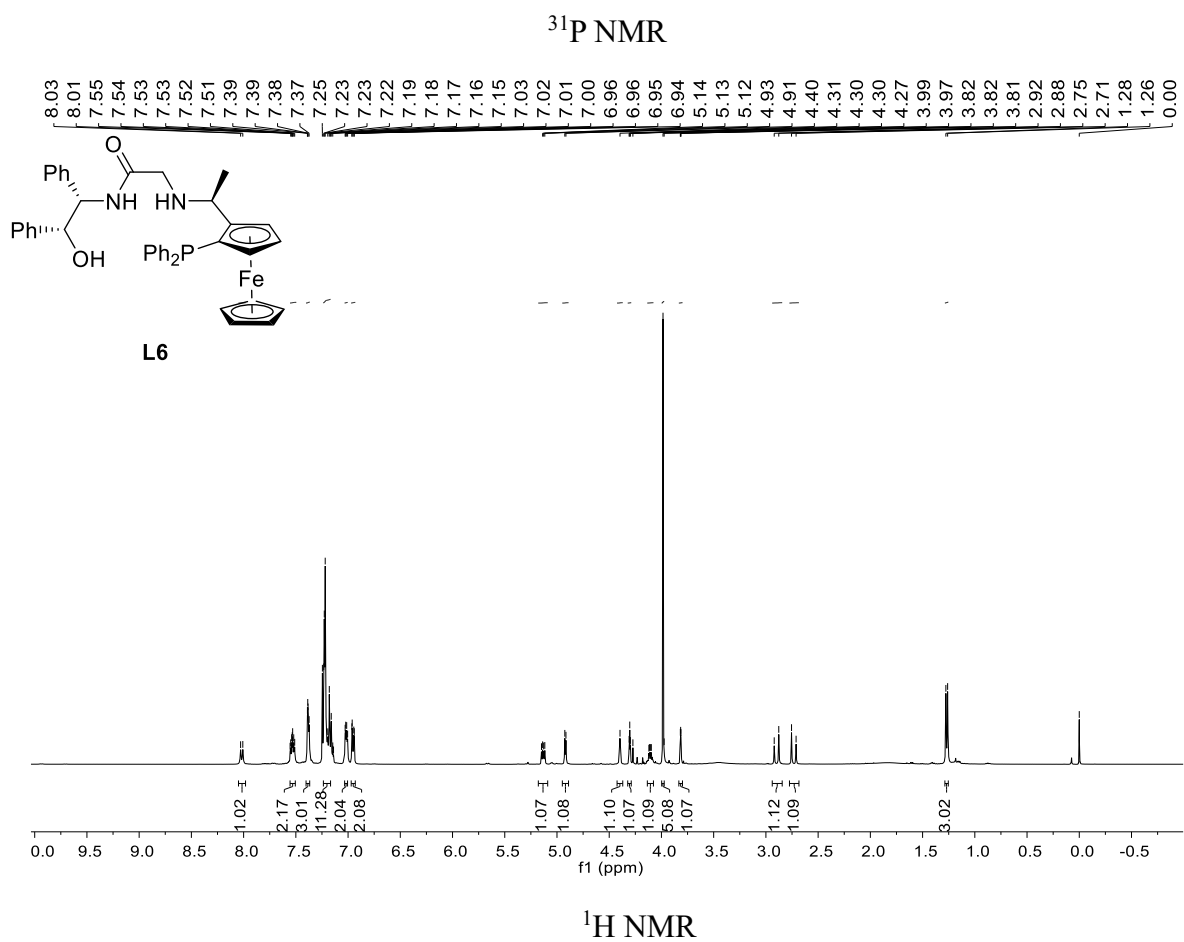

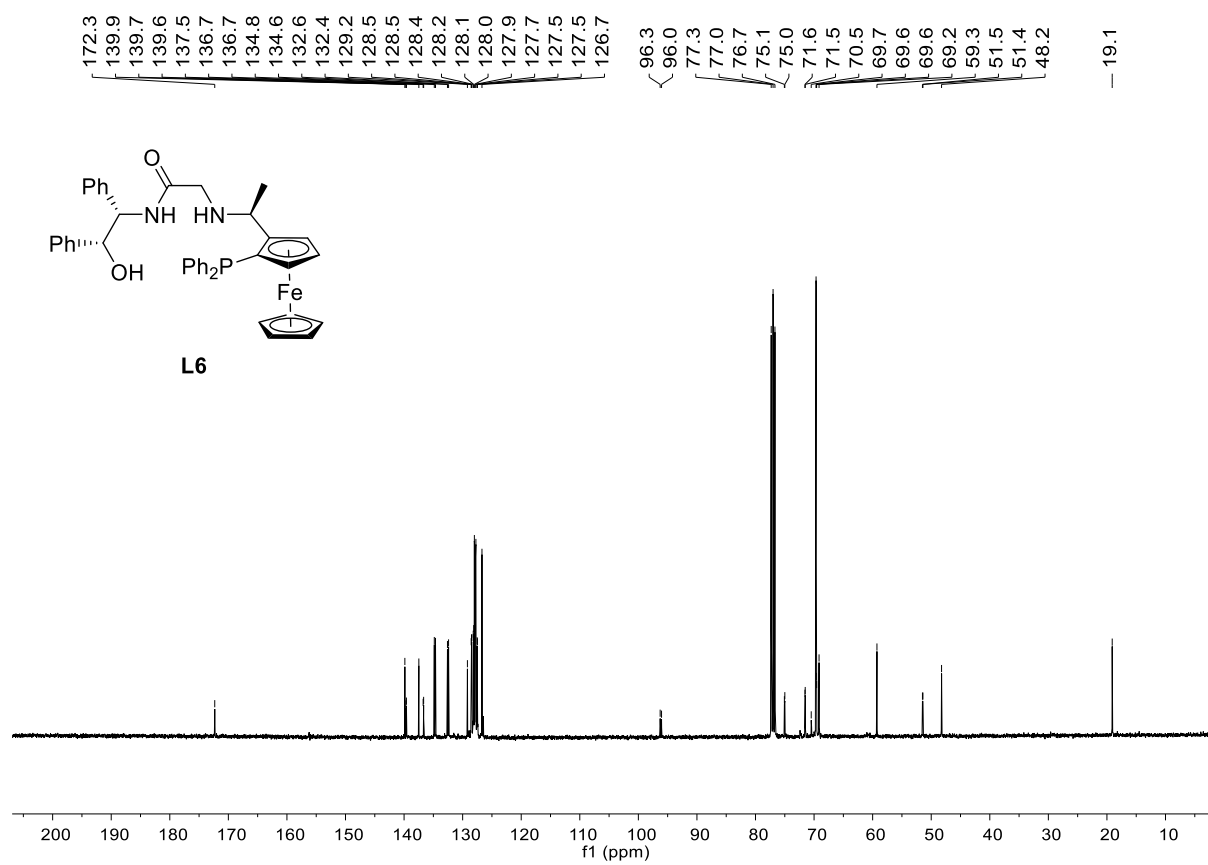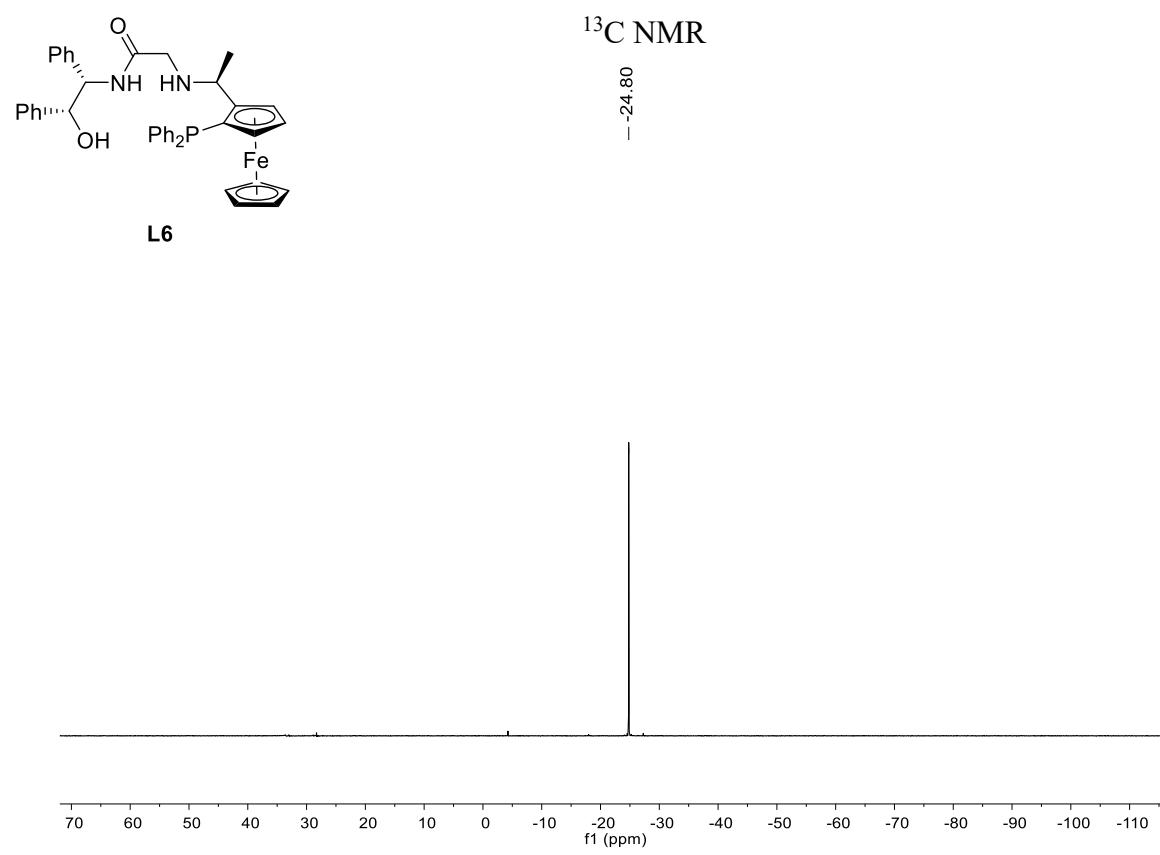

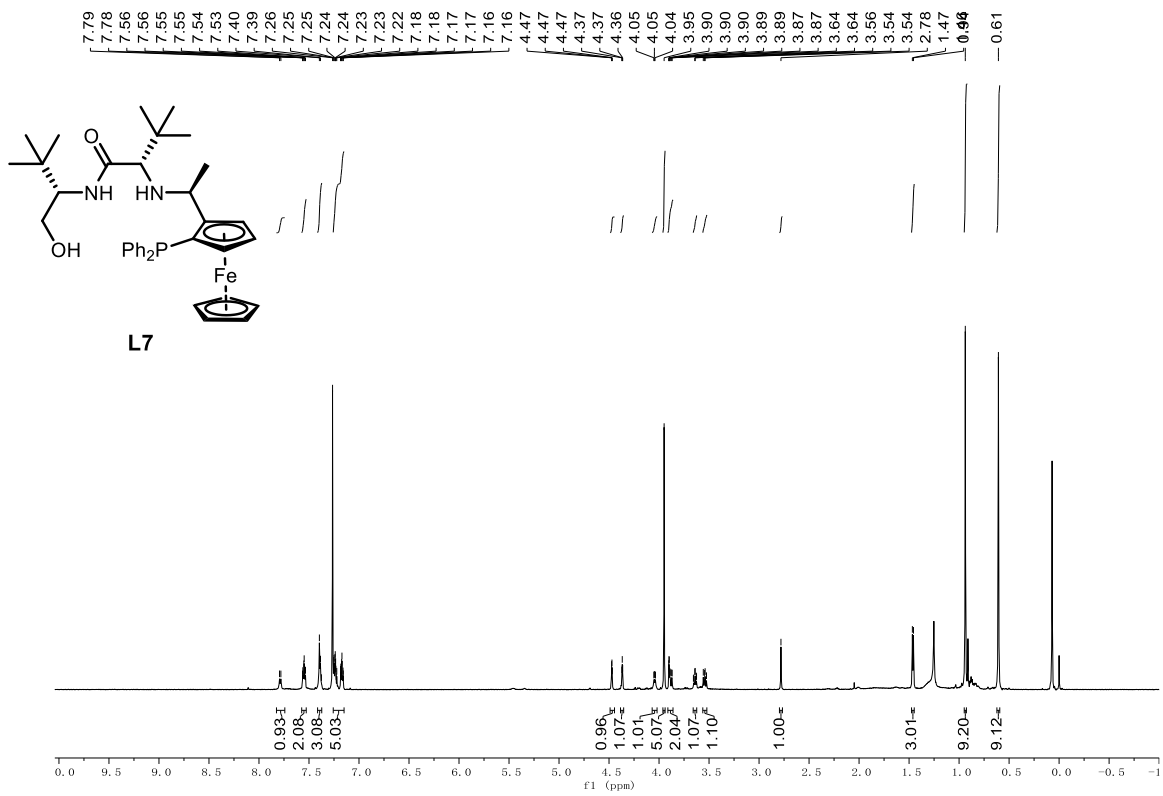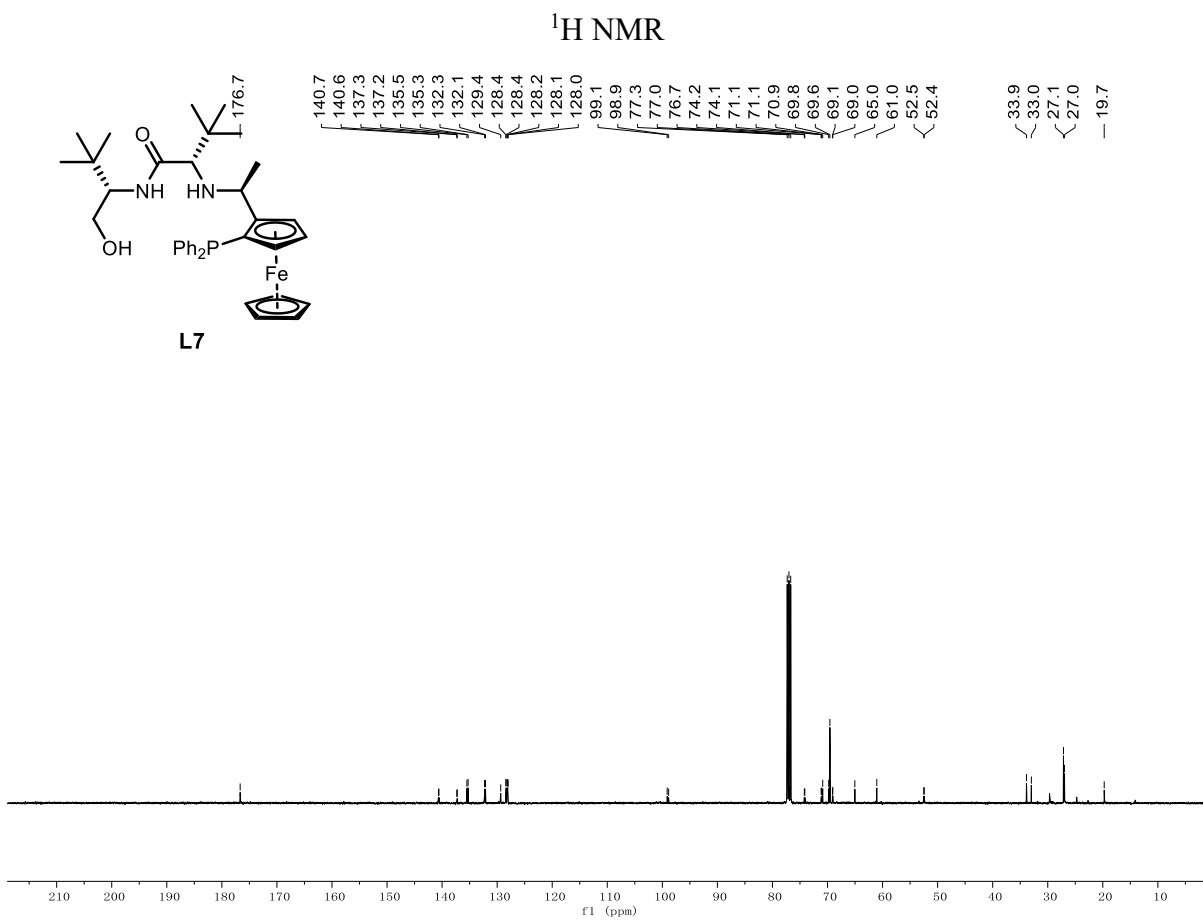

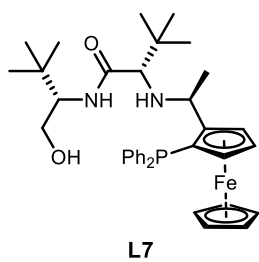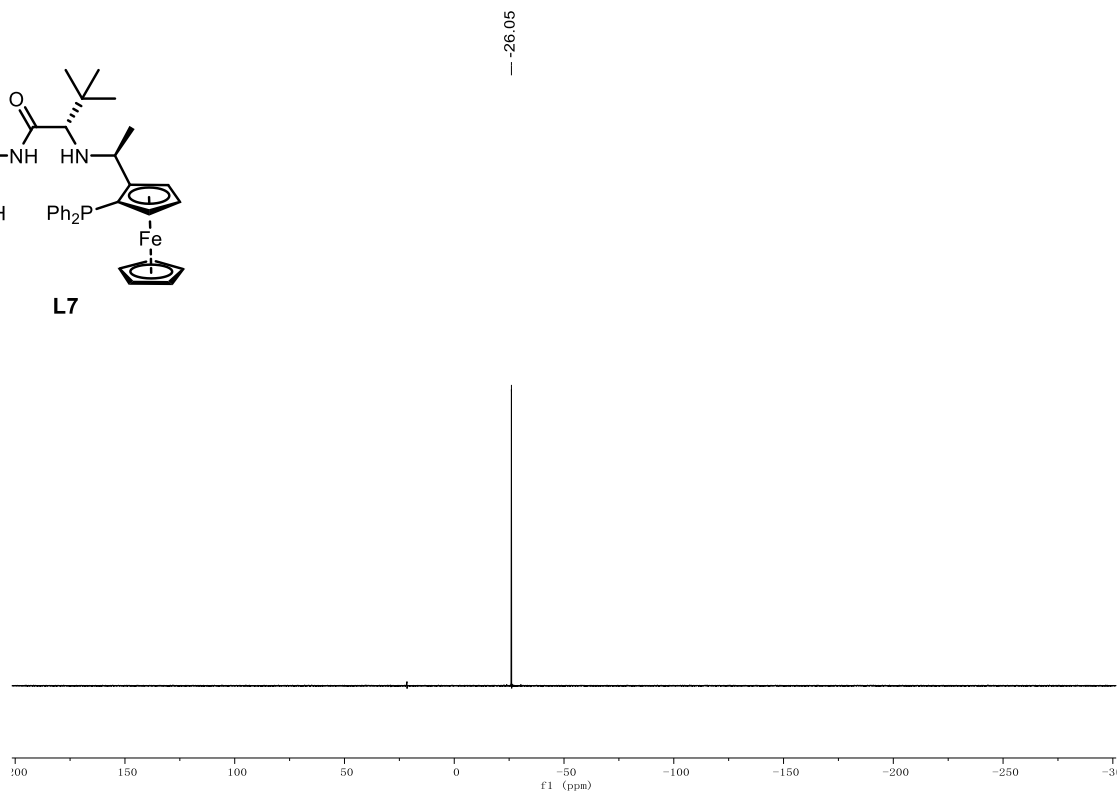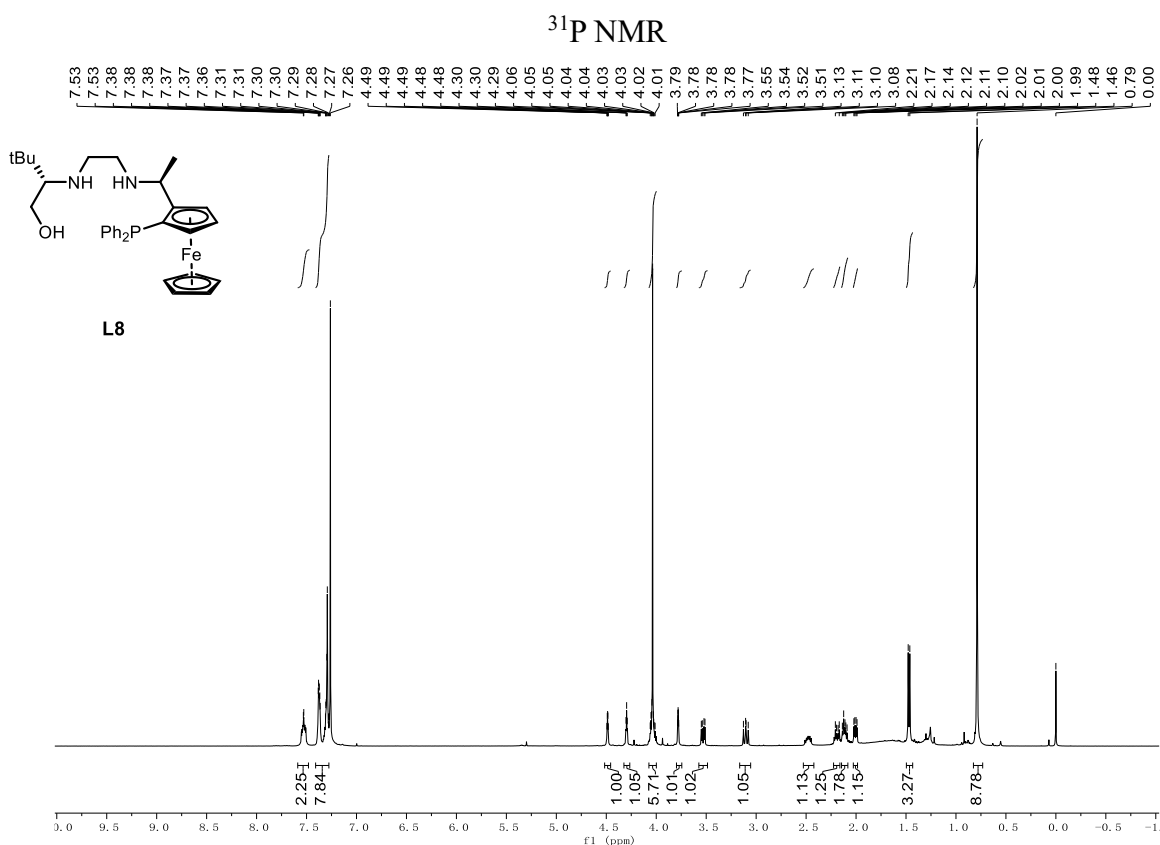

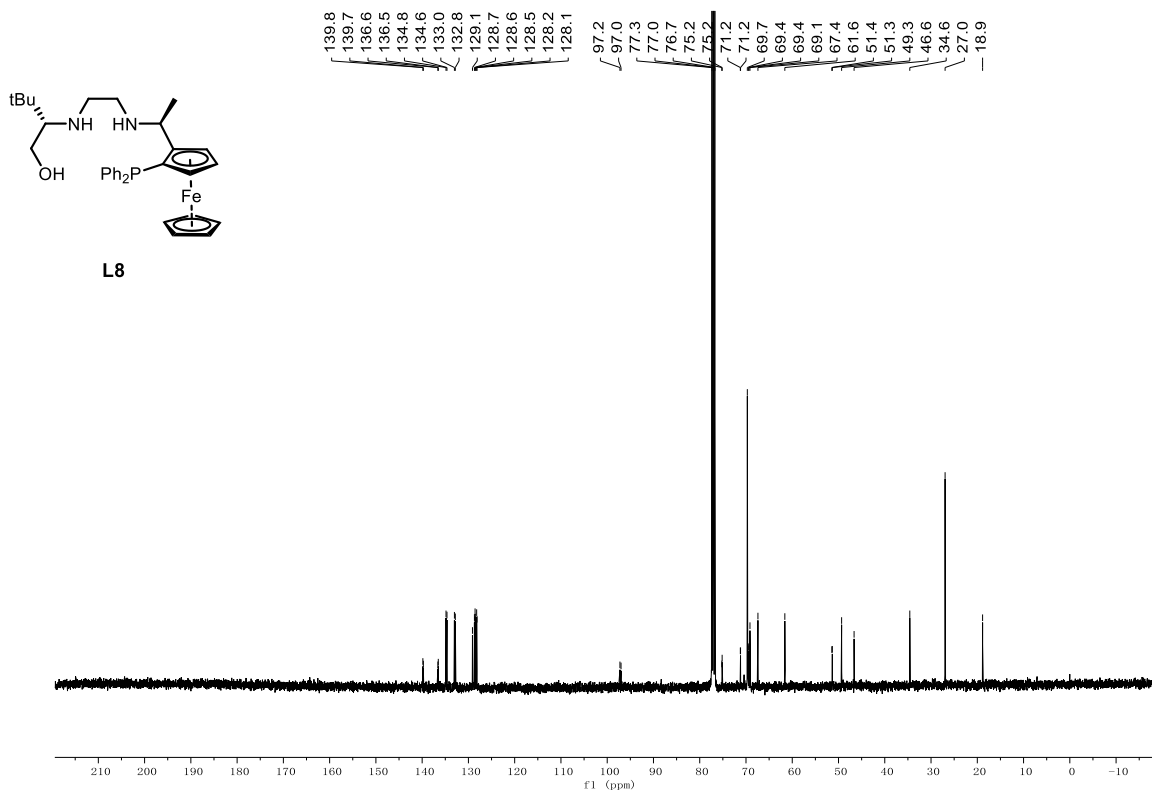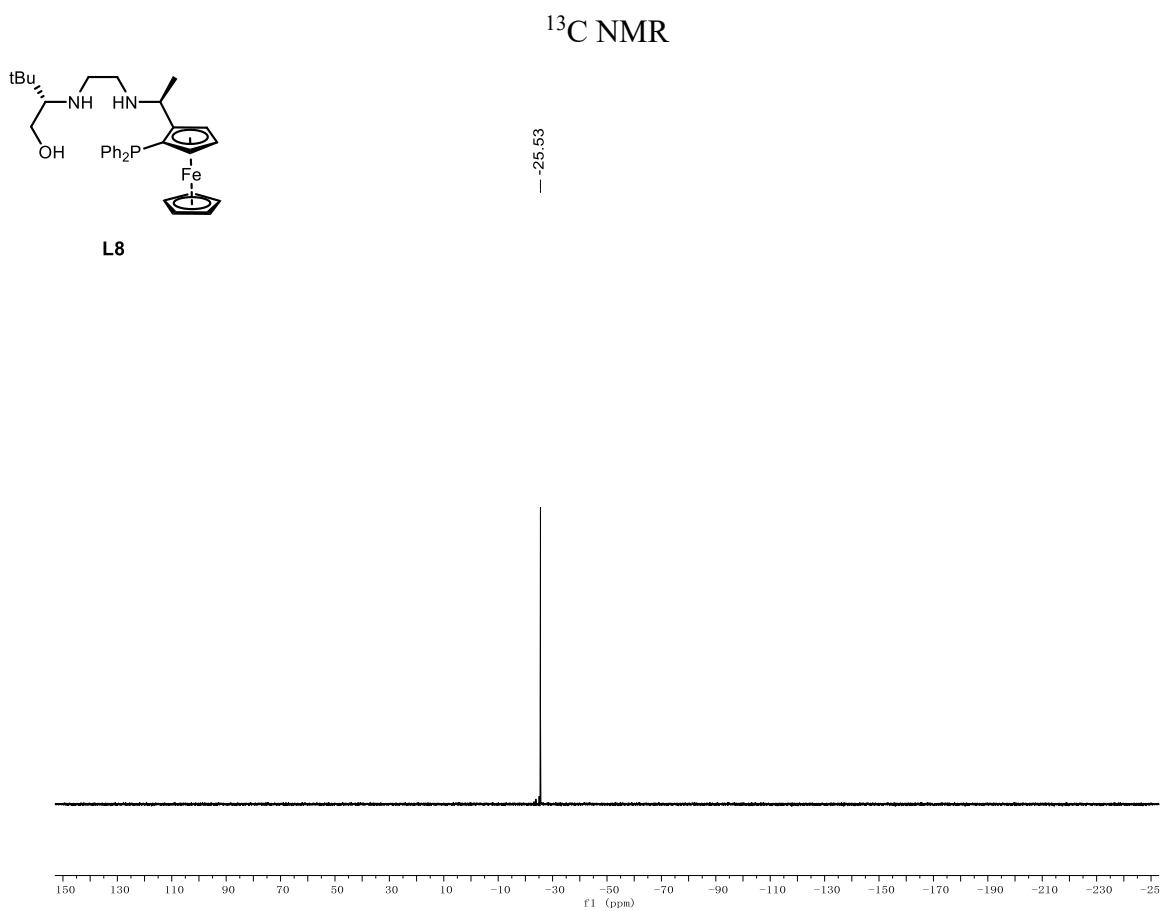

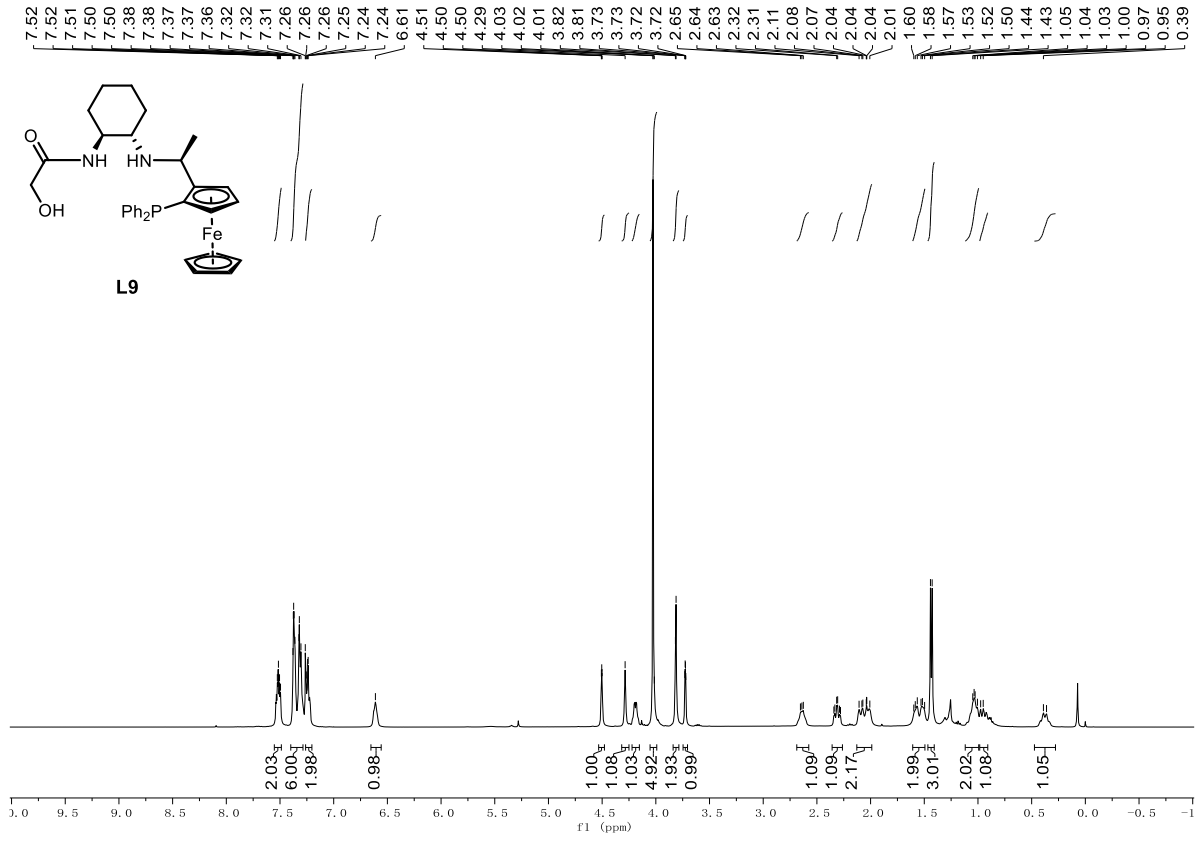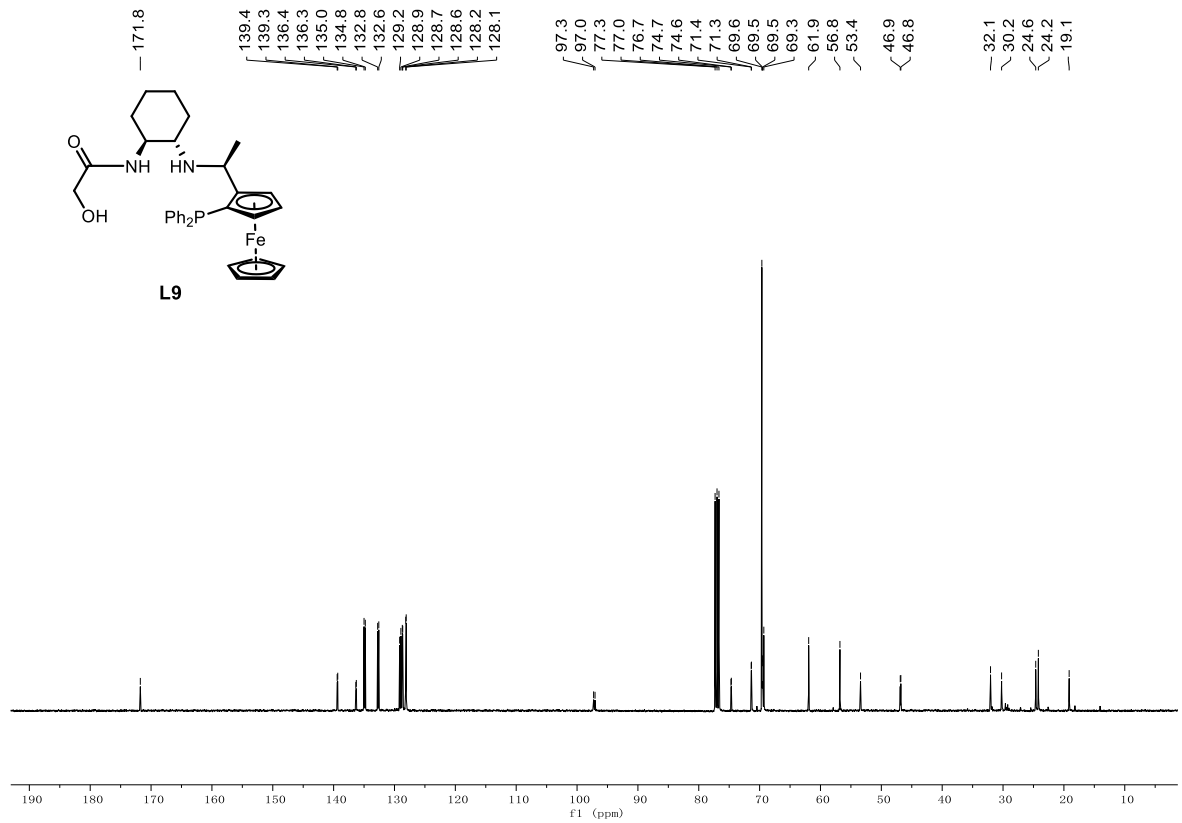

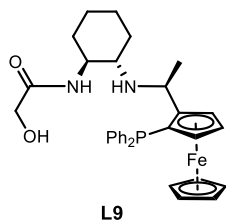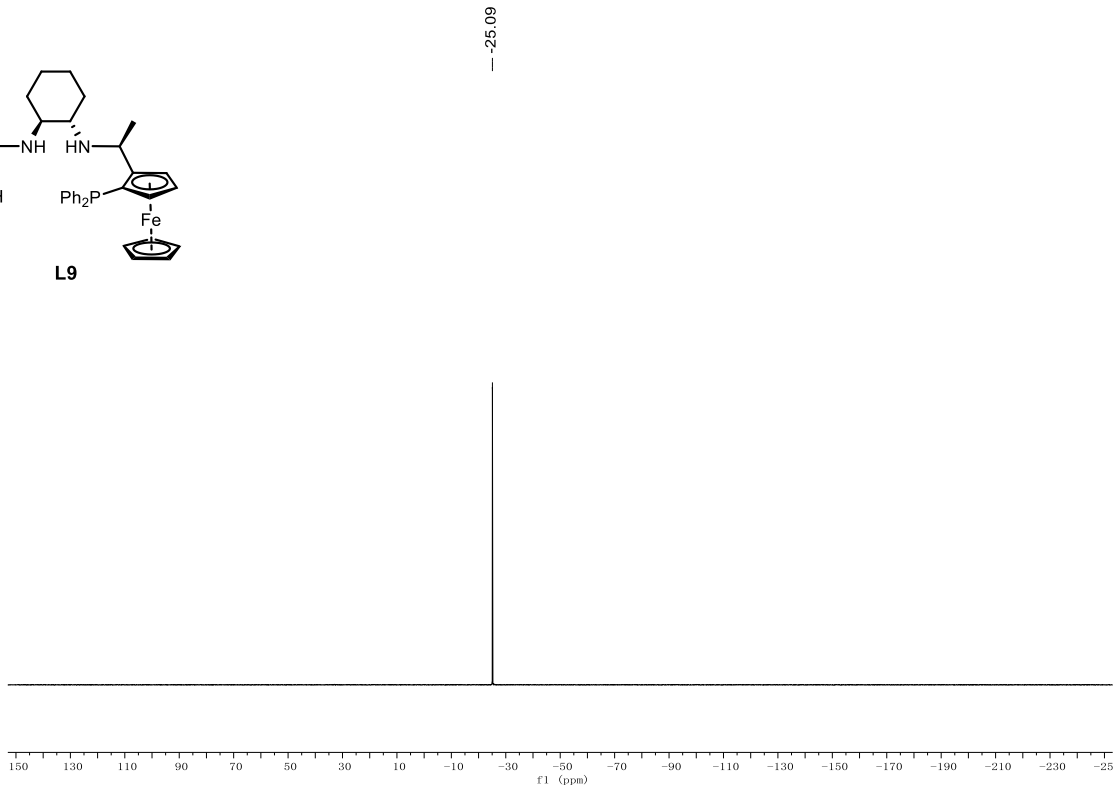

$^{31}\text{P}$  NMR

7.57, 7.56, 7.55, 7.55, 7.55, 7.54, 7.53, 7.53, 7.52, 7.41, 7.39, 7.39, 7.38, 7.38, 7.37, 7.37, 7.36, 7.36, 7.26, 7.21, 7.21, 7.20, 7.20, 7.19, 7.19, 7.14, 7.13, 7.12, 7.12, 7.11, 7.11, 7.10, 4.50, 4.49, 4.49, 4.49, 4.48, 4.48, 4.34, 4.33, 4.32, 4.01, 4.00, 3.84, 3.84, 3.84, 3.83, 3.83, 3.79, 3.78, 3.76, 3.75, 3.62, 3.61, 3.61, 3.59, 3.55, 3.53, 3.52, 1.51, 1.49, 0.94

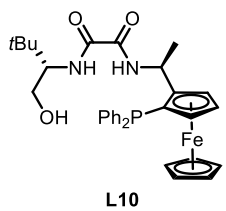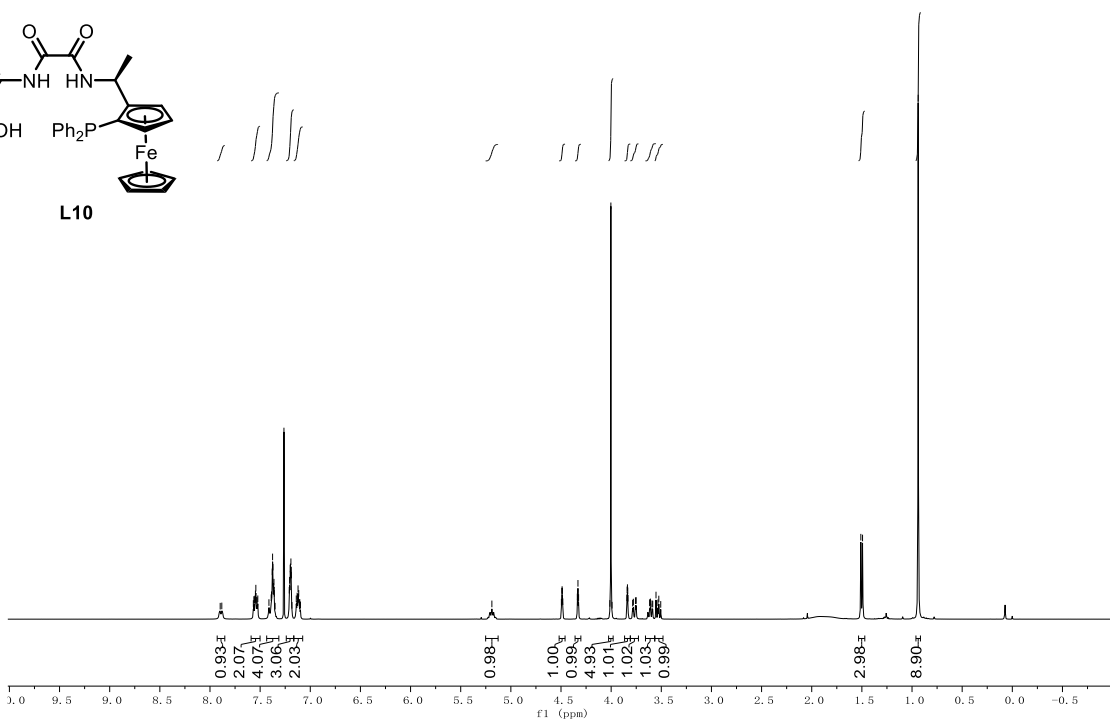

$^1\text{H}$  NMR



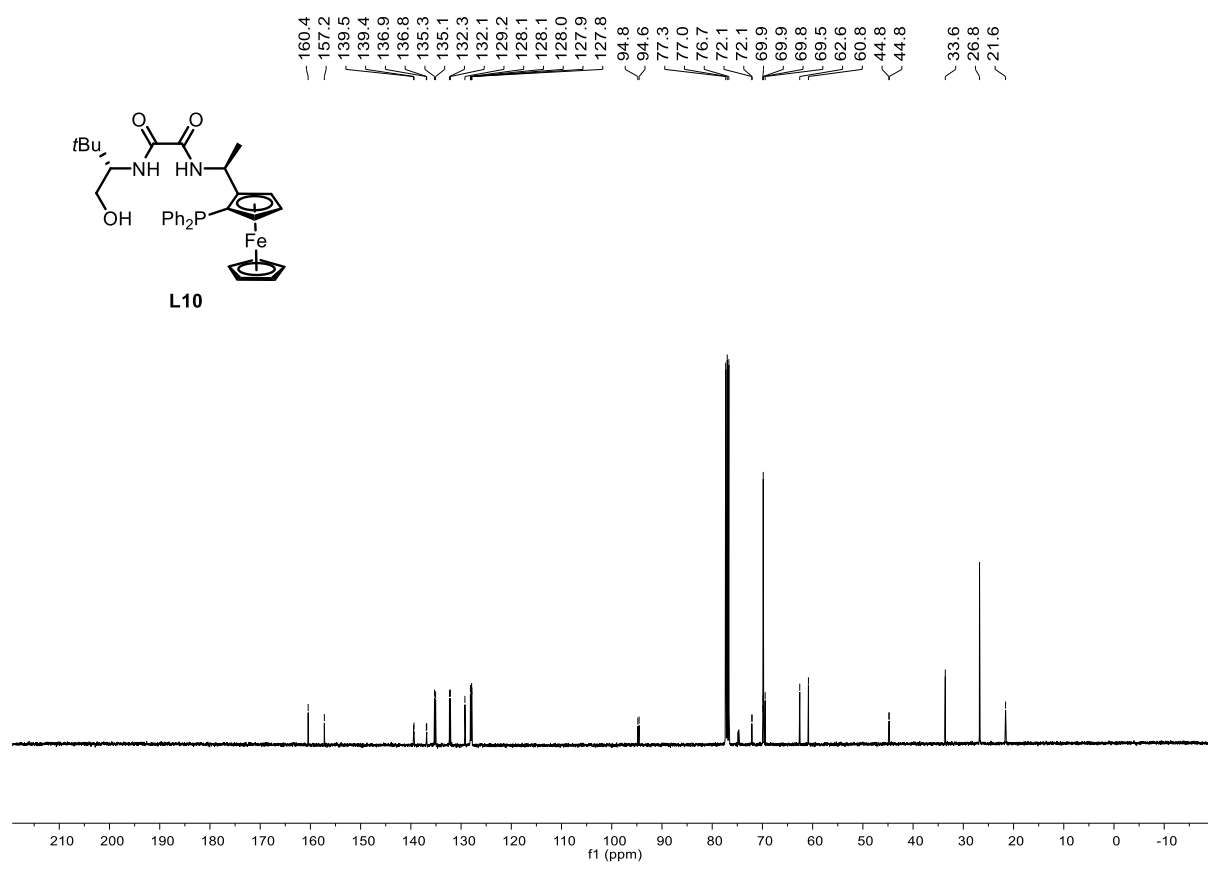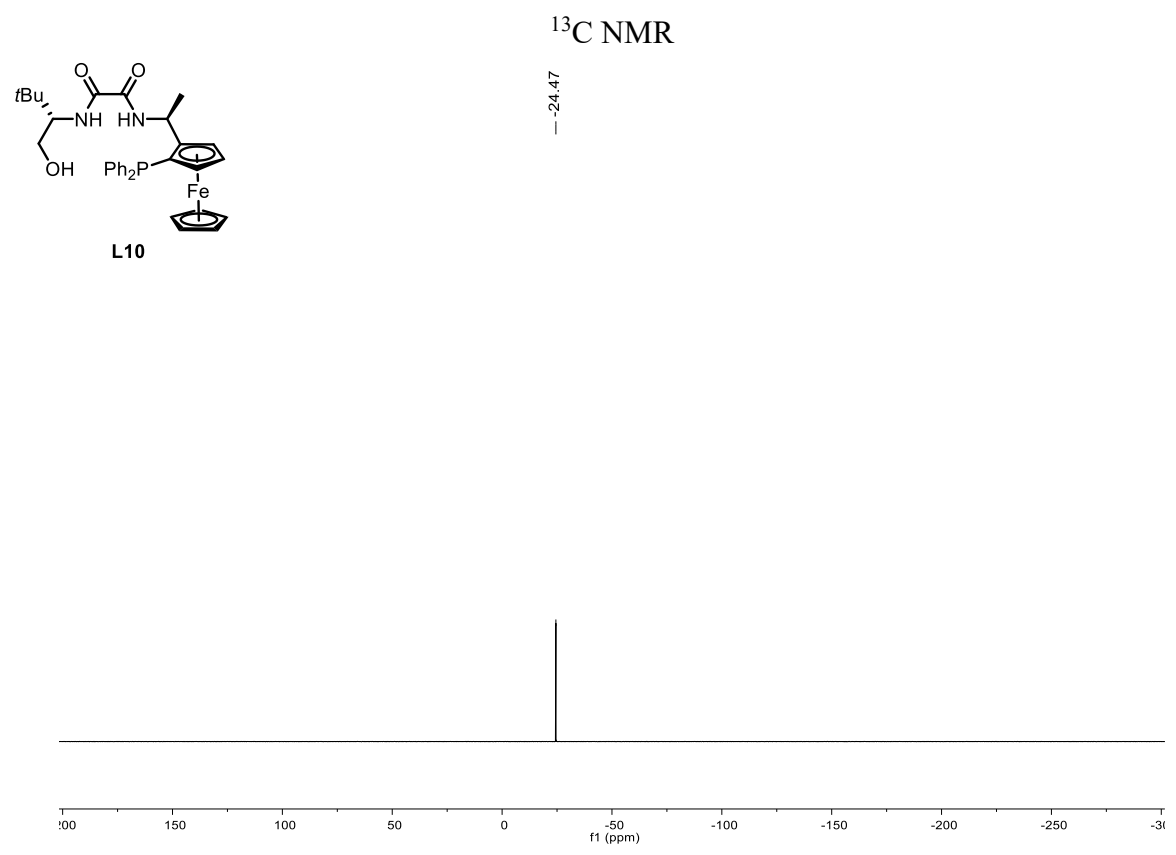

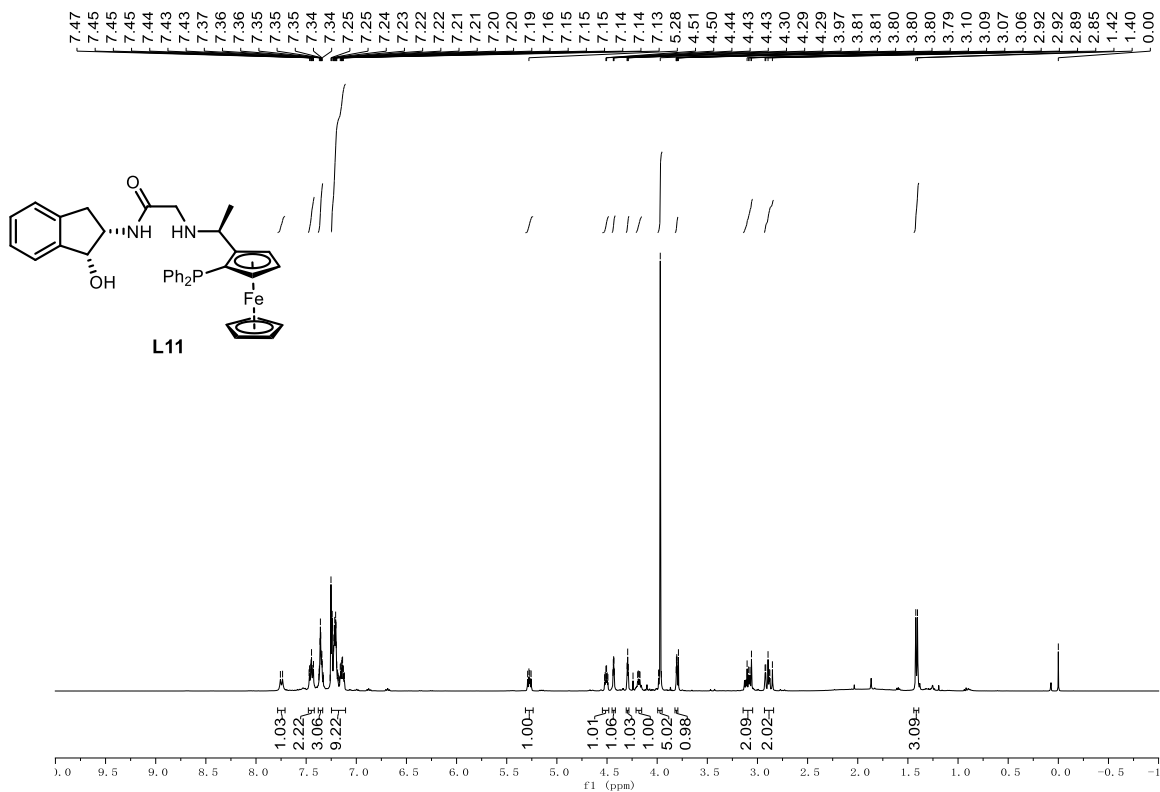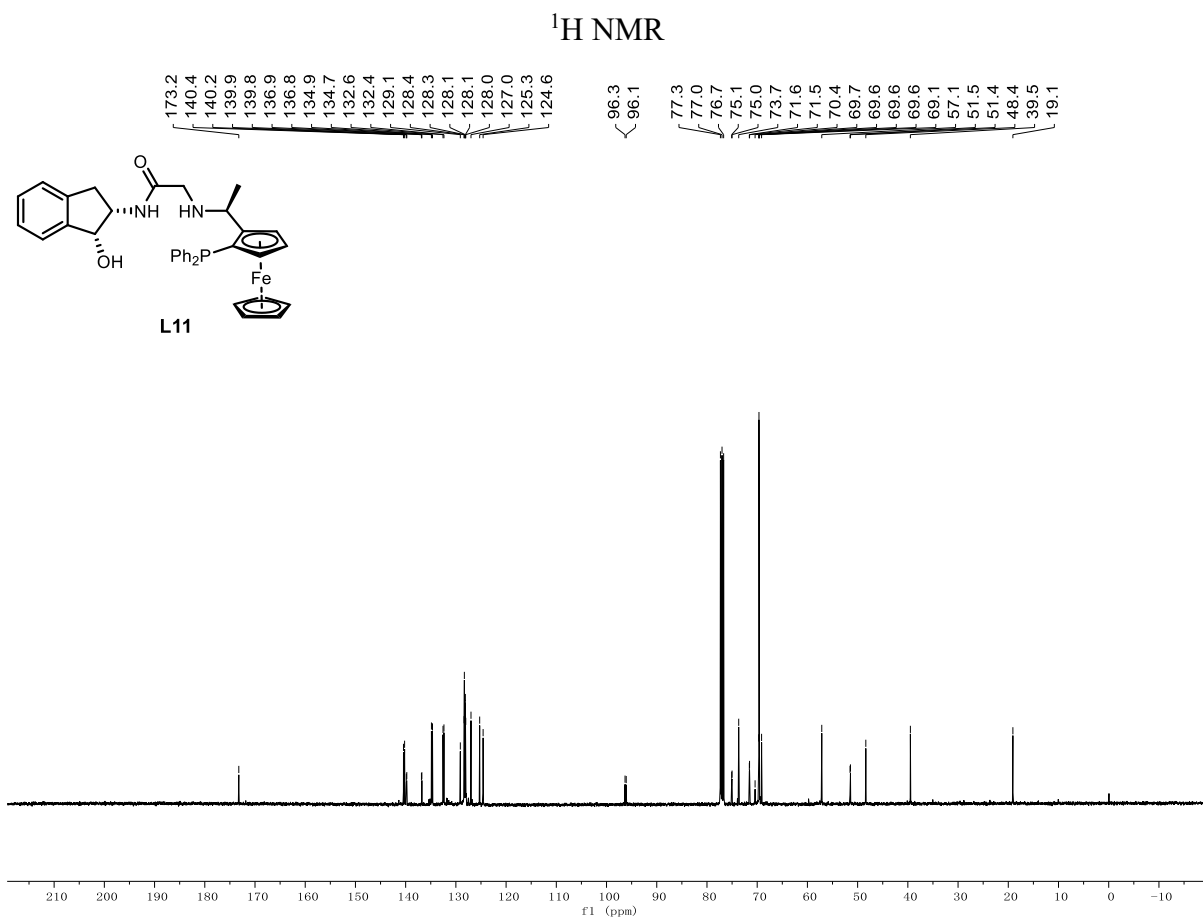

**<sup>13</sup>C NMR**

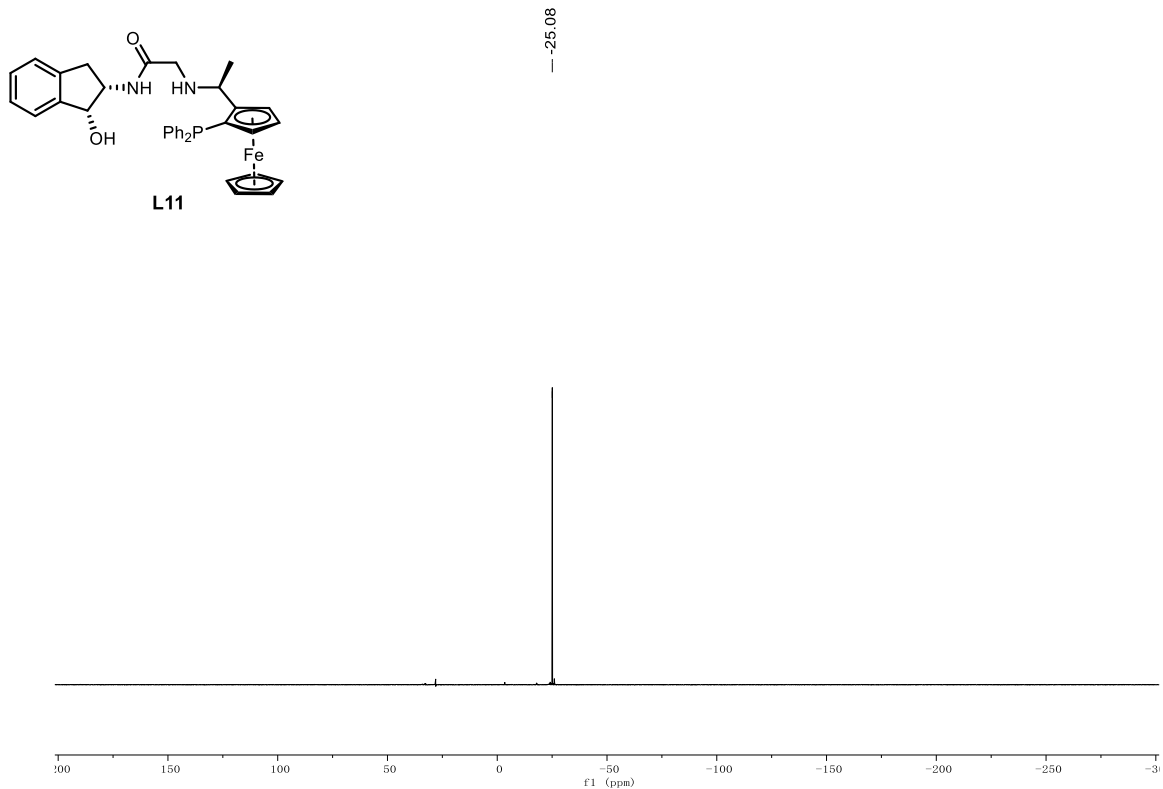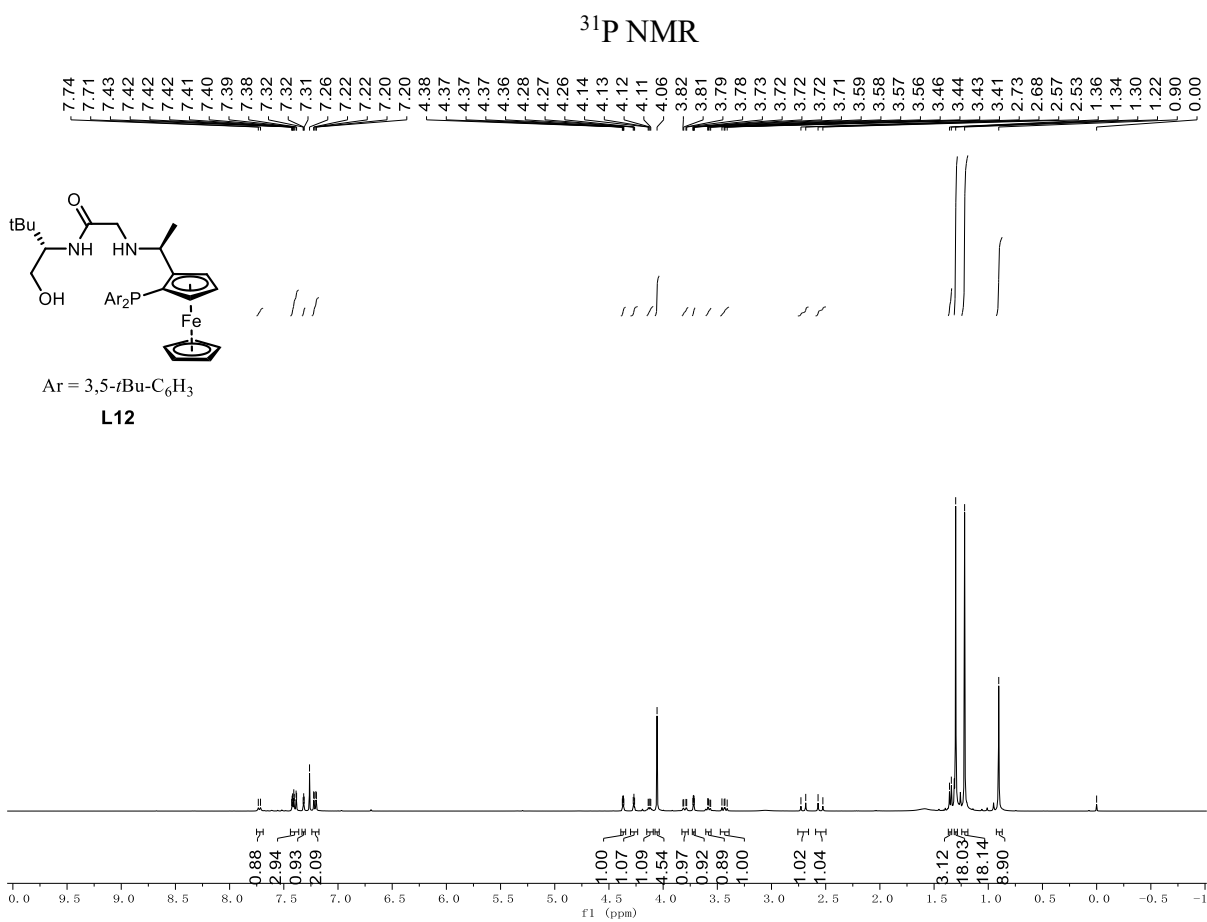

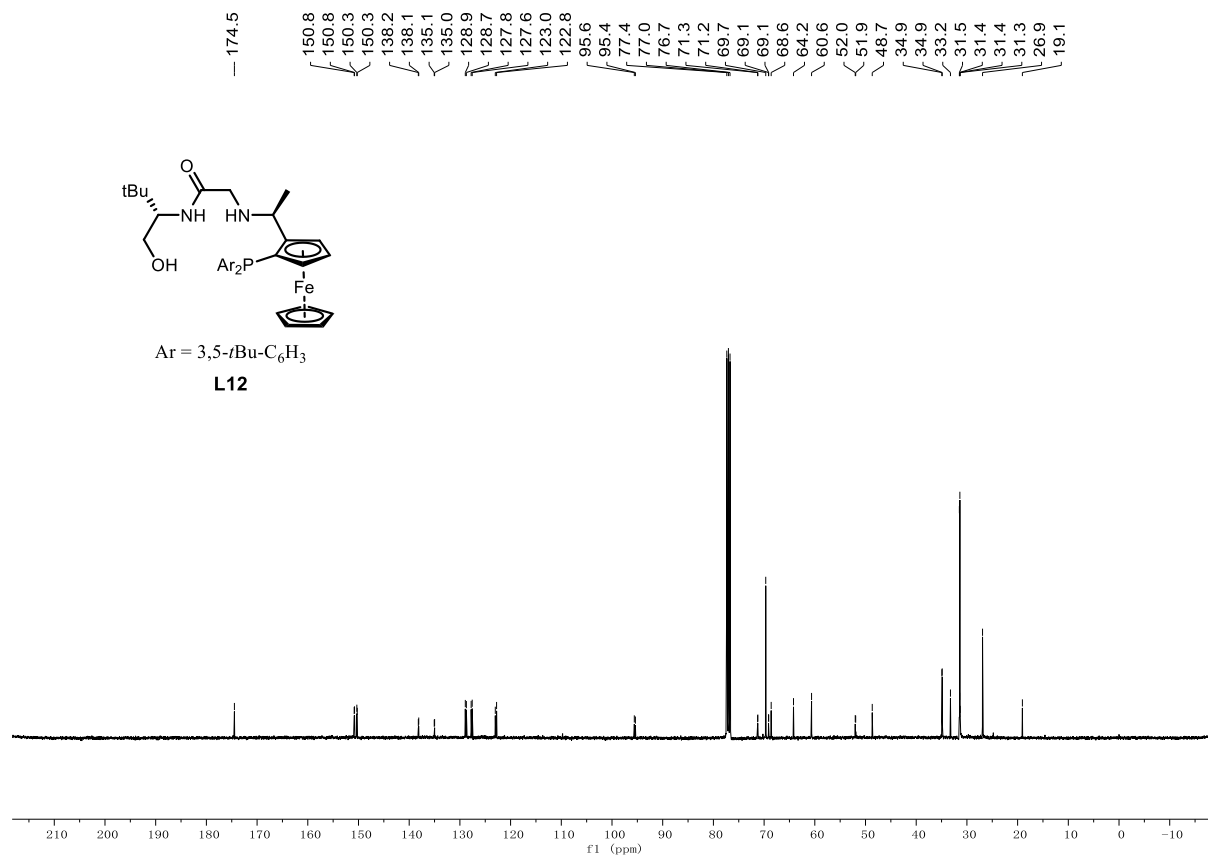

$^{13}\text{C}$  NMR

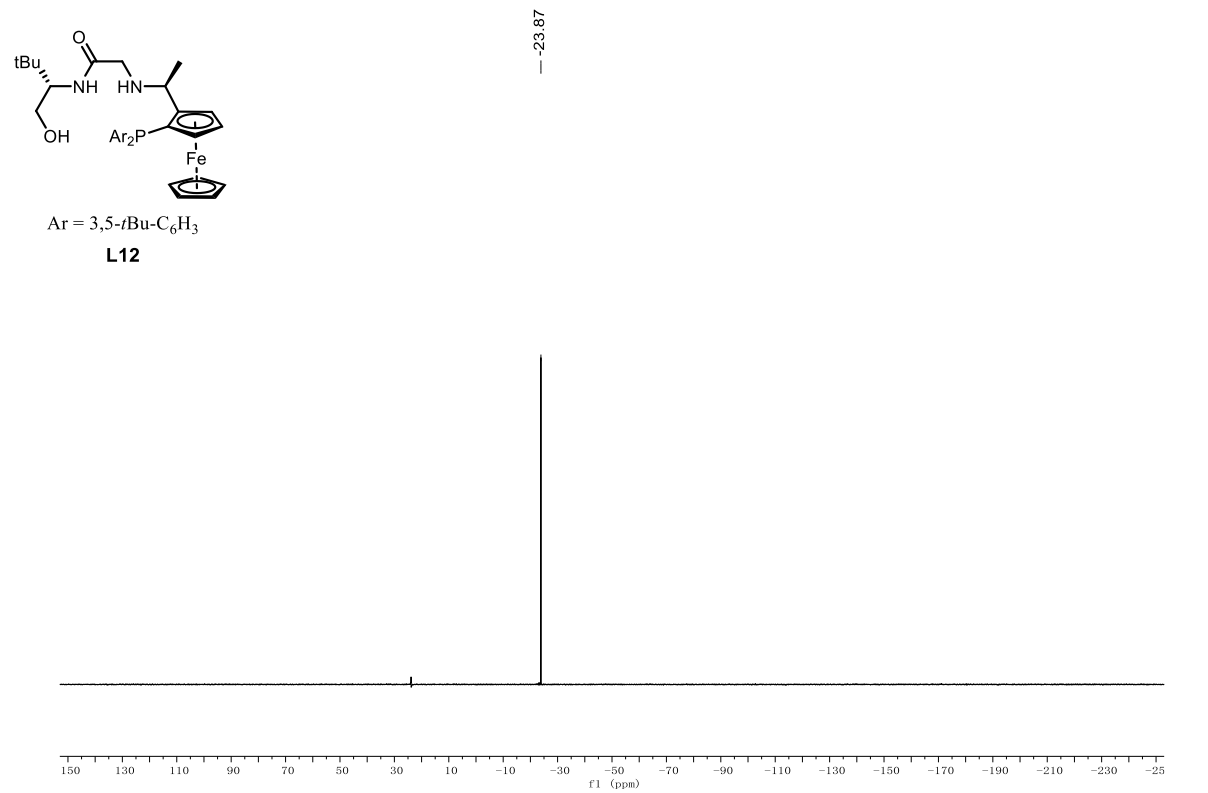

$^{31}\text{P}$  NMR

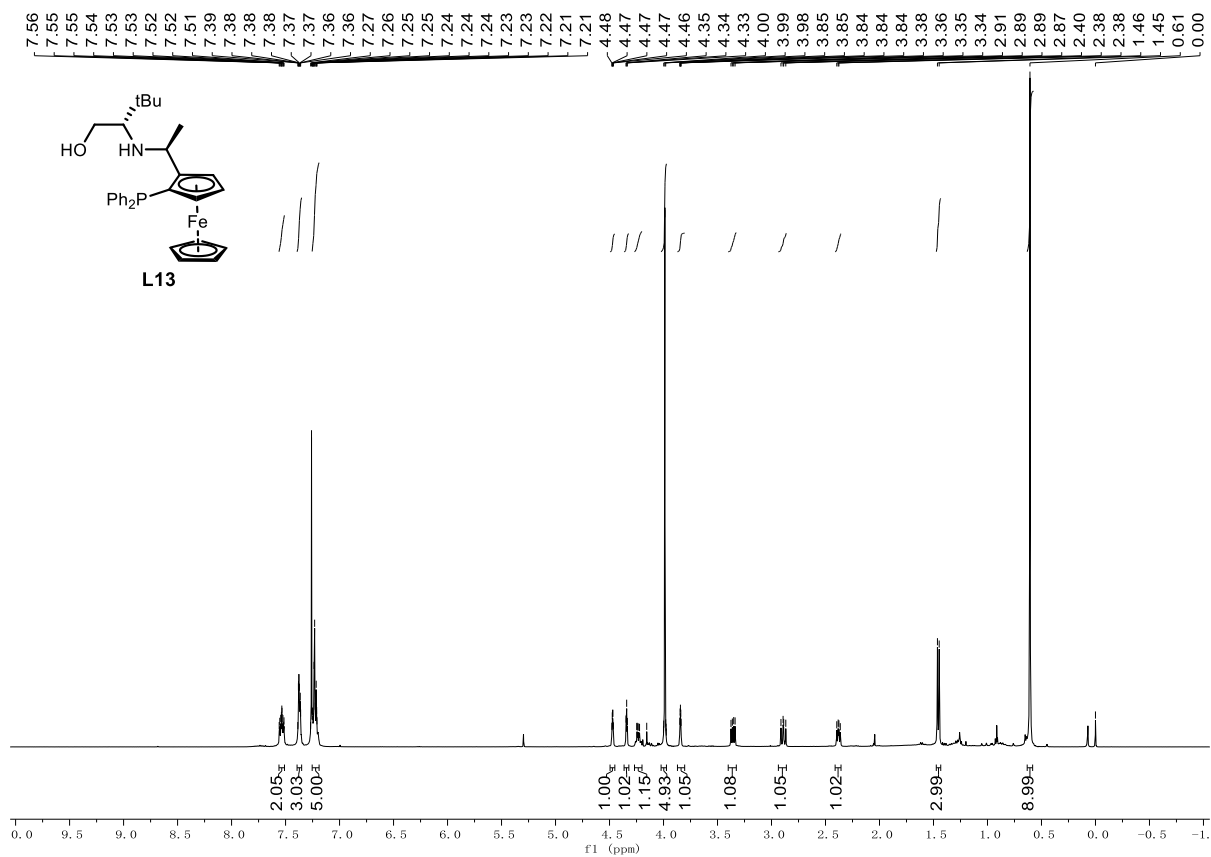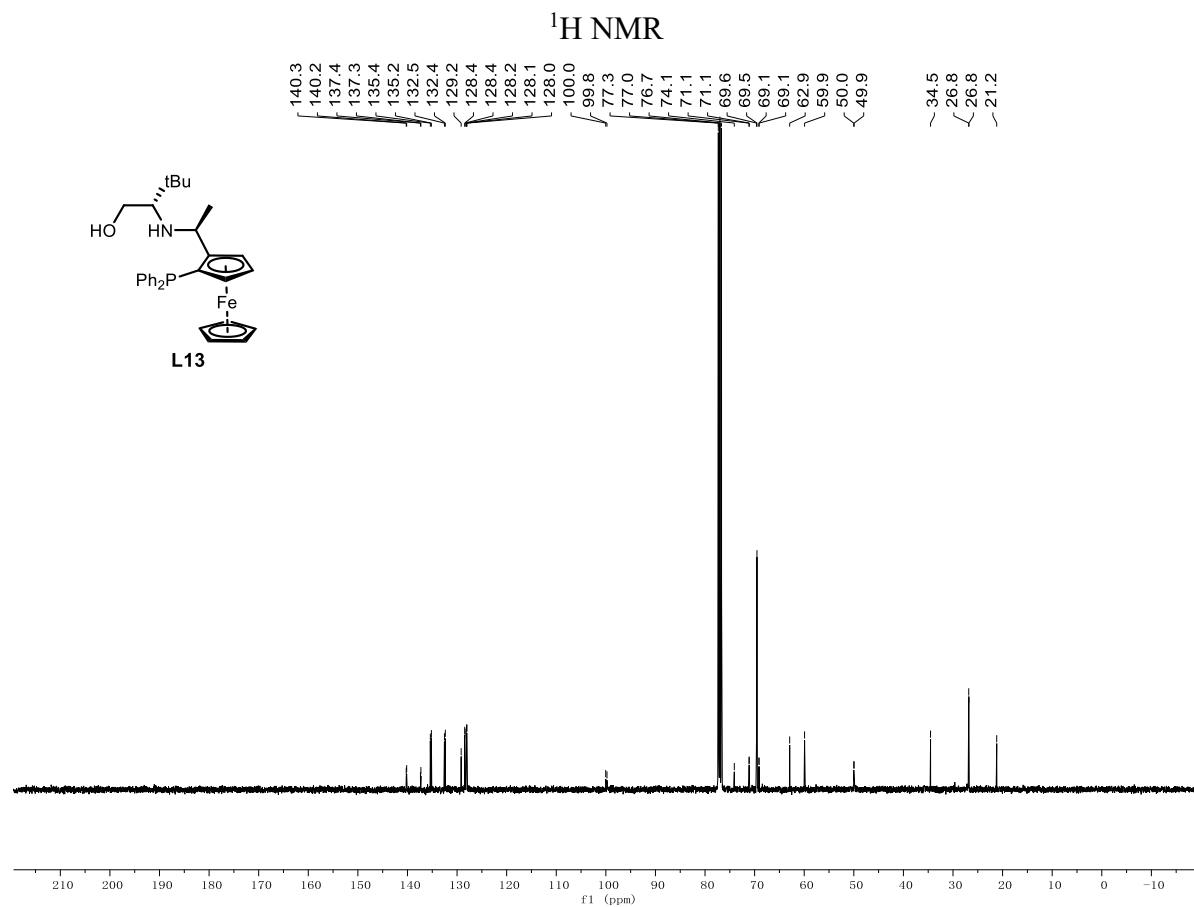

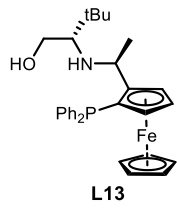

-25.74

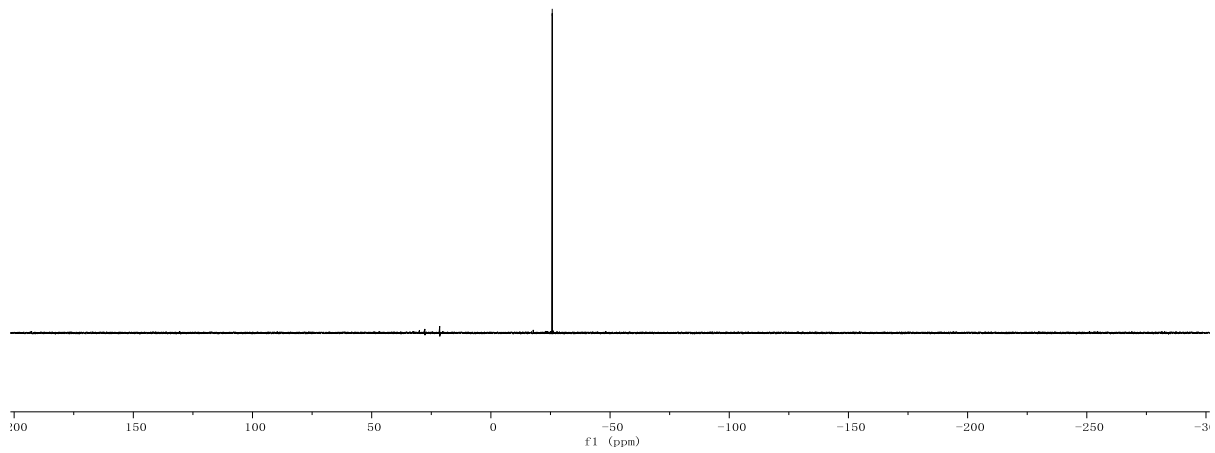

<sup>31</sup>P NMR

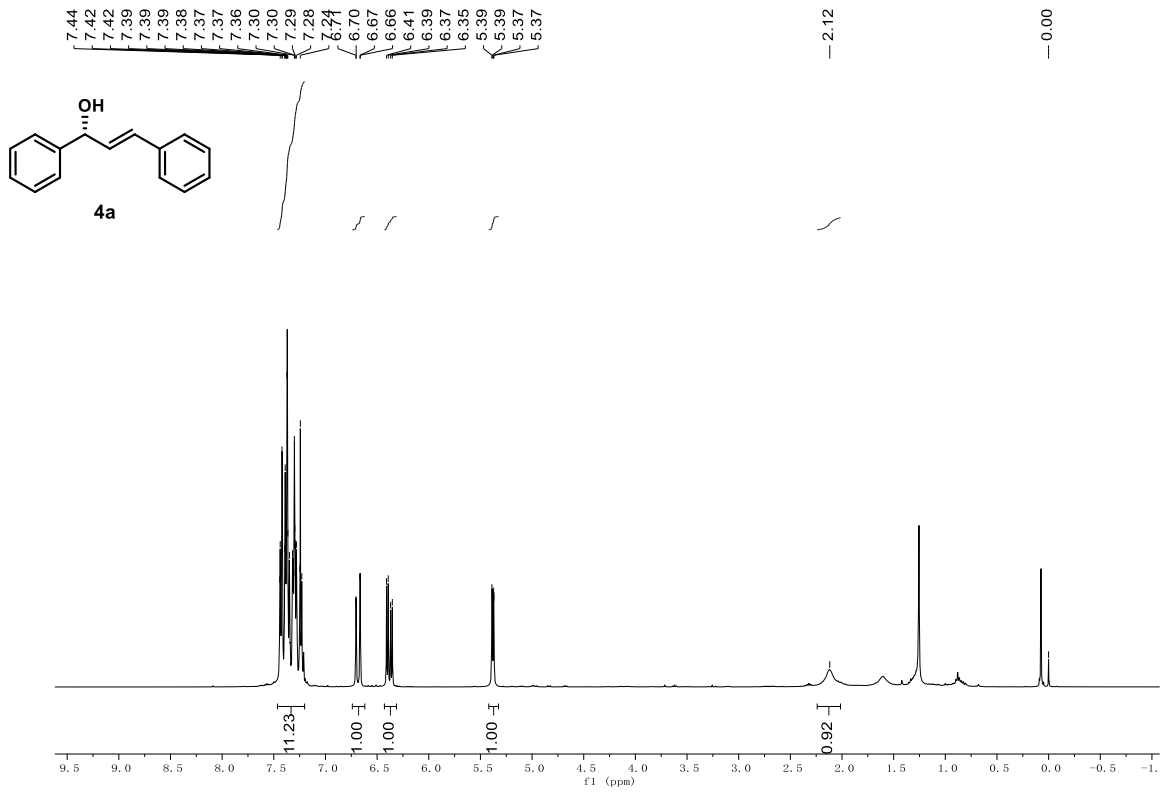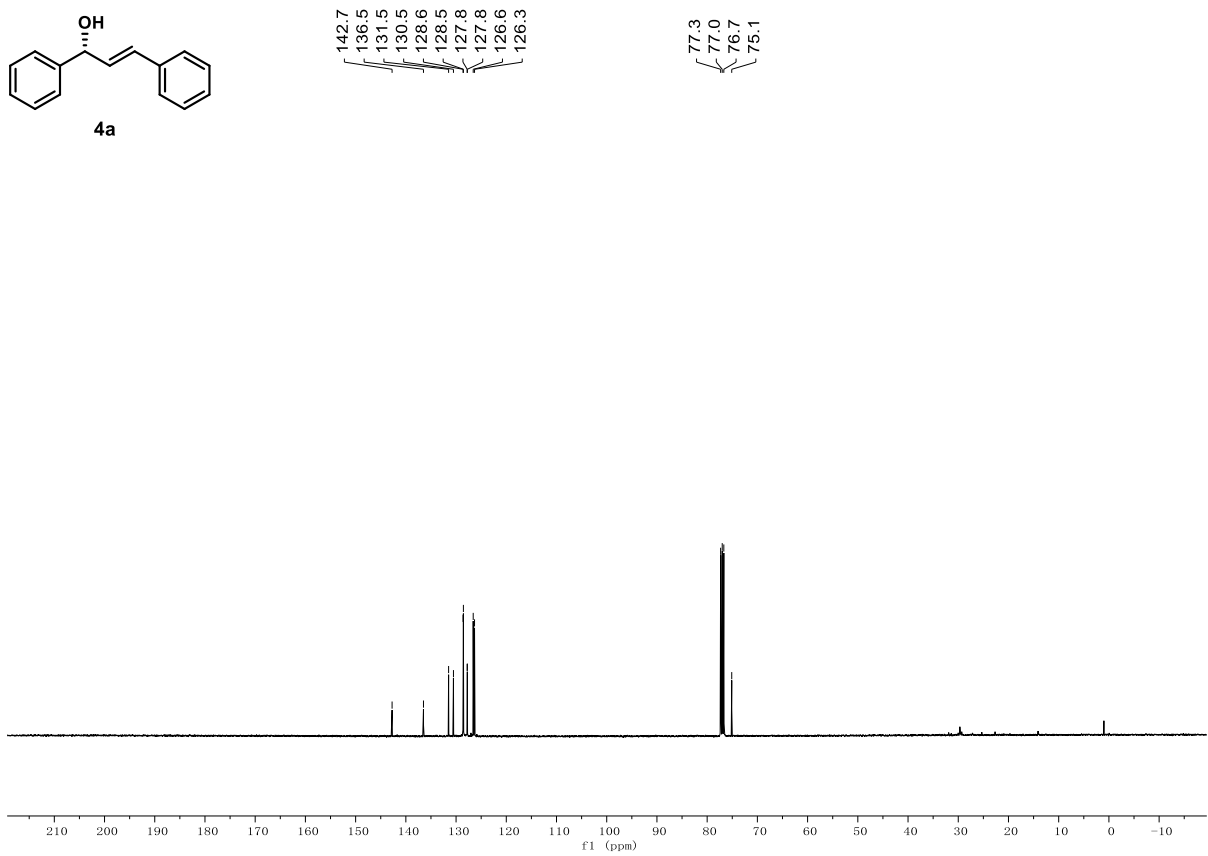

**<sup>13</sup>C NMR**

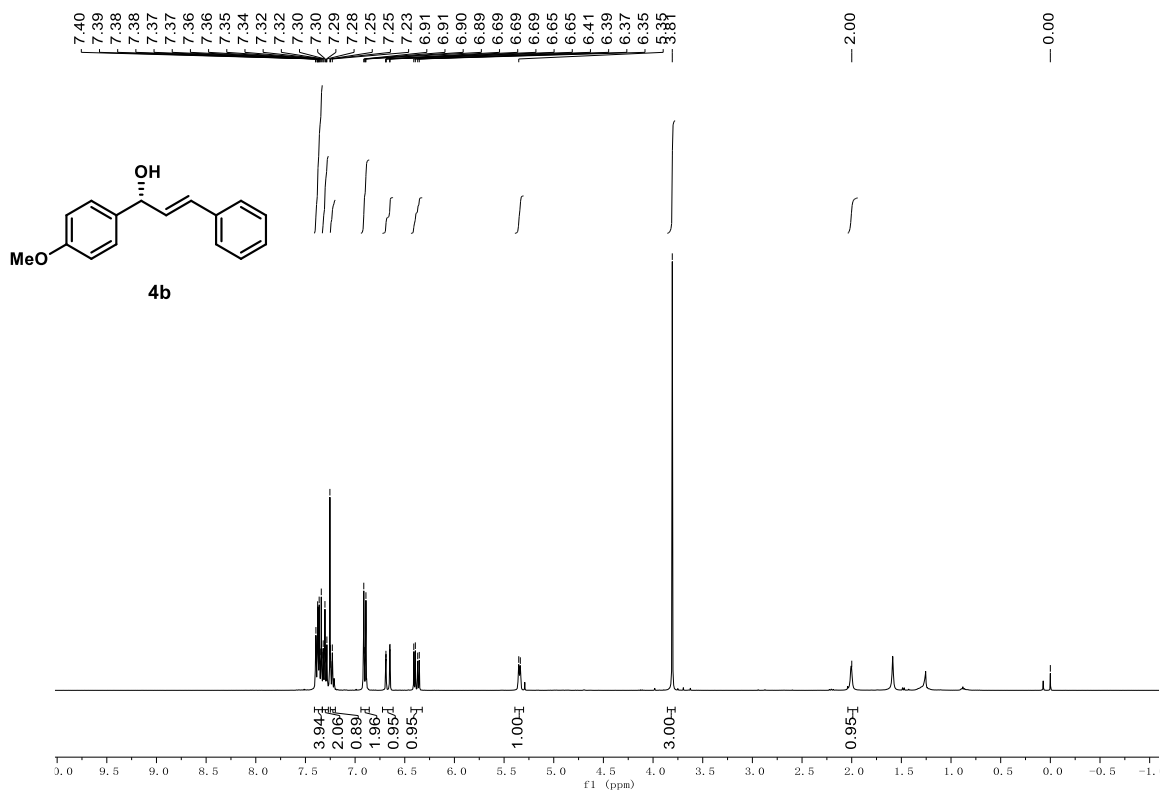

<sup>1</sup>H NMR

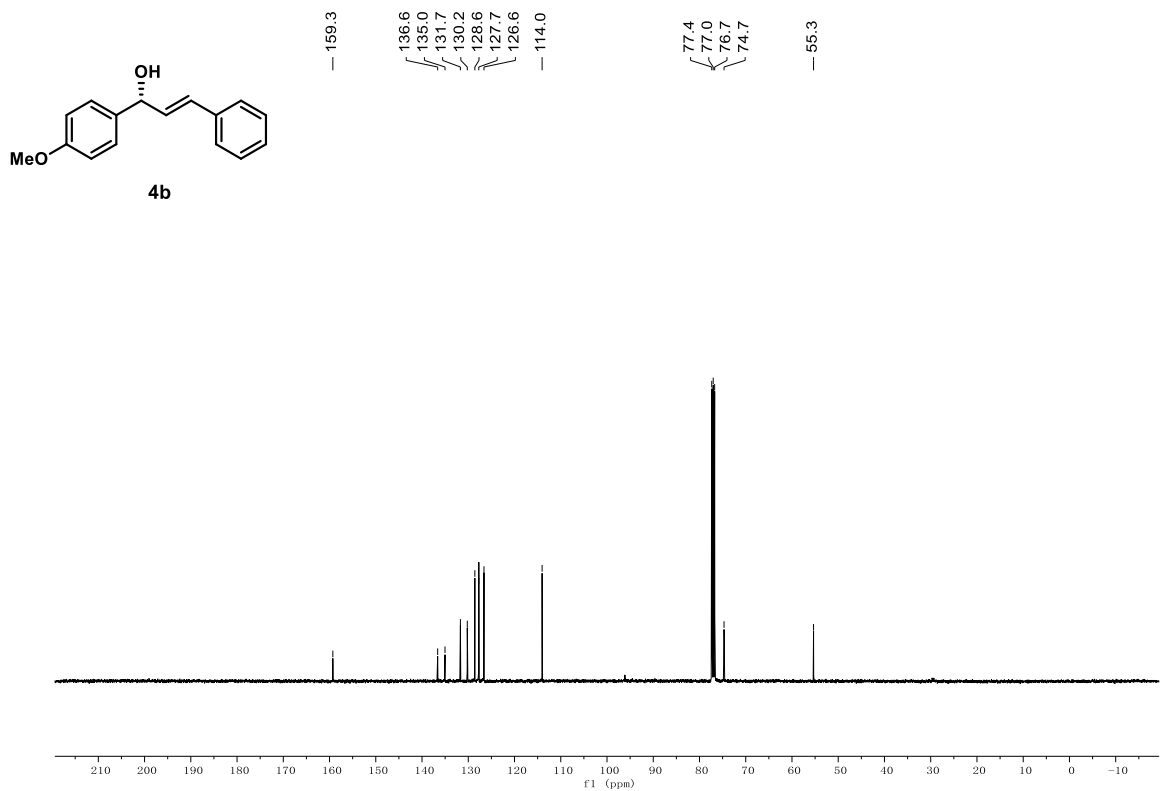

<sup>13</sup>C NMR



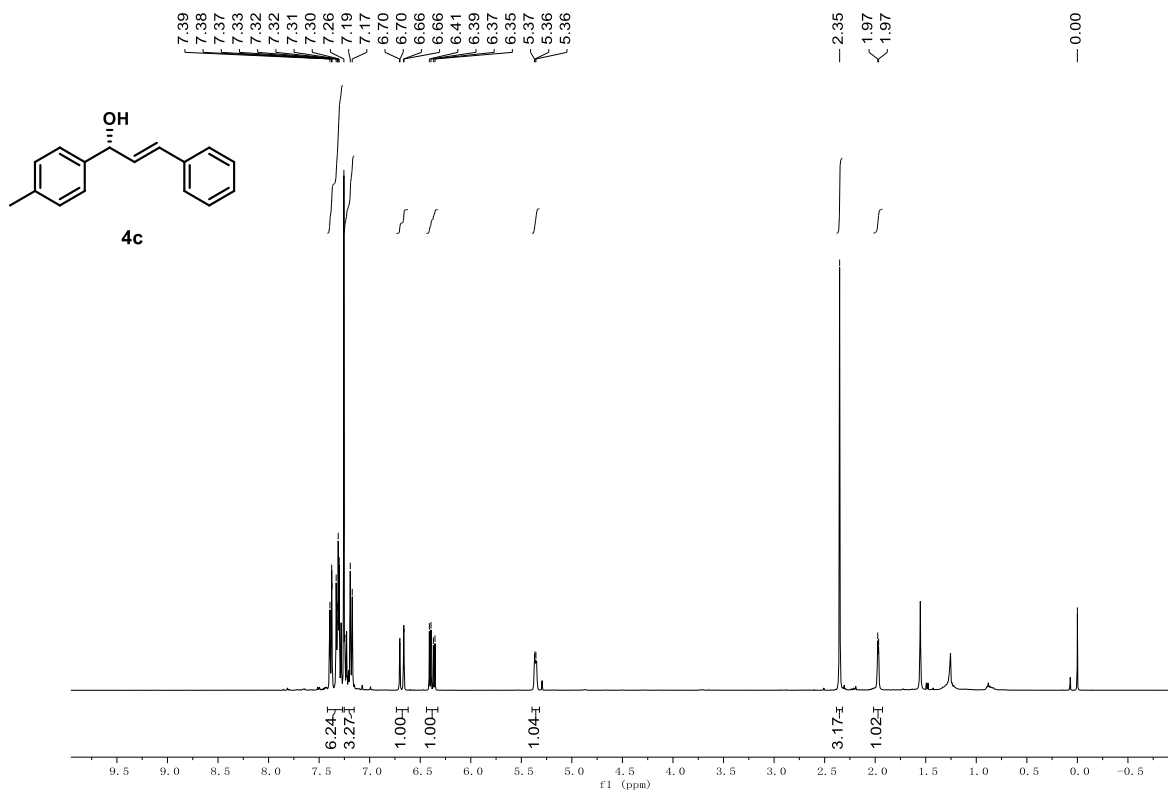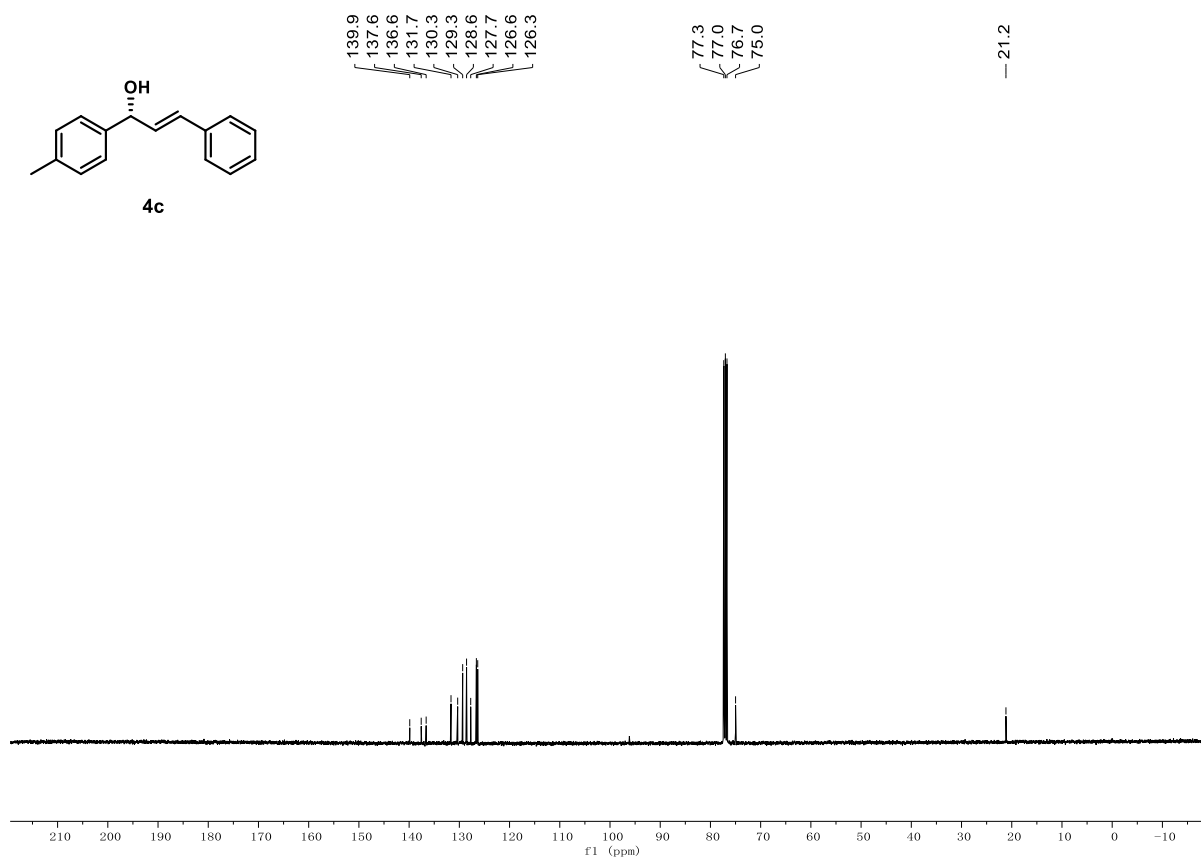

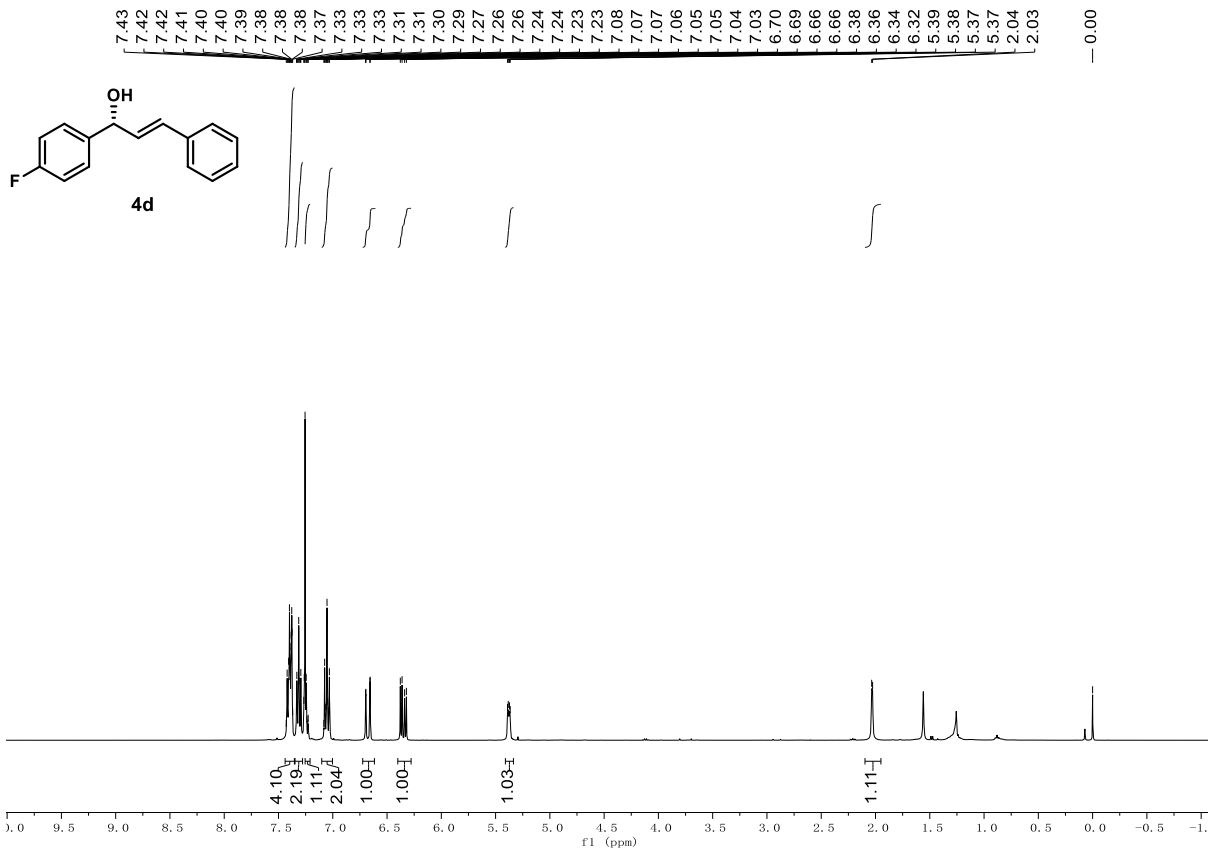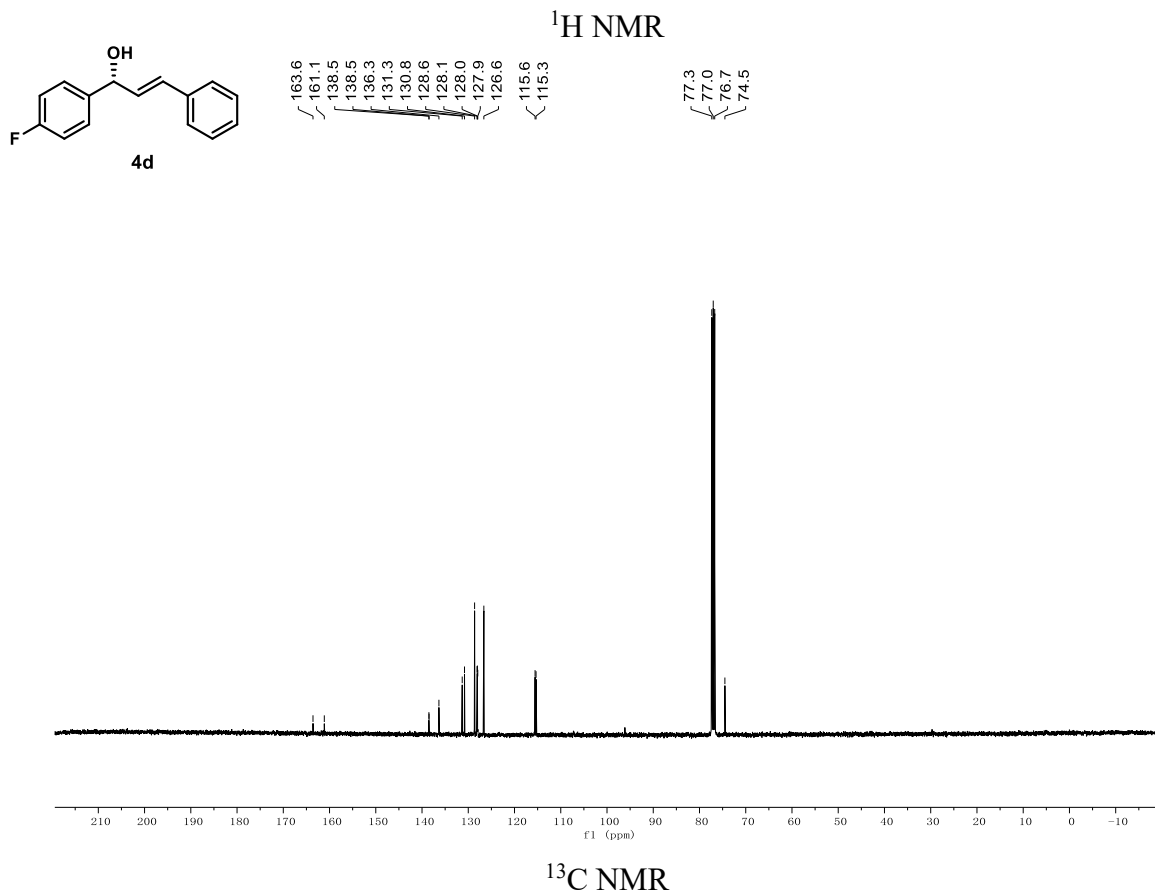

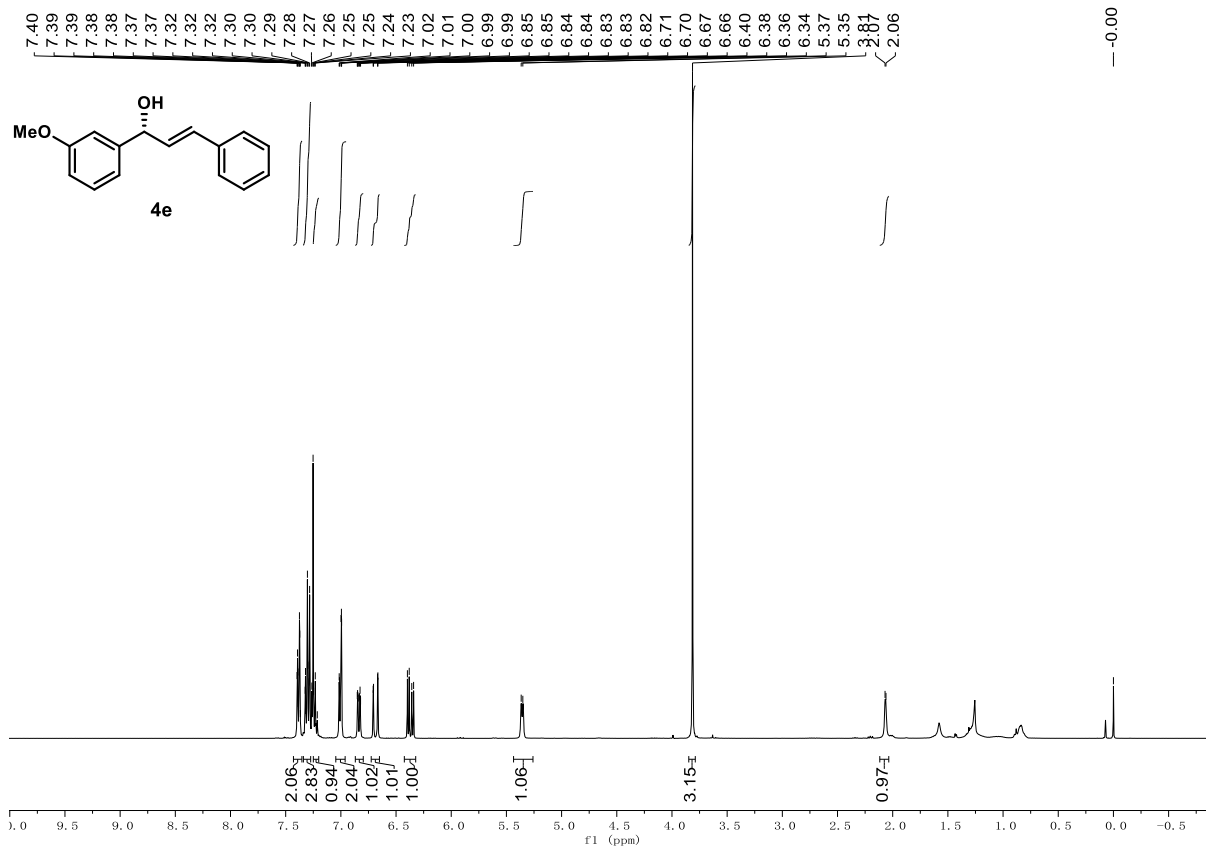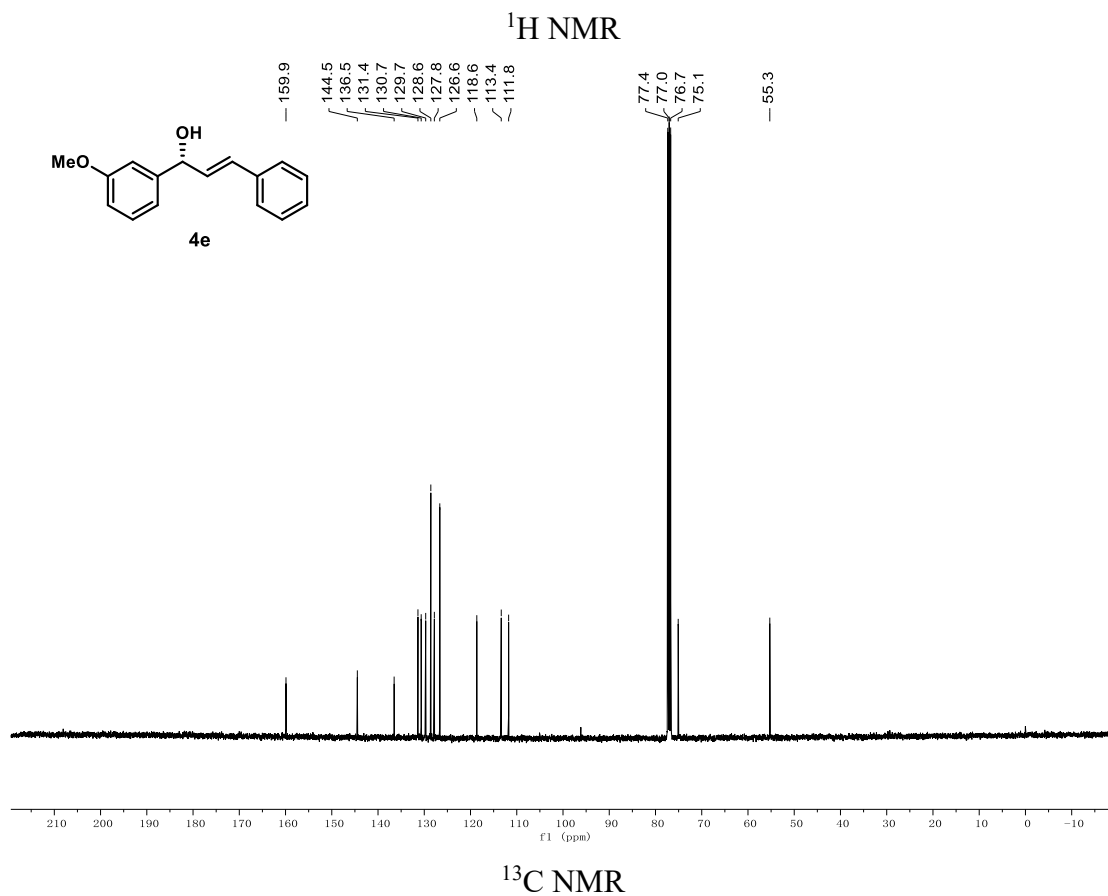

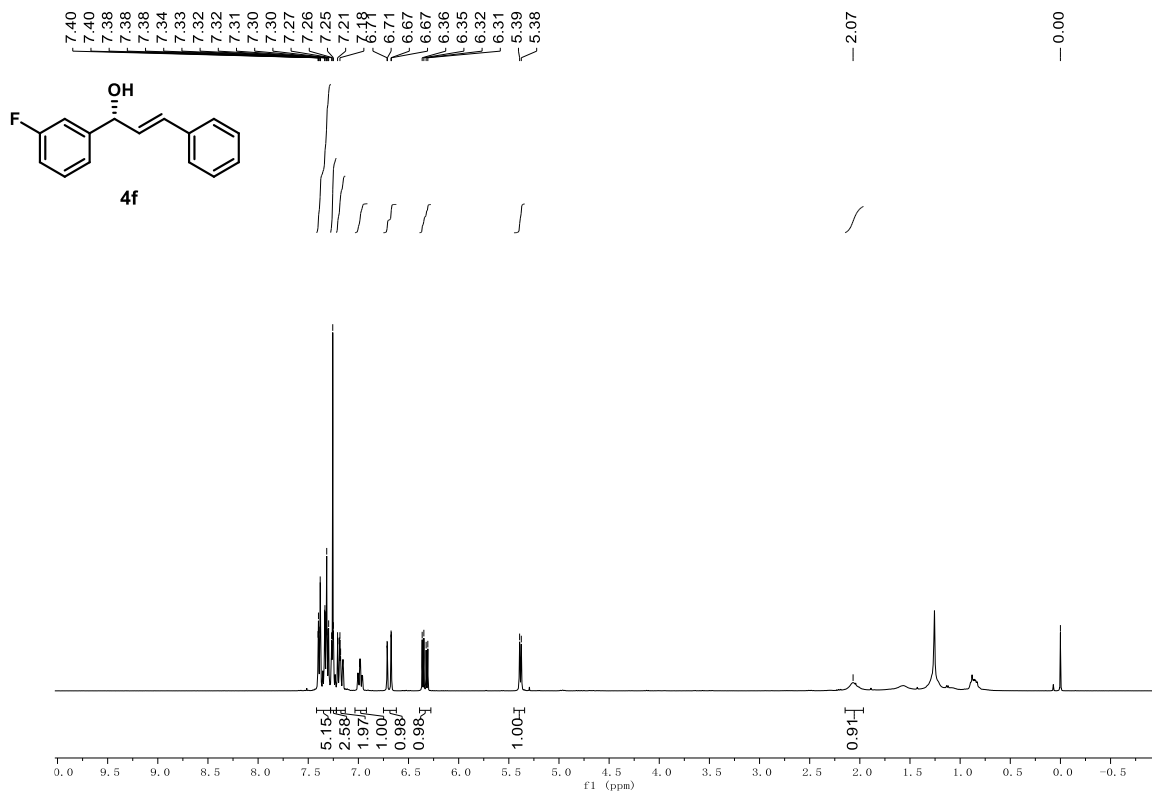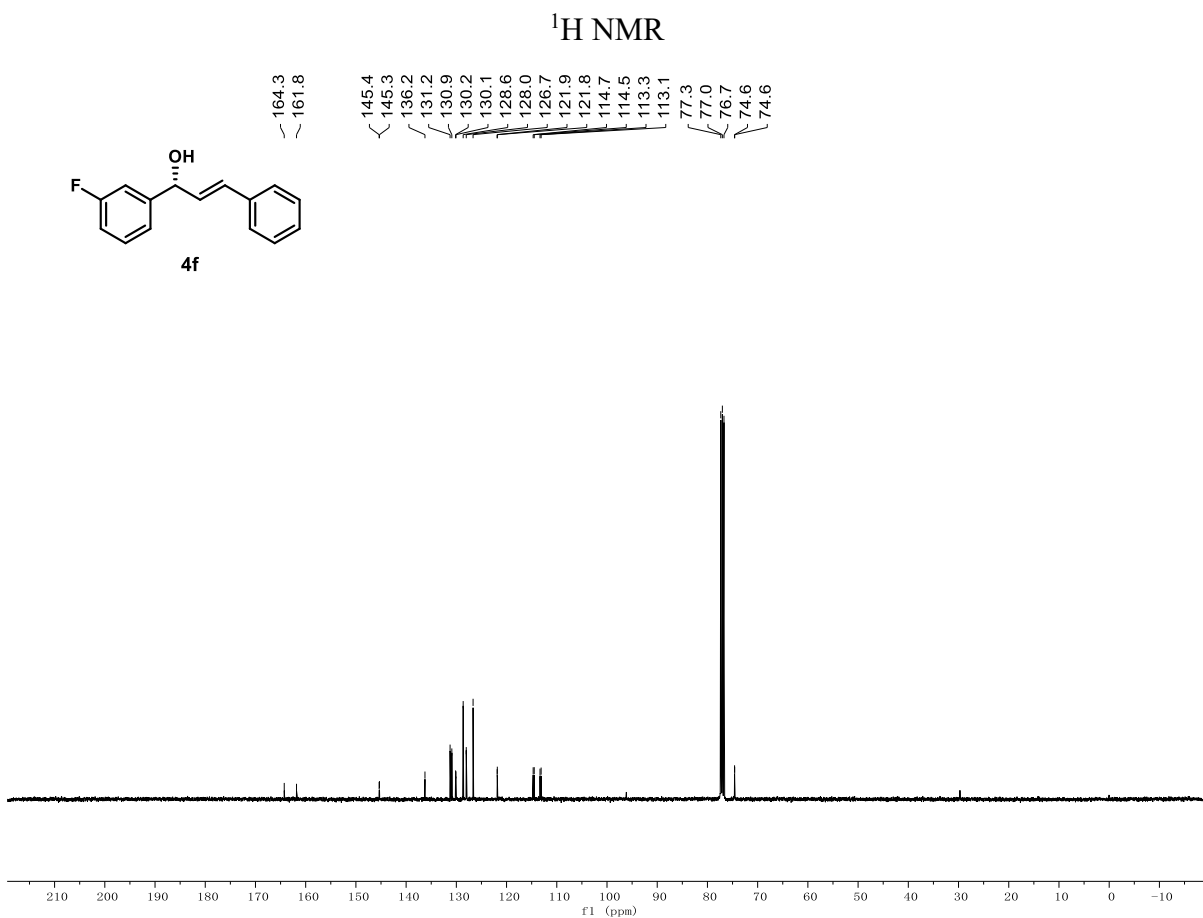

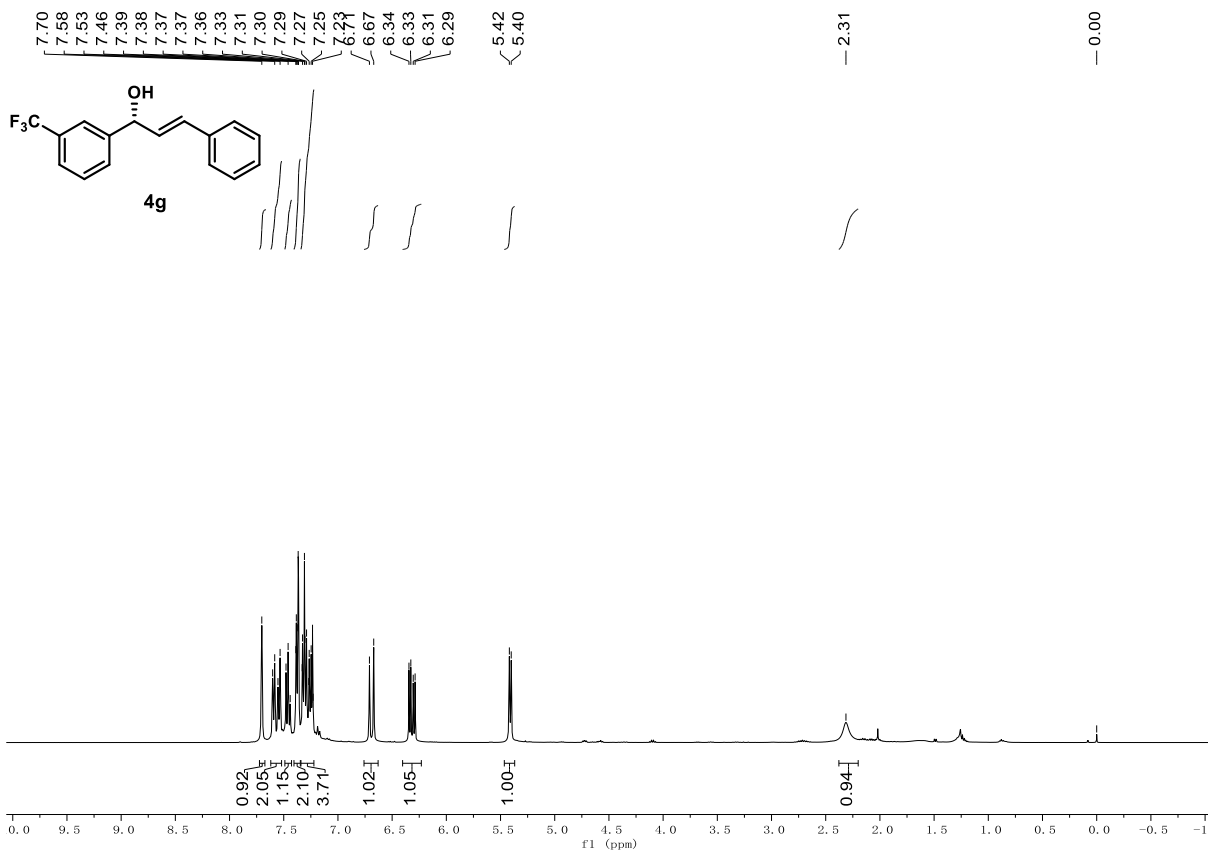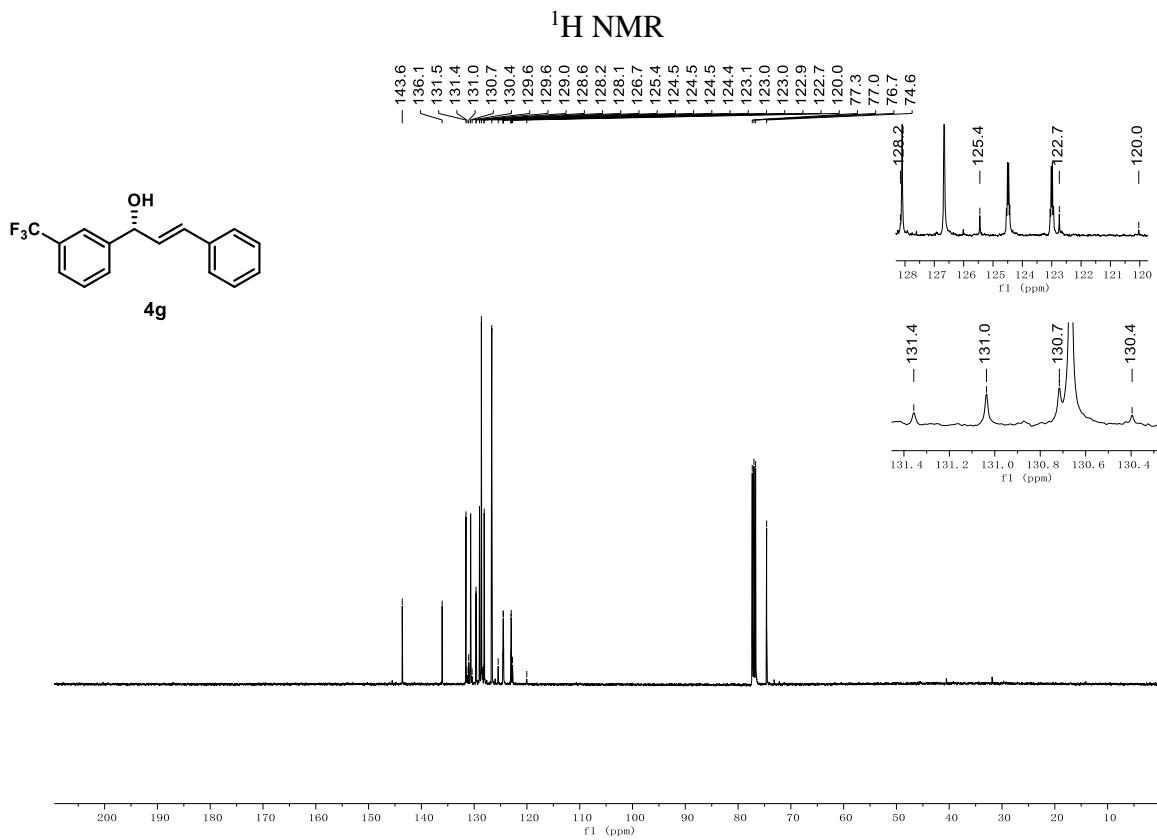

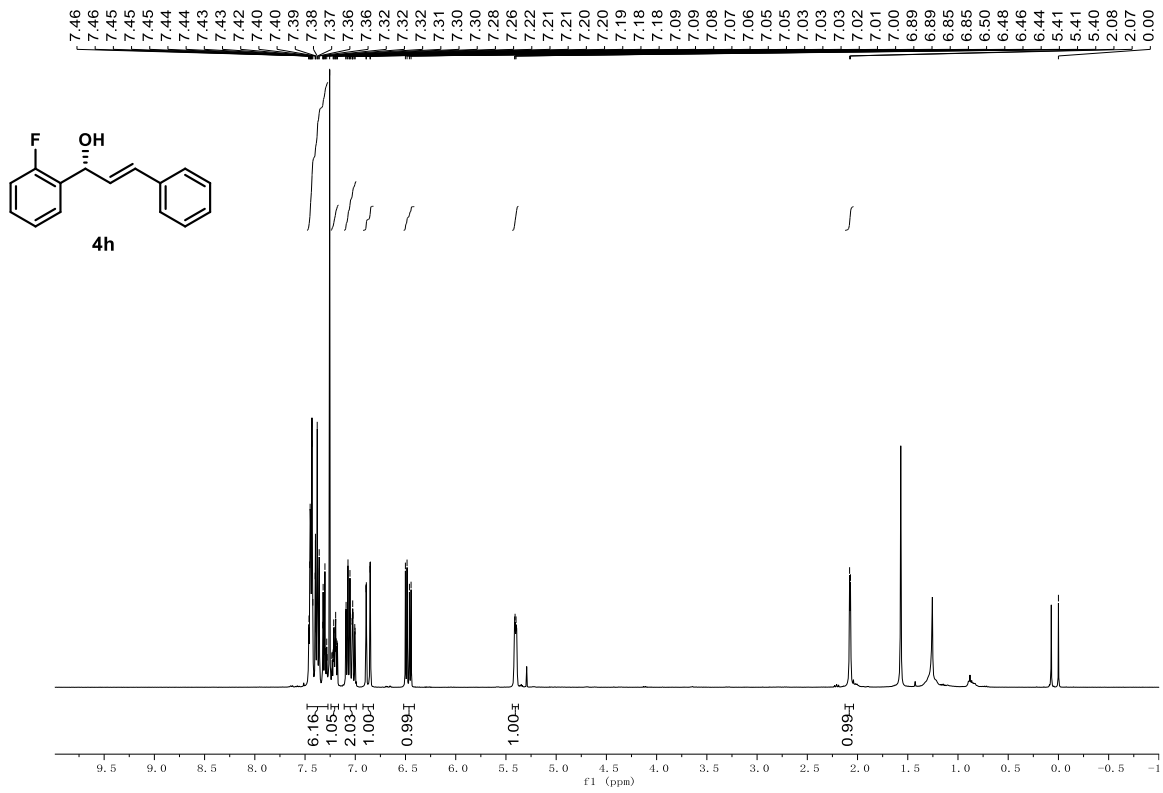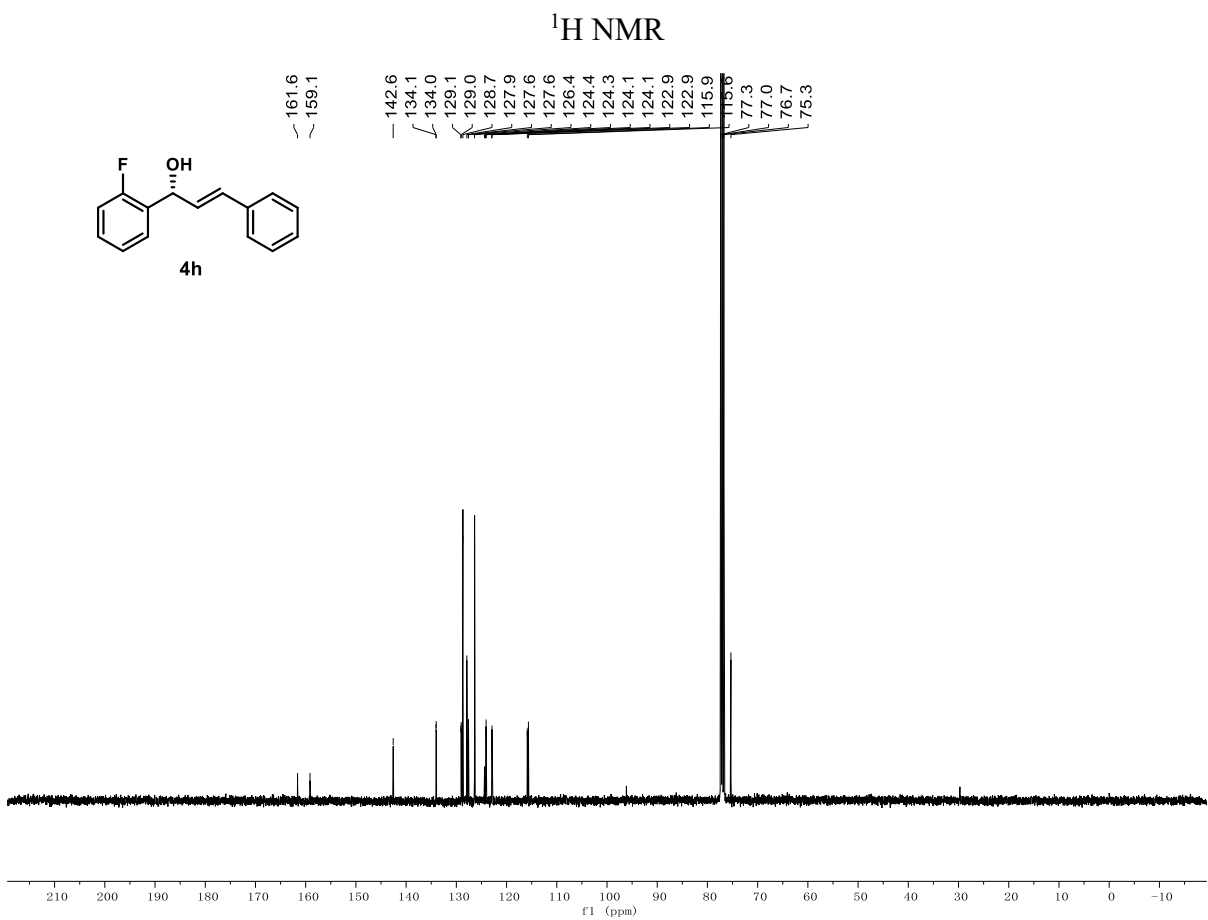

**<sup>13</sup>C NMR**

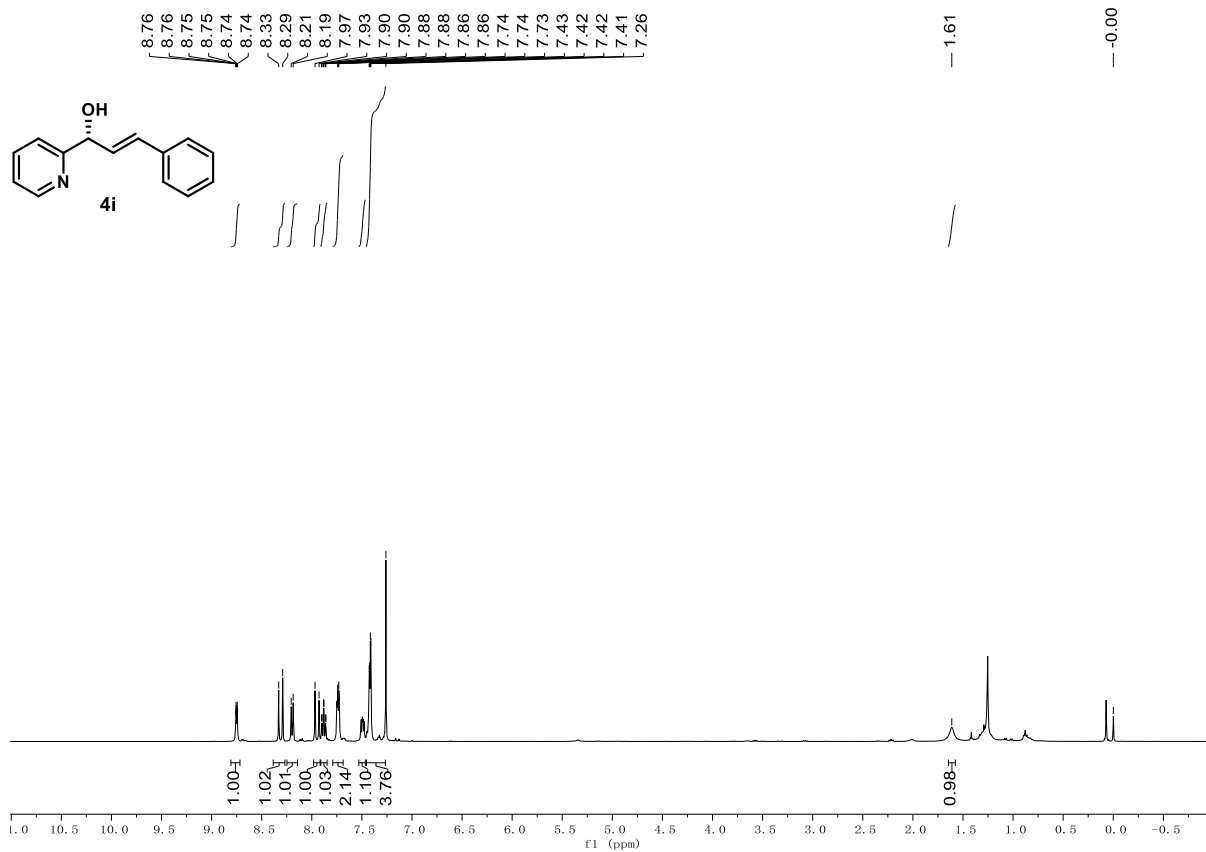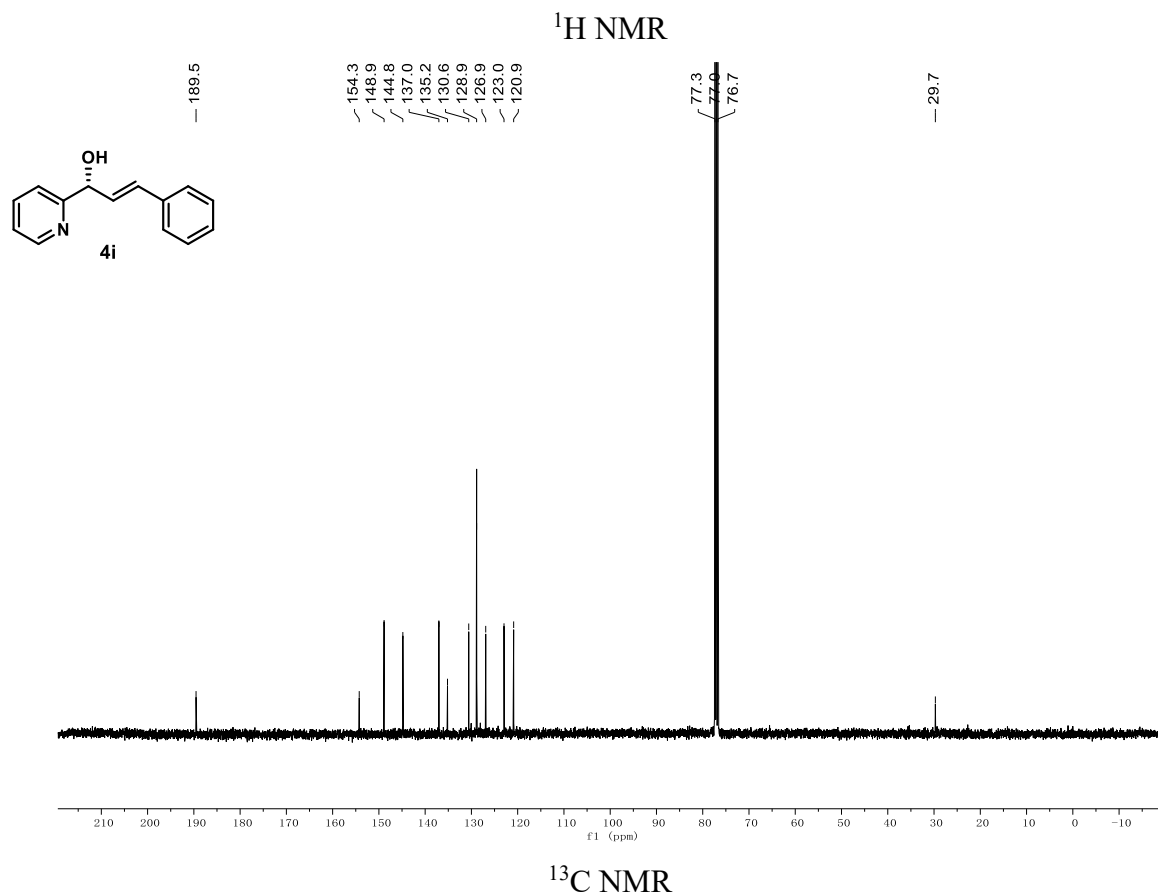

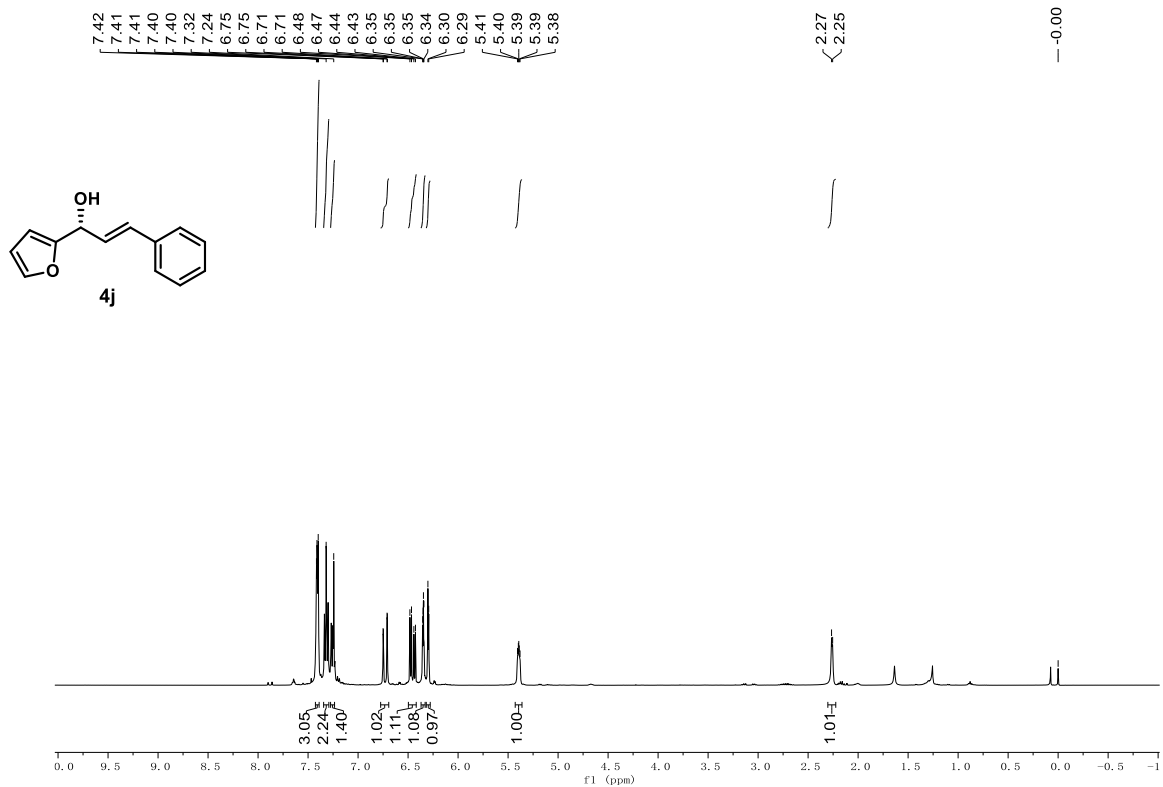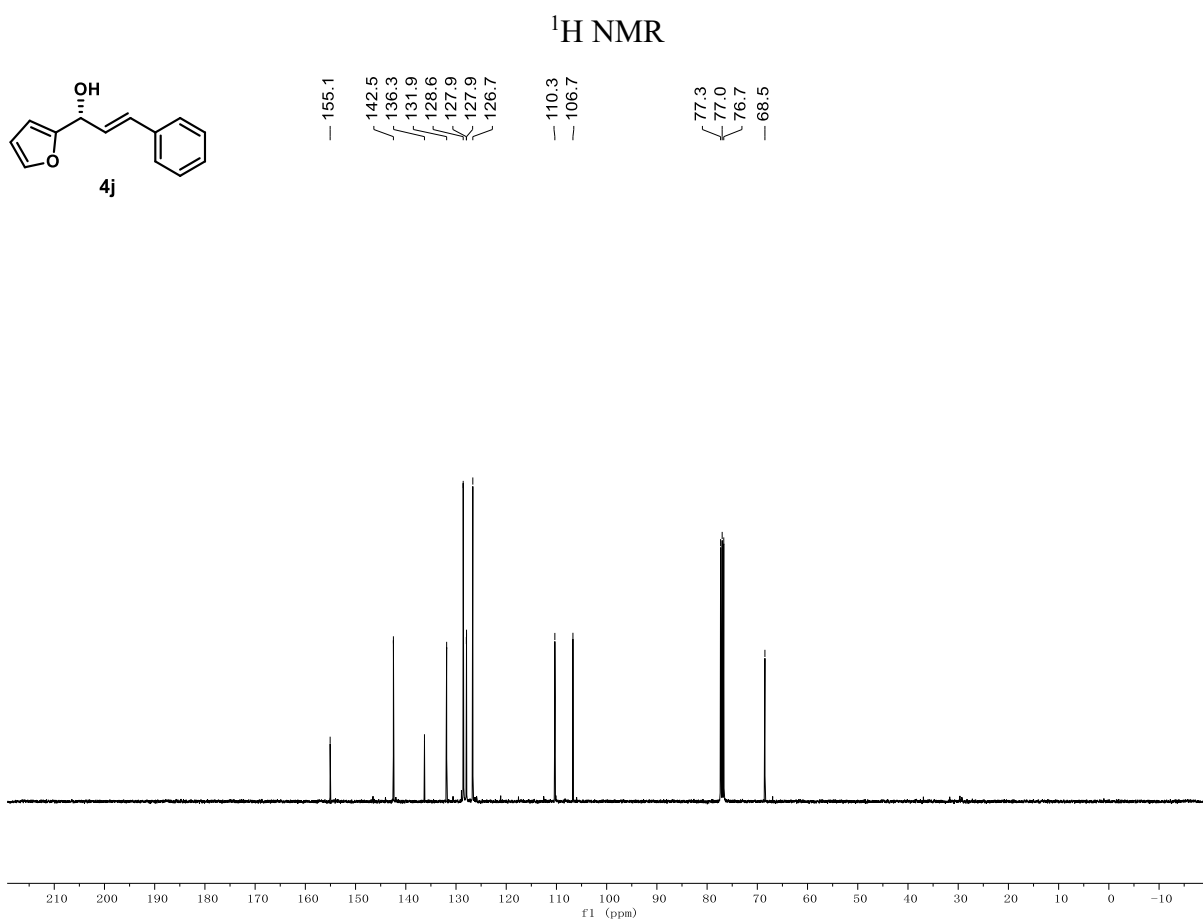



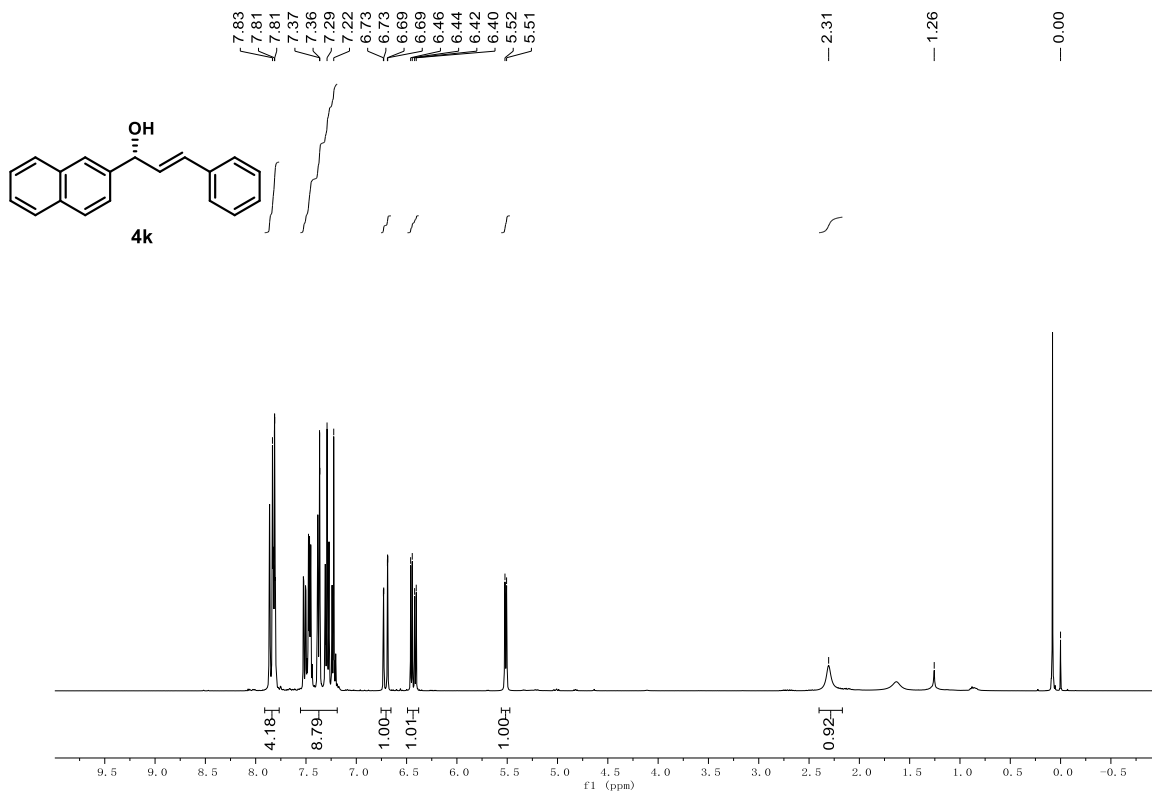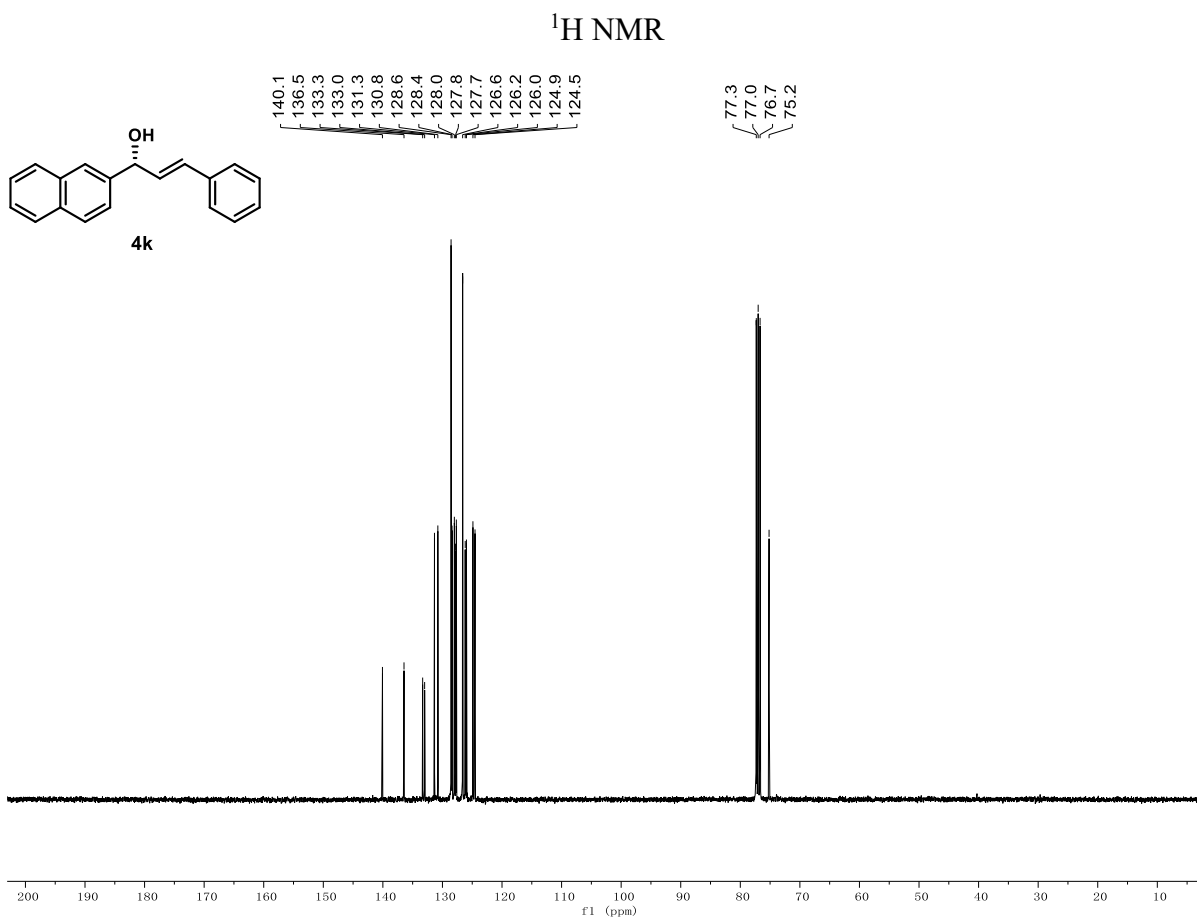

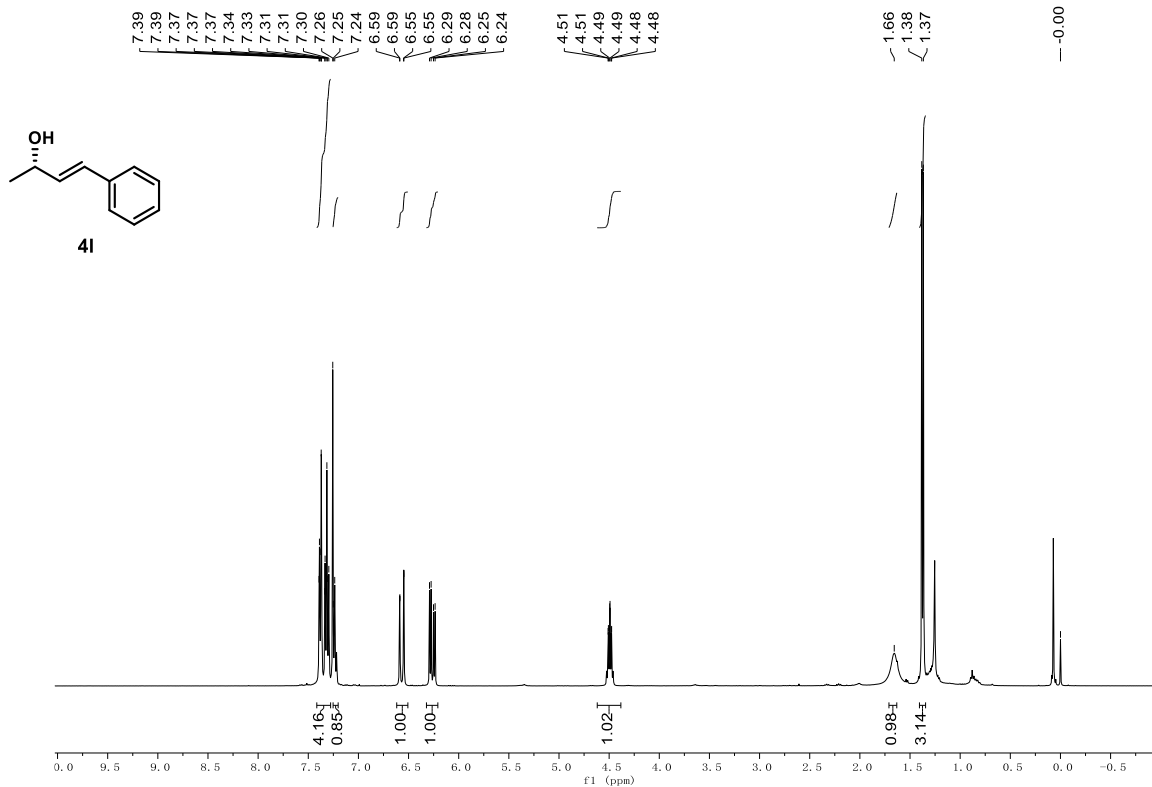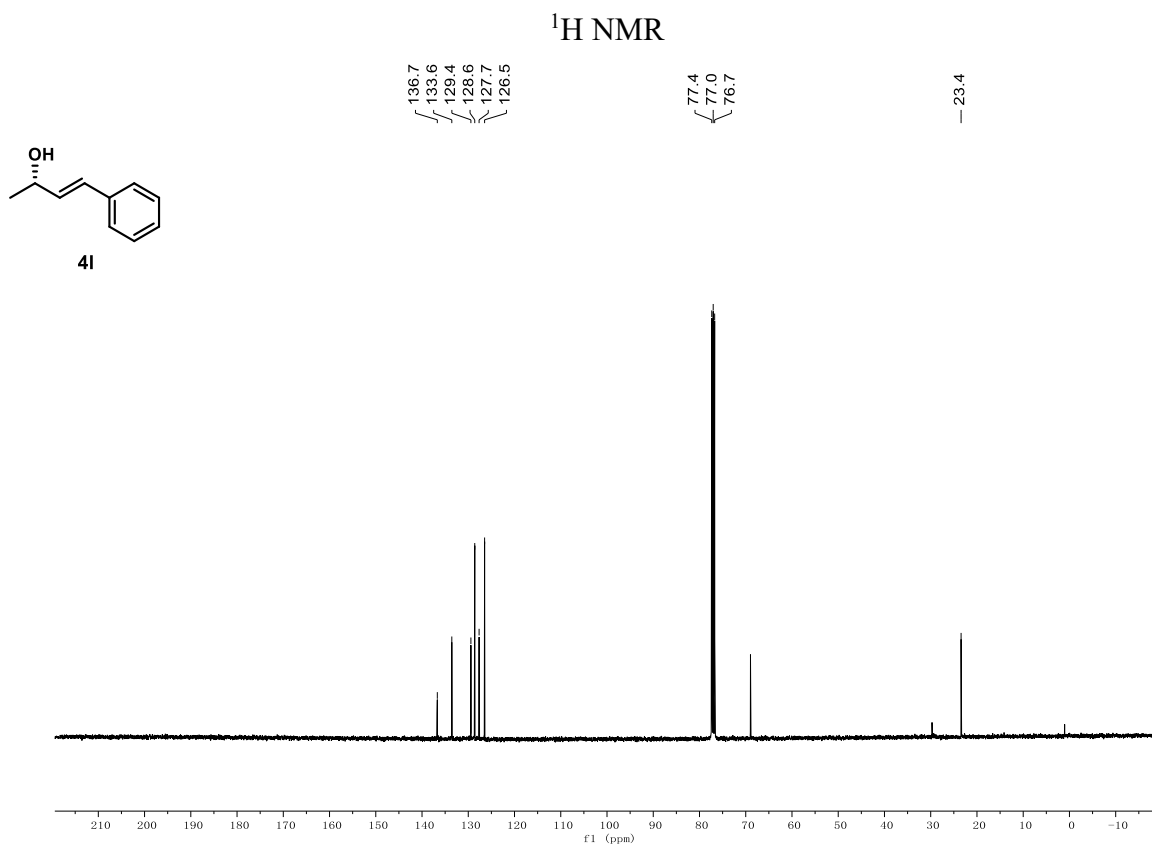

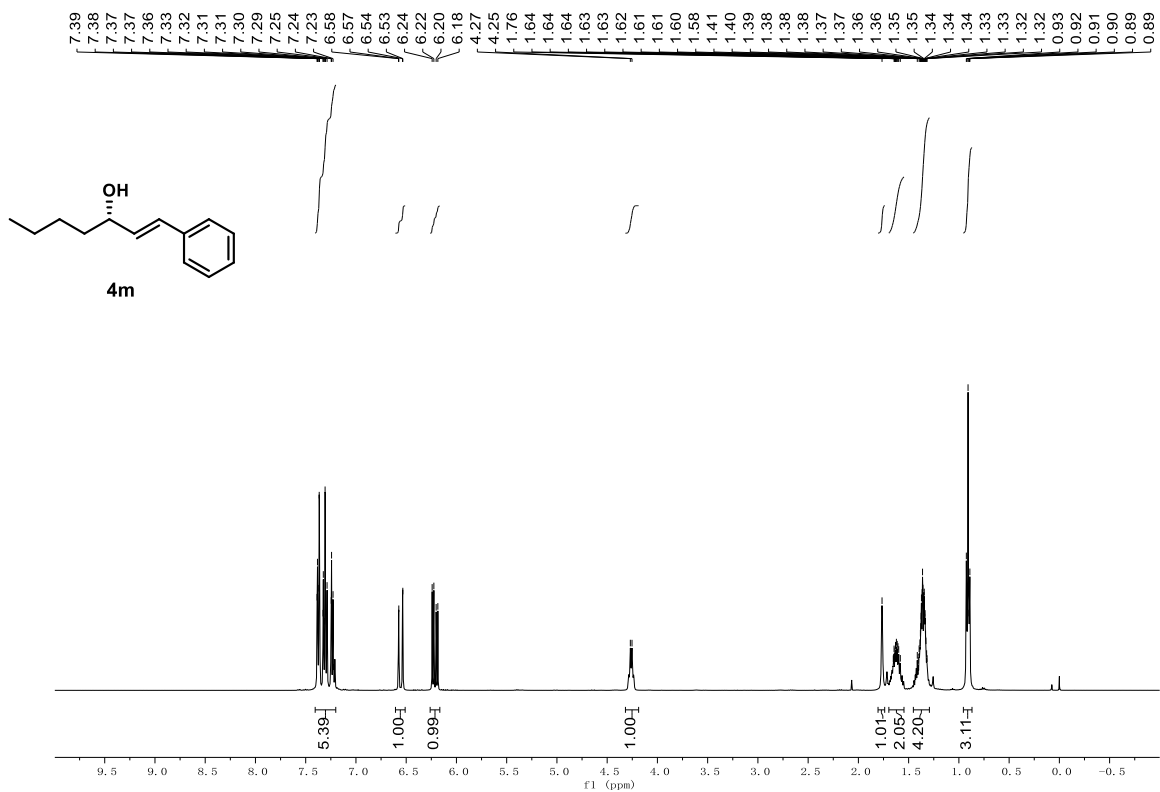

<sup>1</sup>H NMR

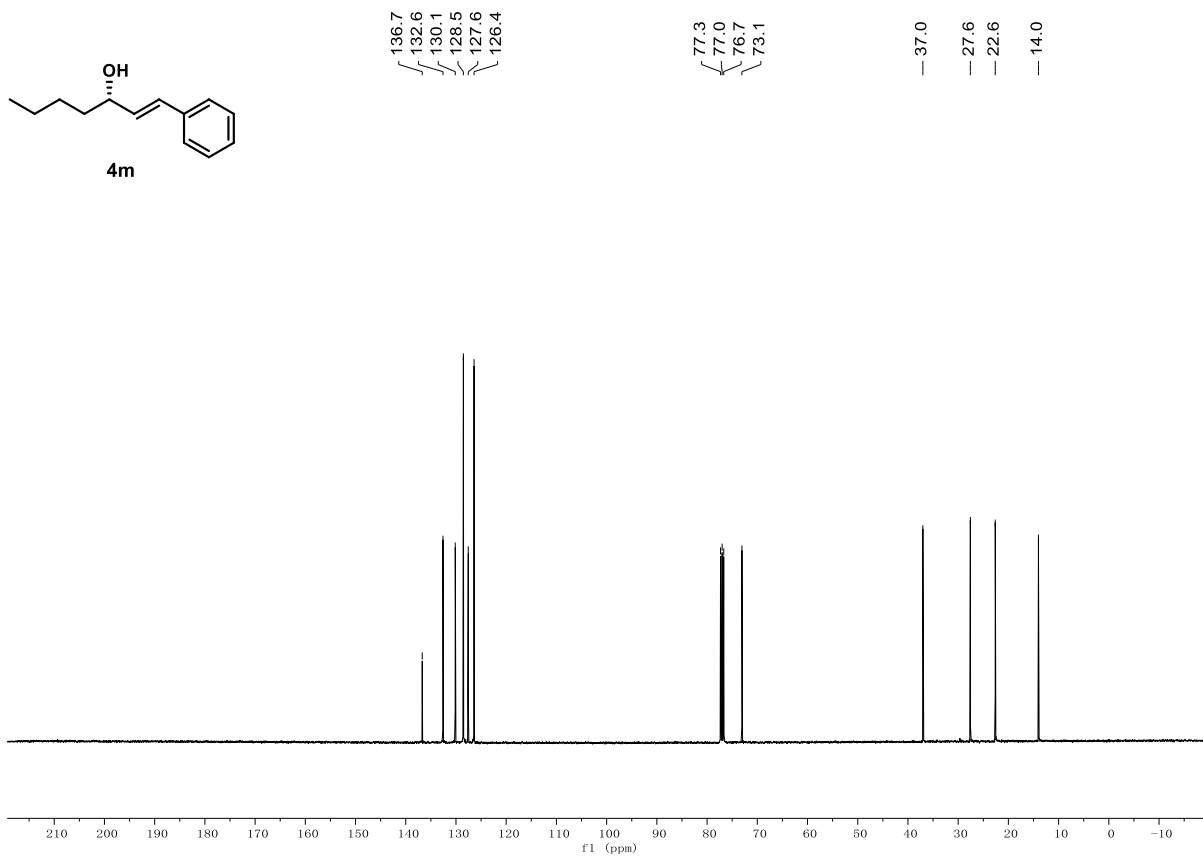

<sup>13</sup>C NMR

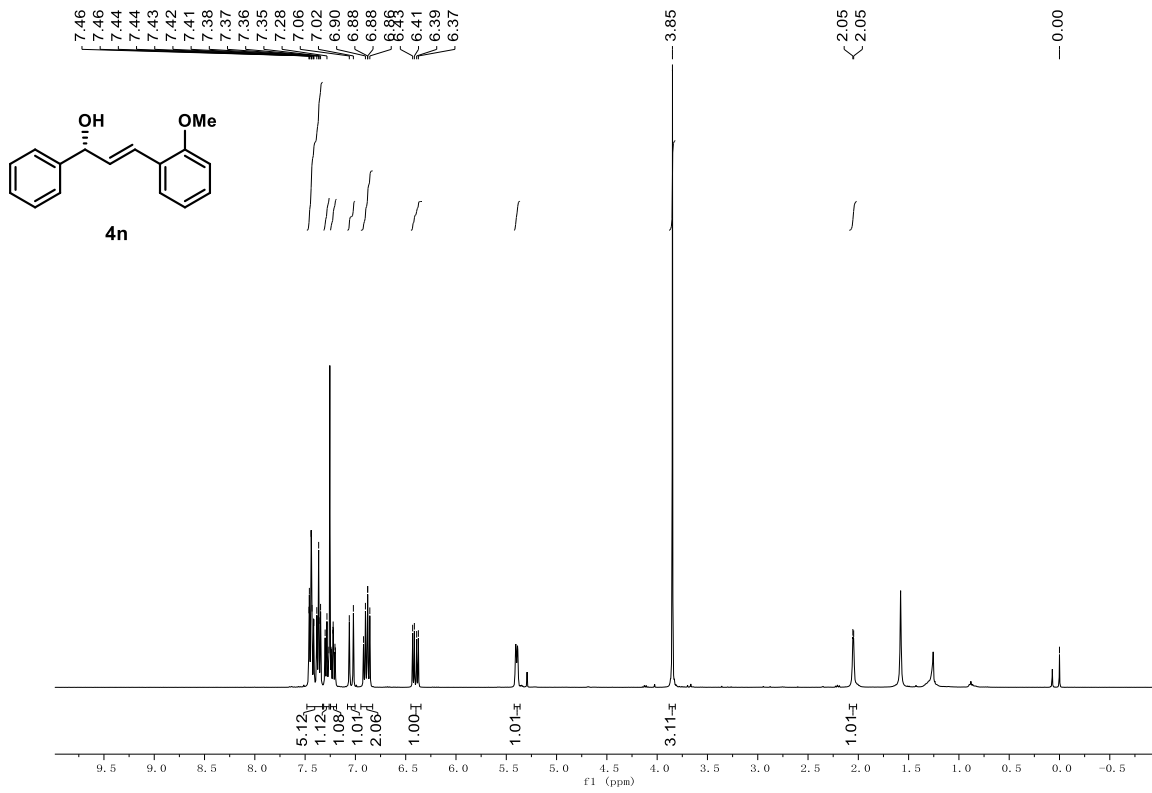

**<sup>1</sup>H NMR**

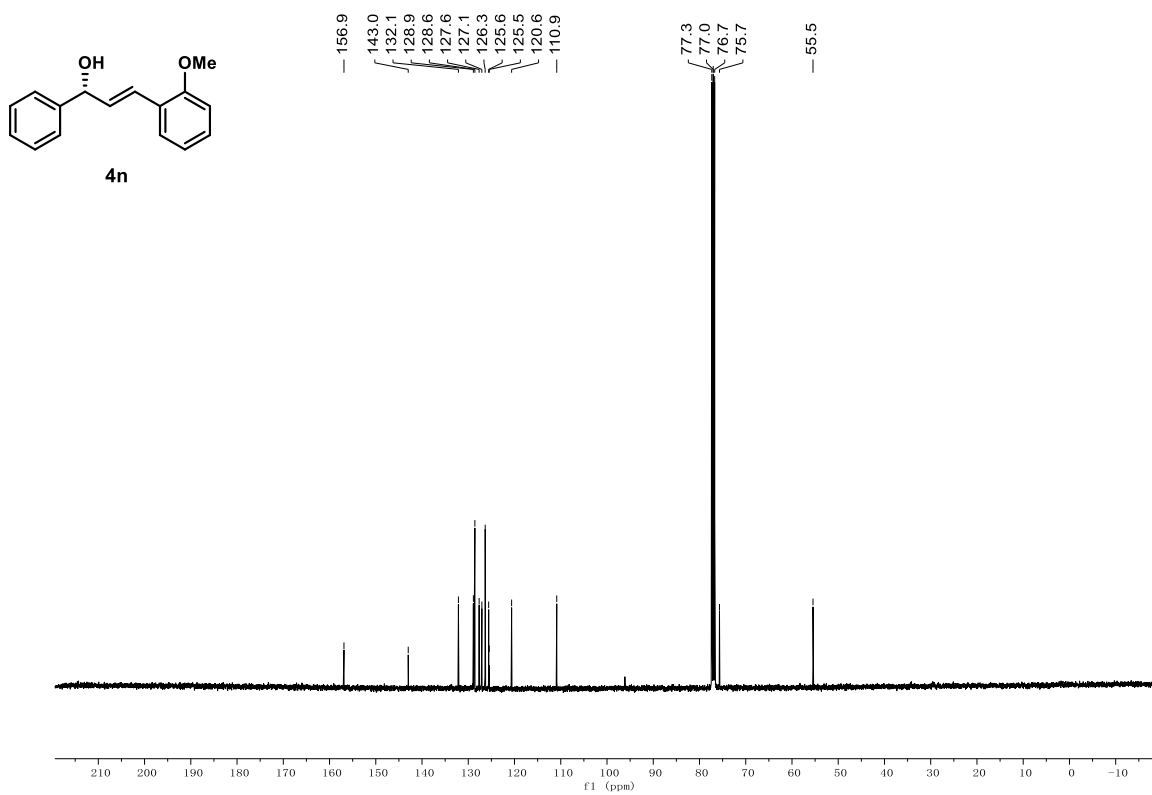

**<sup>13</sup>C NMR**

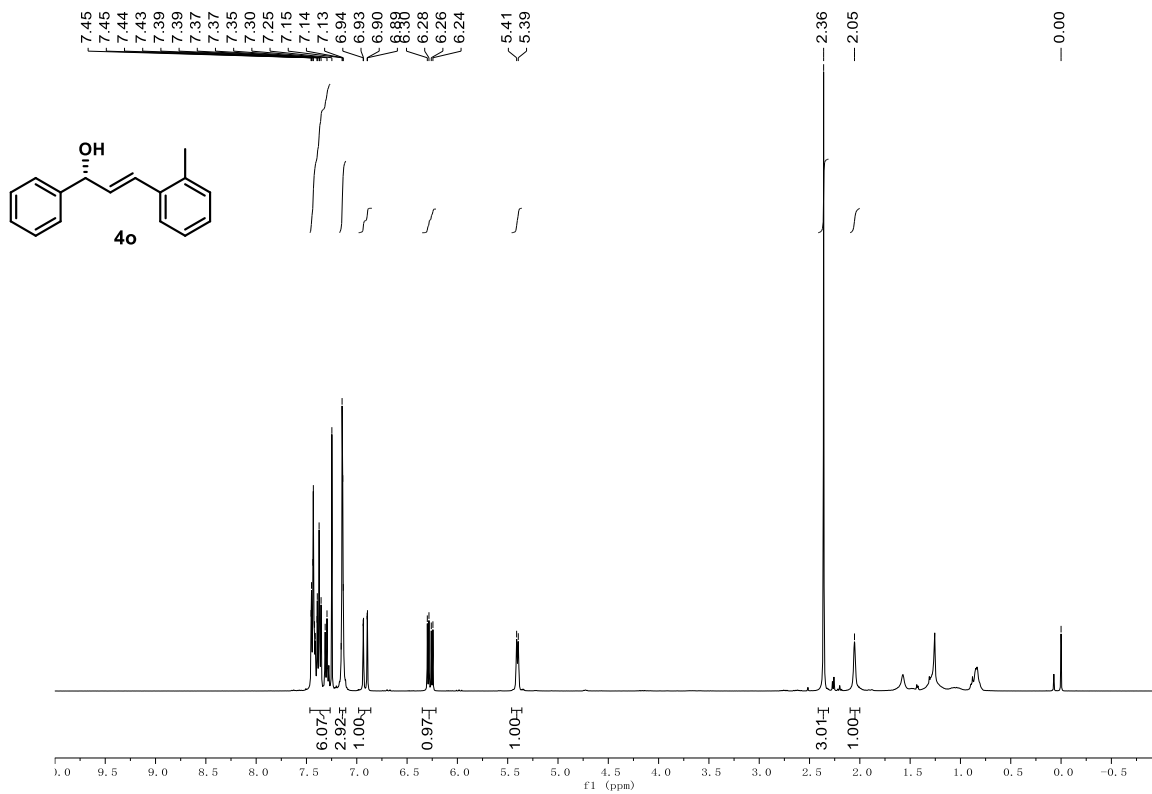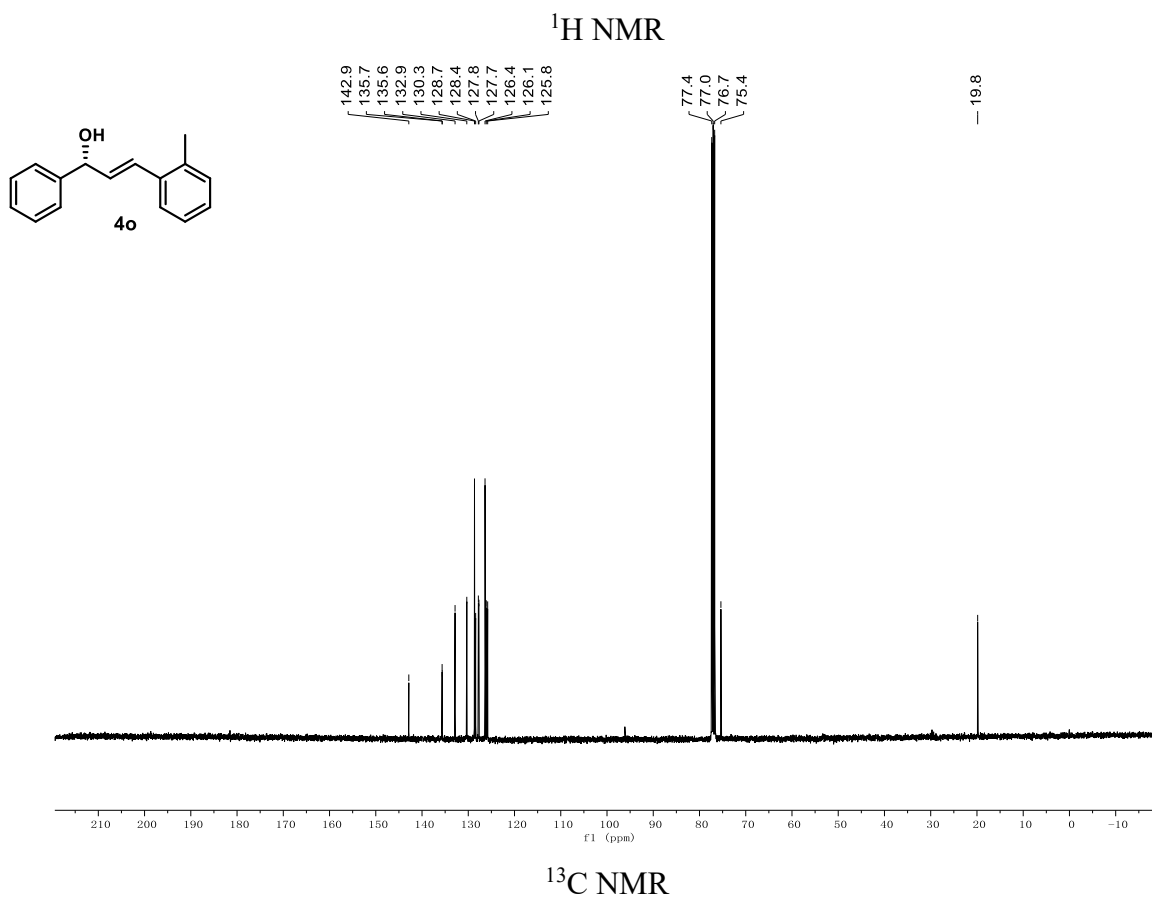

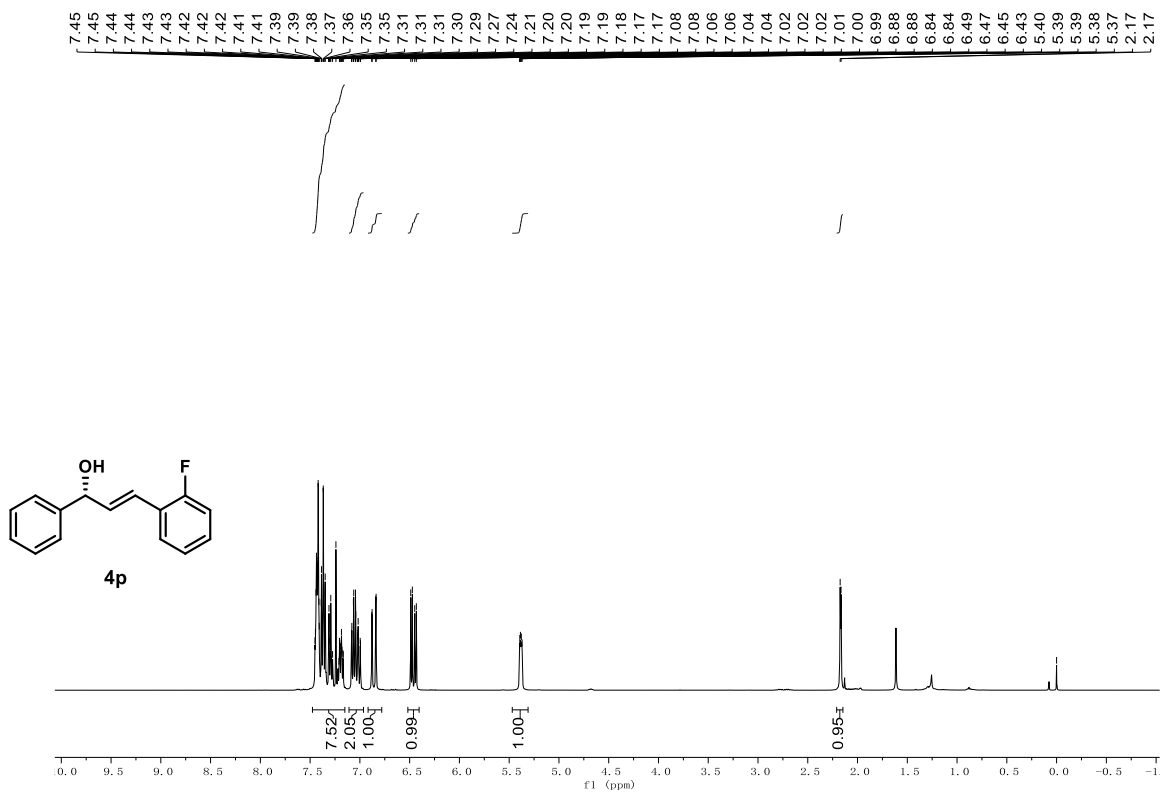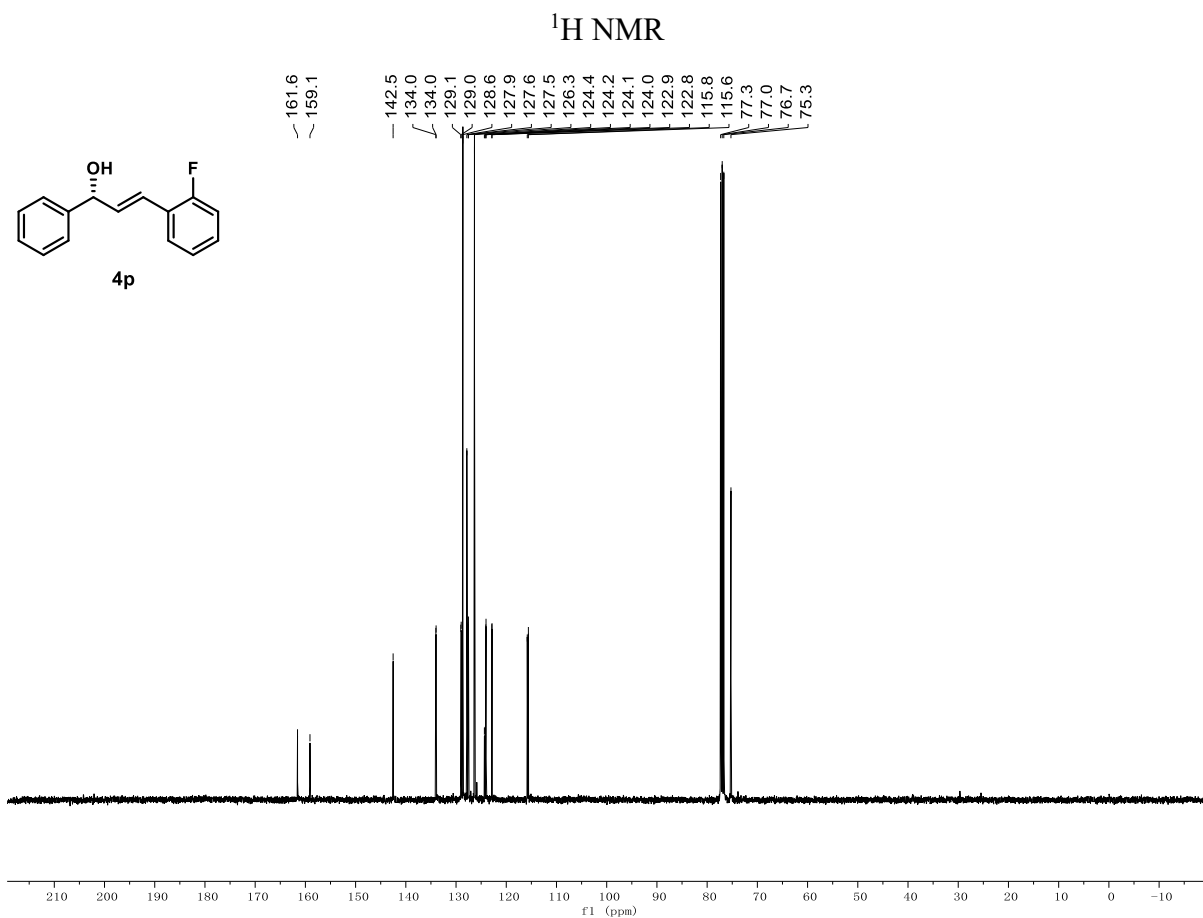

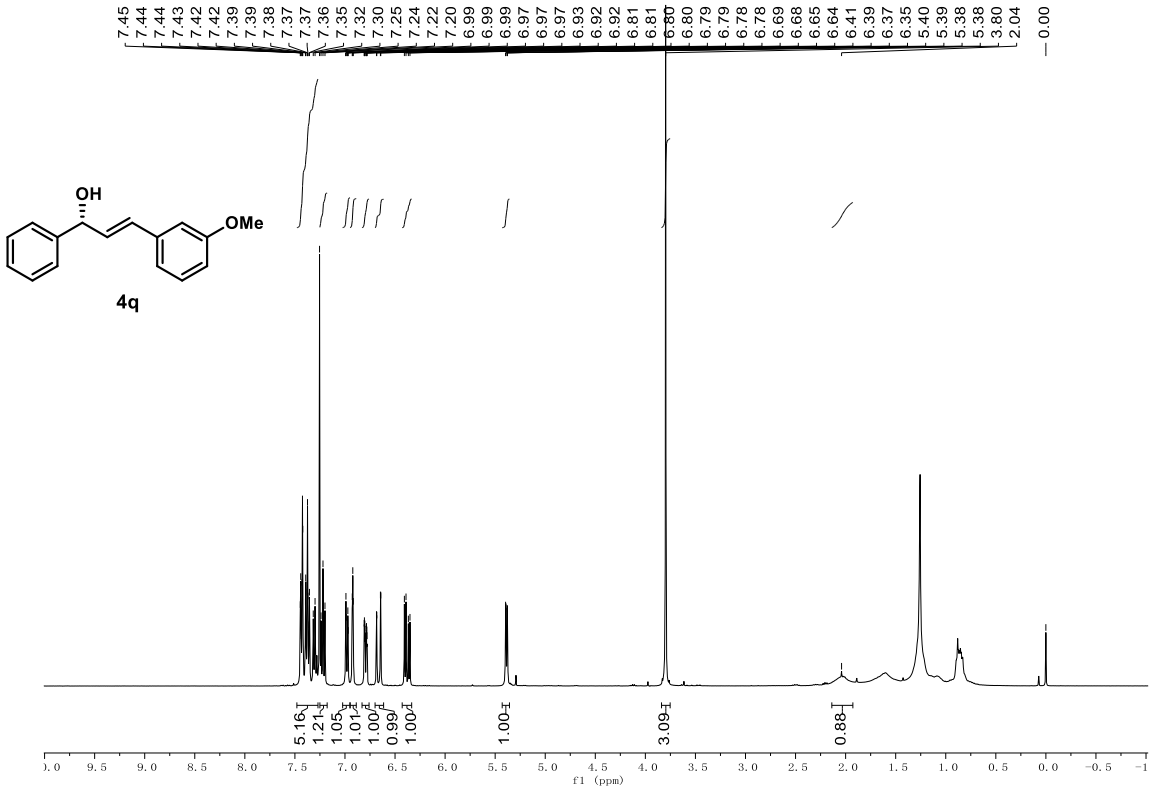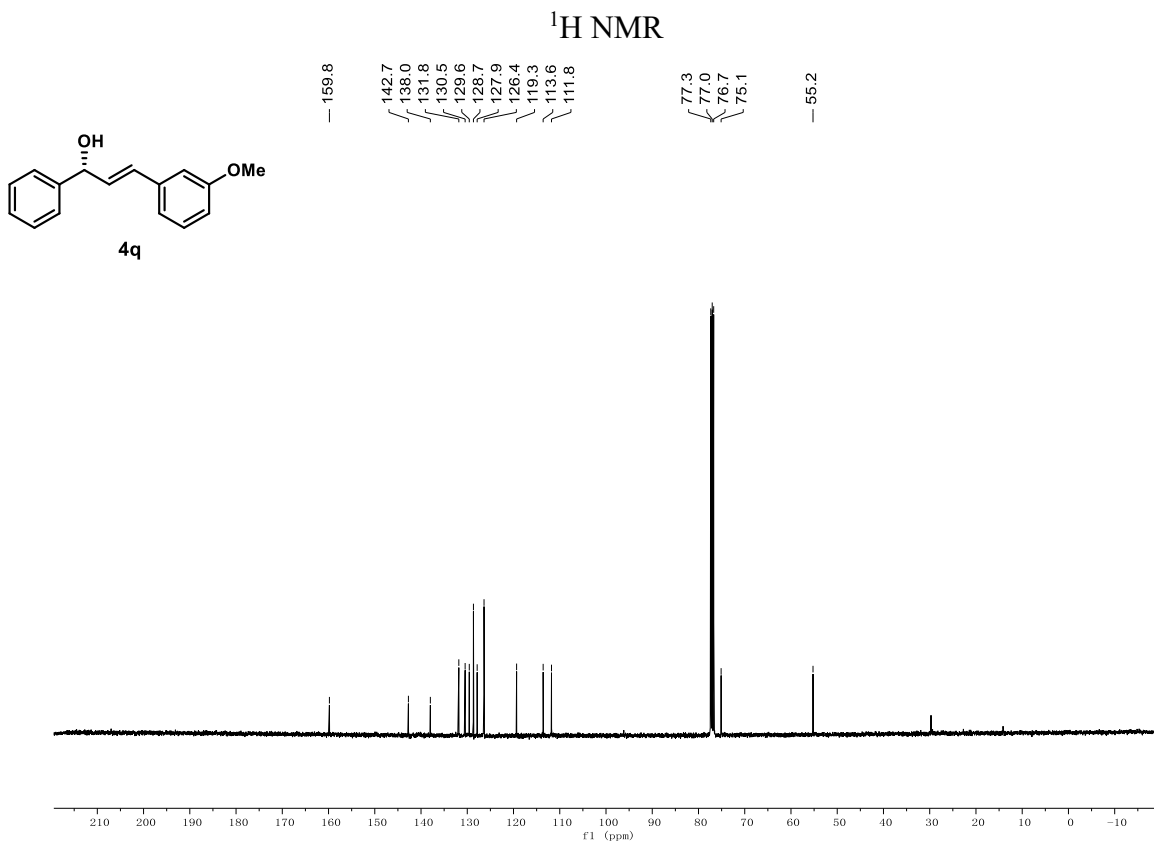

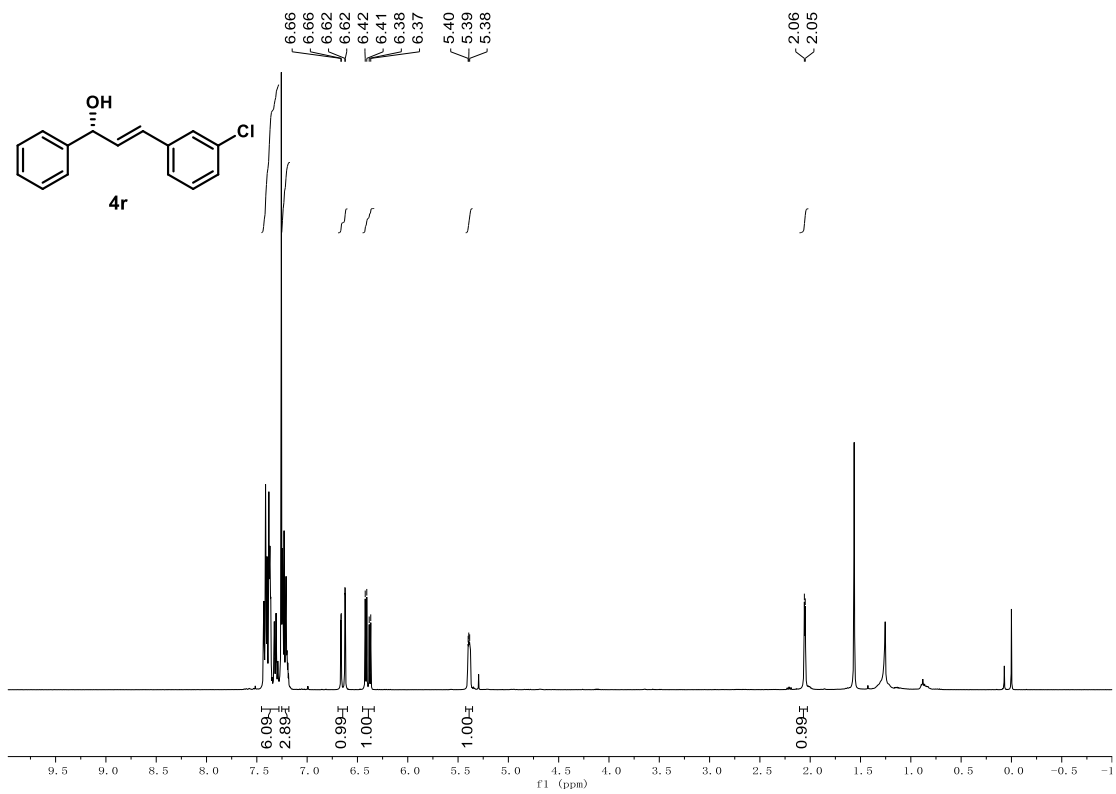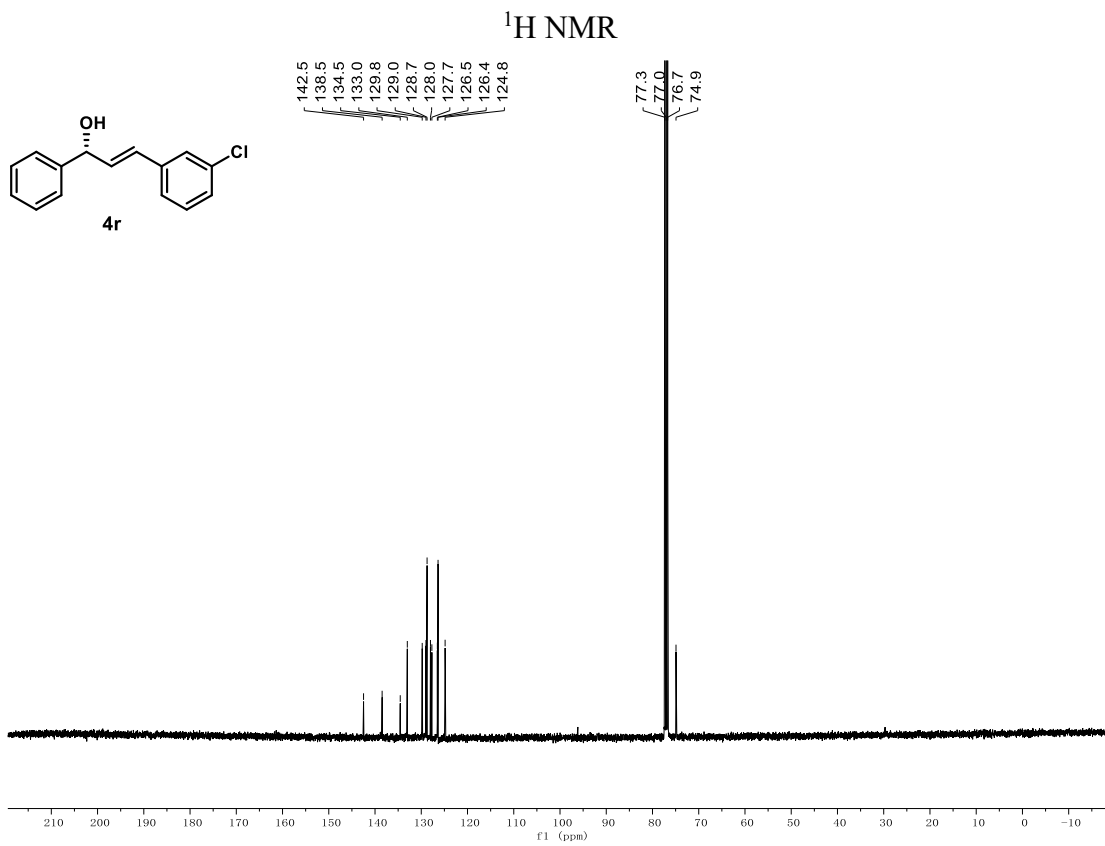

**<sup>13</sup>C NMR**



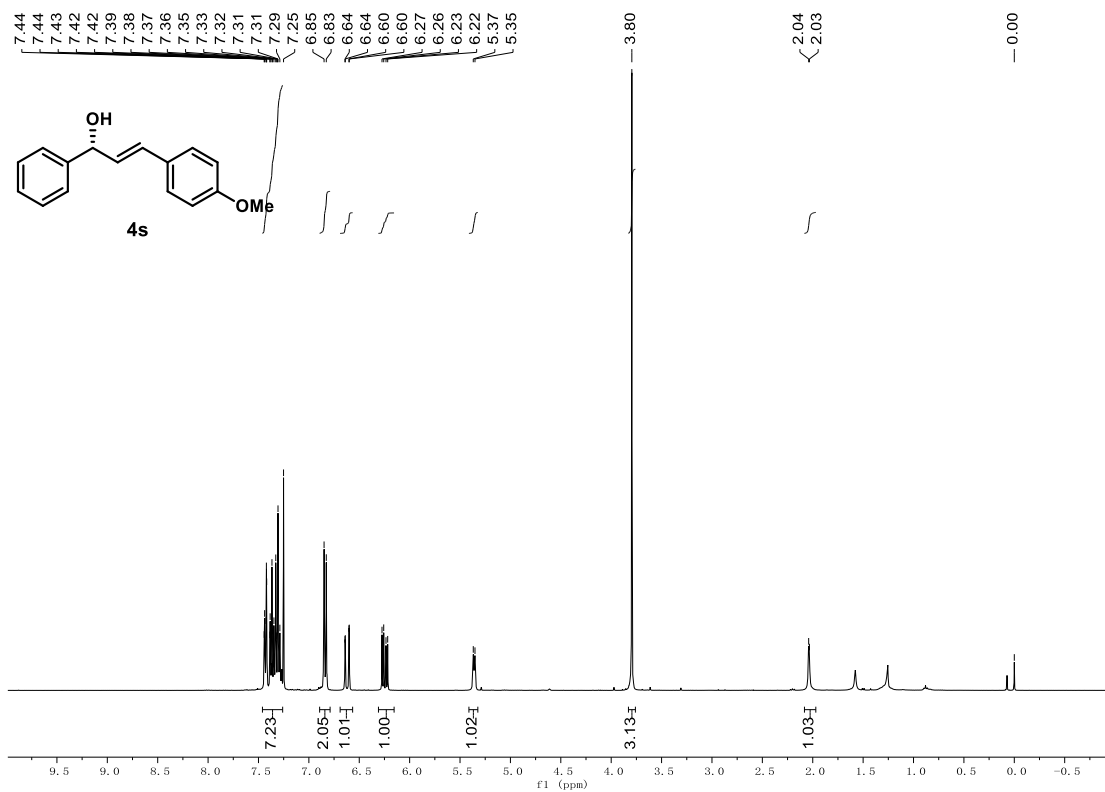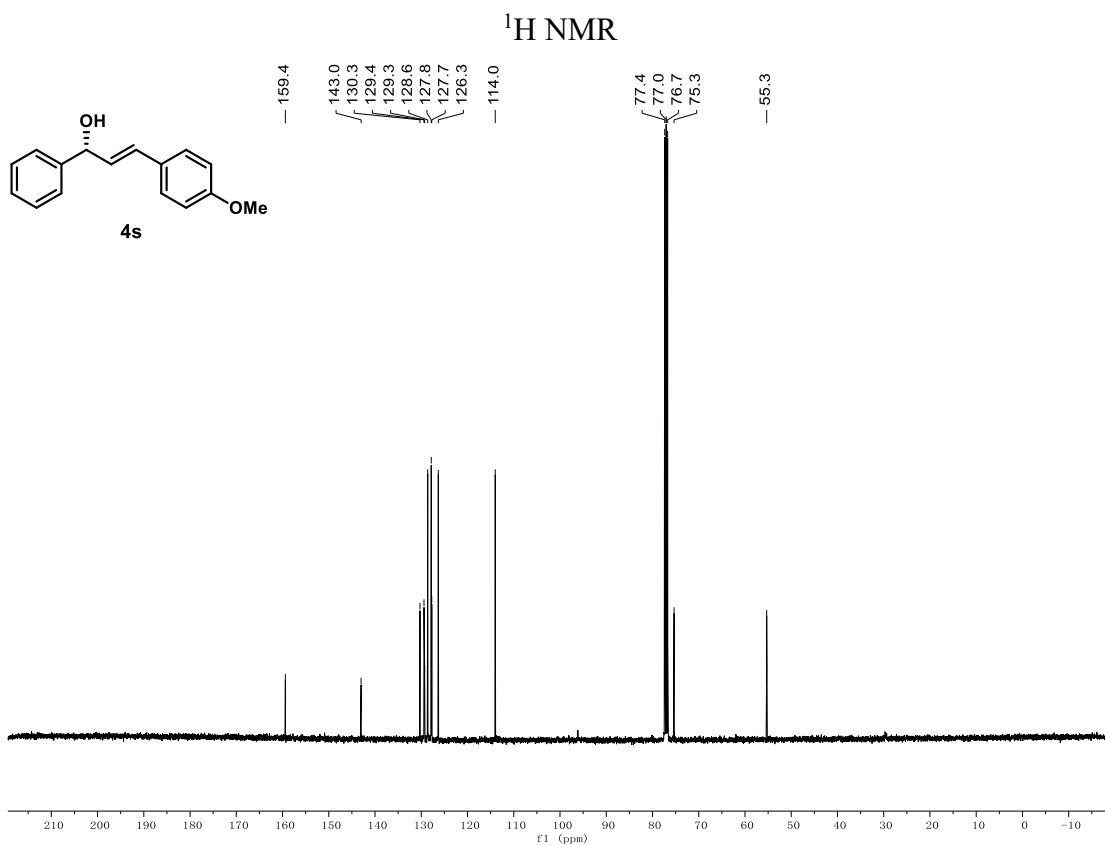

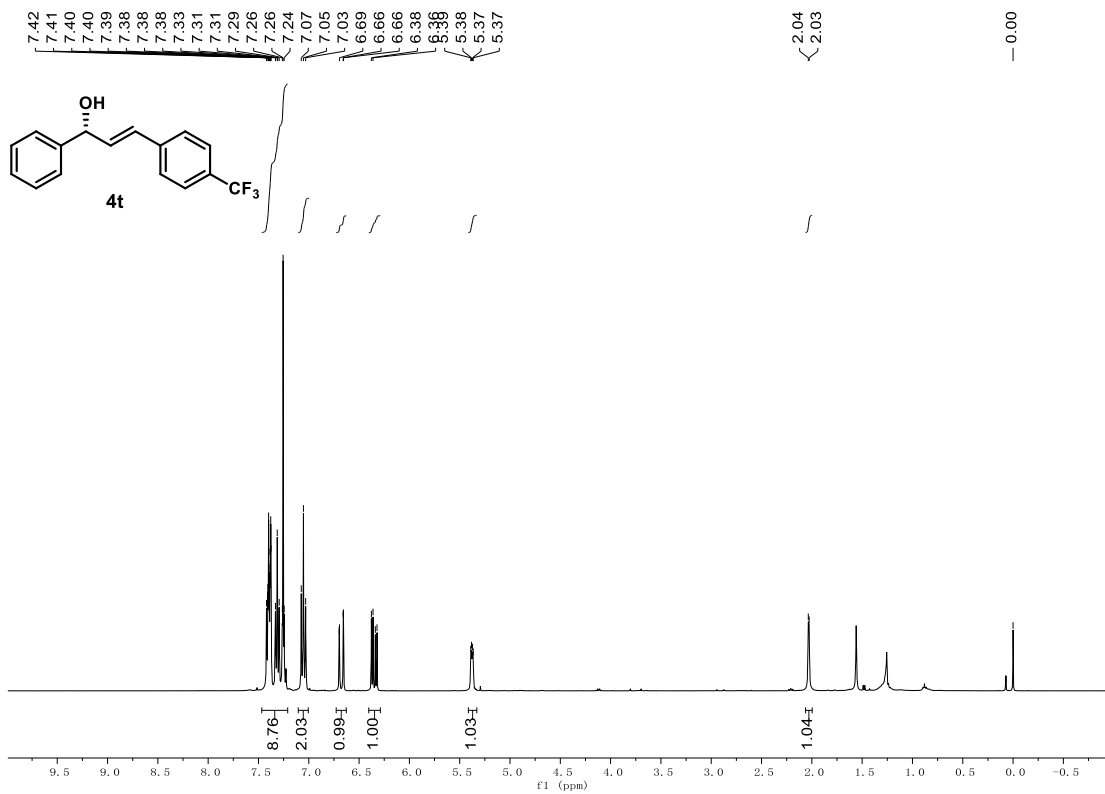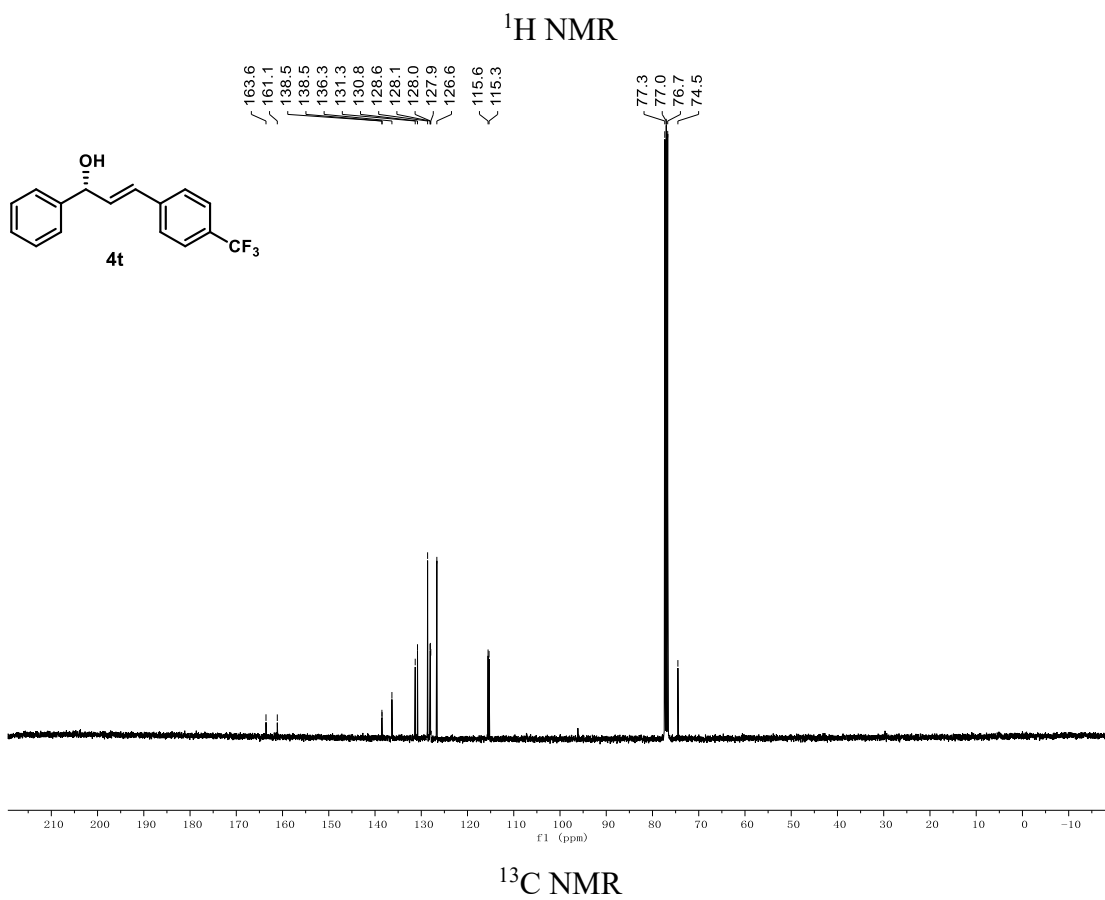

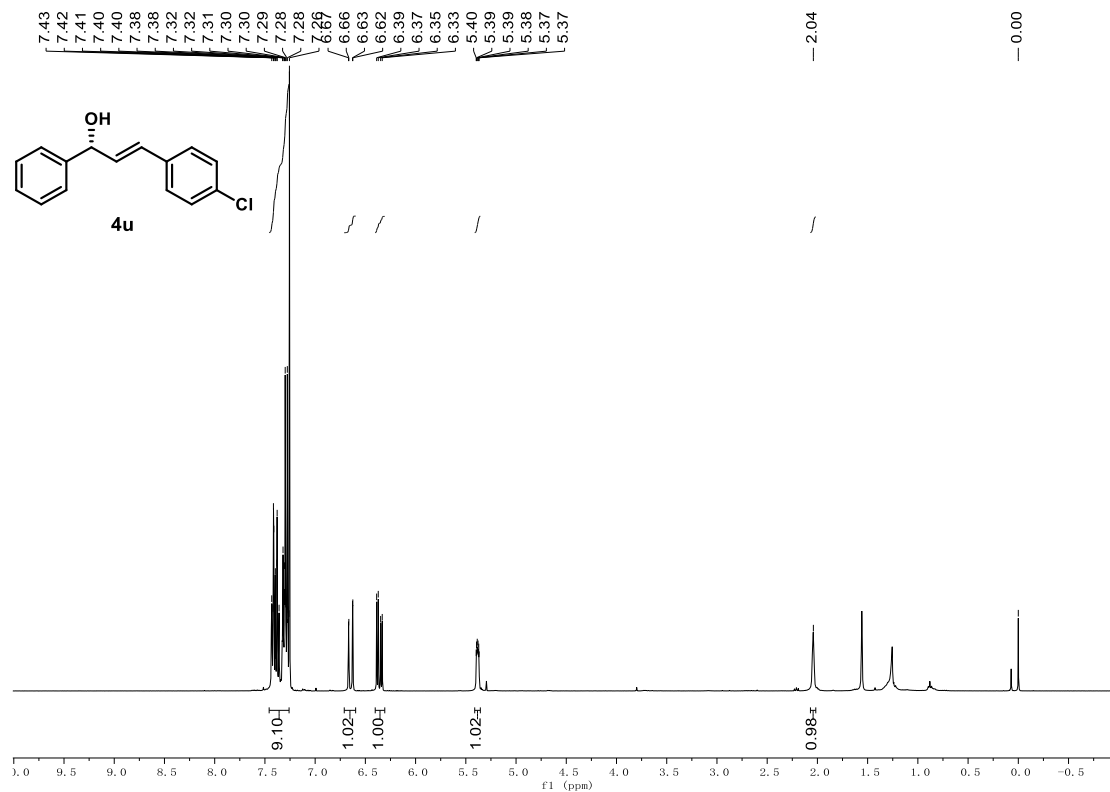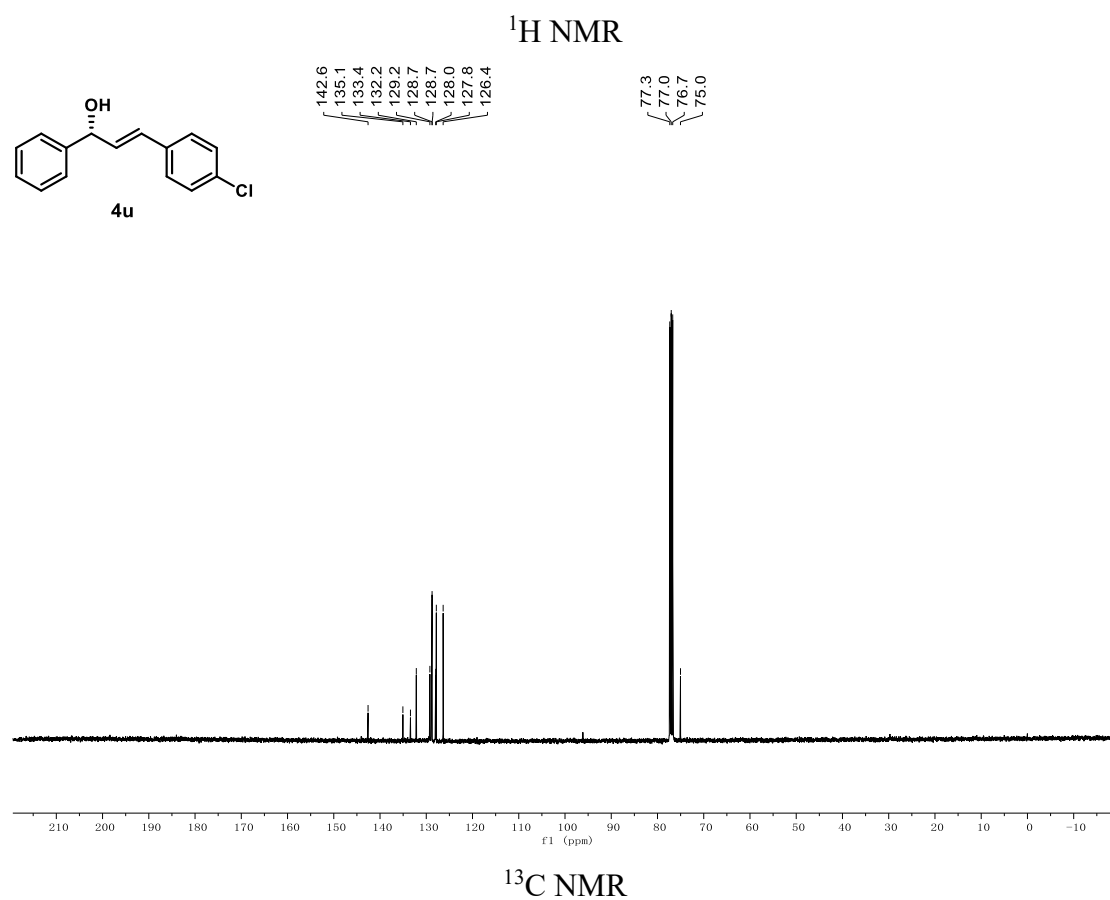

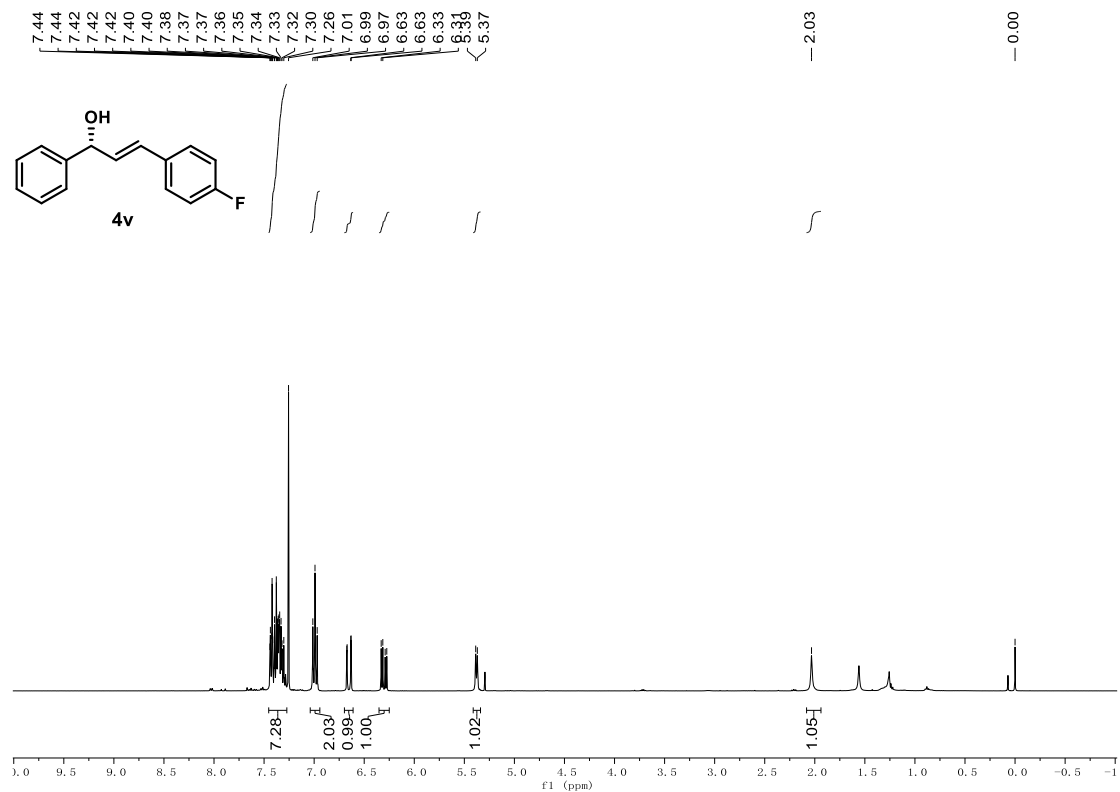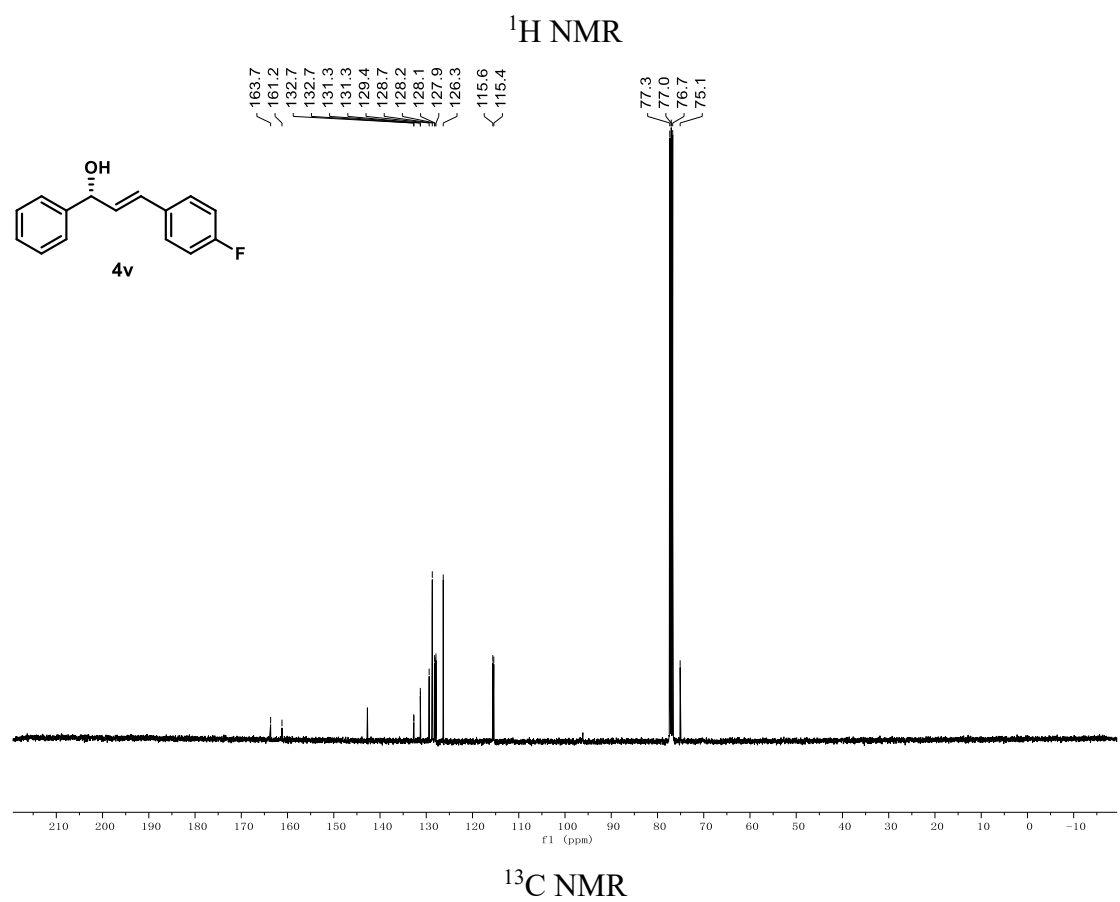

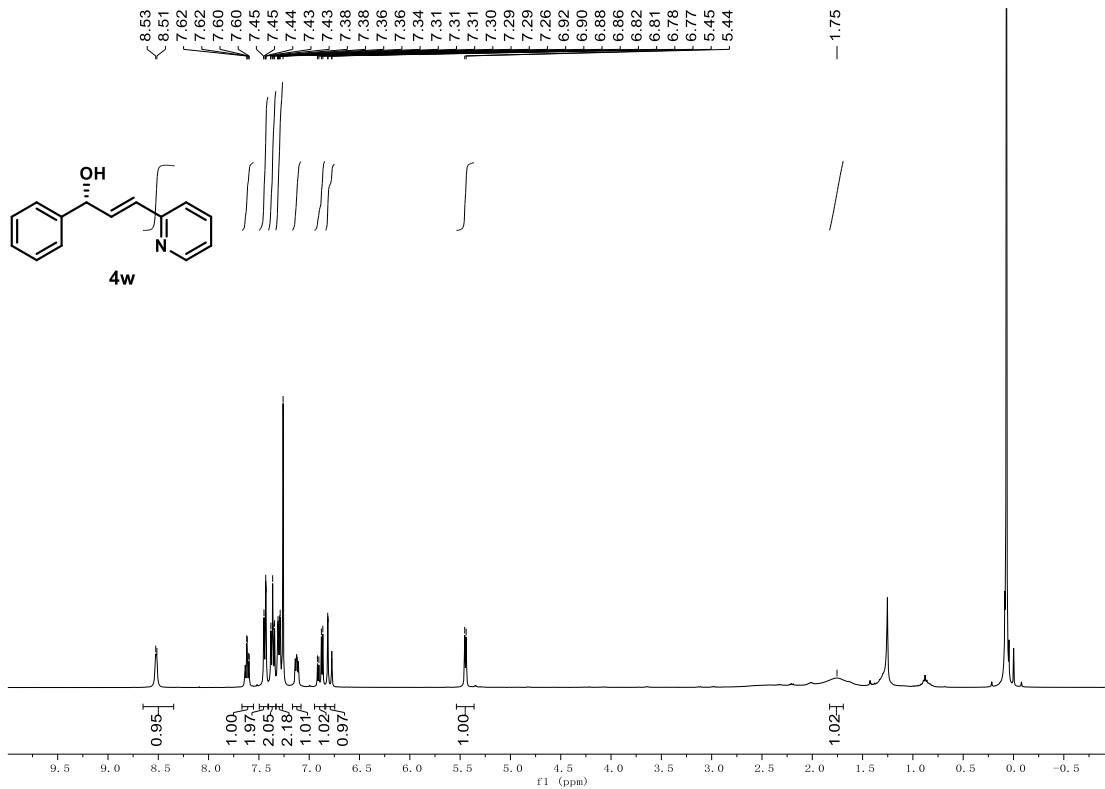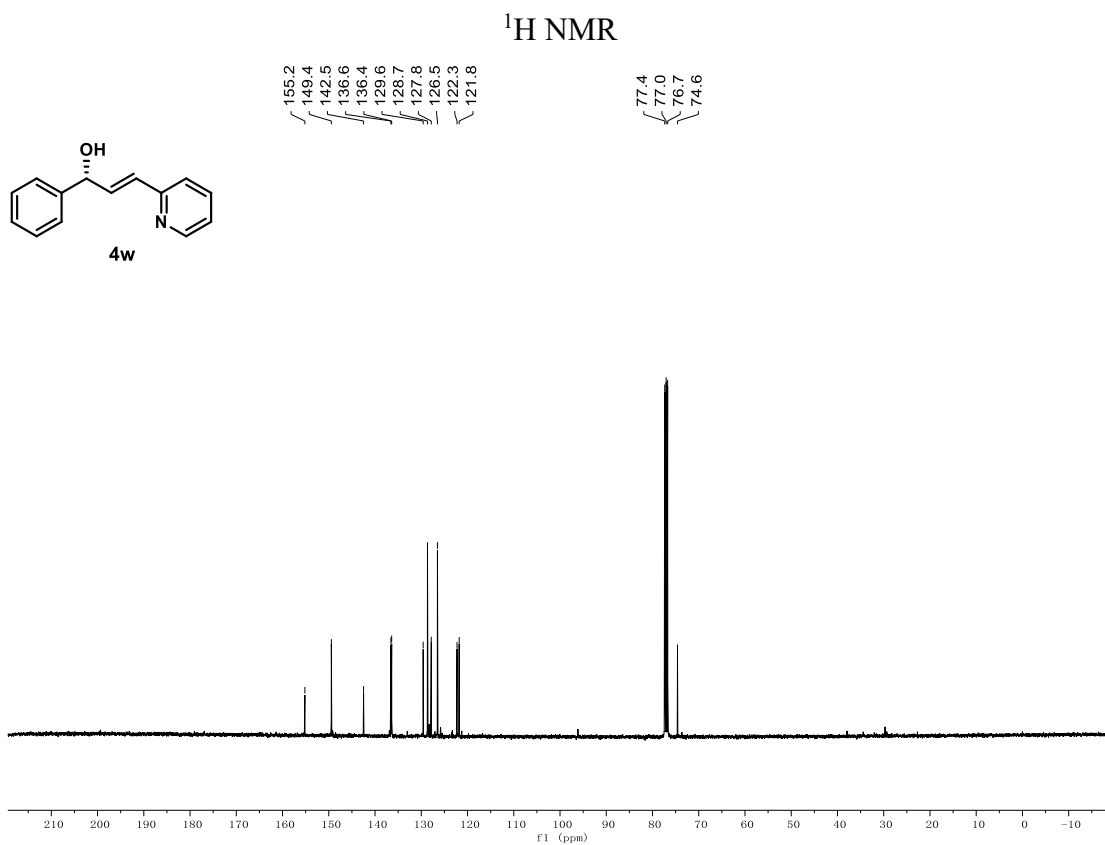

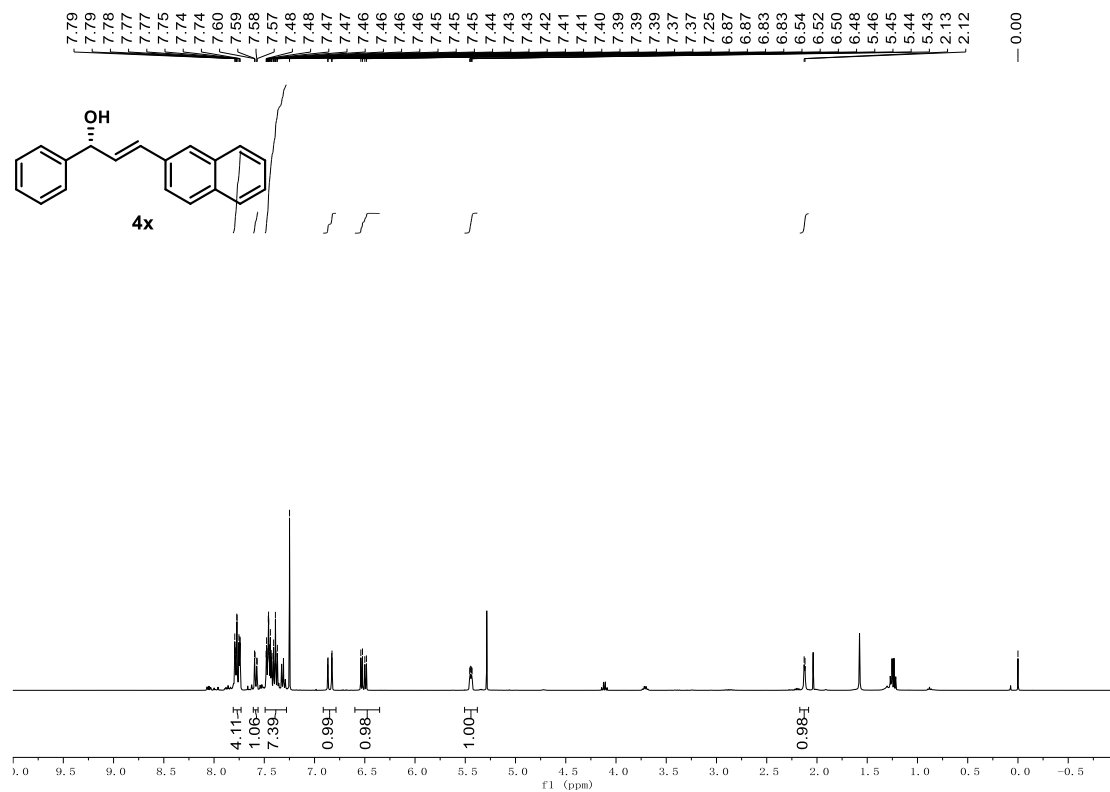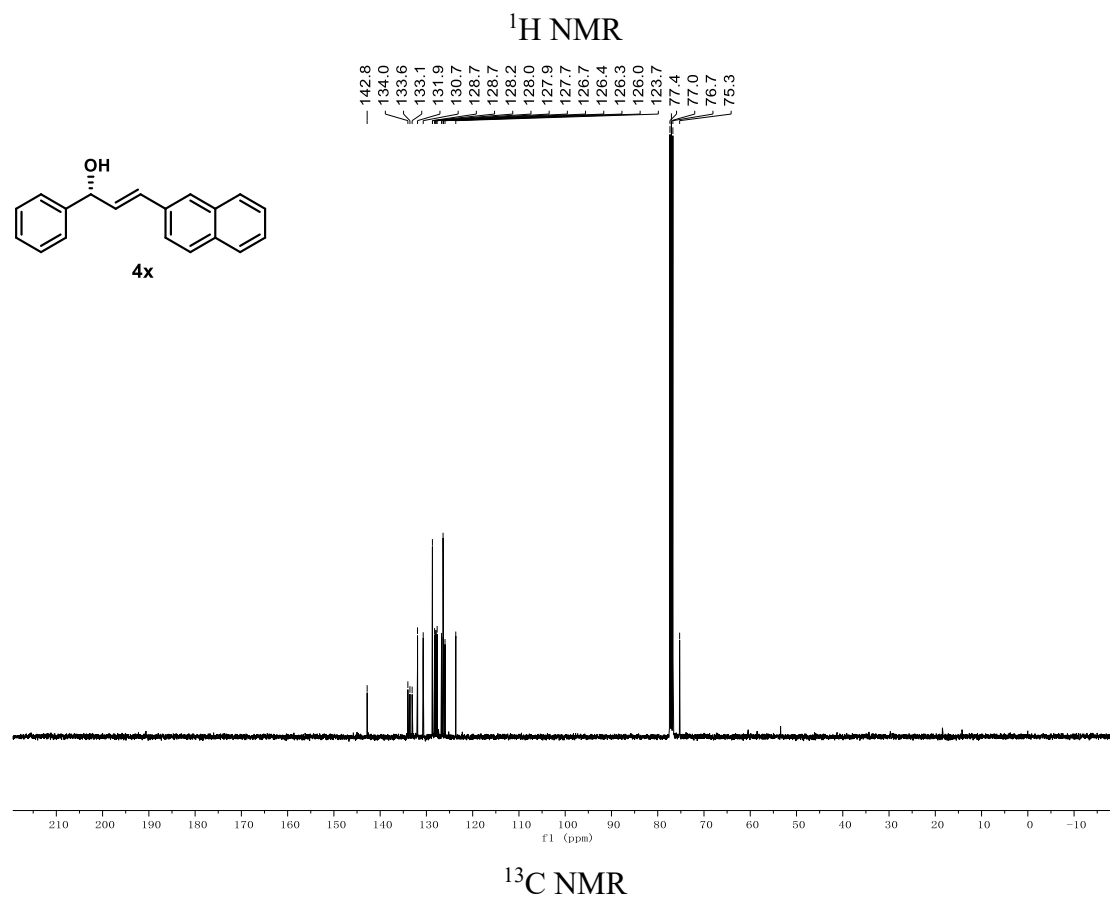

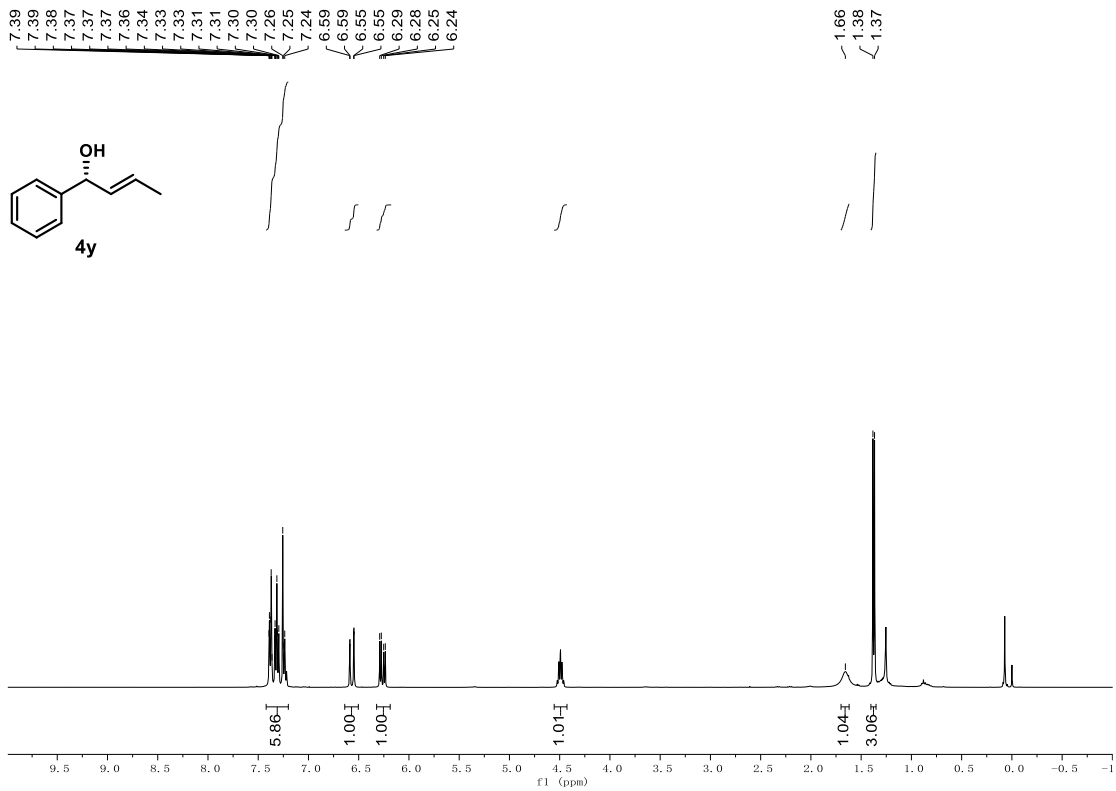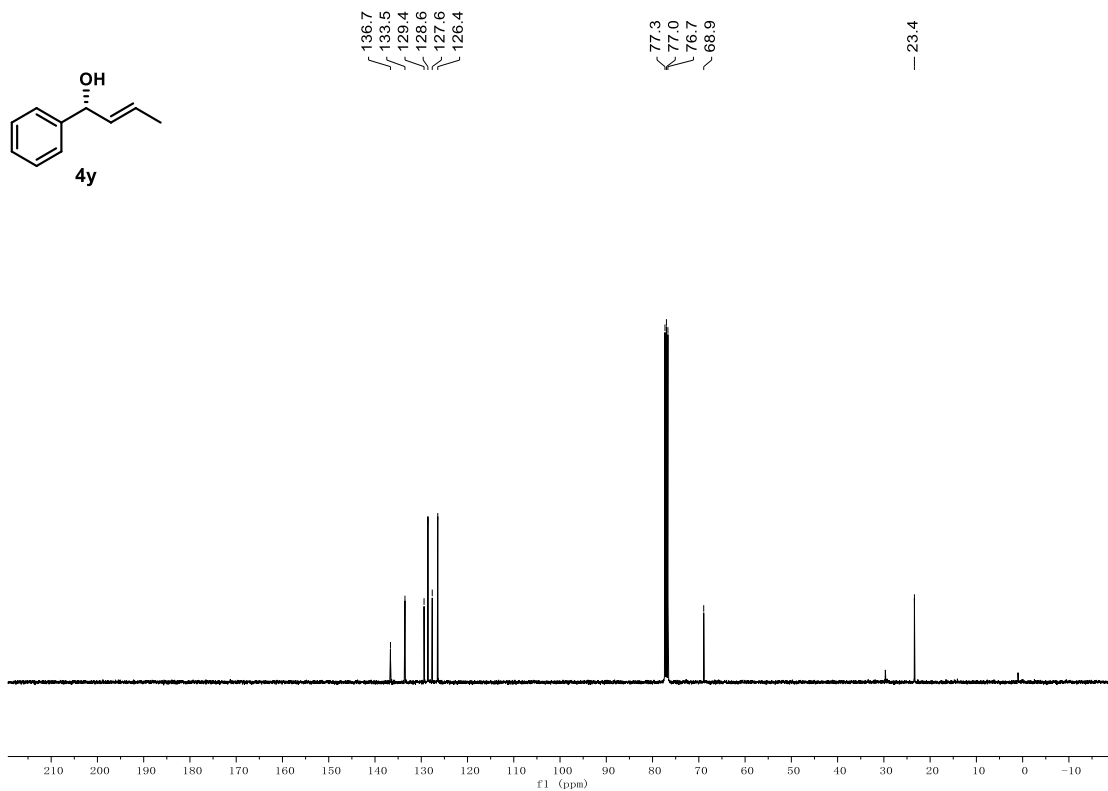

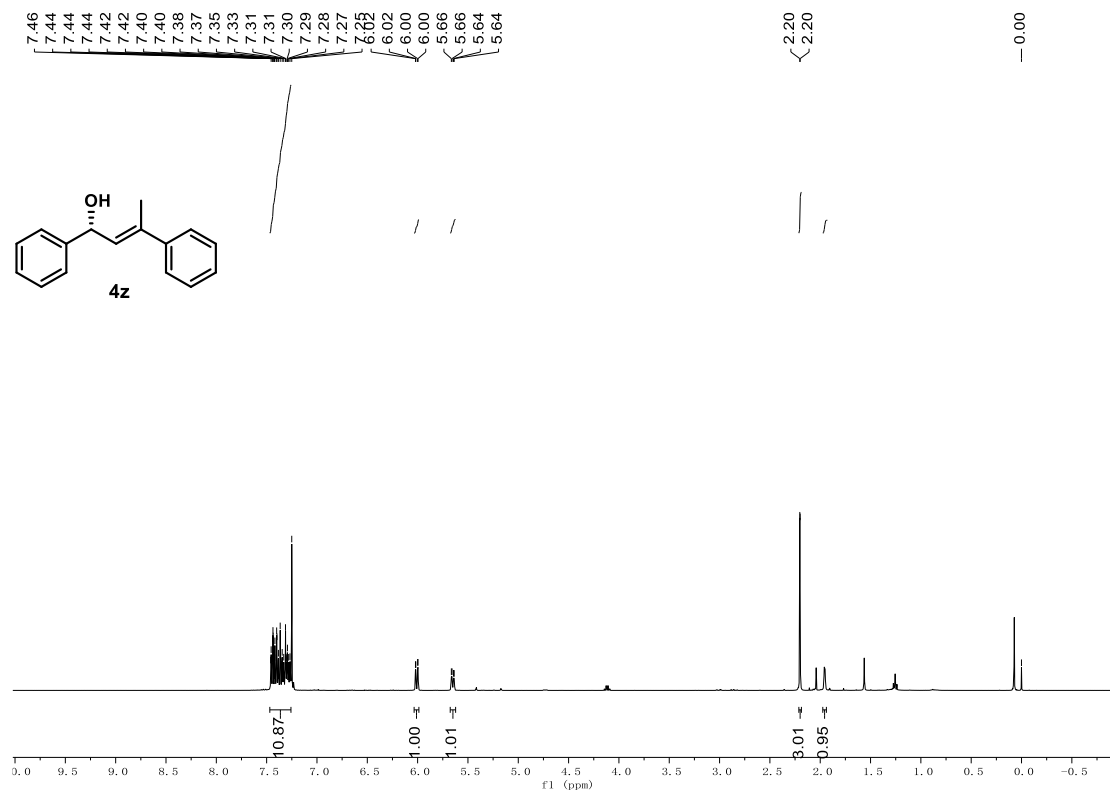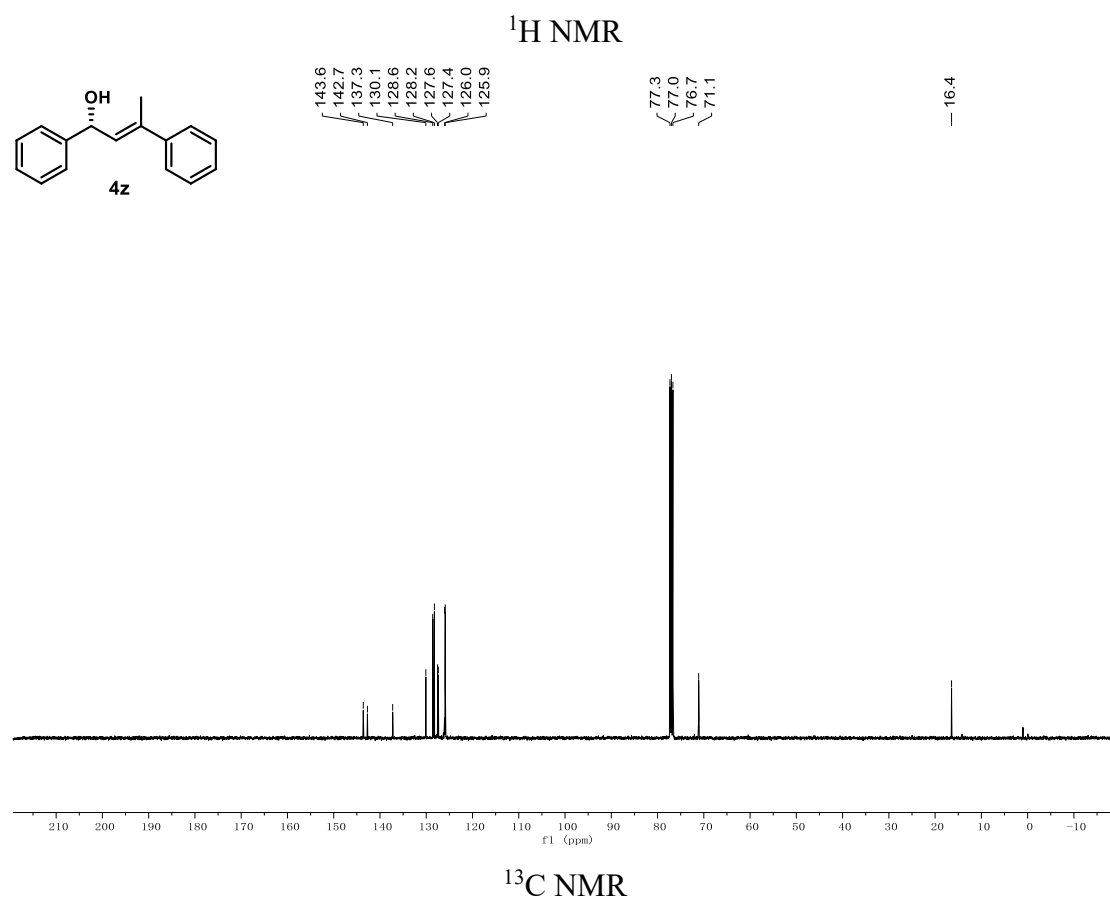



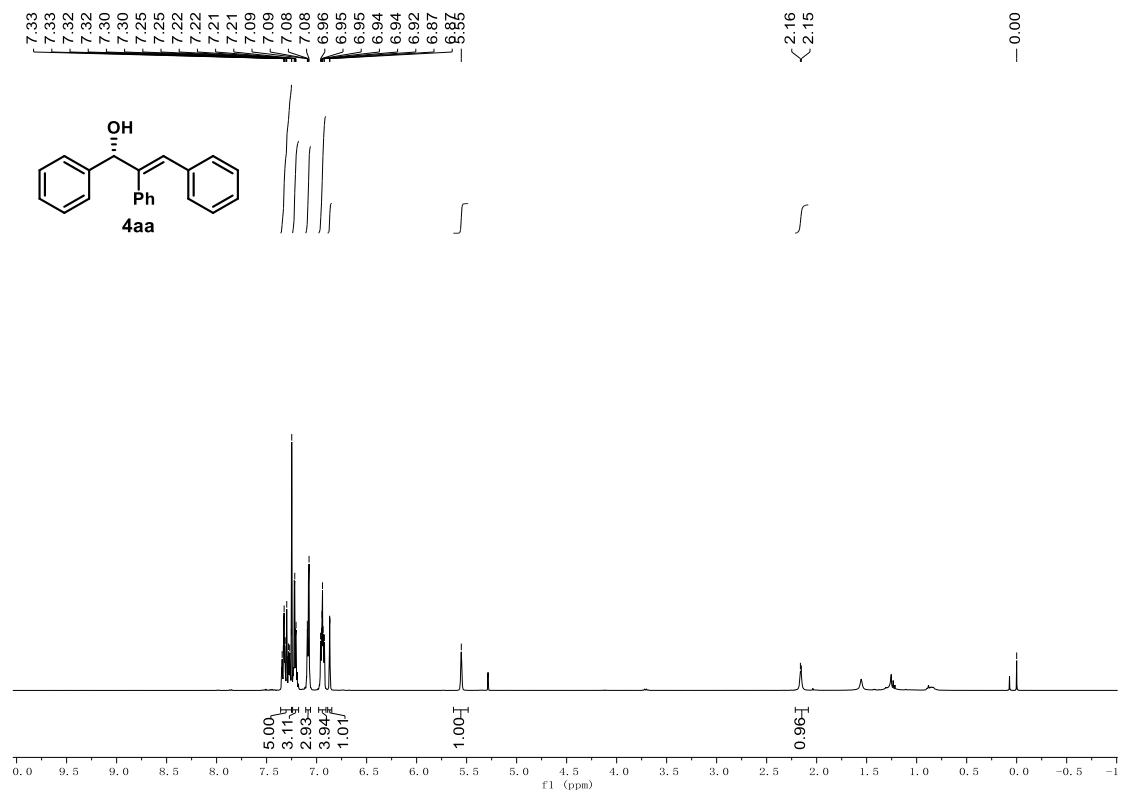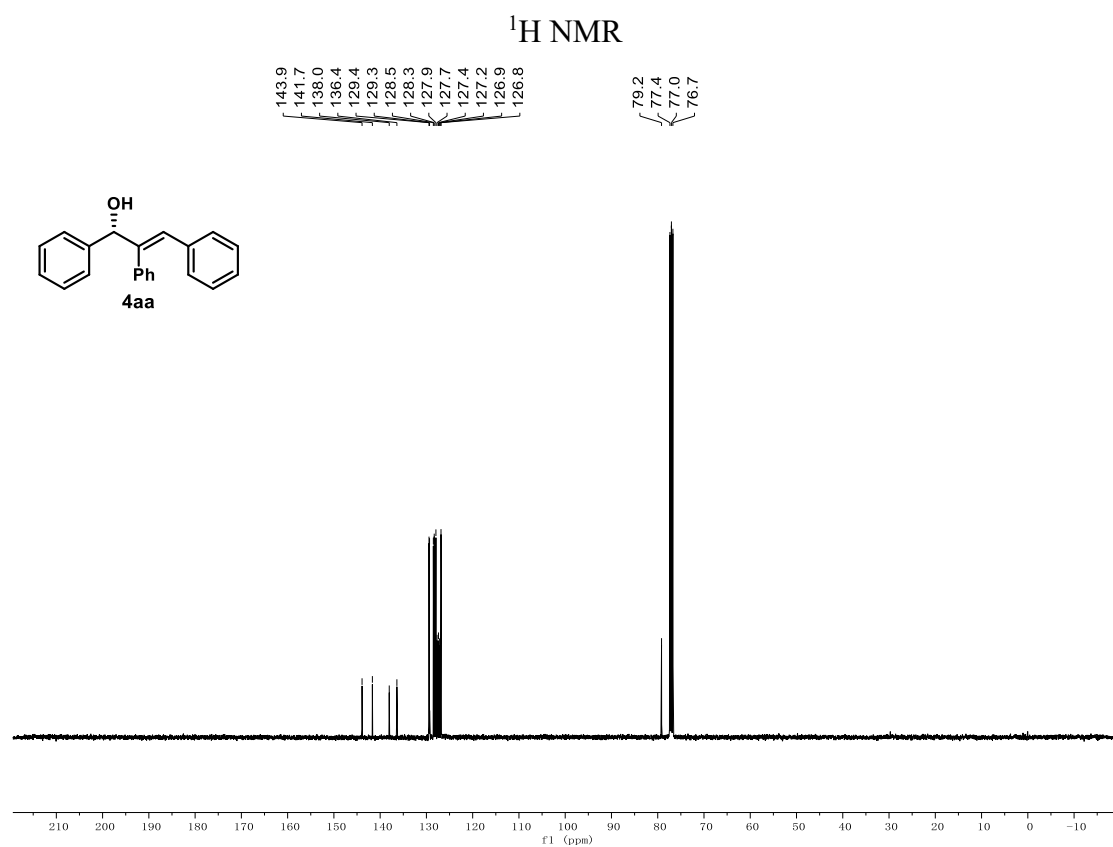

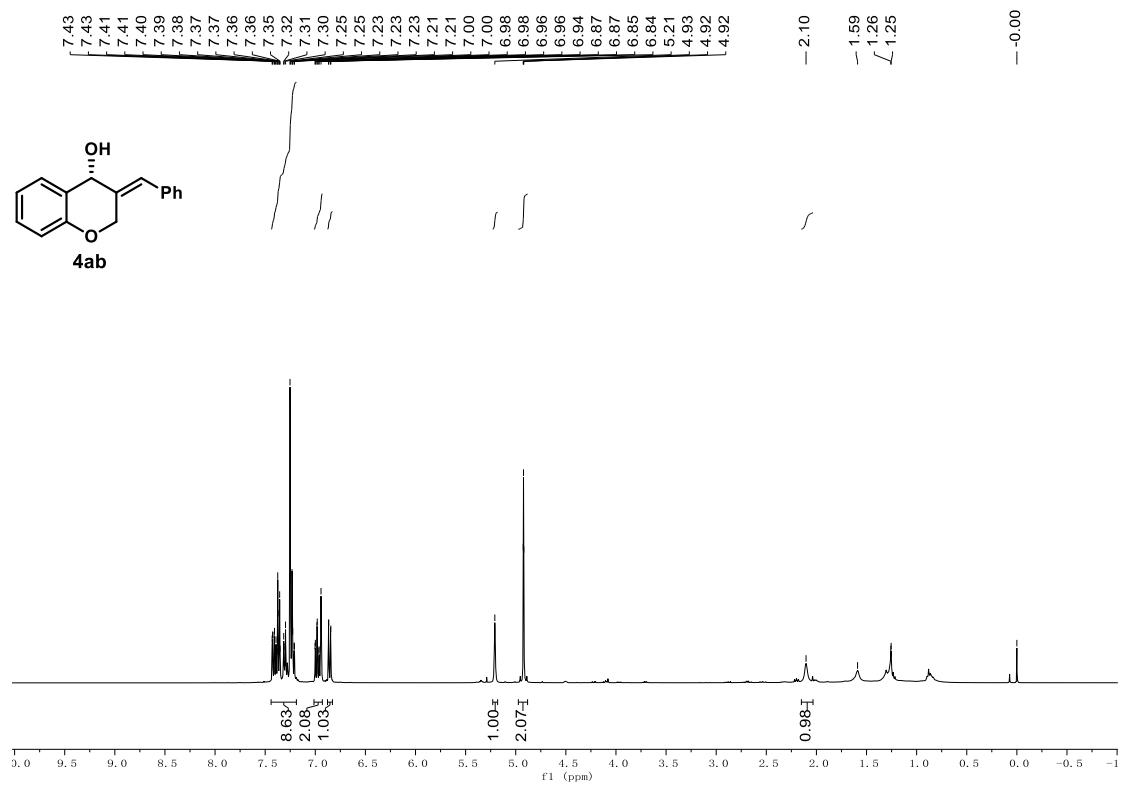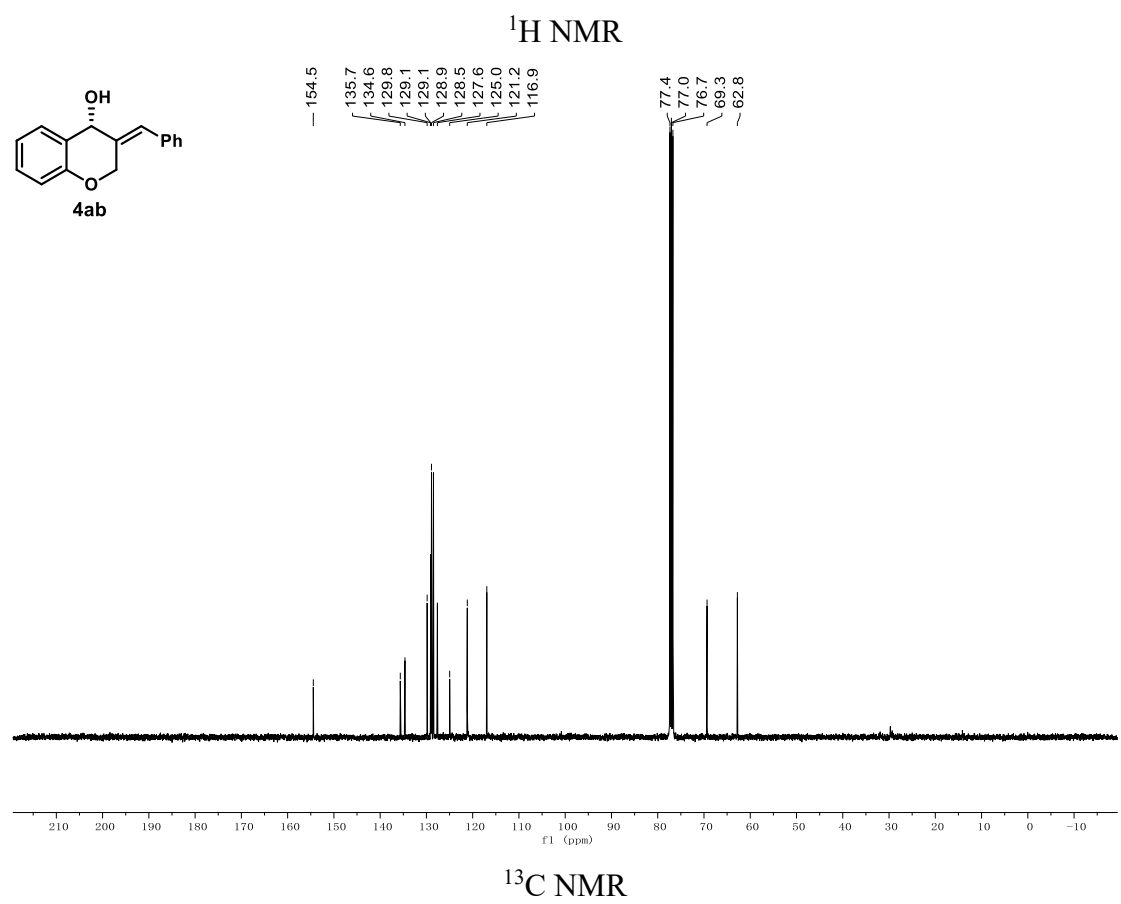

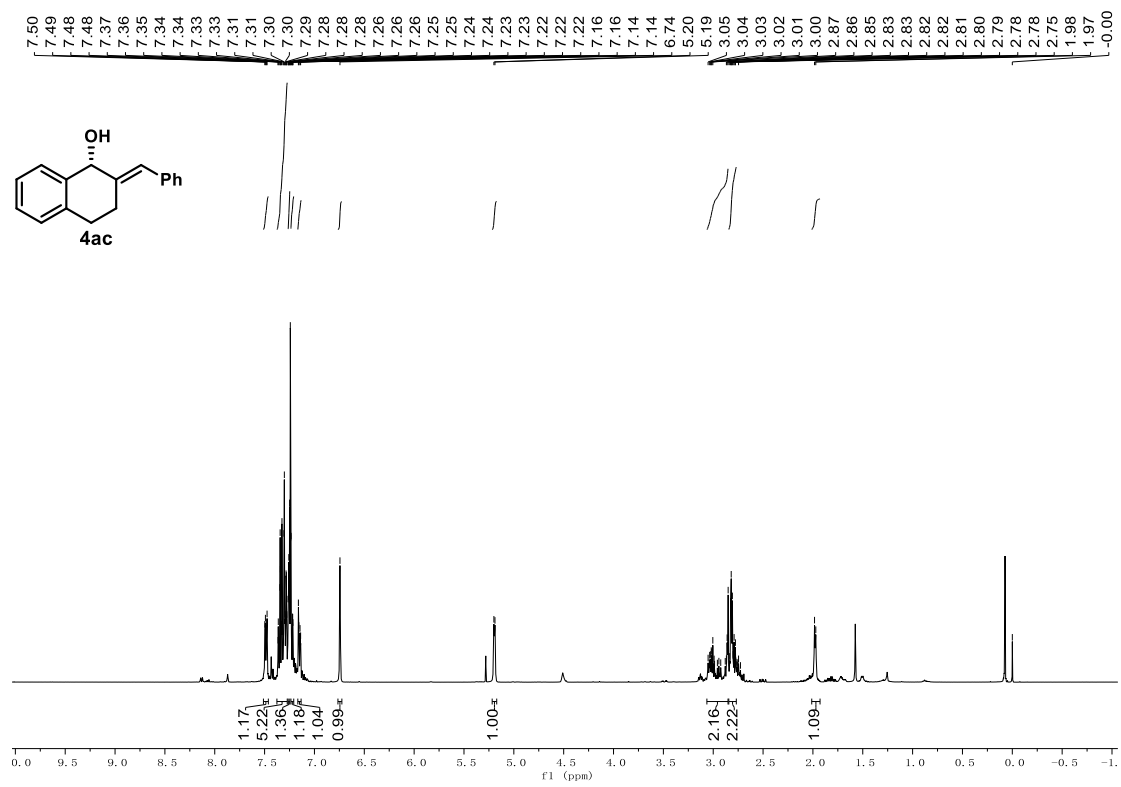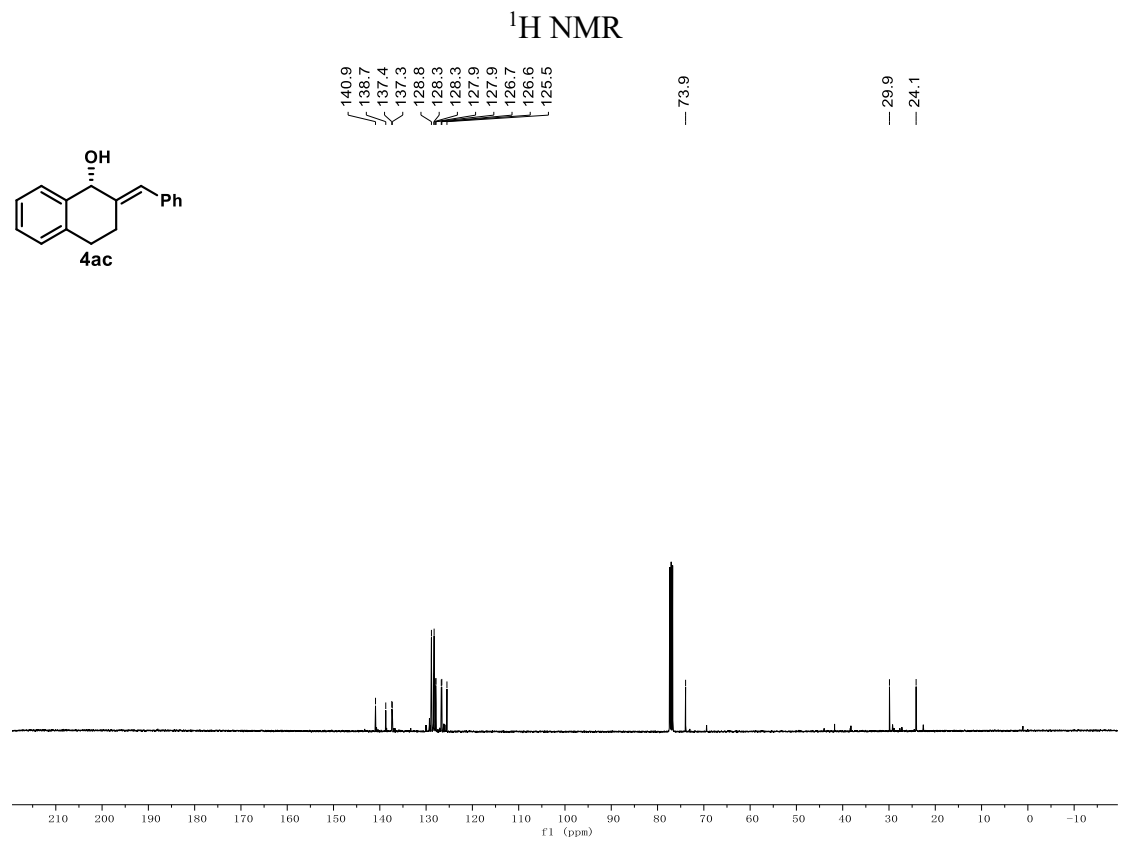

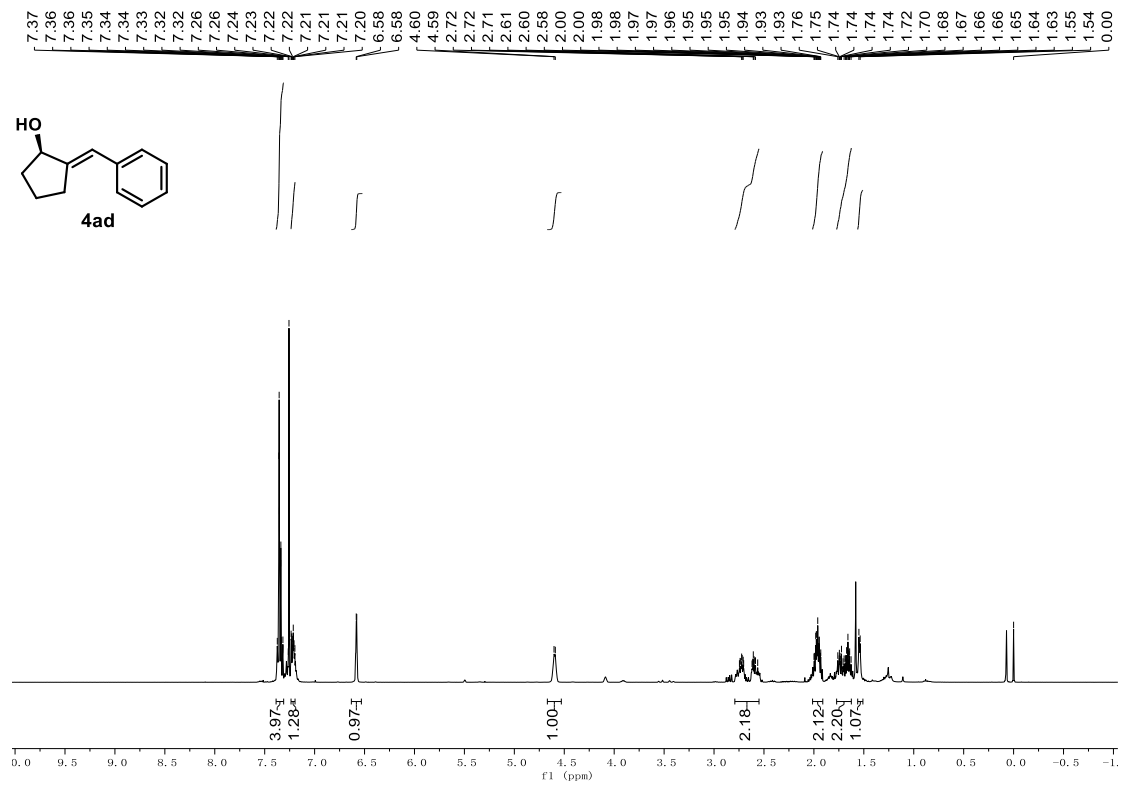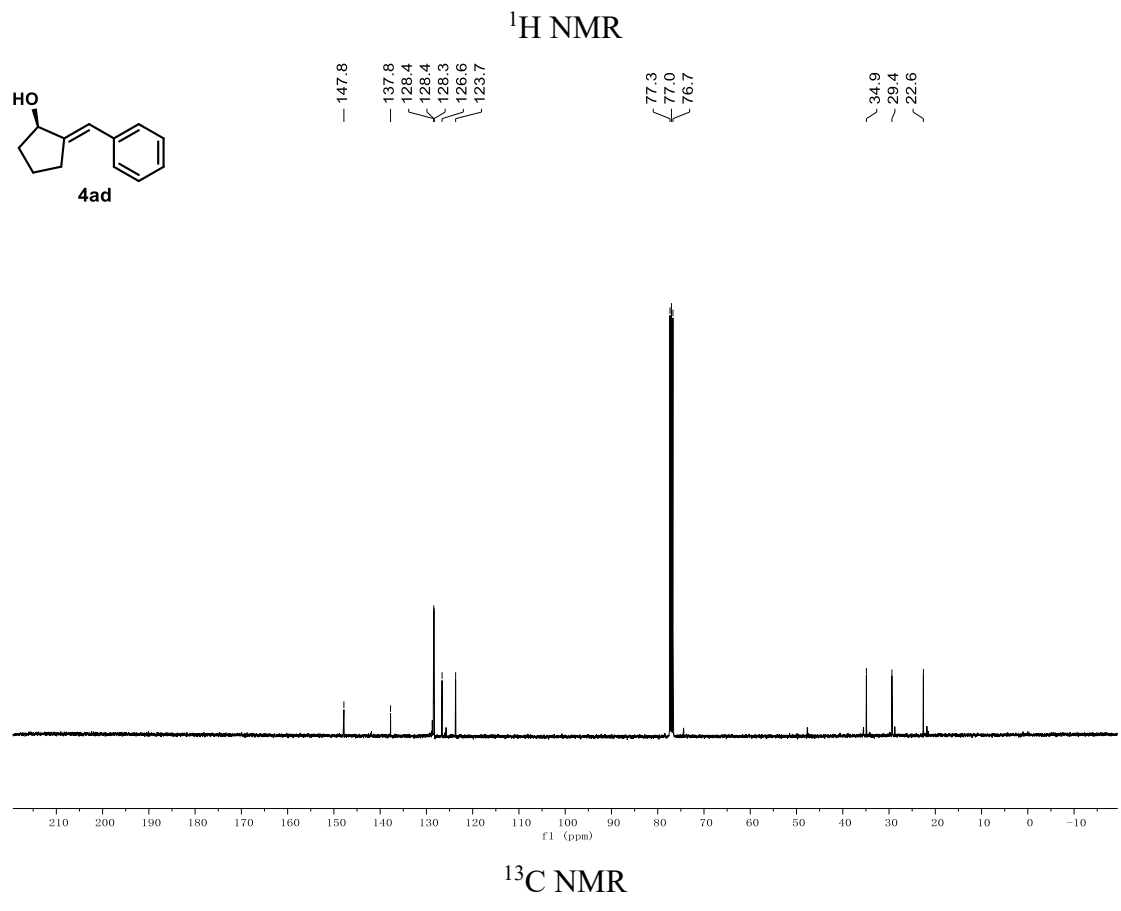

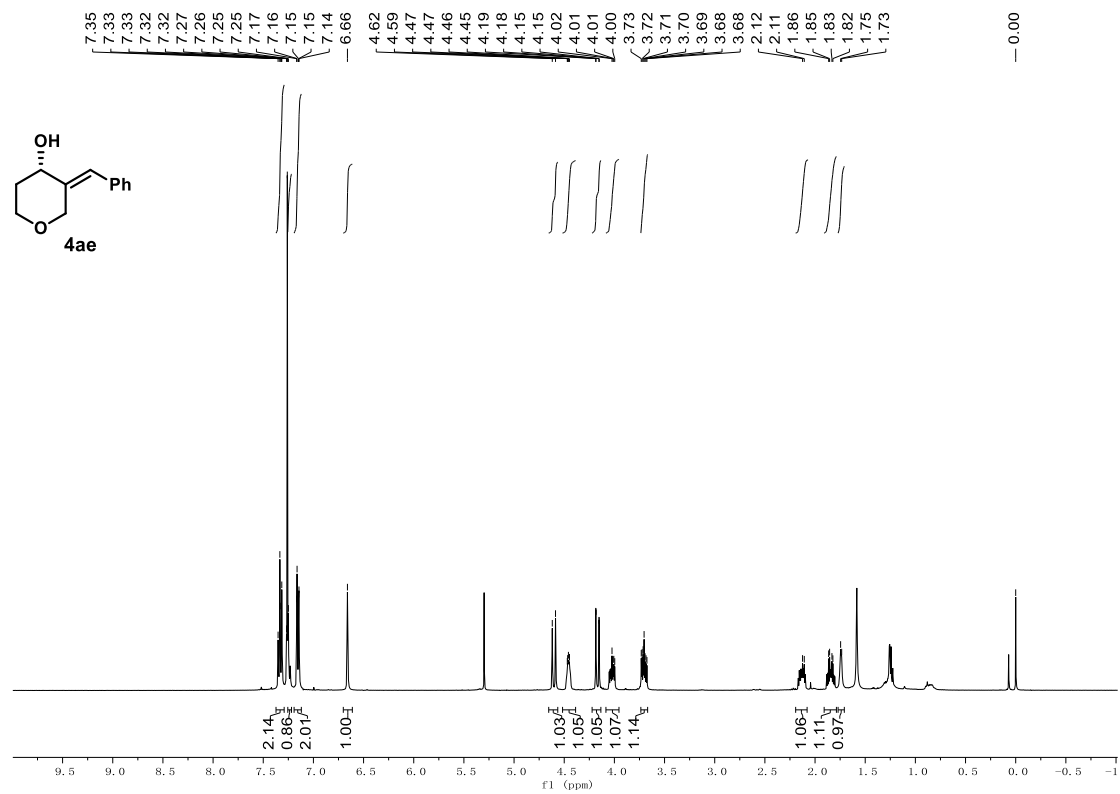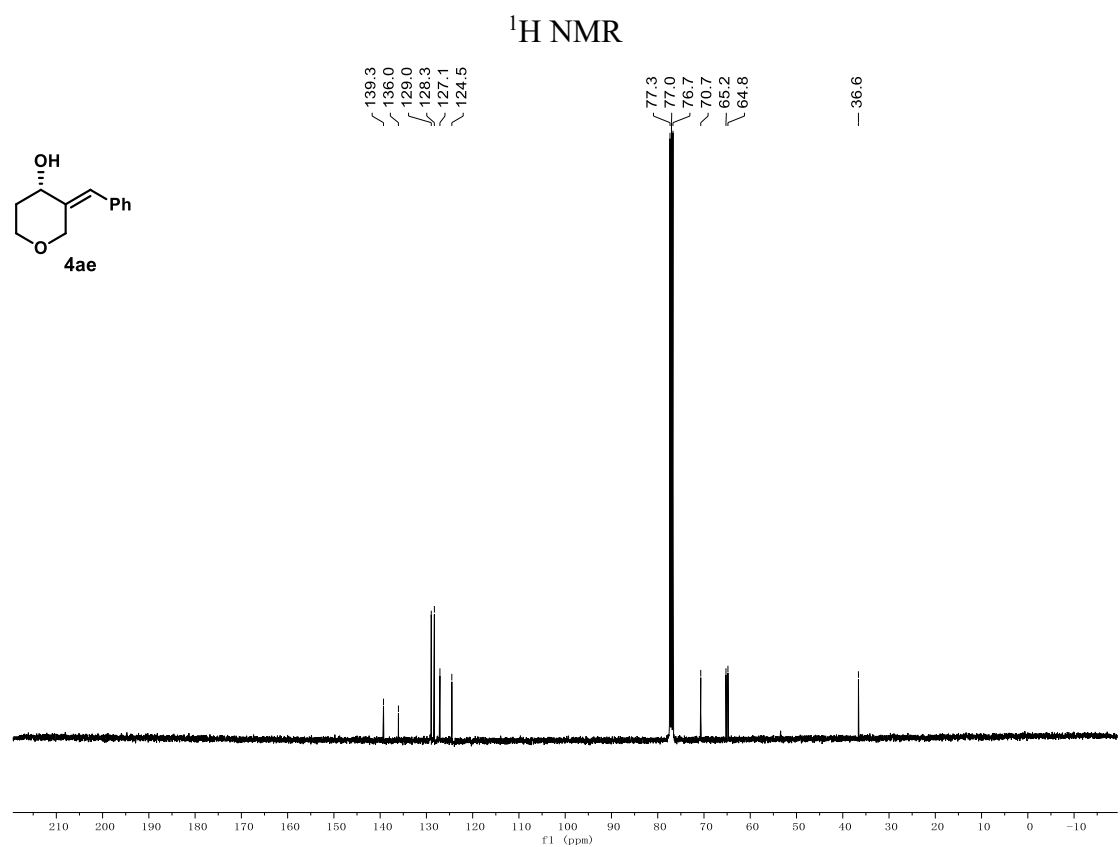

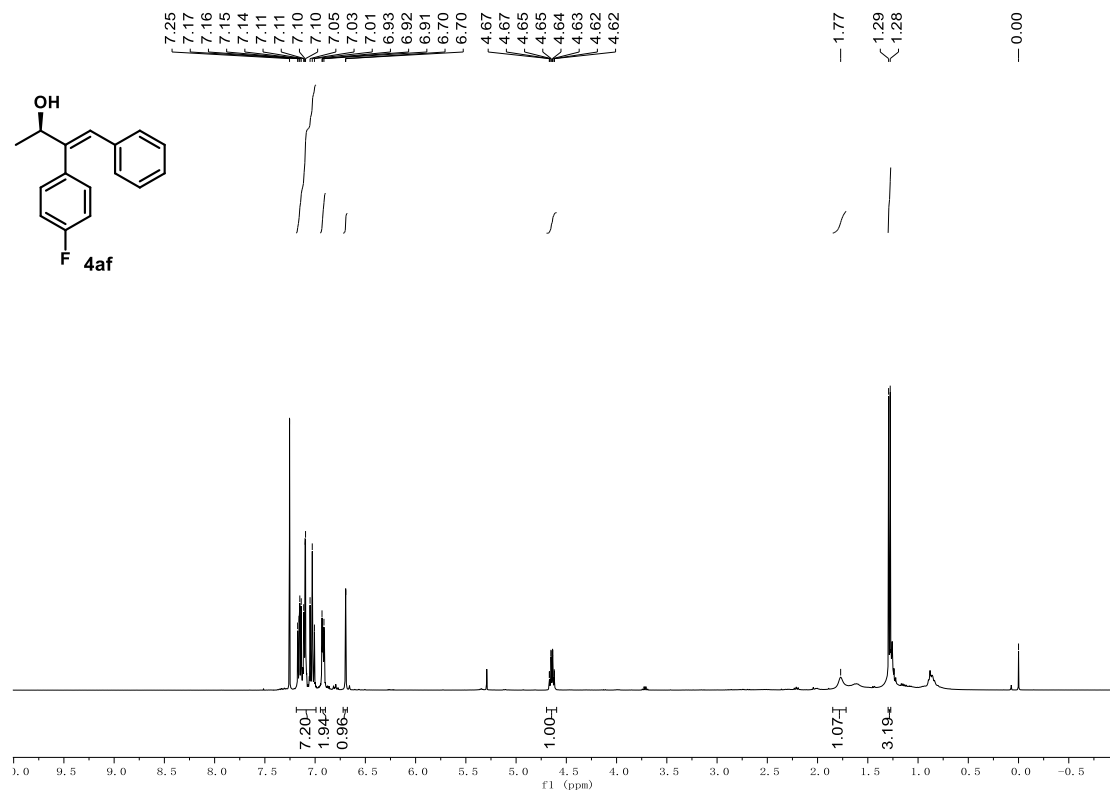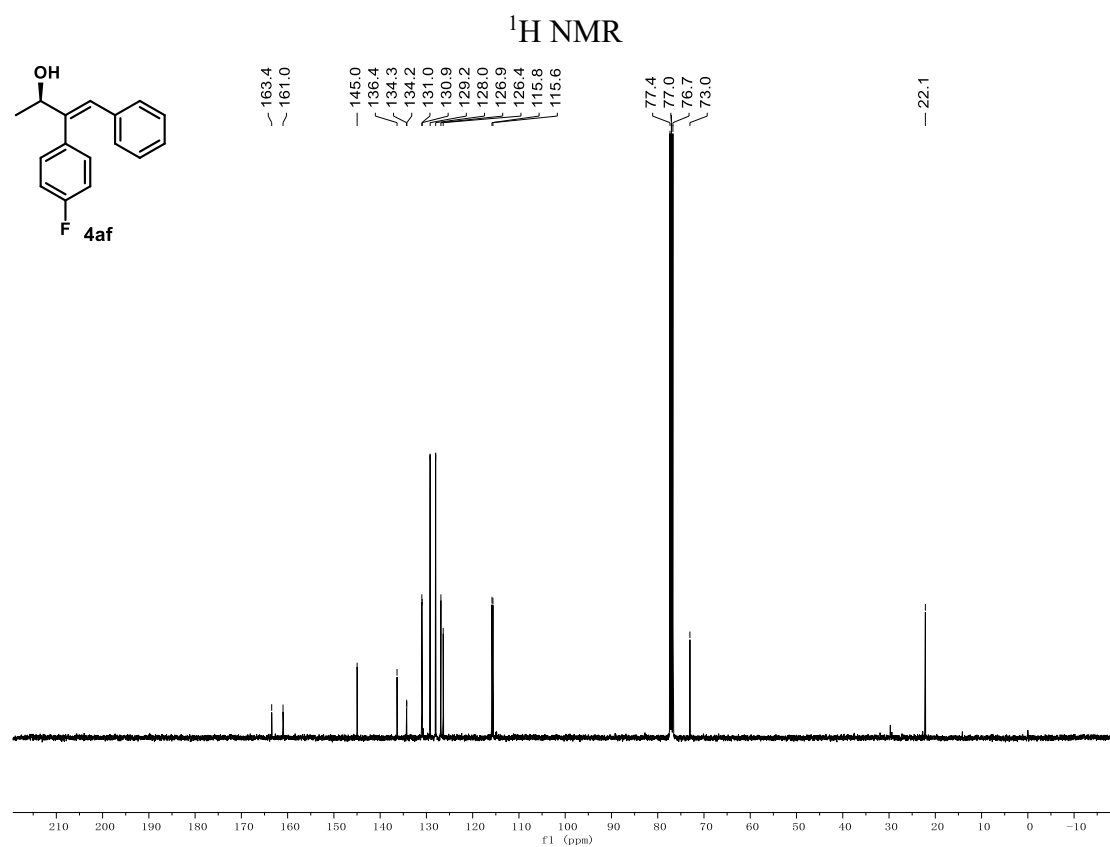

**<sup>13</sup>C NMR**

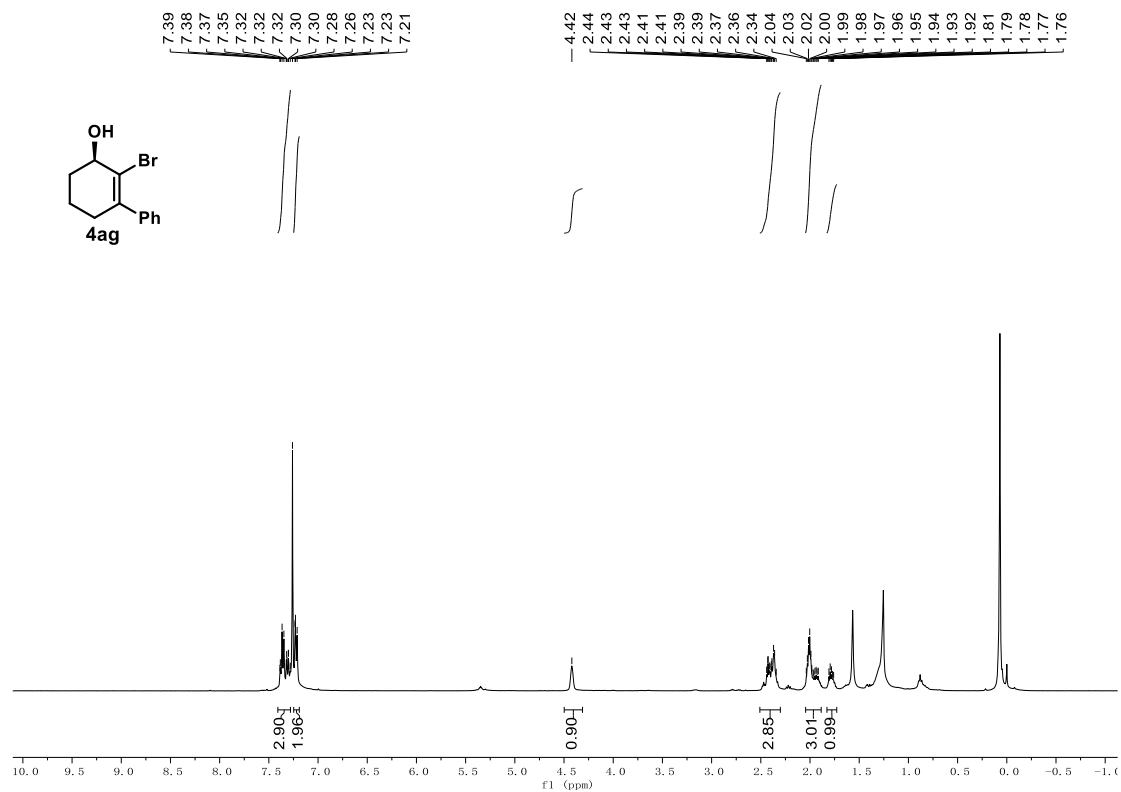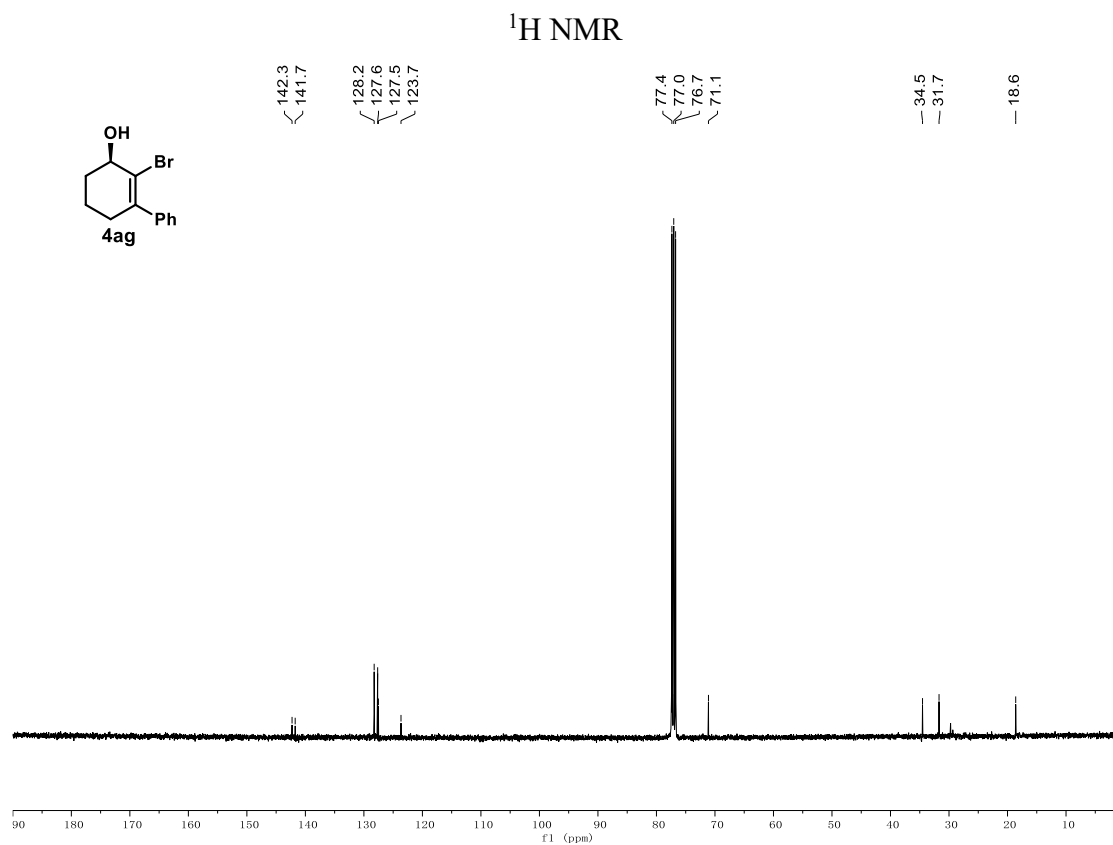

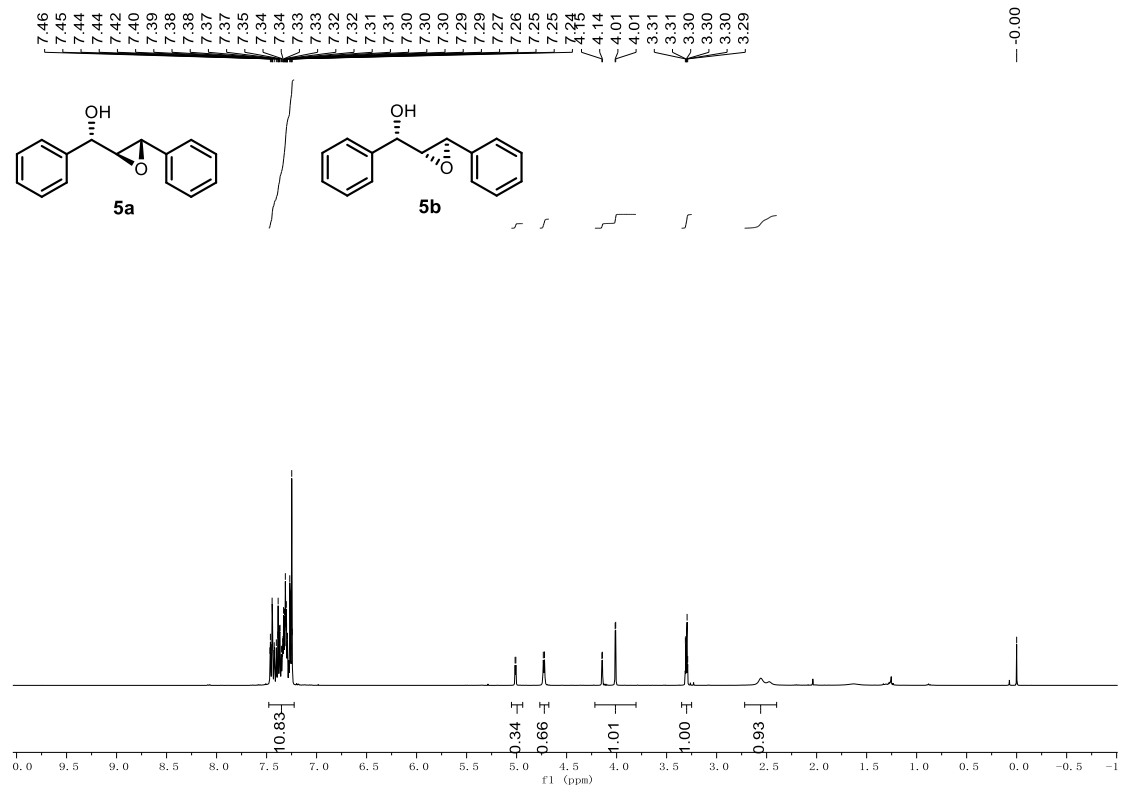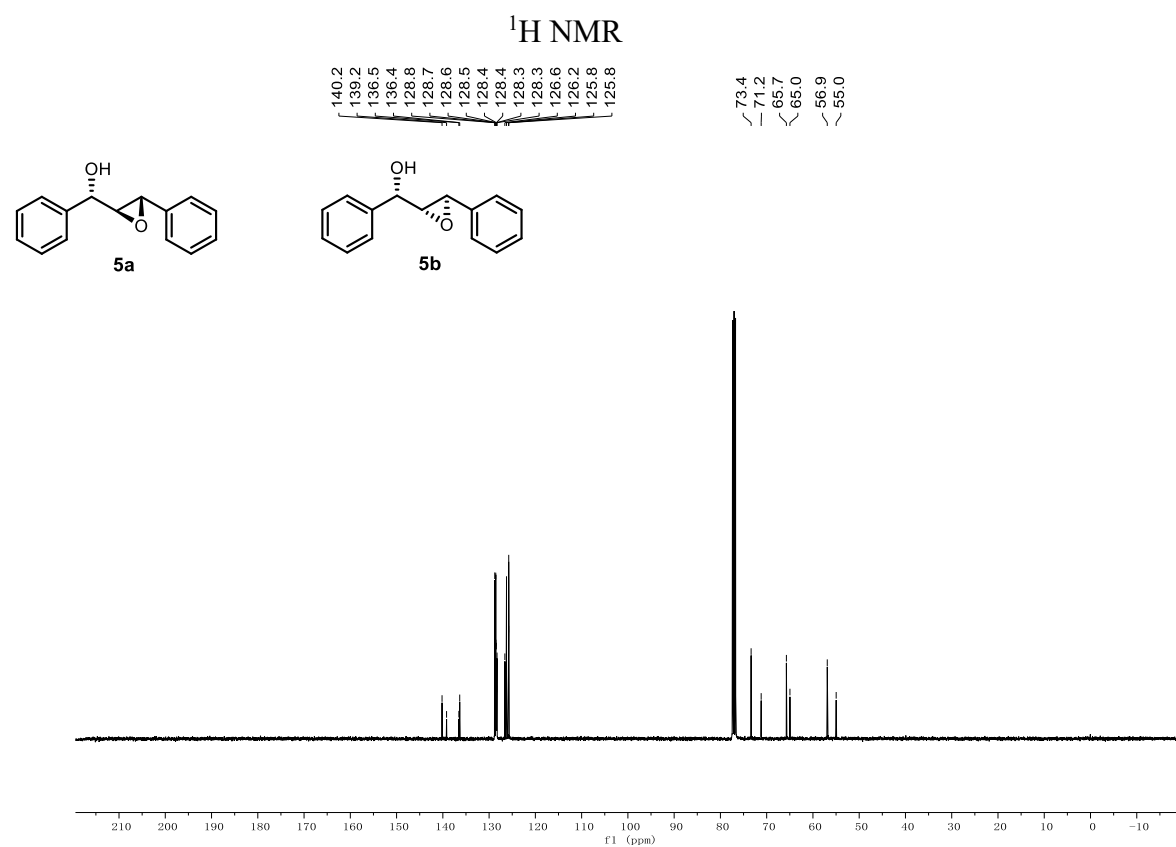



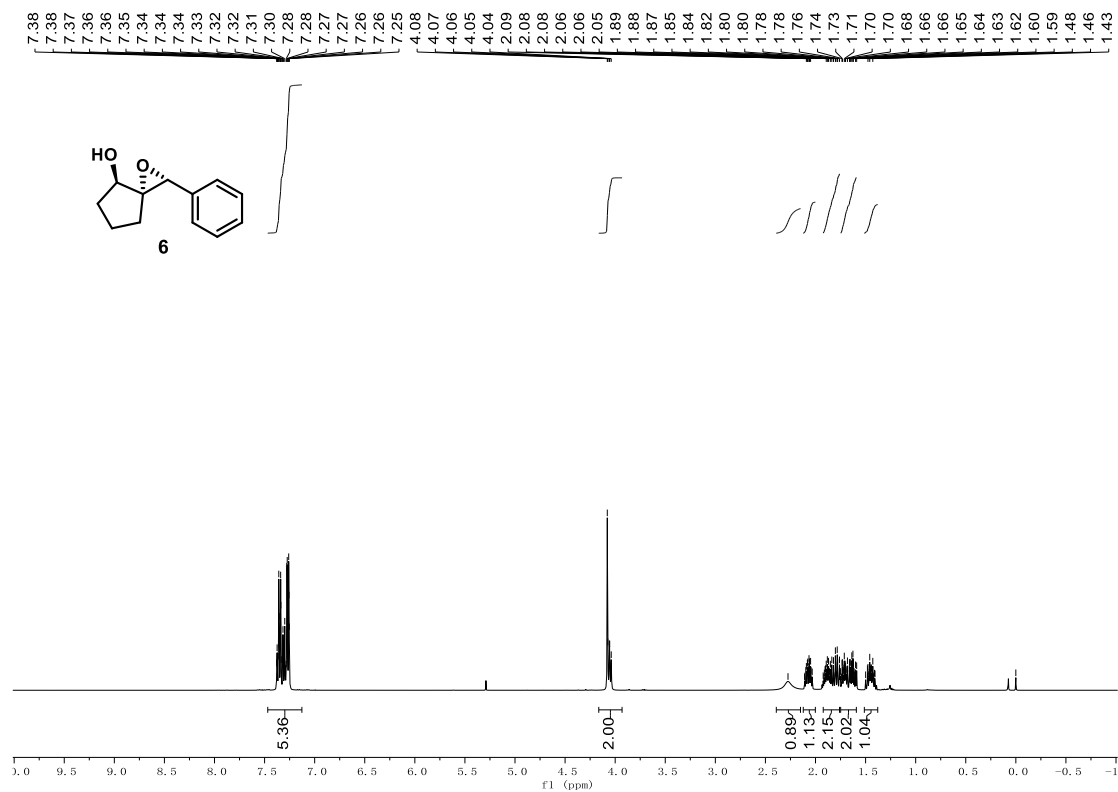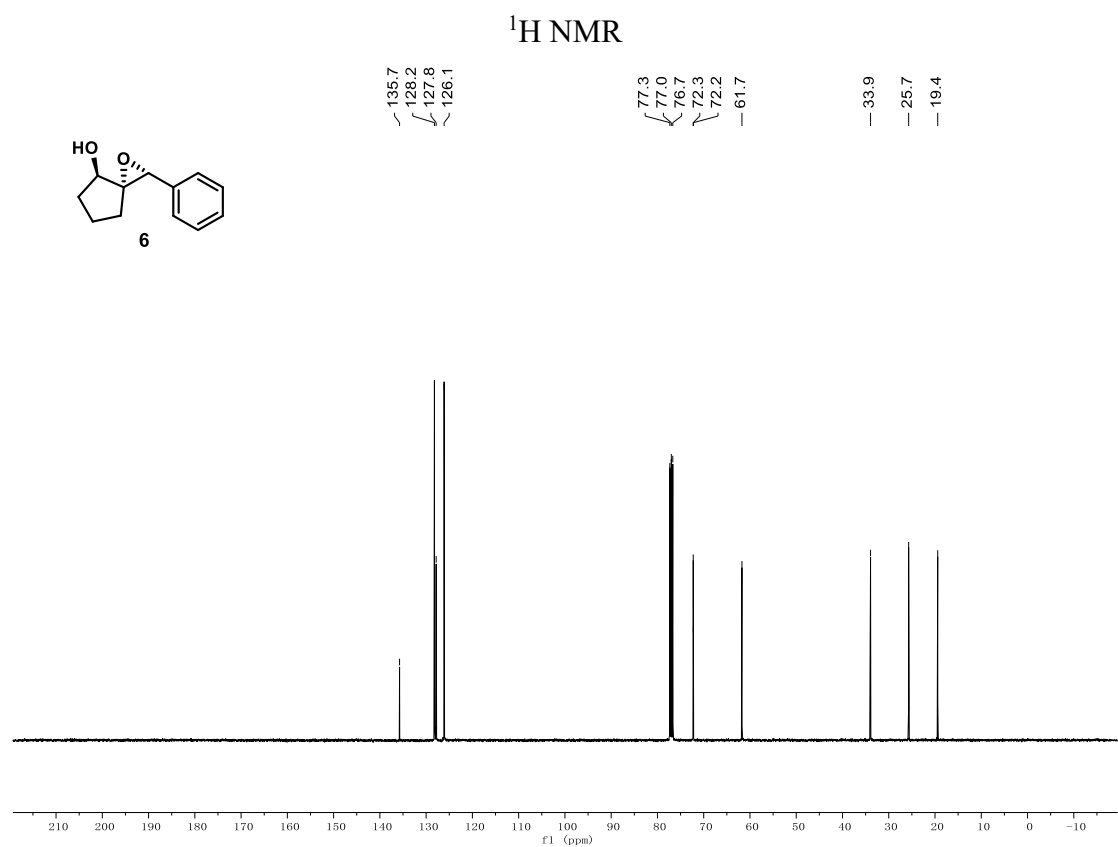

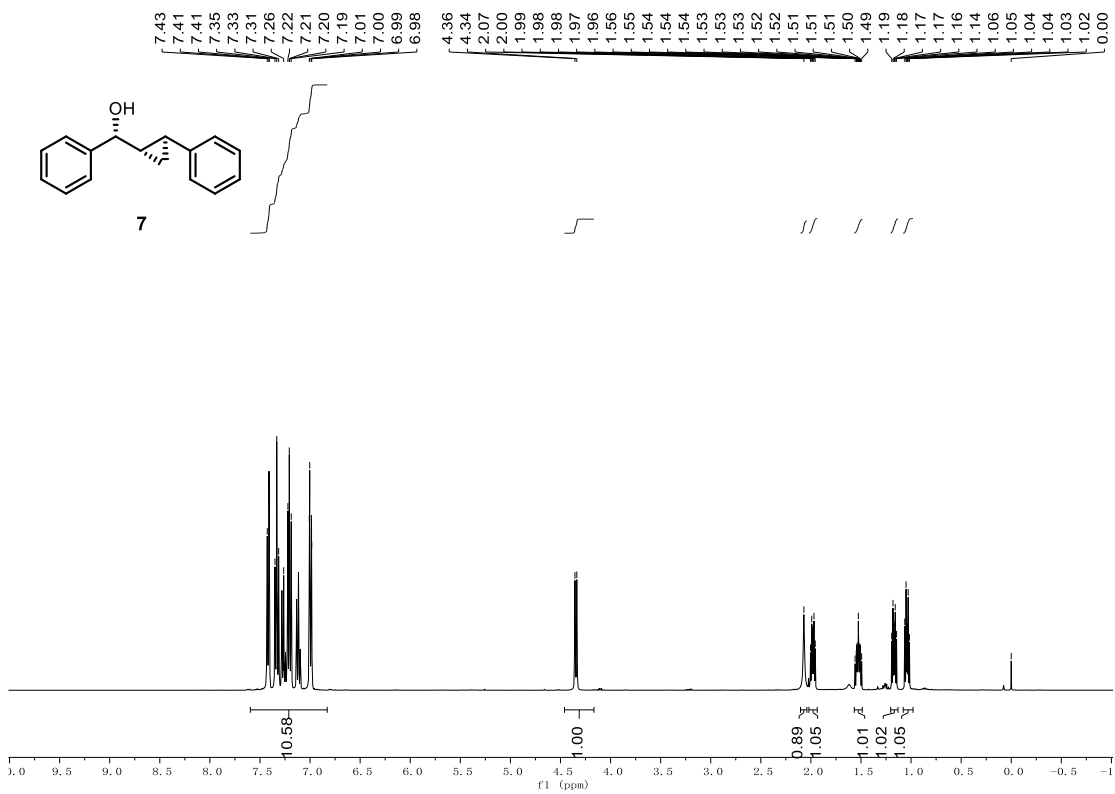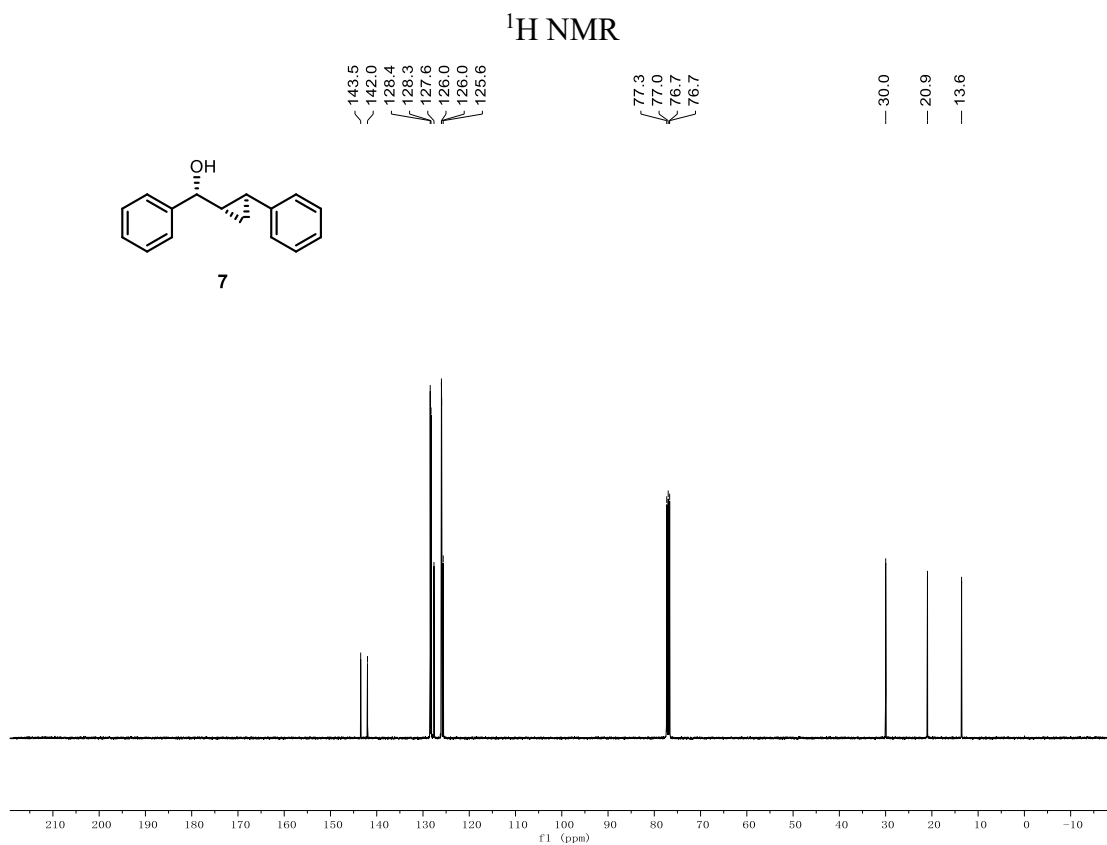

## VI. HPLC charts for hydrogenation products and derivatives

Data File D:\DATA\JI...NG\DATA\MJM-20211105PT\YXL-2021-11-2 2021-11-05 10-38-59\013-0501.D

Sample Name: MJM-187-rac

```
=====
Acq. Operator   :                               Seq. Line :    5
Acq. Instrument : Instrument 2                  Location  : Vial 13
Injection Date  : 11/5/2021 11:58:04 AM        Inj       :    1
                                           Inj Volume: 3.000 µl

Acq. Method     : D:\DATA\JIAOBING\DATA\MJM-20211105PT\YXL-2021-11-2 2021-11-05 10-38-59\DAD-
                  OD(1-2)-90-10-1.0ML-3UL-220NM-25MIN.M
Last changed    : 6/3/2021 9:05:08 AM
Analysis Method : D:\METHOD\ZXH\DAD-OD(1-6)-90-10-1.0ML-3UL-220NM-25MIN.M
Last changed    : 12/14/2021 7:23:16 PM
                  (modified after loading)
Additional Info : Peak(s) manually integrated
=====
```

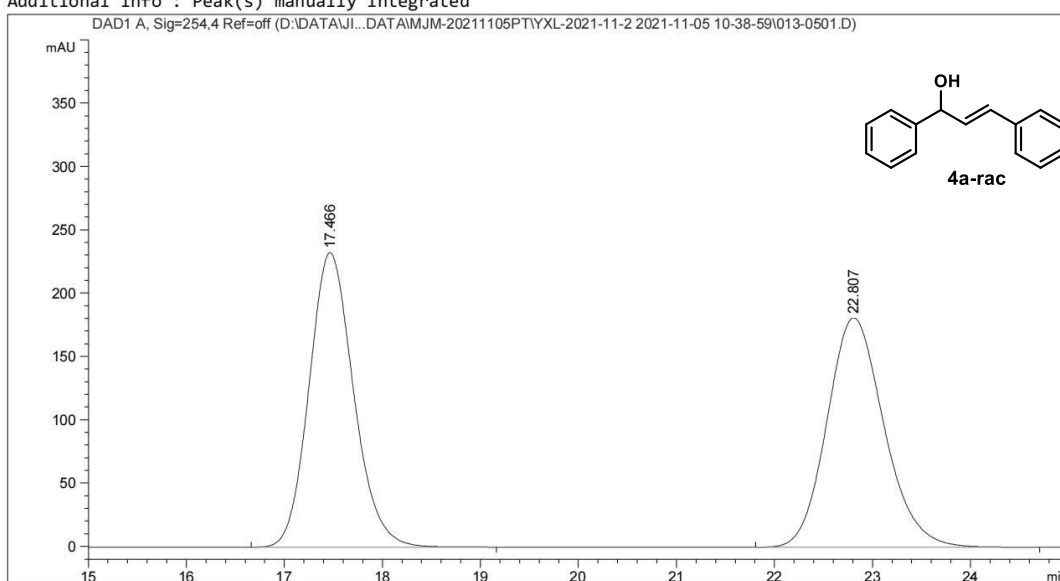

### Area Percent Report

```
Sorted By      : Signal
Multiplier     : 1.0000
Dilution      : 1.0000
Use Multiplier & Dilution Factor with ISTDs
```

Signal 1: DAD1 A, Sig=254,4 Ref=off

| Peak # | RetTime [min] | Type | Width [min] | Area [mAU*s] | Height [mAU] | Area %  |
|--------|---------------|------|-------------|--------------|--------------|---------|
| 1      | 17.466        | BB   | 0.4874      | 7318.80322   | 232.39673    | 49.9979 |
| 2      | 22.807        | BB   | 0.6234      | 7319.40918   | 181.14827    | 50.0021 |

Totals : 1.46382e4 413.54500

=====  
Acq. Operator : Seq. Line : 4  
Acq. Instrument : Instrument 2 Location : Vial 12  
Injection Date : 11/5/2021 11:32:07 AM Inj : 1  
Inj Volume : 3.000 µl  
Acq. Method : D:\DATA\JIAOBING\DATA\MJM-20211105PT\YXL-2021-11-2 2021-11-05 10-38-59\DAD-  
OD(1-2)-90-10-1.0ML-3UL-220NM-25MIN.M  
Last changed : 6/3/2021 9:05:08 AM  
Analysis Method : D:\METHOD\ZXH\DAD-OD(1-6)-90-10-1.0ML-3UL-220NM-25MIN.M  
Last changed : 12/14/2021 7:24:29 PM  
(modified after loading)  
Additional Info : Peak(s) manually integrated

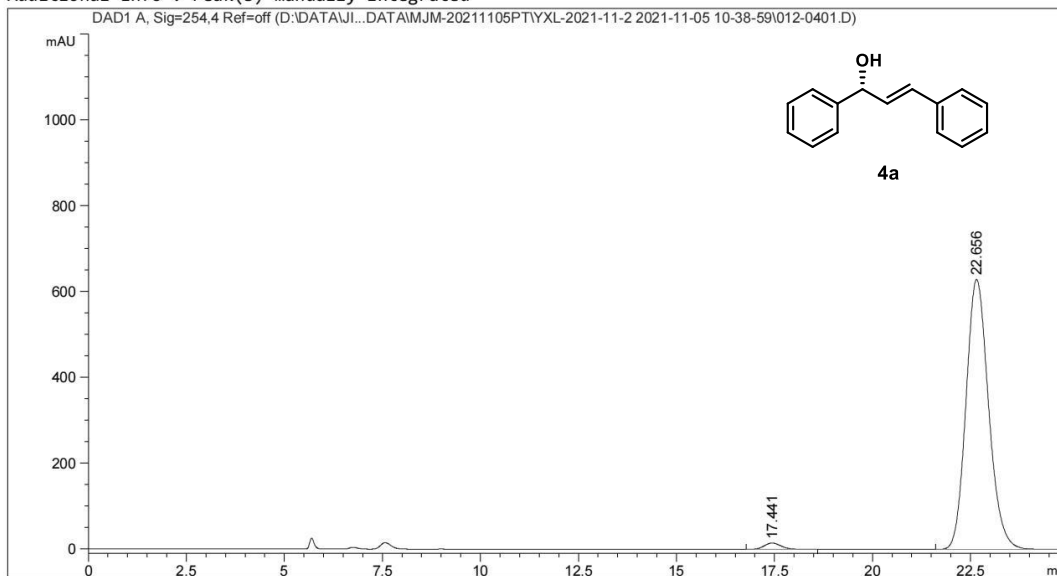

=====  
Area Percent Report  
=====

Sorted By : Signal  
Multiplier : 1.0000  
Dilution : 1.0000  
Use Multiplier & Dilution Factor with ISTDs

Signal 1: DAD1 A, Sig=254,4 Ref=off

| Peak # | RetTime [min] | Type | Width [min] | Area [mAU*s] | Height [mAU] | Area %  |
|--------|---------------|------|-------------|--------------|--------------|---------|
| 1      | 17.441        | BB   | 0.4487      | 444.73172    | 14.87916     | 1.7338  |
| 2      | 22.656        | BBA  | 0.6175      | 2.52065e4    | 629.05090    | 98.2662 |

Totals : 2.56512e4 643.93006

Data File D:\DATA\JIAOBING\DATA\MJM-2-40\ZJ-2021-12-04 2021-12-06 10-00-12\014-0601.D  
Sample Name: MJM-40-9-RAC

=====  
Acq. Operator : Seq. Line : 6  
Acq. Instrument : Instrument 2 Location : Vial 14  
Injection Date : 12/6/2021 12:26:46 PM Inj : 1  
Inj Volume : 3.000 µl  
Acq. Method : D:\DATA\JIAOBING\DATA\MJM-2-40\ZJ-2021-12-04 2021-12-06 10-00-12\DAD-OD(1-6  
) -90-10-1.0ML-3UL-220NM-40MIN.M  
Last changed : 12/4/2021 11:30:53 AM  
Analysis Method : D:\METHOD\ZXH\DAD-OD(1-6)-80-20-1.0ML-3UL-220NM-60MIN.M  
Last changed : 12/7/2021 9:20:19 AM  
(modified after loading)  
Additional Info : Peak(s) manually integrated

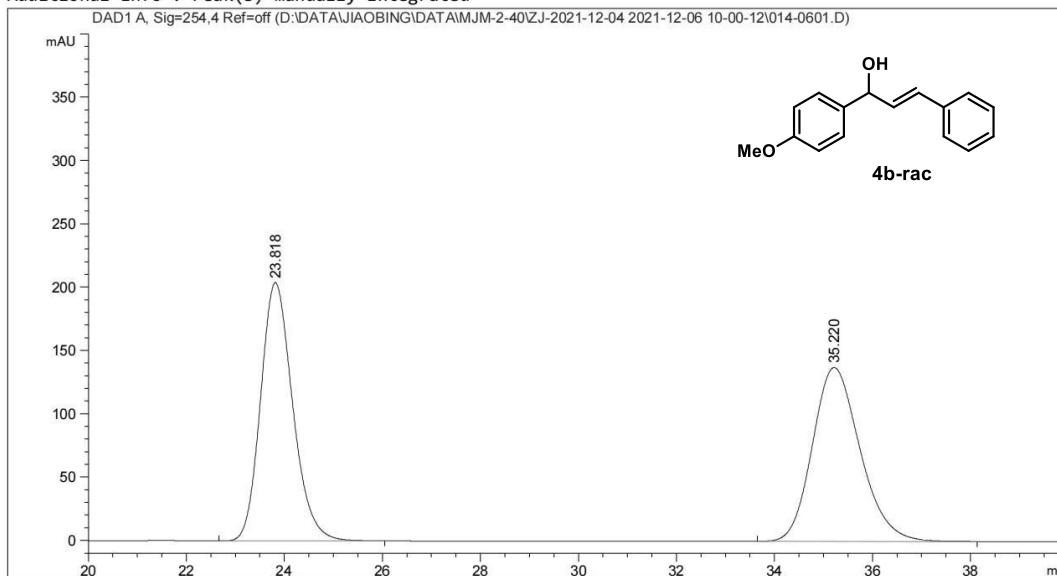

=====  
Area Percent Report  
=====

Sorted By : Signal  
Multiplier : 1.0000  
Dilution : 1.0000  
Use Multiplier & Dilution Factor with ISTDs

Signal 1: DAD1 A, Sig=254,4 Ref=off

| Peak # | RetTime [min] | Type | Width [min] | Area [mAU*s] | Height [mAU] | Area %  |
|--------|---------------|------|-------------|--------------|--------------|---------|
| 1      | 23.818        | BB   | 0.7033      | 9290.55859   | 204.00586    | 50.0536 |
| 2      | 35.220        | BB   | 1.0279      | 9270.64746   | 137.26563    | 49.9464 |

Totals : 1.85612e4 341.27148

Data File D:\DATA\JIAOBING\DATA\MJM-2-40\ZJ-2021-12-04 2021-12-06 10-00-12\013-0501.D  
Sample Name: MJM-40-9

=====  
Acq. Operator : Seq. Line : 5  
Acq. Instrument : Instrument 2 Location : Vial 13  
Injection Date : 12/6/2021 11:45:48 AM Inj : 1  
Inj Volume : 3.000 µl  
Acq. Method : D:\DATA\JIAOBING\DATA\MJM-2-40\ZJ-2021-12-04 2021-12-06 10-00-12\DAD-OD(1-6  
) -90-10-1.0ML-3UL-220NM-40MIN.M  
Last changed : 12/4/2021 11:30:53 AM  
Analysis Method : D:\METHOD\ZXH\DAD-OD(1-6)-90-10-1.0ML-3UL-220NM-90MIN.M  
Last changed : 12/6/2021 3:04:35 PM  
(modified after loading)  
Additional Info : Peak(s) manually integrated

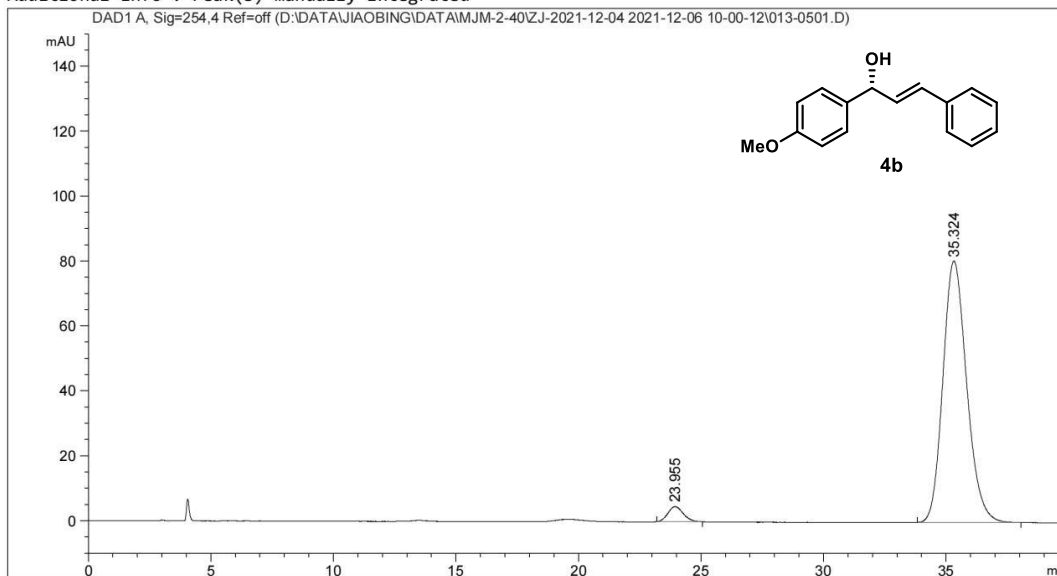

=====  
Area Percent Report  
=====

Sorted By : Signal  
Multiplier : 1.0000  
Dilution : 1.0000  
Use Multiplier & Dilution Factor with ISTDs

Signal 1: DAD1 A, Sig=254,4 Ref=off

| Peak # | RetTime [min] | Type | Width [min] | Area [mAU*s] | Height [mAU] | Area %  |
|--------|---------------|------|-------------|--------------|--------------|---------|
| 1      | 23.955        | BB   | 0.5226      | 203.23677    | 4.66176      | 3.6027  |
| 2      | 35.324        | BB   | 1.0292      | 5437.92676   | 80.58797     | 96.3973 |

Totals : 5641.16353 85.24972



=====  
Acq. Operator : Seq. Line : 3  
Acq. Instrument : Instrument 2 Location : Vial 31  
Injection Date : 7/7/2021 10:02:49 PM Inj : 1  
Inj Volume : 3.000 µl  
Acq. Method : D:\DATA\LG\YXL-240-17H\YXL-240-17H 2021-07-07 21-36-37\DAD-OD(1-2)-90-10-1.  
0ML-3UL-220NM-40MIN.M  
Last changed : 4/24/2021 11:29:01 AM  
Analysis Method : D:\METHOD\MYC\DAD-OJ(1-6)-80-20-0.3ML-5UL-ALL-90MIN.M  
Last changed : 7/8/2021 9:33:42 AM  
(modified after loading)  
Additional Info : Peak(s) manually integrated

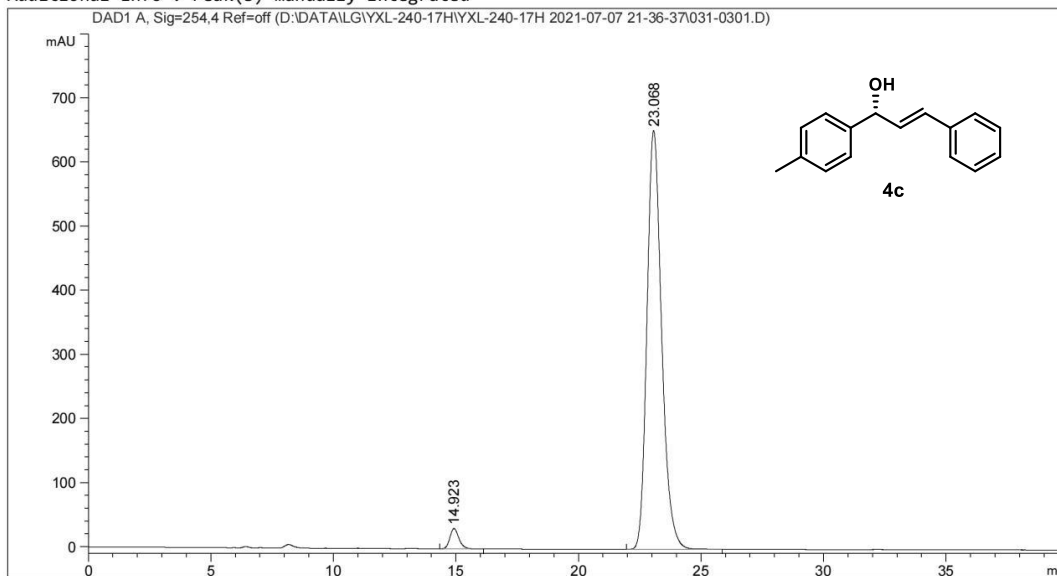

=====  
Area Percent Report  
=====

Sorted By : Signal  
Multiplier : 1.0000  
Dilution : 1.0000  
Use Multiplier & Dilution Factor with ISTDs

Signal 1: DAD1 A, Sig=254,4 Ref=off

| Peak # | RetTime [min] | Type | Width [min] | Area [mAU*s] | Height [mAU] | Area %  |
|--------|---------------|------|-------------|--------------|--------------|---------|
| 1      | 14.923        | BB   | 0.3934      | 815.95038    | 31.79375     | 2.9188  |
| 2      | 23.068        | BB   | 0.6367      | 2.71386e4    | 653.19257    | 97.0812 |

Totals : 2.79546e4 684.98632



Data File D:\DATA\MYC\MYC-92-RAC\MYC-92-6-RAC 2021-07-01 10-21-10\050-2601.D  
 Sample Name: MJM-10-RAC

```

=====
Acq. Operator   :                               Seq. Line :   26
Acq. Instrument : Instrument 2                   Location  : Vial 50
Injection Date  : 7/2/2021 1:51:06 AM          Inj       :    1
                                           Inj Volume: 3.000 µl

Acq. Method    : D:\DATA\MYC\MYC-92-RAC\MYC-92-6-RAC 2021-07-01 10-21-10\DAD-OD(1-2)-90-10-1
                  .0ML-3UL-220NM-40MIN.M
Last changed   : 4/24/2021 11:29:01 AM
Analysis Method: D:\METHOD\ZXH\DAD-OD(1-2)-92-8-0.5ML-3UL-220NM-40MIN.M
Last changed   : 7/2/2021 11:12:06 AM
                  (modified after loading)
Additional Info : Peak(s) manually integrated
  
```

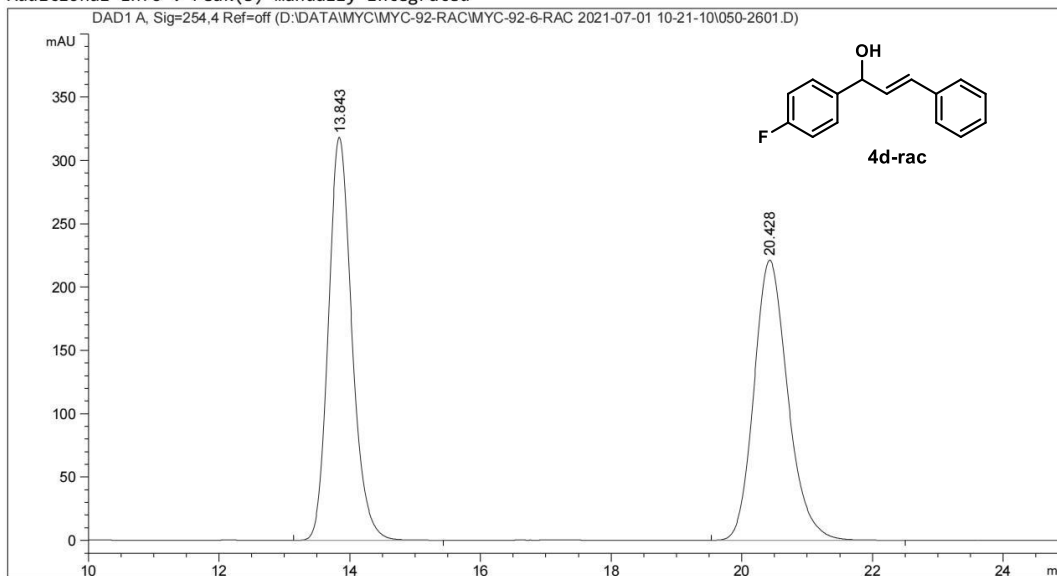

Area Percent Report

```

Sorted By      :      Signal
Multiplier     :      1.0000
Dilution      :      1.0000
Use Multiplier & Dilution Factor with ISTDs
  
```

Signal 1: DAD1 A, Sig=254,4 Ref=off

| Peak # | RetTime [min] | Type | Width [min] | Area [mAU*s] | Height [mAU] | Area %  |
|--------|---------------|------|-------------|--------------|--------------|---------|
| 1      | 13.843        | BB   | 0.3835      | 7947.25977   | 318.11285    | 50.0256 |
| 2      | 20.428        | BB   | 0.5509      | 7939.12354   | 221.08963    | 49.9744 |

Totals :                    1.58864e4   539.20248

=====  
Acq. Operator : Seq. Line : 25  
Acq. Instrument : Instrument 2 Location : Vial 49  
Injection Date : 7/2/2021 1:10:06 AM Inj : 1  
Inj Volume : 3.000 µl  
Acq. Method : D:\DATA\MYC\MYC-92-RAC\MYC-92-6-RAC 2021-07-01 10-21-10\DAD-OD(1-2)-90-10-1  
.0ML-3UL-220NM-40MIN.M  
Last changed : 4/24/2021 11:29:01 AM  
Analysis Method : D:\METHOD\ZXH\DAD-OD(1-2)-92-8-0.5ML-3UL-220NM-40MIN.M  
Last changed : 7/2/2021 2:45:36 PM  
(modified after loading)  
Additional Info : Peak(s) manually integrated

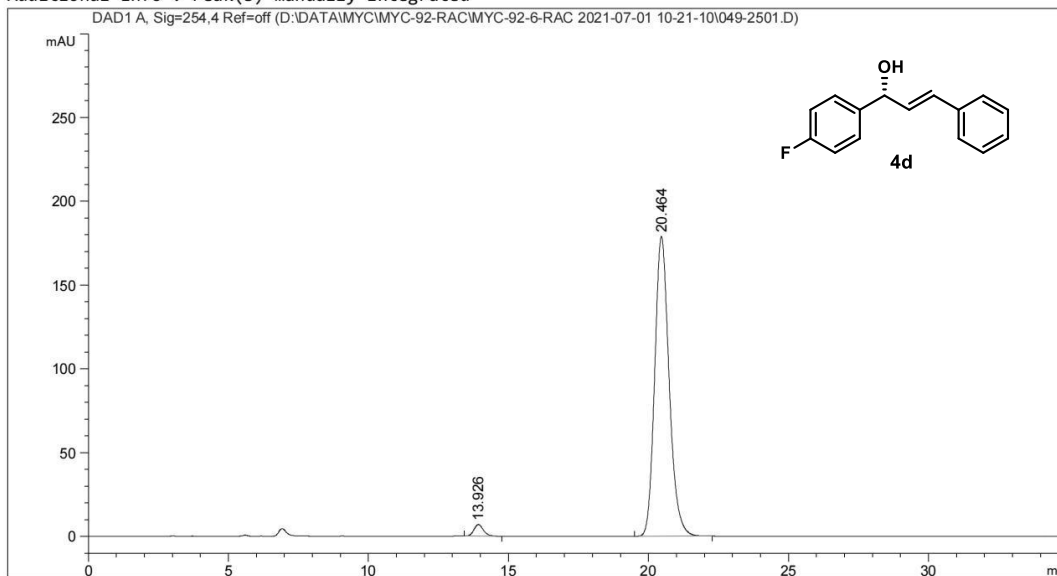

=====  
Area Percent Report  
=====

Sorted By : Signal  
Multiplier : 1.0000  
Dilution : 1.0000  
Use Multiplier & Dilution Factor with ISTDs

Signal 1: DAD1 A, Sig=254,4 Ref=off

| Peak # | RetTime [min] | Type | Width [min] | Area [mAU*s] | Height [mAU] | Area %  |
|--------|---------------|------|-------------|--------------|--------------|---------|
| 1      | 13.926        | BB   | 0.3564      | 163.30948    | 6.94467      | 2.4847  |
| 2      | 20.464        | BB   | 0.5479      | 6409.35986   | 178.91289    | 97.5153 |

Totals : 6572.66934 185.85756

```

=====
Acq. Operator   :                               Seq. Line :    5
Acq. Instrument : Instrument 2                   Location  : Vial 84
Injection Date  : 12/7/2021 11:12:31 AM        Inj       :    1
                                           Inj Volume: 3.000 µl

Acq. Method    : D:\DATA\JIAOBING\DATA\MJM-2-40\ZJ-2021-12-04 2021-12-07 08-56-53\DAD-OD(1-6
                )-90-10-1.0ML-3UL-220NM-40MIN.M
Last changed   : 12/4/2021 11:30:53 AM
Analysis Method: D:\METHOD\MYC\DAD-AD(1-2)-80-20-1.0ML-5UL-ALL-10MIN.M
Last changed   : 12/8/2021 9:27:11 AM
                (modified after loading)
Additional Info : Peak(s) manually integrated
  
```

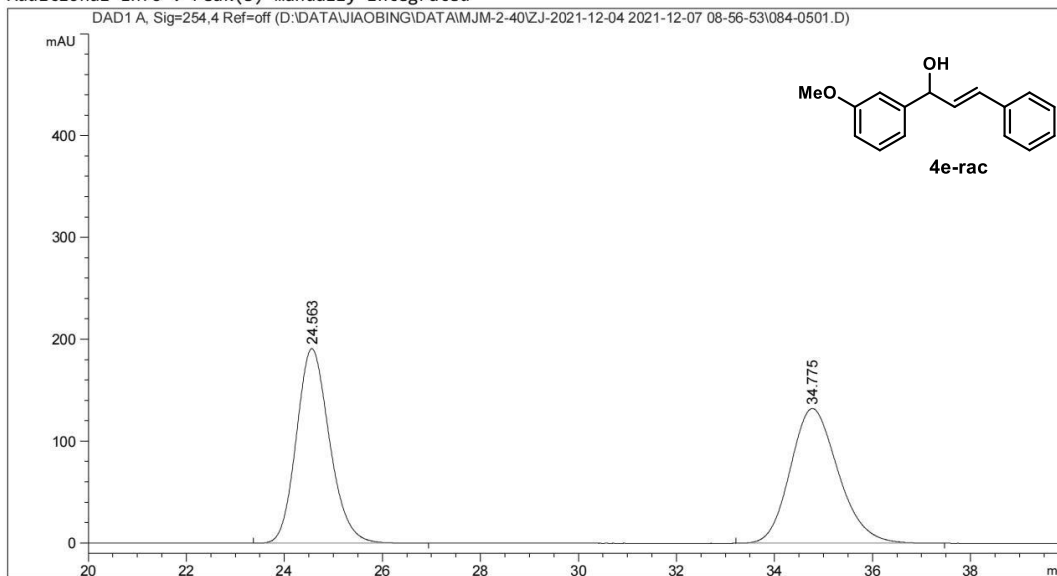

Area Percent Report

```

Sorted By      :      Signal
Multiplier     :      1.0000
Dilution       :      1.0000
Use Multiplier & Dilution Factor with ISTDs
  
```

Signal 1: DAD1 A, Sig=254,4 Ref=off

| Peak # | RetTime [min] | Type | Width [min] | Area [mAU*s] | Height [mAU] | Area %  |
|--------|---------------|------|-------------|--------------|--------------|---------|
| 1      | 24.563        | BB   | 0.7185      | 8983.49512   | 191.09201    | 50.0340 |
| 2      | 34.775        | BB   | 1.0449      | 8971.29883   | 132.33879    | 49.9660 |

Totals :                    1.79548e4   323.43080

=====  
Acq. Operator : Seq. Line : 8  
Acq. Instrument : Instrument 2 Location : Vial 14  
Injection Date : 12/30/2021 10:42:17 PM Inj : 1  
Inj Volume : 3.000 µl  
Acq. Method : D:\DATA\JIAOBING\DATA\MJM-2-62\MYC-304 2021-12-30 20-12-48\DAD-OD(1-6)-90-  
10-1.0ML-3UL-220NM-40MIN.M  
Last changed : 12/4/2021 11:30:53 AM  
Analysis Method : D:\METHOD\MYC\DAD-OJ(1-6)-90-10-1.0ML-5UL-ALL-70MIN.M  
Last changed : 1/14/2022 5:06:13 PM  
(modified after loading)  
Additional Info : Peak(s) manually integrated

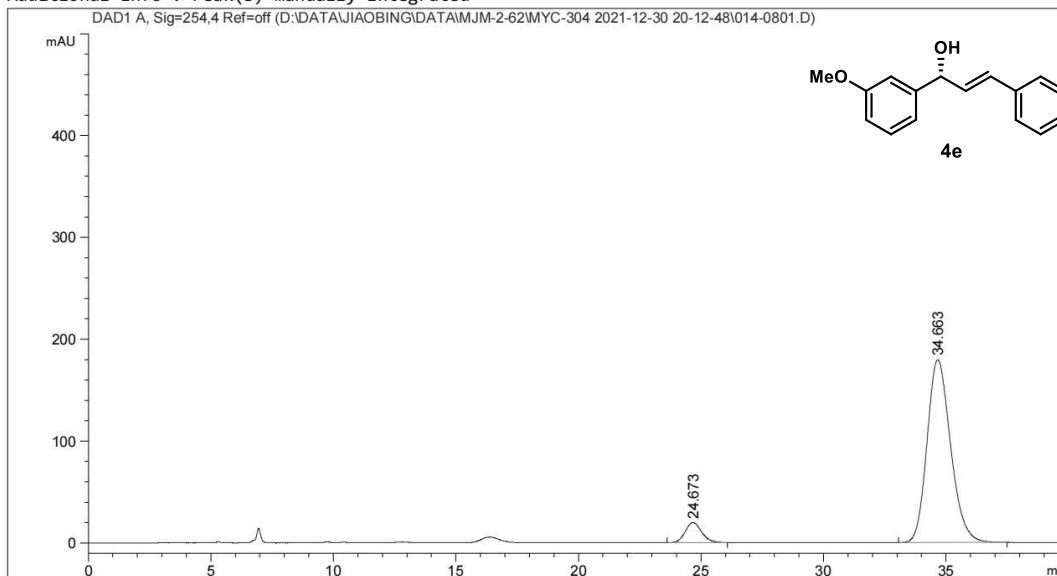

=====  
Area Percent Report  
=====

Sorted By : Signal  
Multiplier : 1.0000  
Dilution : 1.0000  
Use Multiplier & Dilution Factor with ISTDs

Signal 1: DAD1 A, Sig=254,4 Ref=off

| Peak # | RetTime [min] | Type | Width [min] | Area [mAU*s] | Height [mAU] | Area %  |
|--------|---------------|------|-------------|--------------|--------------|---------|
| 1      | 24.673        | BB   | 0.6922      | 911.63104    | 19.68872     | 7.0701  |
| 2      | 34.663        | BB   | 1.0192      | 1.19825e4    | 179.41107    | 92.9299 |

Totals : 1.28941e4 199.09980

```

=====
Acq. Operator   :                               Seq. Line :   12
Acq. Instrument : Instrument 2                 Location  : Vial 36
Injection Date  : 7/1/2021 4:17:18 PM        Inj       :    1
                                           Inj Volume: 3.000 µl

Acq. Method     : D:\DATA\MYC\MYC-92-RAC\MYC-92-6-RAC 2021-07-01 10-21-10\DAD-OD(1-2)-90-10-1
                  .0ML-3UL-220NM-40MIN.M
Last changed    : 4/24/2021 11:29:01 AM
Analysis Method : D:\METHOD\ZXH\DAD-OD(1-2)-92-8-0.5ML-3UL-220NM-40MIN.M
Last changed    : 7/2/2021 10:57:19 AM
                  (modified after loading)
Additional Info : Peak(s) manually integrated
  
```

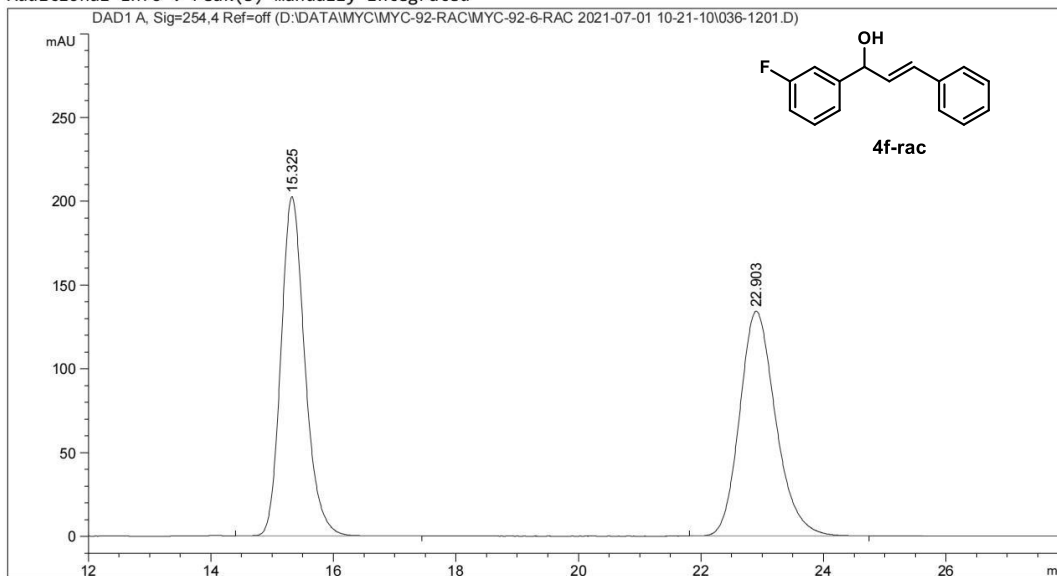

Area Percent Report

```

=====
Sorted By      :      Signal
Multiplier     :      1.0000
Dilution       :      1.0000
Use Multiplier & Dilution Factor with ISTDs
  
```

Signal 1: DAD1 A, Sig=254,4 Ref=off

| Peak # | RetTime [min] | Type | Width [min] | Area [mAU*s] | Height [mAU] | Area %  |
|--------|---------------|------|-------------|--------------|--------------|---------|
| 1      | 15.325        | BB   | 0.4138      | 5483.68115   | 202.61005    | 50.0038 |
| 2      | 22.903        | BB   | 0.6247      | 5482.84131   | 134.17958    | 49.9962 |

Totals :                                    1.09665e4    336.78963

Data File D:\DATA\MYC\MYC-92-RAC\MYC-92-6-RAC 2021-07-01 10-21-10\035-1101.D  
Sample Name: MJM-3

=====  
Acq. Operator : Seq. Line : 11  
Acq. Instrument : Instrument 2 Location : Vial 35  
Injection Date : 7/1/2021 3:36:20 PM Inj : 1  
Inj Volume : 3.000 µl  
Acq. Method : D:\DATA\MYC\MYC-92-RAC\MYC-92-6-RAC 2021-07-01 10-21-10\DAD-OD(1-2)-90-10-1  
.0ML-3UL-220NM-40MIN.M  
Last changed : 4/24/2021 11:29:01 AM  
Analysis Method : D:\METHOD\ZXH\DAD-OD(1-2)-92-8-0.5ML-3UL-220NM-40MIN.M  
Last changed : 7/2/2021 11:08:23 AM  
(modified after loading)  
Additional Info : Peak(s) manually integrated

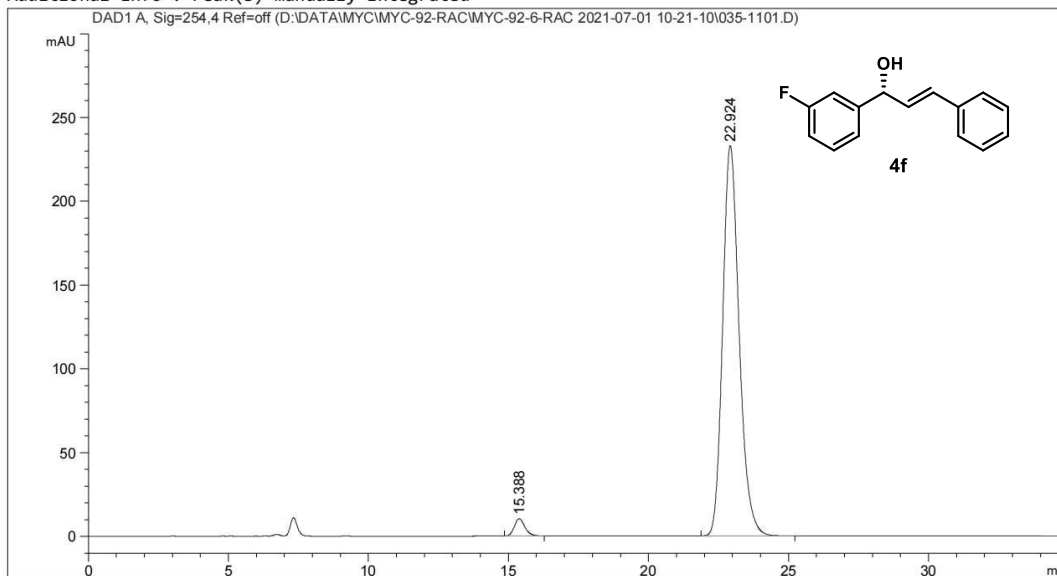

=====  
Area Percent Report  
=====

Sorted By : Signal  
Multiplier : 1.0000  
Dilution : 1.0000  
Use Multiplier & Dilution Factor with ISTDs

Signal 1: DAD1 A, Sig=254,4 Ref=off

| Peak # | RetTime [min] | Type | Width [min] | Area [mAU*s] | Height [mAU] | Area %  |
|--------|---------------|------|-------------|--------------|--------------|---------|
| 1      | 15.388        | BB   | 0.4005      | 272.78506    | 10.38456     | 2.7813  |
| 2      | 22.924        | BB   | 0.6296      | 9534.89160   | 232.93919    | 97.2187 |

Totals : 9807.67667 243.32375

=====  
Acq. Operator : Seq. Line : 10  
Acq. Instrument : Instrument 2 Location : Vial 34  
Injection Date : 7/1/2021 2:55:21 PM Inj : 1  
Inj Volume : 3.000 µl  
Acq. Method : D:\DATA\MYC\MYC-92-RAC\MYC-92-6-RAC 2021-07-01 10-21-10\DAD-OD(1-2)-90-10-1  
.0ML-3UL-220NM-40MIN.M  
Last changed : 4/24/2021 11:29:01 AM  
Analysis Method : D:\METHOD\ZXH\DAD-OD(1-2)-92-8-0.5ML-3UL-220NM-40MIN.M  
Last changed : 7/2/2021 10:49:58 AM  
(modified after loading)

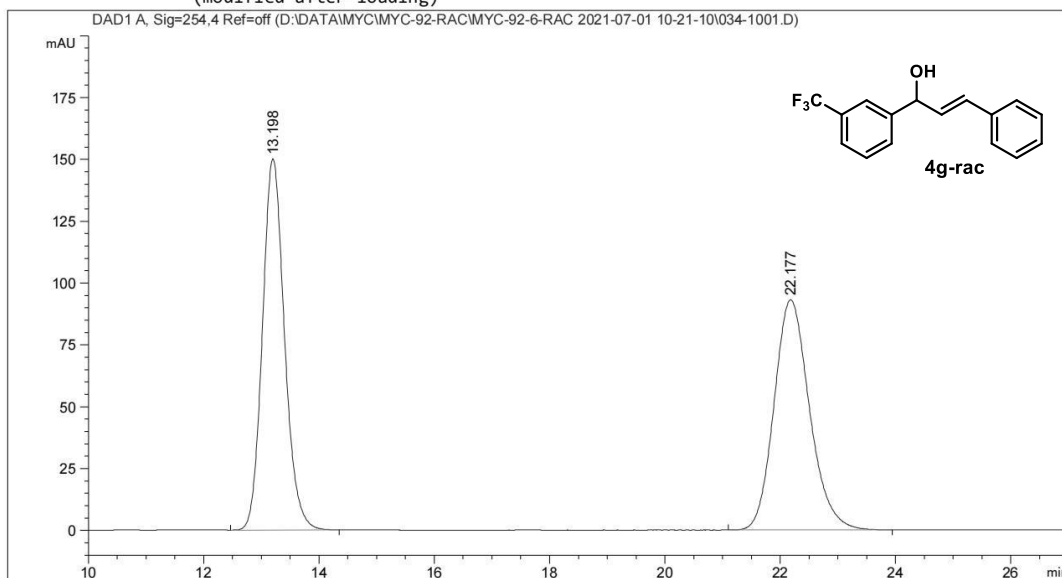

=====  
Area Percent Report  
=====

Sorted By : Signal  
Multiplier : 1.0000  
Dilution : 1.0000  
Use Multiplier & Dilution Factor with ISTDs

Signal 1: DAD1 A, Sig=254,4 Ref=off

| Peak # | RetTime [min] | Type | Width [min] | Area [mAU*s] | Height [mAU] | Area %  |
|--------|---------------|------|-------------|--------------|--------------|---------|
| 1      | 13.198        | BB   | 0.4071      | 3977.56860   | 150.13560    | 49.9705 |
| 2      | 22.177        | BB   | 0.6590      | 3982.26172   | 93.09669     | 50.0295 |

Totals : 7959.83032 243.23230

```
=====
Acq. Operator   :                               Seq. Line :    9
Acq. Instrument : Instrument 2                   Location  : Vial 33
Injection Date  : 7/1/2021 2:14:23 PM           Inj       :    1
                                                    Inj Volume: 3.000 µl

Acq. Method     : D:\DATA\MYC\MYC-92-RAC\MYC-92-6-RAC 2021-07-01 10-21-10\
                .0ML-3UL-220NM-40MIN.M          DAD-OD(1-2)-90-10-1
Last changed    : 4/24/2021 11:29:01 AM
Analysis Method : D:\METHOD\ZXH\DAD-OD(1-2)-92-8-0.5ML-3UL-220NM-40MIN.M
Last changed    : 7/2/2021 11:10:16 AM
                (modified after loading)
Additional Info : Peak(s) manually integrated
=====
```

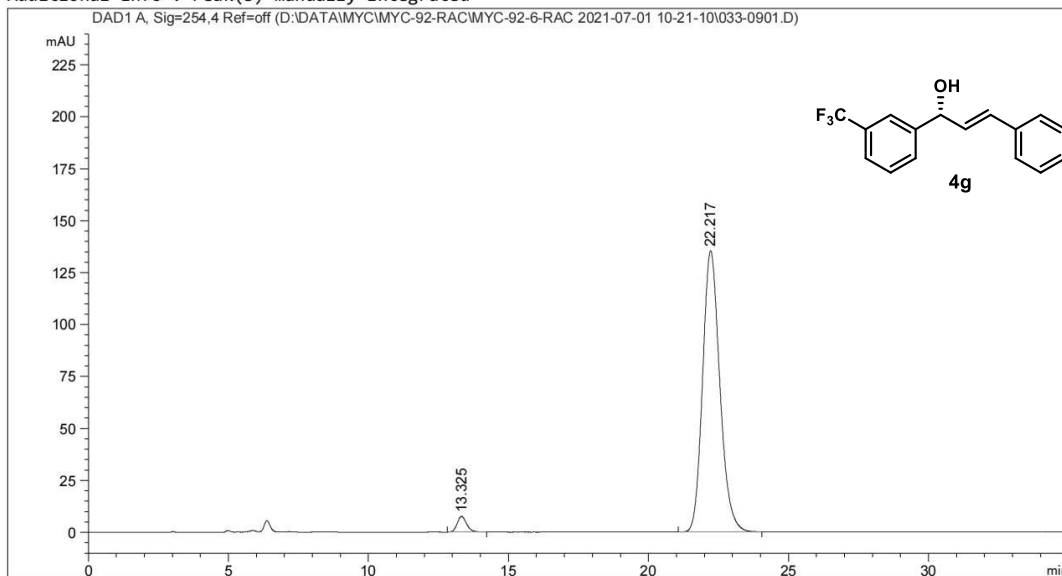

Area Percent Report

```
Sorted By      : Signal
Multiplier     : 1.0000
Dilution       : 1.0000
Use Multiplier & Dilution Factor with ISTDs
```

Signal 1: DAD1 A, Sig=254,4 Ref=off

| Peak # | RetTime [min] | Type | Width [min] | Area [mAU*s] | Height [mAU] | Area %  |
|--------|---------------|------|-------------|--------------|--------------|---------|
| 1      | 13.325        | BB   | 0.3576      | 178.65067    | 7.56233      | 2.9915  |
| 2      | 22.217        | BB   | 0.6615      | 5793.31299   | 135.30731    | 97.0085 |

Totals :                      5971.96365   142.86965



Data File D:\DATA\ZXH\MJM-20210702\MYC-92-6-RAC 2021-07-02 09-19-10\034-0601.D  
Sample Name: MJM-5-RAC

=====  
Acq. Operator : Seq. Line : 6  
Acq. Instrument : Instrument 2 Location : Vial 34  
Injection Date : 7/2/2021 11:49:49 AM Inj : 1  
Inj Volume : 3.000 µl  
Acq. Method : D:\DATA\ZXH\MJM-20210702\MYC-92-6-RAC 2021-07-02 09-19-10\DAD-OD(1-2)-92-8-  
0.5ML-3UL-220NM-40MIN.M  
Last changed : 7/2/2021 9:17:17 AM  
Analysis Method : D:\METHOD\ZXH\DAD-OD(1-2)-92-8-0.5ML-3UL-220NM-40MIN.M  
Last changed : 7/2/2021 3:11:04 PM  
(modified after loading)  
Additional Info : Peak(s) manually integrated

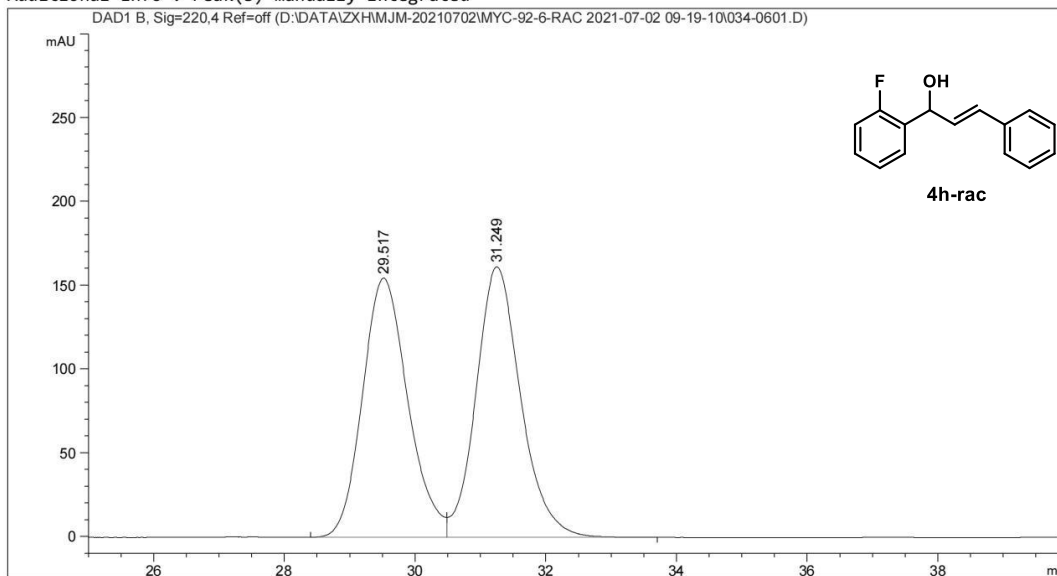

=====  
Area Percent Report  
=====

Sorted By : Signal  
Multiplier : 1.0000  
Dilution : 1.0000  
Use Multiplier & Dilution Factor with ISTDs

Signal 1: DAD1 B, Sig=220,4 Ref=off

| Peak # | RetTime [min] | Type | Width [min] | Area [mAU*s] | Height [mAU] | Area %  |
|--------|---------------|------|-------------|--------------|--------------|---------|
| 1      | 29.517        | BV   | 0.7400      | 7452.60254   | 154.71988    | 49.3092 |
| 2      | 31.249        | VB   | 0.7216      | 7661.42529   | 161.47006    | 50.6908 |

Totals : 1.51140e4 316.18994

=====  
Acq. Operator : Seq. Line : 5  
Acq. Instrument : Instrument 2 Location : Vial 33  
Injection Date : 7/2/2021 11:08:50 AM Inj : 1  
Inj Volume : 3.000 µl  
Acq. Method : D:\DATA\ZXH\MJM-20210702\MYC-92-6-RAC 2021-07-02 09-19-10\DAD-OD(1-2)-92-8-  
0.5ML-3UL-220NM-40MIN.M  
Last changed : 7/2/2021 9:17:17 AM  
Analysis Method : D:\METHOD\ZXH\DAD-OD(1-2)-92-8-0.5ML-3UL-220NM-40MIN.M  
Last changed : 7/2/2021 3:05:30 PM  
(modified after loading)  
Additional Info : Peak(s) manually integrated

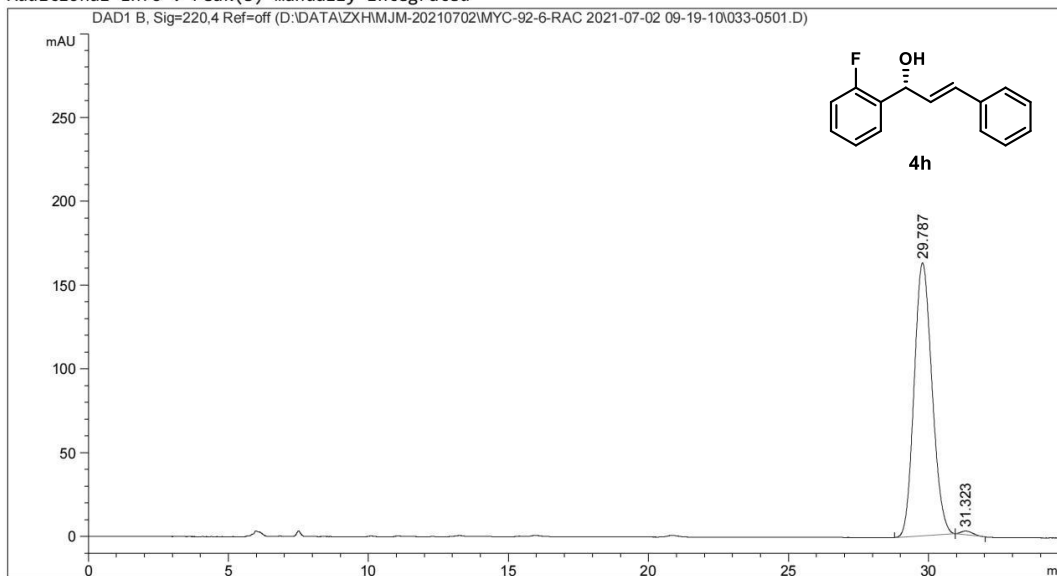

=====  
Area Percent Report  
=====

Sorted By : Signal  
Multiplier : 1.0000  
Dilution : 1.0000  
Use Multiplier & Dilution Factor with ISTDs

Signal 1: DAD1 B, Sig=220,4 Ref=off

| Peak # | RetTime [min] | Type | Width [min] | Area [mAU*s] | Height [mAU] | Area %  |
|--------|---------------|------|-------------|--------------|--------------|---------|
| 1      | 29.787        | BB   | 0.6891      | 7219.68457   | 162.87515    | 99.0907 |
| 2      | 31.323        | BB   | 0.3584      | 66.25014     | 2.23147      | 0.9093  |

Totals : 7285.93471 165.10663

Data File D:\DATA\ZXH\MJM-20210702\XX-1-122-RAC 2021-07-12 19-38-18\034-0401.D  
Sample Name: MJM-17-RAC-2

```
=====
Acq. Operator   :                               Seq. Line :    4
Acq. Instrument : Instrument 2                   Location  : Vial 34
Injection Date  : 7/12/2021 9:02:22 PM         Inj       :    1
                                                Inj Volume: 3.000 µl

Acq. Method     : D:\DATA\ZXH\MJM-20210702\XX-1-122-RAC 2021-07-12 19-38-18\DAD-OD(1-2)-95-5-
                  0.5ML-3UL-220NM-60MIN.M
Last changed    : 4/22/2021 8:13:33 PM
Analysis Method : D:\METHOD\LG\DAD-OD(1-2)-90-10-0.5ML-3UL-ALL-60MIN.M
Last changed    : 7/13/2021 8:43:21 AM
                  (modified after loading)
Additional Info : Peak(s) manually integrated
=====
```

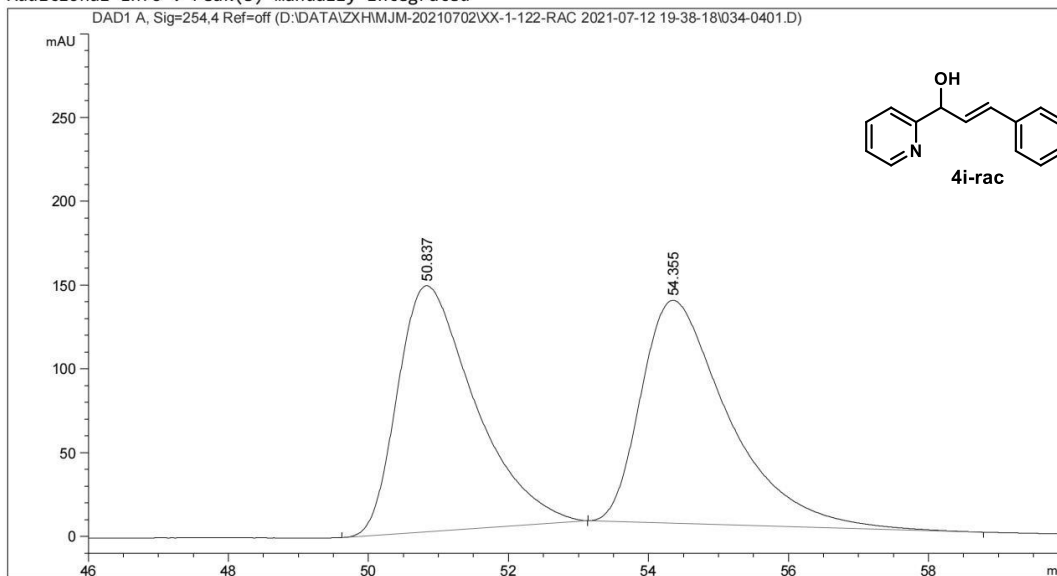

=====  
Area Percent Report  
=====

Sorted By : Signal  
Multiplier : 1.0000  
Dilution : 1.0000  
Use Multiplier & Dilution Factor with ISTDs

Signal 1: DAD1 A, Sig=254,4 Ref=off

| Peak # | RetTime [min] | Type | Width [min] | Area [mAU*s] | Height [mAU] | Area %  |
|--------|---------------|------|-------------|--------------|--------------|---------|
| 1      | 50.837        | BB   | 1.1393      | 1.12723e4    | 146.88838    | 49.4098 |
| 2      | 54.355        | BBA  | 1.2782      | 1.15416e4    | 133.03151    | 50.5902 |

Totals : 2.28138e4 279.91989

=====  
Acq. Operator : Seq. Line : 3  
Acq. Instrument : Instrument 2 Location : Vial 33  
Injection Date : 7/12/2021 8:01:23 PM Inj : 1  
Inj Volume : 3.000 µl  
Acq. Method : D:\DATA\ZXH\MJM-20210702\XX-1-122-RAC 2021-07-12 19-38-18\DAD-OD(1-2)-95-5-  
0.5ML-3UL-220NM-60MIN.M  
Last changed : 4/22/2021 8:13:33 PM  
Analysis Method : D:\METHOD\LG\DAD-OD(1-2)-90-10-0.5ML-3UL-ALL-60MIN.M  
Last changed : 7/13/2021 8:45:30 AM  
(modified after loading)  
Additional Info : Peak(s) manually integrated

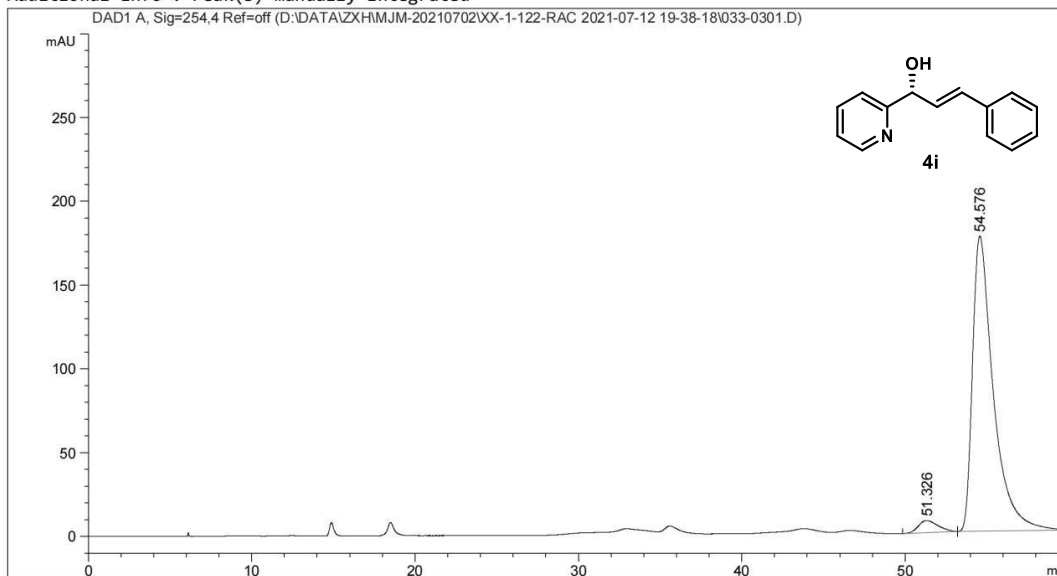

=====  
Area Percent Report  
=====

Sorted By : Signal  
Multiplier : 1.0000  
Dilution : 1.0000  
Use Multiplier & Dilution Factor with ISTDs

Signal 1: DAD1 A, Sig=254,4 Ref=off

| Peak # | RetTime [min] | Type | Width [min] | Area [mAU*s] | Height [mAU] | Area %  |
|--------|---------------|------|-------------|--------------|--------------|---------|
| 1      | 51.326        | BB   | 0.9966      | 612.13190    | 7.28317      | 3.7734  |
| 2      | 54.576        | BBA  | 1.2942      | 1.56100e4    | 176.09096    | 96.2266 |

Totals : 1.62221e4 183.37413

Data File D:\DATA\ZXH\MJM-20210702\MYC-92-6-RAC 2021-07-04 20-03-51\048-0301.D  
Sample Name: MJM-18-RAC

=====  
Acq. Operator : Seq. Line : 3  
Acq. Instrument : Instrument 2 Location : Vial 48  
Injection Date : 7/4/2021 8:26:56 PM Inj : 1  
Inj Volume : 3.000 µl  
Acq. Method : D:\DATA\ZXH\MJM-20210702\MYC-92-6-RAC 2021-07-04 20-03-51\DAD-OD(1-2)-90-10  
-1.0ML-3UL-220NM-40MIN.M  
Last changed : 4/24/2021 11:29:01 AM  
Analysis Method : D:\METHOD\MYC\DAD-OJ(1-6)-80-20-0.3ML-5UL-ALL-90MIN.M  
Last changed : 7/5/2021 9:55:24 AM  
(modified after loading)  
Additional Info : Peak(s) manually integrated

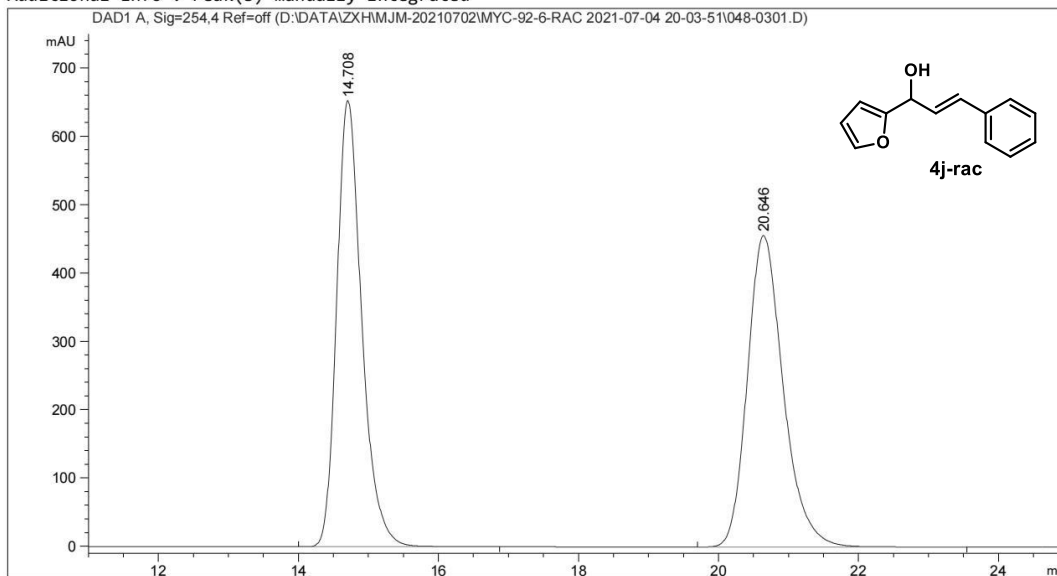

=====  
Area Percent Report  
=====

Sorted By : Signal  
Multiplier : 1.0000  
Dilution : 1.0000  
Use Multiplier & Dilution Factor with ISTDs

Signal 1: DAD1 A, Sig=254,4 Ref=off

| Peak # | RetTime [min] | Type | Width [min] | Area [mAU*s] | Height [mAU] | Area %  |
|--------|---------------|------|-------------|--------------|--------------|---------|
| 1      | 14.708        | BB   | 0.3779      | 1.62117e4    | 652.50378    | 49.9940 |
| 2      | 20.646        | BB   | 0.5471      | 1.62156e4    | 455.70313    | 50.0060 |

Totals : 3.24274e4 1108.20691

Data File D:\DATA\ZXH\MJM-20210702\MYC-92-6-RAC 2021-07-04 20-03-51\047-1201.D  
Sample Name: MJM-18

```
=====
Acq. Operator   :                               Seq. Line :   12
Acq. Instrument : Instrument 2                   Location  : Vial 47
Injection Date  : 7/5/2021 2:35:51 AM          Inj       :    1
                                                    Inj Volume: 3.000 µl

Acq. Method     : D:\DATA\ZXH\MJM-20210702\MYC-92-6-RAC 2021-07-04 20-03-51\DAD-OD(1-2)-90-10
                  -1.0ML-3UL-220NM-40MIN.M
Last changed    : 4/24/2021 11:29:01 AM
Analysis Method : D:\METHOD\MYC\DAD-OJ(1-6)-80-20-0.3ML-5UL-ALL-90MIN.M
Last changed    : 7/5/2021 9:47:04 AM
                  (modified after loading)
Additional Info  : Peak(s) manually integrated
=====
```

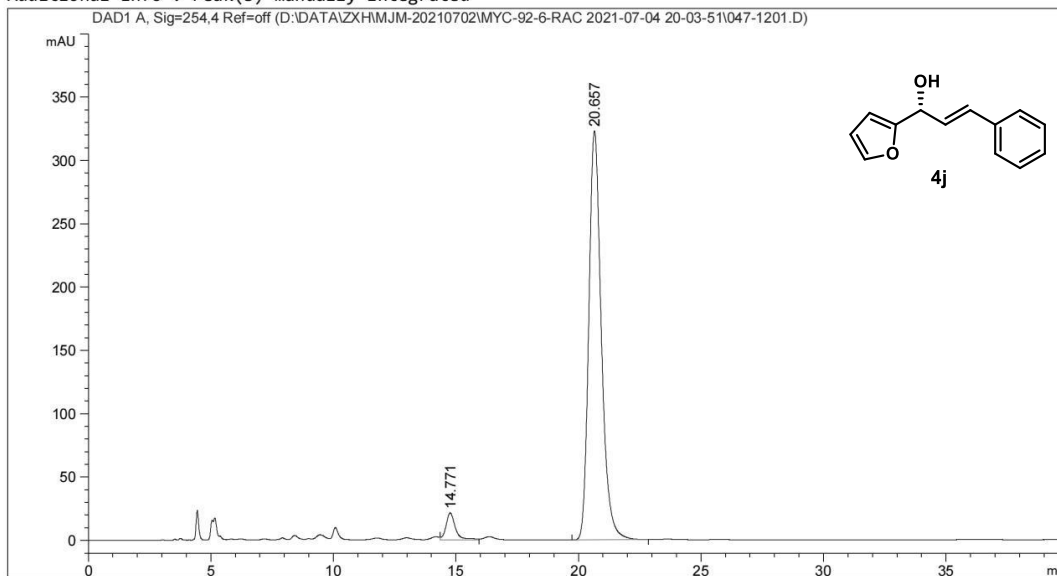

=====  
Area Percent Report  
=====

Sorted By : Signal  
Multiplier : 1.0000  
Dilution : 1.0000  
Use Multiplier & Dilution Factor with ISTDs

Signal 1: DAD1 A, Sig=254,4 Ref=off

| Peak # | RetTime [min] | Type | Width [min] | Area [mAU*s] | Height [mAU] | Area %  |
|--------|---------------|------|-------------|--------------|--------------|---------|
| 1      | 14.771        | VV   | 0.3956      | 568.26611    | 21.27679     | 4.7236  |
| 2      | 20.657        | BB   | 0.5421      | 1.14622e4    | 322.92261    | 95.2764 |

Totals : 1.20304e4 344.19939

Data File D:\DATA\JIAOBING\DATA\MJM-2-40\ZJ-2021-12-04 2021-12-06 10-00-12\047-1401.D  
 Sample Name: MJM-40-8-RAC

```

=====
Acq. Operator   :                               Seq. Line :   14
Acq. Instrument : Instrument 2                 Location  : Vial 47
Injection Date  : 12/6/2021 6:44:39 PM       Inj       :    1
                                           Inj Volume: 3.000 µl

Acq. Method    : D:\DATA\JIAOBING\DATA\MJM-2-40\ZJ-2021-12-04 2021-12-06 10-00-12\DAD-OD(1-6
                )-90-10-1.0ML-3UL-220NM-90MIN.M
Last changed   : 12/5/2021 6:42:59 PM
Analysis Method : D:\METHOD\ZXH\DAD-OD(1-6)-80-20-1.0ML-3UL-220NM-60MIN.M
Last changed   : 12/7/2021 9:32:14 AM
                (modified after loading)
Additional Info : Peak(s) manually integrated
  
```

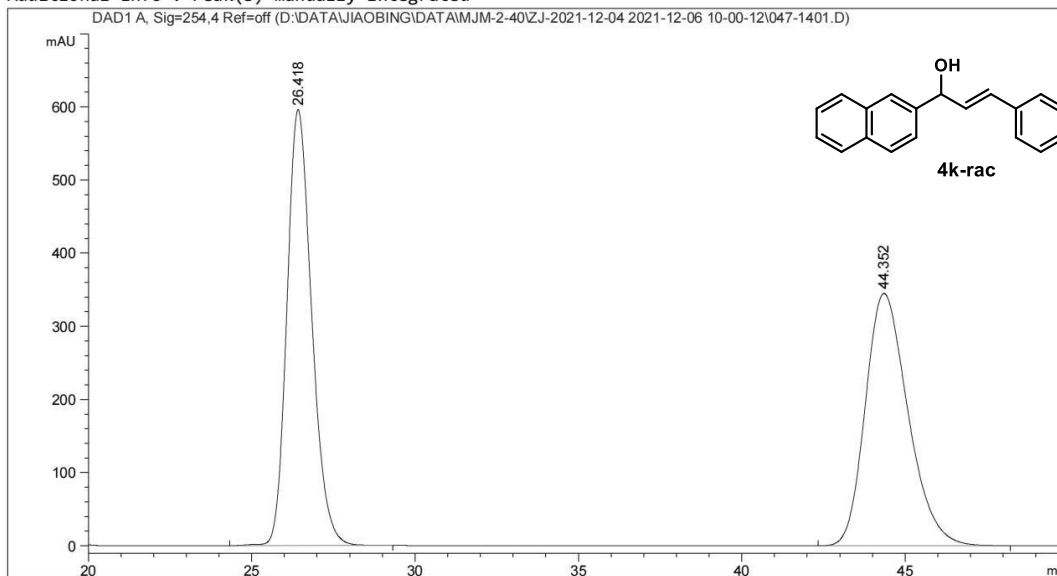

Area Percent Report

```

Sorted By      :      Signal
Multiplier     :      1.0000
Dilution       :      1.0000
Use Multiplier & Dilution Factor with ISTDs
  
```

Signal 1: DAD1 A, Sig=254,4 Ref=off

| Peak # | RetTime [min] | Type | Width [min] | Area [mAU*s] | Height [mAU] | Area %  |
|--------|---------------|------|-------------|--------------|--------------|---------|
| 1      | 26.418        | BB   | 0.8121      | 3.13856e4    | 596.29742    | 50.0536 |
| 2      | 44.352        | BB   | 1.3711      | 3.13183e4    | 344.98941    | 49.9464 |

Totals :                    6.27039e4   941.28683

Data File D:\DATA\JIAOBING\DATA\MJM-2-40\ZJ-2021-12-04 2021-12-05 18-41-31\018-0401.D  
Sample Name: MJM-40-8

=====  
Acq. Operator : Seq. Line : 4  
Acq. Instrument : Instrument 2 Location : Vial 18  
Injection Date : 12/5/2021 8:36:12 PM Inj : 1  
Inj Volume : 3.000 µl  
Acq. Method : D:\DATA\JIAOBING\DATA\MJM-2-40\ZJ-2021-12-04 2021-12-05 18-41-31\DAD-OD(1-6  
) -90-10-1.0ML-3UL-220NM-90MIN.M  
Last changed : 12/5/2021 6:42:59 PM  
Analysis Method : D:\METHOD\ZXH\DAD-OD(1-6)-80-20-1.0ML-3UL-220NM-60MIN.M  
Last changed : 12/7/2021 9:39:44 AM  
(modified after loading)  
Additional Info : Peak(s) manually integrated

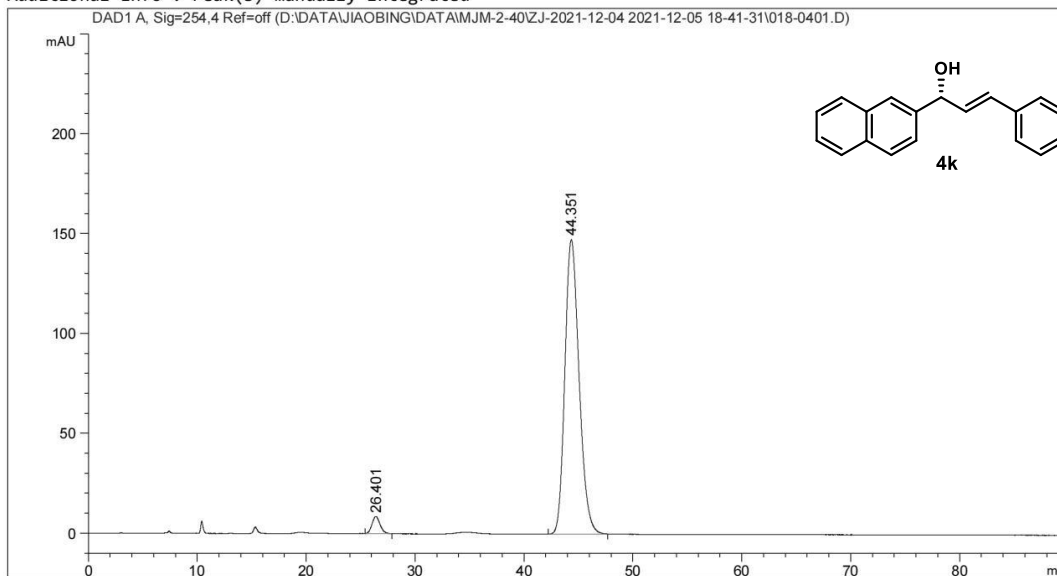

=====  
Area Percent Report  
=====

Sorted By : Signal  
Multiplier : 1.0000  
Dilution : 1.0000  
Use Multiplier & Dilution Factor with ISTDs

Signal 1: DAD1 A, Sig=254,4 Ref=off

| Peak # | RetTime [min] | Type | Width [min] | Area [mAU*s] | Height [mAU] | Area %  |
|--------|---------------|------|-------------|--------------|--------------|---------|
| 1      | 26.401        | BB   | 0.6562      | 440.75201    | 8.53818      | 3.1924  |
| 2      | 44.351        | BB   | 1.3561      | 1.33656e4    | 147.36328    | 96.8076 |

Totals : 1.38063e4 155.90146



Data File D:\DATA\ZXH\MJM-92\TJY-2-2100-2 2021-03-26 17-33-53\034-0401.D  
Sample Name: MJM-92-6-RAC

=====  
Acq. Operator : Seq. Line : 4  
Acq. Instrument : Instrument 1 Location : Vial 34  
Injection Date : 3/26/2021 6:59:24 PM Inj : 1  
Inj Volume : 3.000 µl  
Acq. Method : D:\DATA\ZXH\MJM-92\TJY-2-2100-2 2021-03-26 17-33-53\VWD-OD(1-2)-90-10-1ML-  
3UL-210NM-40MIN.M  
Last changed : 3/25/2021 10:15:35 AM  
Analysis Method : D:\DATA\ZXH\MJM-92\TJY-2-2100-2 2021-03-26 17-33-53\034-0401.D\DA.M (VWD-OD  
(1-2)-90-10-1ML-3UL-210NM-40MIN.M, From Data File)  
Last changed : 3/26/2021 9:01:40 PM  
(modified after loading)  
Additional Info : Peak(s) manually integrated

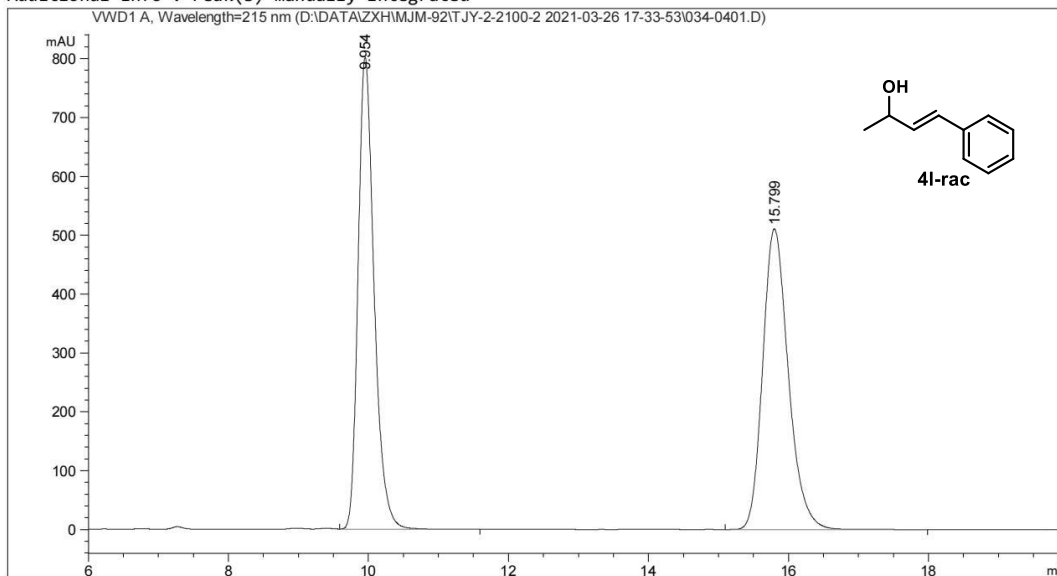

=====  
Area Percent Report  
=====

Sorted By : Signal  
Multiplier : 1.0000  
Dilution : 1.0000  
Use Multiplier & Dilution Factor with ISTDs

Signal 1: VWD1 A, Wavelength=215 nm

| Peak # | RetTime [min] | Type | Width [min] | Area [mAU*s] | Height [mAU] | Area %  |
|--------|---------------|------|-------------|--------------|--------------|---------|
| 1      | 9.954         | VB   | 0.2437      | 1.27655e4    | 801.92676    | 49.5786 |
| 2      | 15.799        | BB   | 0.3915      | 1.29825e4    | 510.90018    | 50.4214 |

Totals : 2.57481e4 1312.82693

Data File D:\DATA\ZXH\MJM-92\TJY-2-2100-2 2021-03-26 17-33-53\033-0301.D  
Sample Name: MJM-92-6

=====  
Acq. Operator : Seq. Line : 3  
Acq. Instrument : Instrument 1 Location : Vial 33  
Injection Date : 3/26/2021 6:18:34 PM Inj : 1  
Inj Volume : 3.000 µl  
Acq. Method : D:\DATA\ZXH\MJM-92\TJY-2-2100-2 2021-03-26 17-33-53\VWD-OD(1-2)-90-10-1ML-  
3UL-210NM-40MIN.M  
Last changed : 3/25/2021 10:15:35 AM  
Analysis Method : D:\METHOD\ZXH\DAD-OD(1-6)-95-5-1ML-2UL-220NM-20MIN.M  
Last changed : 12/11/2021 9:49:50 AM  
(modified after loading)  
Additional Info : Peak(s) manually integrated

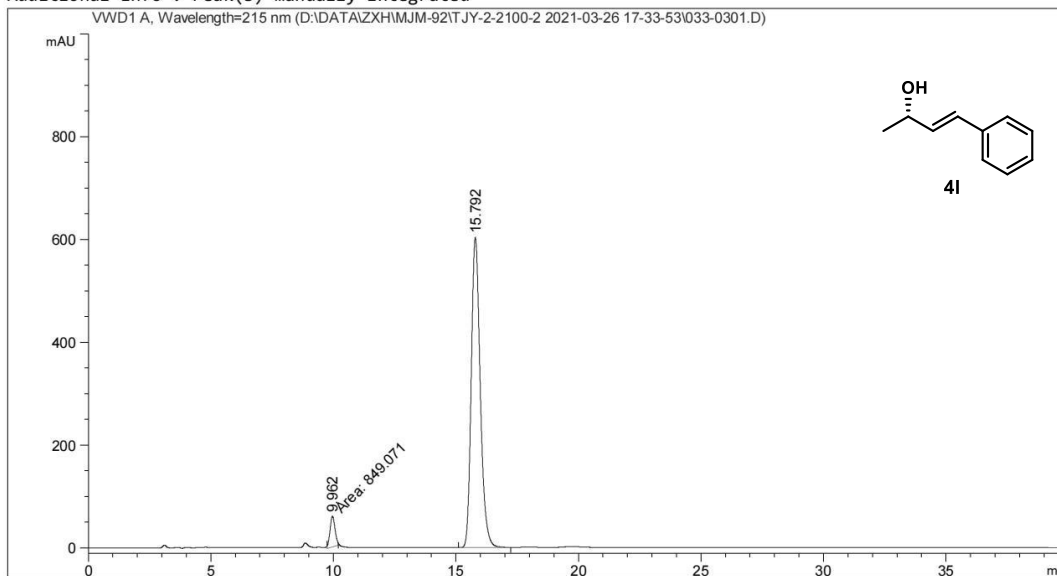

=====  
Area Percent Report  
=====

Sorted By : Signal  
Multiplier : 1.0000  
Dilution : 1.0000  
Use Multiplier & Dilution Factor with ISTDs

Signal 1: VWD1 A, Wavelength=215 nm

| Peak # | RetTime [min] | Type | Width [min] | Area [mAU*s] | Height [mAU] | Area %  |
|--------|---------------|------|-------------|--------------|--------------|---------|
| 1      | 9.962         | MM   | 0.2370      | 849.07104    | 59.71696     | 5.2330  |
| 2      | 15.792        | BB   | 0.3925      | 1.53763e4    | 603.05988    | 94.7670 |

Totals : 1.62254e4 662.77683

=====  
Acq. Operator : Seq. Line : 4  
Acq. Instrument : Instrument 2 Location : Vial 44  
Injection Date : 9/7/2021 3:39:55 PM Inj : 1  
Inj Volume : 3.000 µl  
Acq. Method : D:\DATA\LG\RJD-SDD-S-RAC-OPT\RJD-SDD-S-RAC-OPT 2021-09-07 14-34-06\DAD-OD(1  
-2)-90-10-1.0ML-3UL-220NM-40MIN.M  
Last changed : 4/24/2021 11:29:01 AM  
Analysis Method : D:\METHOD\LG\DAD-AS(1-6)95-5-0.5ML-5UL-ALL-10MIN.M  
Last changed : 9/7/2021 8:02:20 PM  
(modified after loading)  
Additional Info : Peak(s) manually integrated

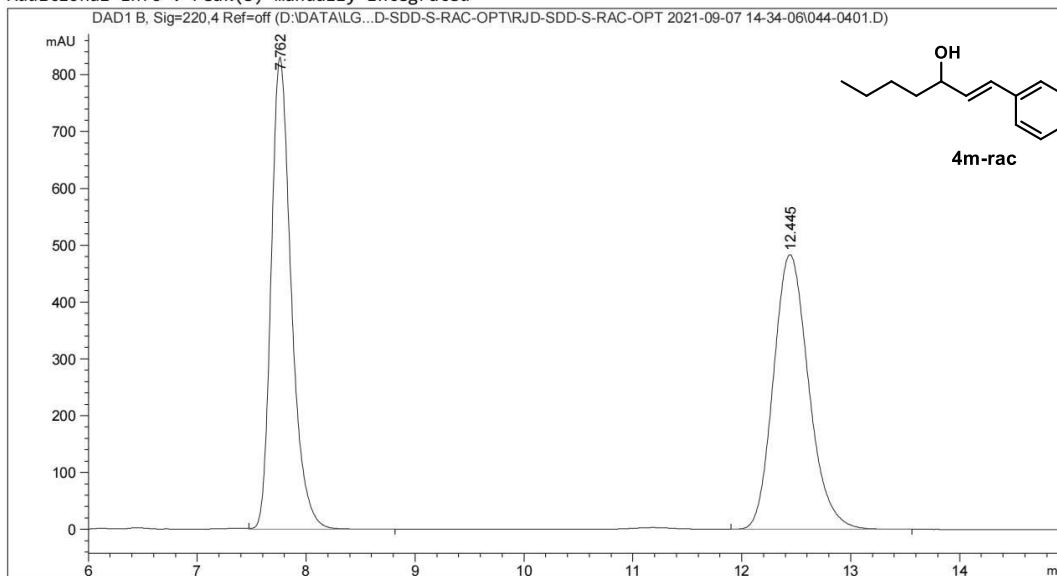

=====  
Area Percent Report  
=====

Sorted By : Signal  
Multiplier : 1.0000  
Dilution : 1.0000  
Use Multiplier & Dilution Factor with ISTDs

Signal 1: DAD1 B, Sig=220,4 Ref=off

| Peak # | RetTime [min] | Type | Width [min] | Area [mAU*s] | Height [mAU] | Area %  |
|--------|---------------|------|-------------|--------------|--------------|---------|
| 1      | 7.762         | VB   | 0.1954      | 1.06399e4    | 830.67584    | 49.5190 |
| 2      | 12.445        | BB   | 0.3517      | 1.08466e4    | 483.52878    | 50.4810 |

Totals : 2.14864e4 1314.20462

```

=====
Acq. Operator   :                               Seq. Line :    3
Acq. Instrument : Instrument 2                   Location  : Vial 43
Injection Date  : 9/7/2021 2:58:54 PM          Inj       :    1
                                           Inj Volume: 3.000 µl

Acq. Method     : D:\DATA\LG\RJD-SDD-S-RAC-OPT\RJD-SDD-S-RAC-OPT 2021-09-07 14-34-06\DAD-OD(1
                  -2)-90-10-1.0ML-3UL-220NM-40MIN.M
Last changed    : 4/24/2021 11:29:01 AM
Analysis Method : D:\METHOD\LG\DAD-AS(1-6)95-5-0.5ML-5UL-ALL-10MIN.M
Last changed    : 9/7/2021 8:00:47 PM
                  (modified after loading)
Additional Info  : Peak(s) manually integrated
  
```

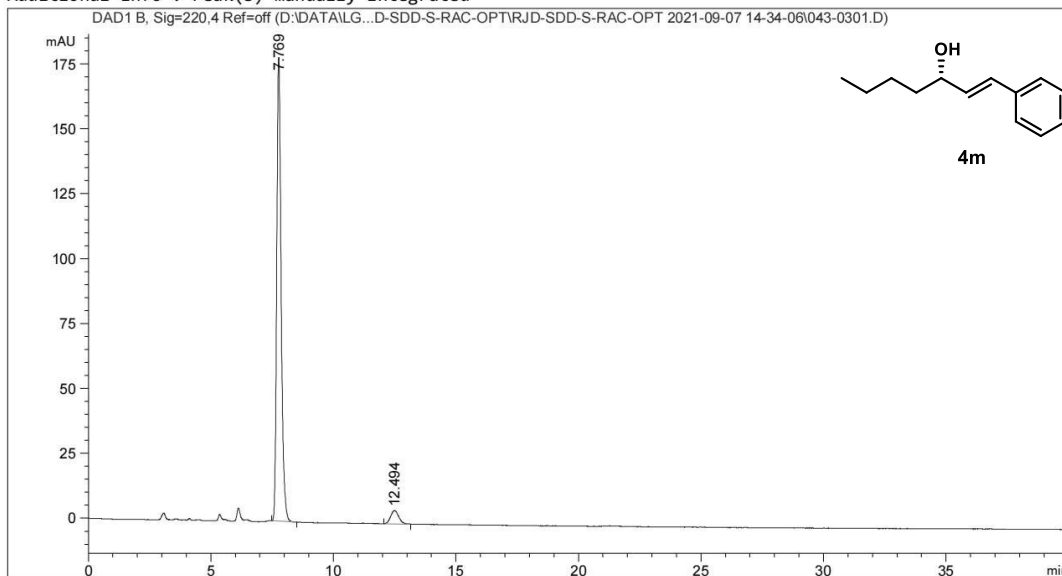

Area Percent Report

```

=====
Sorted By      :      Signal
Multiplier     :      1.0000
Dilution      :      1.0000
Use Multiplier & Dilution Factor with ISTDs
  
```

Signal 1: DAD1 B, Sig=220,4 Ref=off

| Peak # | RetTime [min] | Type | Width [min] | Area [mAU*s] | Height [mAU] | Area %  |
|--------|---------------|------|-------------|--------------|--------------|---------|
| 1      | 7.769         | BB   | 0.1891      | 2224.87915   | 178.83931    | 94.9420 |
| 2      | 12.494        | BB   | 0.3179      | 118.53072    | 5.12311      | 5.0580  |

Totals :                                    2343.40987   183.96242

=====  
Acq. Operator : Seq. Line : 9  
Acq. Instrument : Instrument 2 Location : Vial 24  
Injection Date : 3/23/2021 7:15:48 PM Inj : 1  
Inj Volume : 3.000 µl  
Acq. Method : D:\DATA\ZXH\MJM-90\YZY-1-106 2021-03-23 15-14-03\DAD-IC(1-6)-95-5-1ML-3UL-  
ALL-40MIN.M  
Last changed : 3/19/2021 7:41:20 PM  
Analysis Method : D:\METHOD\LG\DAD-AS(1-2)-95-5--1ML-5UL-ALL-60MIN.M  
Last changed : 3/23/2021 8:11:59 PM  
(modified after loading)

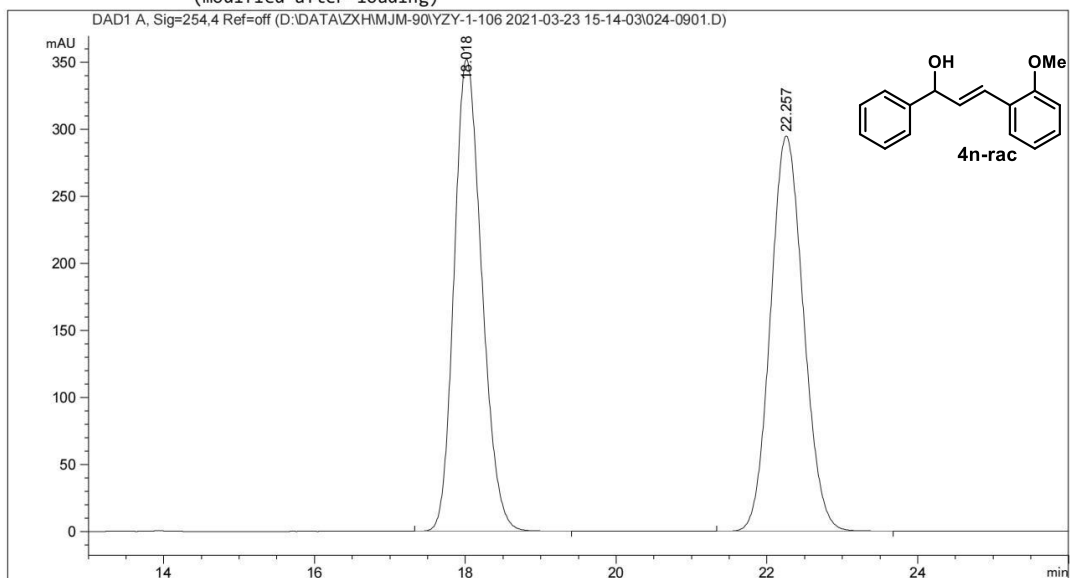

=====  
Area Percent Report  
=====

Sorted By : Signal  
Multiplier : 1.0000  
Dilution : 1.0000  
Use Multiplier & Dilution Factor with ISTDs

Signal 1: DAD1 A, Sig=254,4 Ref=off

| Peak # | RetTime [min] | Type | Width [min] | Area [mAU*s] | Height [mAU] | Area %  |
|--------|---------------|------|-------------|--------------|--------------|---------|
| 1      | 18.018        | BB   | 0.3943      | 8932.91309   | 351.77542    | 49.9900 |
| 2      | 22.257        | BB   | 0.4739      | 8936.49316   | 294.58200    | 50.0100 |

Totals : 1.78694e4 646.35742

```

=====
Acq. Operator   :                               Seq. Line :    8
Acq. Instrument : Instrument 2                   Location  : Vial 23
Injection Date  : 3/23/2021 6:34:50 PM         Inj       :    1
                                                    Inj Volume: 3.000 µl

Acq. Method     : D:\DATA\ZXH\MJM-90\YZY-1-106 2021-03-23 15-14-03\DAD-IC(1-6)-95-5-1ML-3UL-
                  ALL-40MIN.M
Last changed    : 3/19/2021 7:41:20 PM
Analysis Method : D:\METHOD\LG\DAD-AS(1-2)-95-5--1ML-5UL-ALL-60MIN.M
Last changed    : 3/23/2021 8:12:33 PM
                  (modified after loading)
=====
  
```

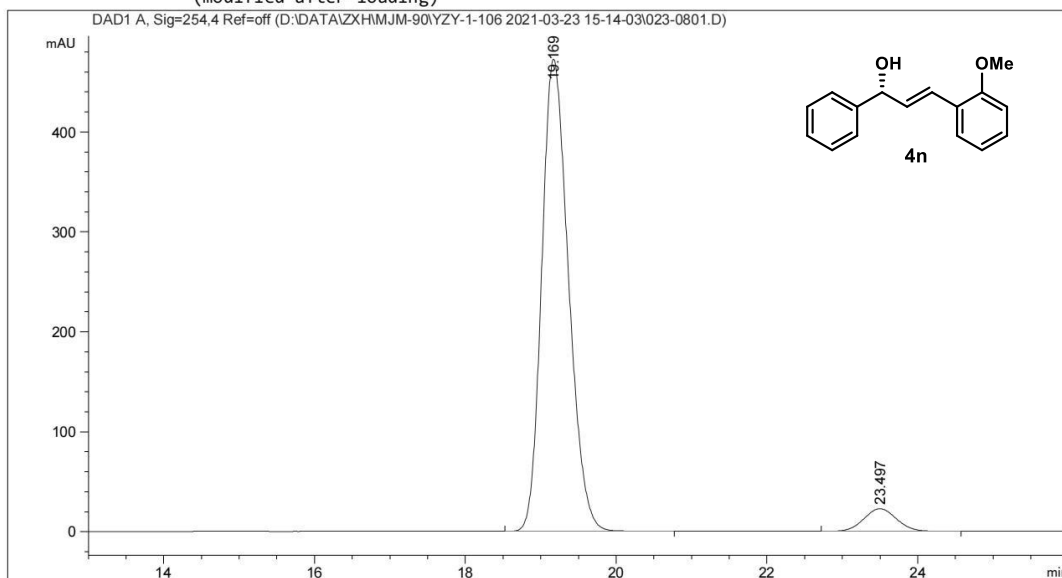

=====  
 Area Percent Report  
 =====

```

Sorted By      :      Signal
Multiplier     :      1.0000
Dilution       :      1.0000
Use Multiplier & Dilution Factor with ISTDs
  
```

Signal 1: DAD1 A, Sig=254,4 Ref=off

| Peak # | RetTime [min] | Type | Width [min] | Area [mAU*s] | Height [mAU] | Area %  |
|--------|---------------|------|-------------|--------------|--------------|---------|
| 1      | 19.169        | BB   | 0.3813      | 1.16268e4    | 472.19525    | 94.4814 |
| 2      | 23.497        | BB   | 0.4644      | 679.11884    | 22.61008     | 5.5186  |

Totals :                                    1.23059e4    494.80533

=====  
Acq. Operator : Seq. Line : 8  
Acq. Instrument : Instrument 2 Location : Vial 36  
Injection Date : 7/12/2021 2:46:57 PM Inj : 1  
Inj Volume : 3.000 µl  
Acq. Method : D:\DATA\ZXH\MJM-20210702\XX-1-122-RAC 2021-07-12 10-55-46\DAD-OD(1-2)-90-10  
-1.0ML-3UL-220NM-40MIN.M  
Last changed : 4/24/2021 11:29:01 AM  
Analysis Method : D:\METHOD\LG\DAD-OD(1-2)-90-10-0.5ML-3UL-ALL-60MIN.M  
Last changed : 7/12/2021 7:34:10 PM  
(modified after loading)  
Additional Info : Peak(s) manually integrated

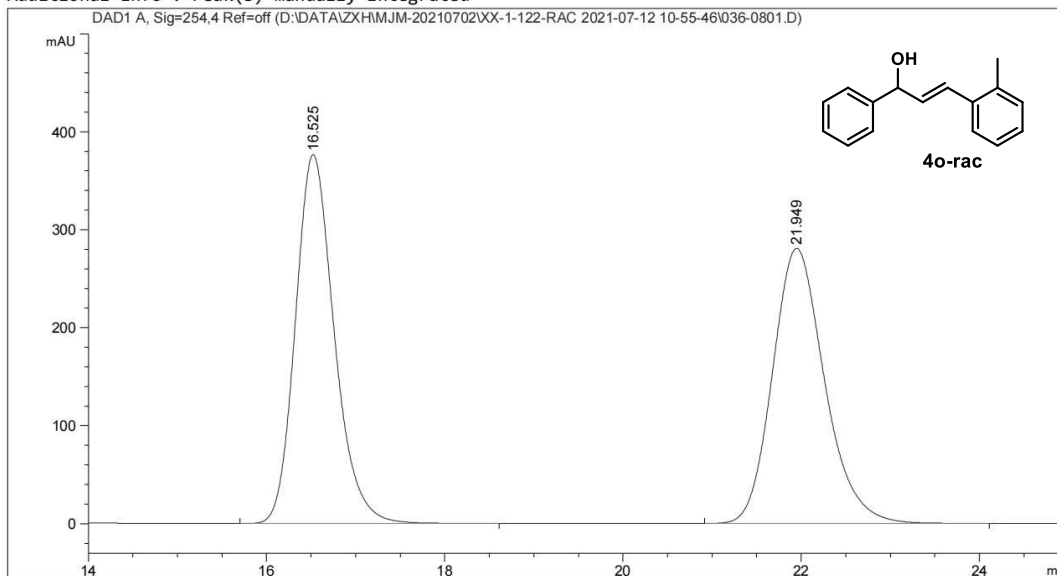

=====  
Area Percent Report  
=====

Sorted By : Signal  
Multiplier : 1.0000  
Dilution : 1.0000  
Use Multiplier & Dilution Factor with ISTDs

Signal 1: DAD1 A, Sig=254,4 Ref=off

| Peak # | RetTime [min] | Type | Width [min] | Area [mAU*s] | Height [mAU] | Area %  |
|--------|---------------|------|-------------|--------------|--------------|---------|
| 1      | 16.525        | BB   | 0.4652      | 1.13998e4    | 376.50699    | 50.0509 |
| 2      | 21.949        | BB   | 0.6230      | 1.13766e4    | 280.62466    | 49.9491 |

Totals : 2.27764e4 657.13165

Data File D:\DATA\ZXH\MJM-20210702\XX-1-122-RAC 2021-07-12 10-55-46\035-0701.D  
Sample Name: MJM-22

=====  
Acq. Operator : Seq. Line : 7  
Acq. Instrument : Instrument 2 Location : Vial 35  
Injection Date : 7/12/2021 2:05:57 PM Inj : 1  
Inj Volume : 3.000 µl  
Acq. Method : D:\DATA\ZXH\MJM-20210702\XX-1-122-RAC 2021-07-12 10-55-46\DAD-OD(1-2)-90-10  
-1.0ML-3UL-220NM-40MIN.M  
Last changed : 4/24/2021 11:29:01 AM  
Analysis Method : D:\METHOD\LG\DAD-OD(1-2)-90-10-0.5ML-3UL-ALL-60MIN.M  
Last changed : 7/12/2021 7:34:55 PM  
(modified after loading)  
Additional Info : Peak(s) manually integrated

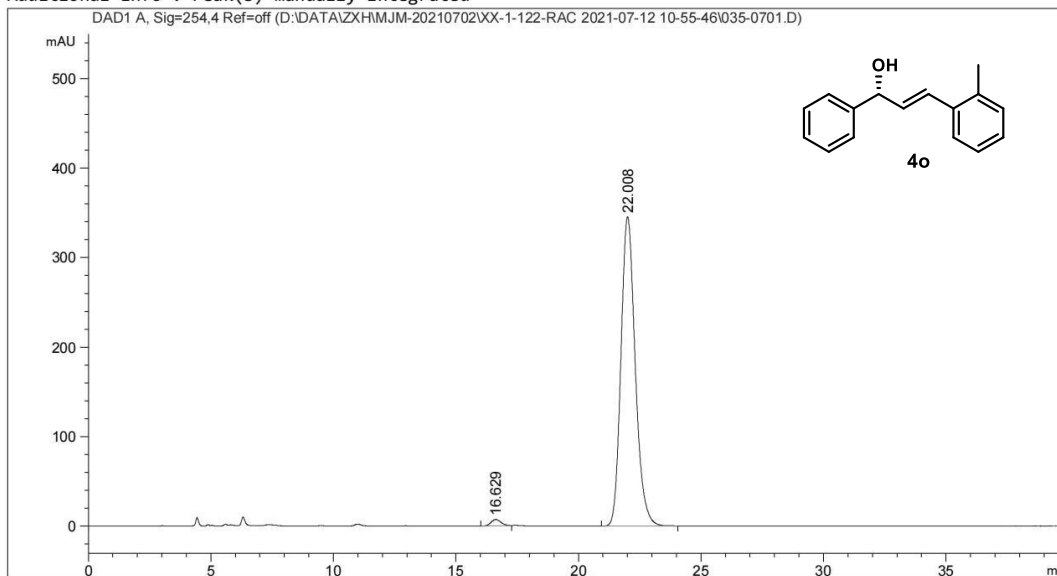

=====  
Area Percent Report  
=====

Sorted By : Signal  
Multiplier : 1.0000  
Dilution : 1.0000  
Use Multiplier & Dilution Factor with ISTDs

Signal 1: DAD1 A, Sig=254,4 Ref=off

| Peak # | RetTime [min] | Type | Width [min] | Area [mAU*s] | Height [mAU] | Area %  |
|--------|---------------|------|-------------|--------------|--------------|---------|
| 1      | 16.629        | BB   | 0.4255      | 192.38765    | 6.98156      | 1.3567  |
| 2      | 22.008        | BB   | 0.6226      | 1.39881e4    | 345.31104    | 98.6433 |

Totals : 1.41805e4 352.29260



```
=====
Acq. Operator   :                               Seq. Line :    4
Acq. Instrument : Instrument 2                  Location  : Vial 32
Injection Date  : 7/2/2021 10:27:51 AM        Inj       :    1
                                           Inj Volume: 3.000 µl
Acq. Method     : D:\DATA\ZXH\MJM-20210702\MYC-92-6-RAC 2021-07-02 09-19-10\DAD-OD(1-2)-92-8-
                  0.5ML-3UL-220NM-40MIN.M
Last changed    : 7/2/2021 9:17:17 AM
Analysis Method : D:\METHOD\ZXH\DAD-OD(1-2)-92-8-0.5ML-3UL-220NM-40MIN.M
Last changed    : 7/2/2021 3:09:51 PM
                  (modified after loading)
Additional Info  : Peak(s) manually integrated
=====
```

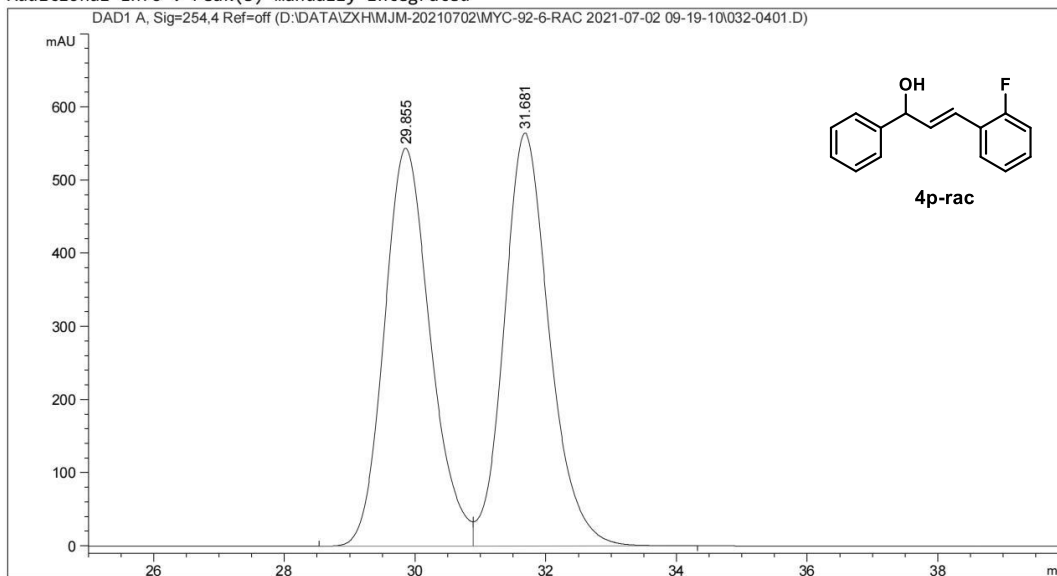

=====  
Area Percent Report  
=====

Sorted By : Signal  
Multiplier : 1.0000  
Dilution : 1.0000  
Use Multiplier & Dilution Factor with ISTDs

Signal 1: DAD1 A, Sig=254,4 Ref=off

| Peak # | RetTime [min] | Type | Width [min] | Area [mAU*s] | Height [mAU] | Area %  |
|--------|---------------|------|-------------|--------------|--------------|---------|
| 1      | 29.855        | BV   | 0.7485      | 2.66012e4    | 543.97650    | 49.5036 |
| 2      | 31.681        | VB   | 0.7347      | 2.71346e4    | 564.63385    | 50.4964 |

Totals :                      5.37359e4 1108.61035

=====  
Acq. Operator : Seq. Line : 3  
Acq. Instrument : Instrument 2 Location : Vial 31  
Injection Date : 7/2/2021 9:46:54 AM Inj : 1  
Inj Volume : 3.000 µl  
Acq. Method : D:\DATA\ZXH\MJM-20210702\MYC-92-6-RAC 2021-07-02 09-19-10\DAD-OD(1-2)-92-8-  
0.5ML-3UL-220NM-40MIN.M  
Last changed : 7/2/2021 9:17:17 AM  
Analysis Method : D:\METHOD\ZXH\DAD-OD(1-2)-92-8-0.5ML-3UL-220NM-40MIN.M  
Last changed : 7/2/2021 3:08:18 PM  
(modified after loading)  
Additional Info : Peak(s) manually integrated

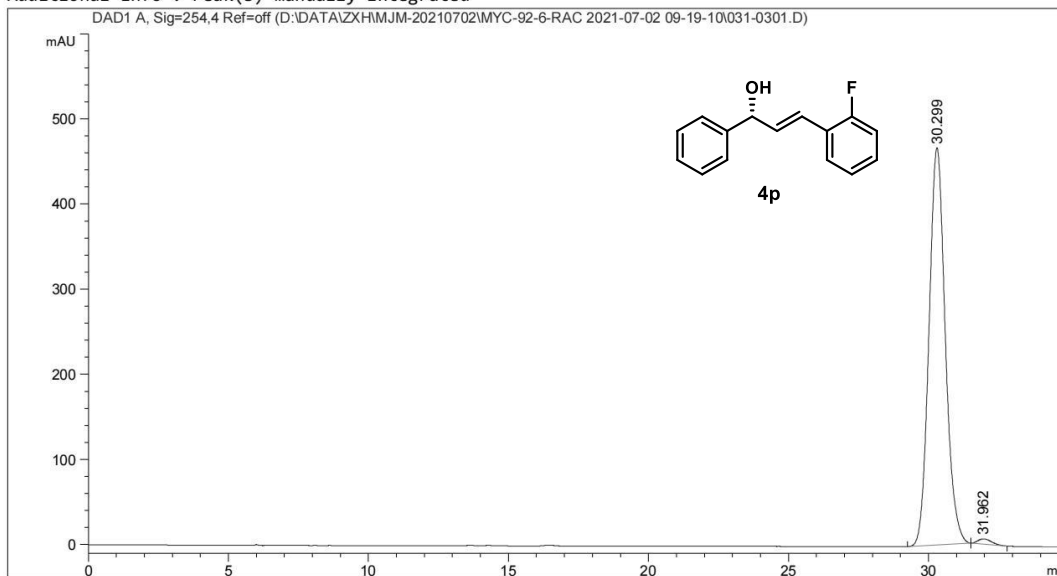

=====  
Area Percent Report  
=====

Sorted By : Signal  
Multiplier : 1.0000  
Dilution : 1.0000  
Use Multiplier & Dilution Factor with ISTDs

Signal 1: DAD1 A, Sig=254,4 Ref=off

| Peak # | RetTime [min] | Type | Width [min] | Area [mAU*s] | Height [mAU] | Area %  |
|--------|---------------|------|-------------|--------------|--------------|---------|
| 1      | 30.299        | BB   | 0.6190      | 1.88381e4    | 466.57147    | 98.9066 |
| 2      | 31.962        | BB   | 0.4961      | 208.24881    | 6.22854      | 1.0934  |

Totals : 1.90463e4 472.80001

```

=====
Acq. Operator   :                               Seq. Line :   11
Acq. Instrument : Instrument 2                   Location  : Vial 44
Injection Date  : 12/6/2021 3:51:36 PM          Inj       :    1
                                           Inj Volume: 3.000 µl

Acq. Method    : D:\DATA\JIAOBING\DATA\MJM-2-40\ZJ-2021-12-04 2021-12-06 10-00-12\DAD-OD(1-6
                )-90-10-1.0ML-3UL-220NM-90MIN.M
Last changed   : 12/5/2021 6:42:59 PM
Analysis Method: D:\METHOD\ZXH\DAD-OD(1-6)-80-20-1.0ML-3UL-220NM-60MIN.M
Last changed   : 12/7/2021 9:29:09 AM
                (modified after loading)
Additional Info : Peak(s) manually integrated
  
```

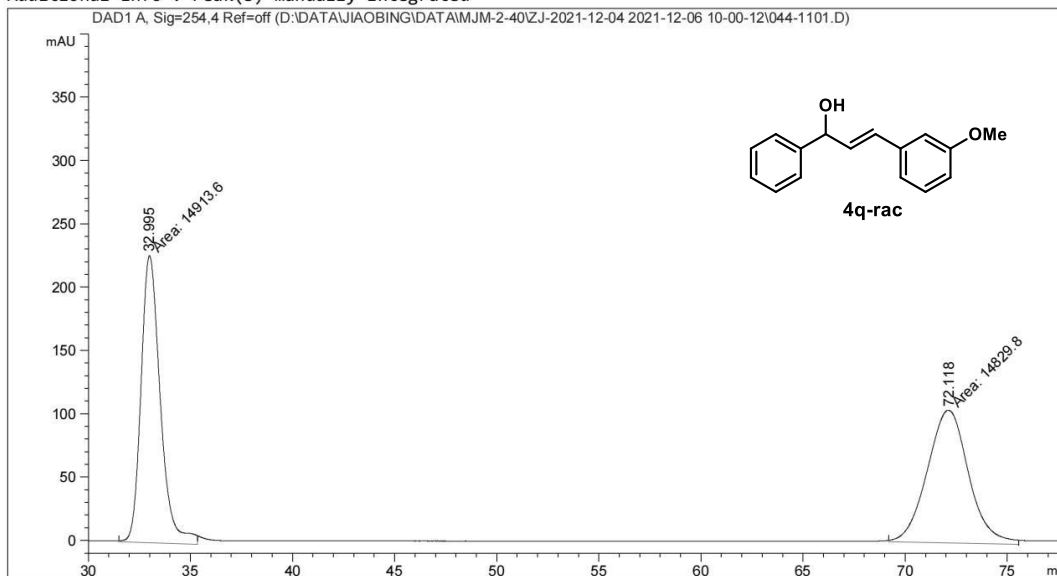

Area Percent Report

```

=====
Sorted By      :      Signal
Multiplier     :      1.0000
Dilution       :      1.0000
Use Multiplier & Dilution Factor with ISTDs
  
```

Signal 1: DAD1 A, Sig=254,4 Ref=off

| Peak # | RetTime [min] | Type | Width [min] | Area [mAU*s] | Height [mAU] | Area %  |
|--------|---------------|------|-------------|--------------|--------------|---------|
| 1      | 32.995        | MM   | 1.0964      | 1.49136e4    | 226.70805    | 50.1407 |
| 2      | 72.118        | MM   | 2.3562      | 1.48298e4    | 104.90143    | 49.8593 |

Totals :                                    2.97434e4    331.60948

Data File D:\DATA\JIAOBING\DATA\MJM-2-40\ZJ-2021-12-04 2021-12-05 18-41-31\014-0301.D  
 Sample Name: MJM-40-4

```

=====
Acq. Operator   :                               Seq. Line :    3
Acq. Instrument : Instrument 2                   Location  : Vial 14
Injection Date  : 12/5/2021 7:05:15 PM         Inj       :    1
                                                    Inj Volume: 3.000 µl

Acq. Method    : D:\DATA\JIAOBING\DATA\MJM-2-40\ZJ-2021-12-04 2021-12-05 18-41-31\DAD-OD(1-6)
                  )-90-10-1.0ML-3UL-220NM-90MIN.M
Last changed   : 12/5/2021 6:42:59 PM
Analysis Method : D:\METHOD\ZXH\DAD-OD(1-6)-80-20-1.0ML-3UL-220NM-60MIN.M
Last changed   : 12/7/2021 9:42:54 AM
                  (modified after loading)
Additional Info : Peak(s) manually integrated
  
```

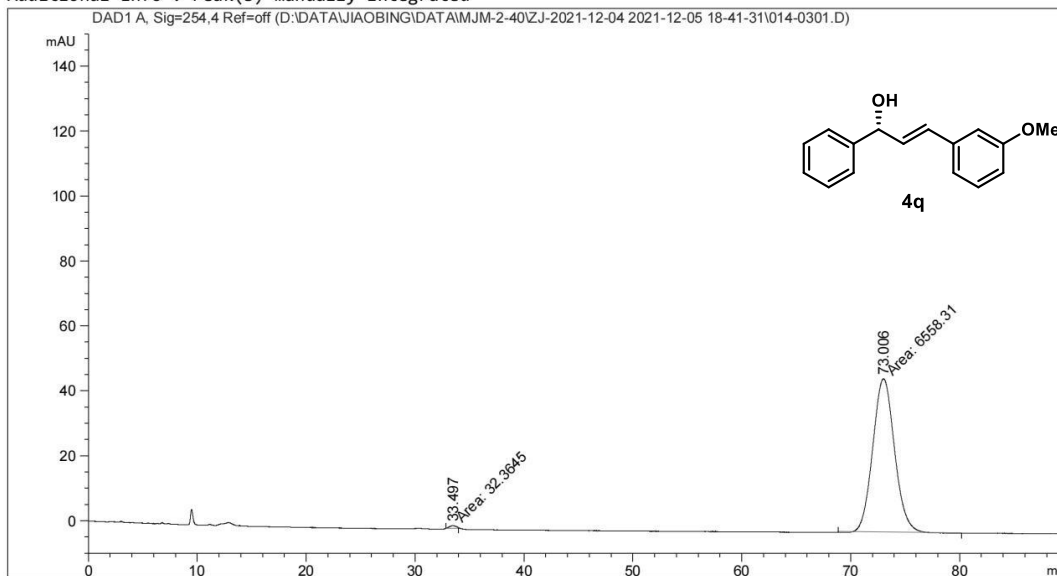

Area Percent Report

```

Sorted By      : Signal
Multiplier     : 1.0000
Dilution       : 1.0000
Use Multiplier & Dilution Factor with ISTDs
  
```

Signal 1: DAD1 A, Sig=254,4 Ref=off

| Peak # | RetTime [min] | Type | Width [min] | Area [mAU*s] | Height [mAU] | Area %  |
|--------|---------------|------|-------------|--------------|--------------|---------|
| 1      | 33.497        | MM   | 0.7052      | 32.36450     | 7.64905e-1   | 0.4911  |
| 2      | 73.006        | MM   | 2.3157      | 6558.30957   | 47.20269     | 99.5089 |

Totals :                    6590.67407    47.96760

=====  
Acq. Operator : Seq. Line : 22  
Acq. Instrument : Instrument 2 Location : Vial 46  
Injection Date : 7/1/2021 11:07:07 PM Inj : 1  
Inj Volume : 3.000 µl  
Acq. Method : D:\DATA\MYC\MYC-92-RAC\MYC-92-6-RAC 2021-07-01 10-21-10\DAD-OD(1-2)-90-10-1  
.0ML-3UL-220NM-40MIN.M  
Last changed : 4/24/2021 11:29:01 AM  
Analysis Method : D:\METHOD\ZXH\DAD-OD(1-2)-92-8-0.5ML-3UL-220NM-40MIN.M  
Last changed : 7/2/2021 10:59:37 AM  
(modified after loading)

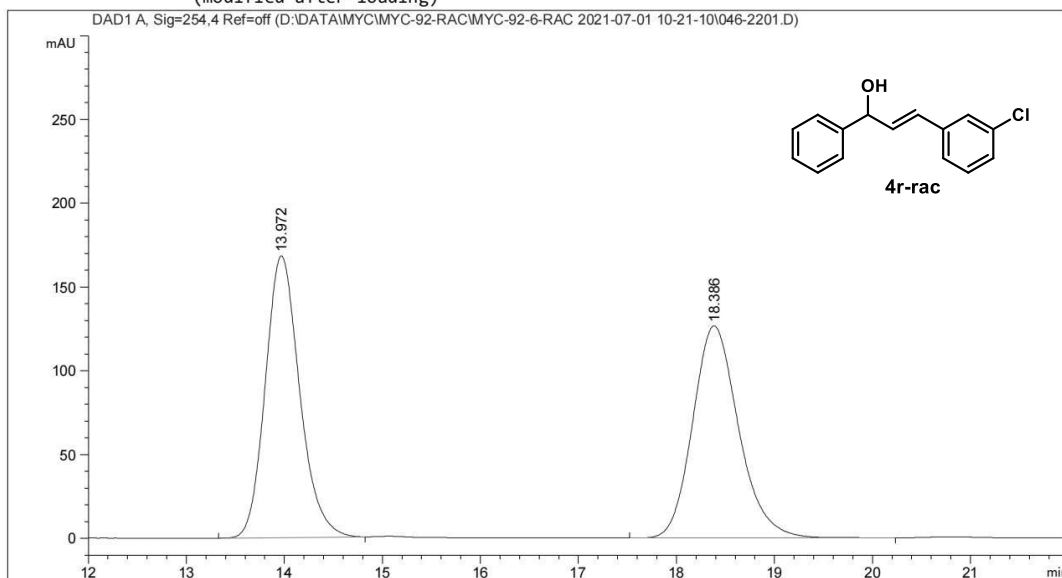

=====  
Area Percent Report  
=====

Sorted By : Signal  
Multiplier : 1.0000  
Dilution : 1.0000  
Use Multiplier & Dilution Factor with ISTDs

Signal 1: DAD1 A, Sig=254,4 Ref=off

| Peak # | RetTime [min] | Type | Width [min] | Area [mAU*s] | Height [mAU] | Area %  |
|--------|---------------|------|-------------|--------------|--------------|---------|
| 1      | 13.972        | BB   | 0.3735      | 4088.03174   | 168.26030    | 49.7875 |
| 2      | 18.386        | BB   | 0.5019      | 4122.92871   | 126.62140    | 50.2125 |

Totals : 8210.96045 294.88170

=====  
Acq. Operator : Seq. Line : 21  
Acq. Instrument : Instrument 2 Location : Vial 45  
Injection Date : 7/1/2021 10:26:09 PM Inj : 1  
Inj Volume : 3.000 µl  
Acq. Method : D:\DATA\MYC\MYC-92-RAC\MYC-92-6-RAC 2021-07-01 10-21-10\DAD-OD(1-2)-90-10-1  
.0ML-3UL-220NM-40MIN.M  
Last changed : 4/24/2021 11:29:01 AM  
Analysis Method : D:\METHOD\ZXH\DAD-OD(1-2)-92-8-0.5ML-3UL-220NM-40MIN.M  
Last changed : 7/2/2021 11:08:23 AM  
(modified after loading)  
Additional Info : Peak(s) manually integrated

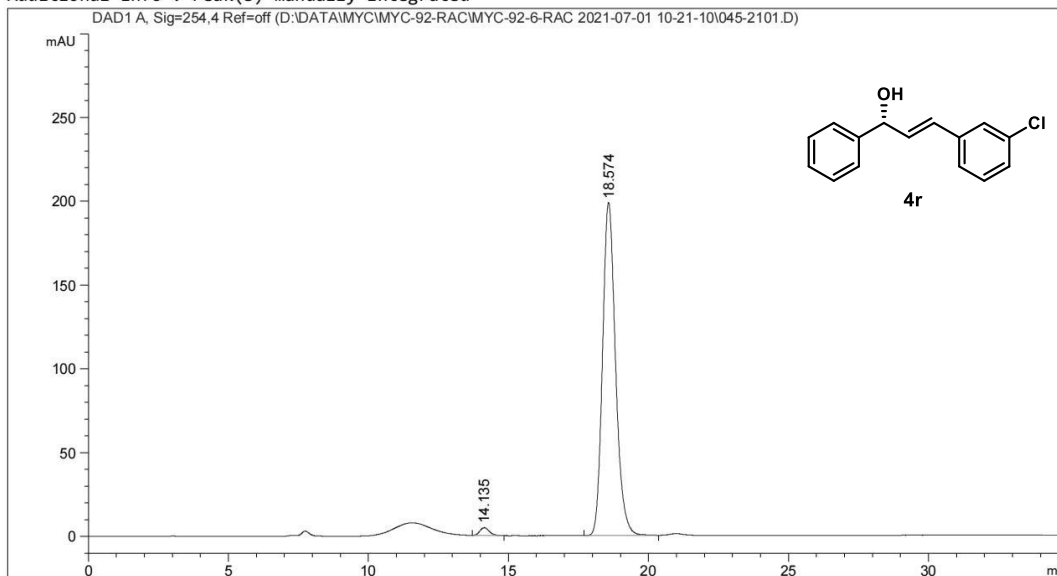

=====  
Area Percent Report  
=====

Sorted By : Signal  
Multiplier : 1.0000  
Dilution : 1.0000  
Use Multiplier & Dilution Factor with ISTDs

Signal 1: DAD1 A, Sig=254,4 Ref=off

| Peak # | RetTime [min] | Type | Width [min] | Area [mAU*s] | Height [mAU] | Area %  |
|--------|---------------|------|-------------|--------------|--------------|---------|
| 1      | 14.135        | BB   | 0.3632      | 109.13181    | 4.69502      | 1.6720  |
| 2      | 18.574        | BB   | 0.4945      | 6417.94238   | 198.88658    | 98.3280 |

Totals : 6527.07420 203.58161

Data File D:\DATA\JIAOBING\DATA\MJM-2-40\ZJ-2021-12-04 2021-12-06 10-00-12\050-1701.D  
Sample Name: MJM-40-13-RAC

=====  
Acq. Operator : Seq. Line : 17  
Acq. Instrument : Instrument 2 Location : Vial 50  
Injection Date : 12/6/2021 9:37:41 PM Inj : 1  
Inj Volume : 3.000 µl  
Acq. Method : D:\DATA\JIAOBING\DATA\MJM-2-40\ZJ-2021-12-04 2021-12-06 10-00-12\DAD-OD(1-6  
) -90-10-1.0ML-3UL-220NM-40MIN.M  
Last changed : 12/4/2021 11:30:53 AM  
Analysis Method : D:\METHOD\ZXH\DAD-OD(1-6)-80-20-1.0ML-3UL-220NM-60MIN.M  
Last changed : 12/7/2021 9:35:16 AM  
(modified after loading)  
Additional Info : Peak(s) manually integrated

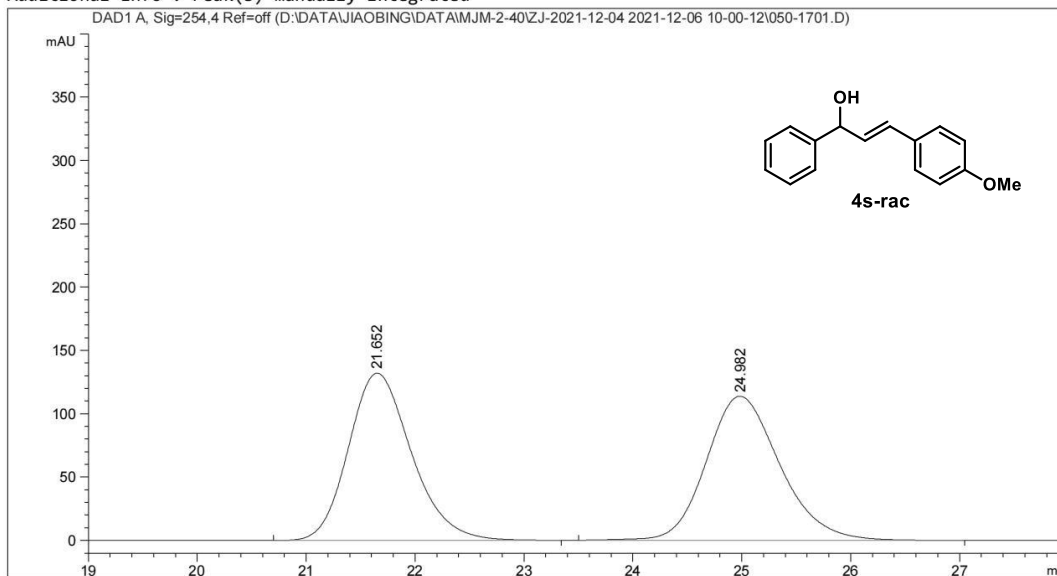

=====  
Area Percent Report  
=====

Sorted By : Signal  
Multiplier : 1.0000  
Dilution : 1.0000  
Use Multiplier & Dilution Factor with ISTDs

Signal 1: DAD1 A, Sig=254,4 Ref=off

| Peak # | RetTime [min] | Type | Width [min] | Area [mAU*s] | Height [mAU] | Area %  |
|--------|---------------|------|-------------|--------------|--------------|---------|
| 1      | 21.652        | BB   | 0.6170      | 5307.06299   | 132.01846    | 49.8265 |
| 2      | 24.982        | BB   | 0.7182      | 5344.01758   | 113.72173    | 50.1735 |

Totals : 1.06511e4 245.74019

Data File D:\DATA\JIAOBING\DATA\MJM-2-40\ZJ-2021-12-04 2021-12-04 13-33-53\042-1501.D  
Sample Name: MJM-40-13

=====  
Acq. Operator : Seq. Line : 15  
Acq. Instrument : Instrument 2 Location : Vial 42  
Injection Date : 12/4/2021 10:09:17 PM Inj : 1  
Inj Volume : 3.000 µl  
Acq. Method : D:\DATA\JIAOBING\DATA\MJM-2-40\ZJ-2021-12-04 2021-12-04 13-33-53\DAD-OD(1-6  
) -90-10-1.0ML-3UL-220NM-40MIN.M  
Last changed : 12/4/2021 11:30:53 AM  
Analysis Method : D:\METHOD\ZXH\DAD-OD(1-6)-80-20-1.0ML-3UL-220NM-60MIN.M  
Last changed : 12/7/2021 9:10:35 AM  
(modified after loading)  
Additional Info : Peak(s) manually integrated

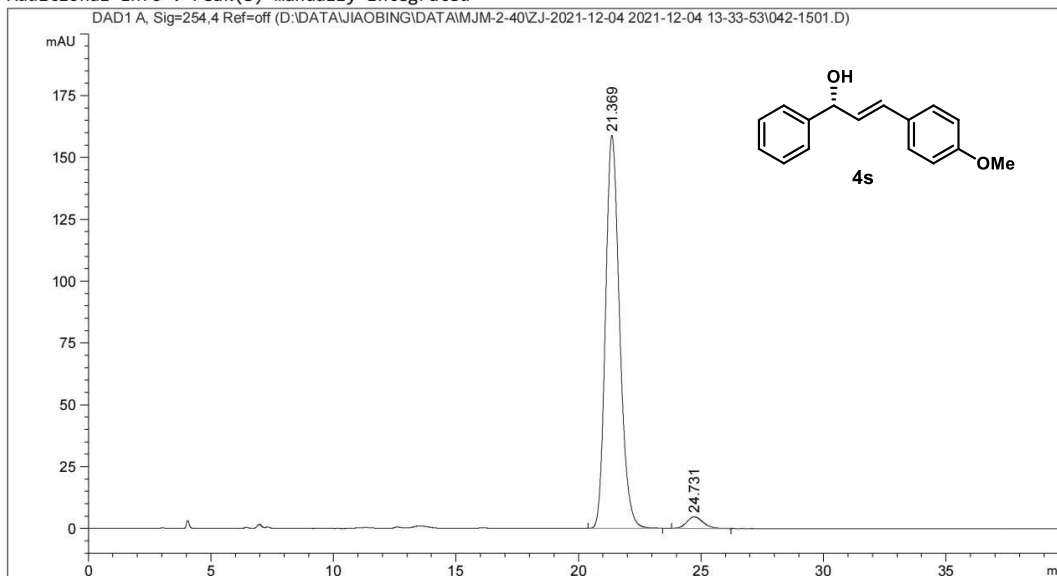

=====  
Area Percent Report  
=====

Sorted By : Signal  
Multiplier : 1.0000  
Dilution : 1.0000  
Use Multiplier & Dilution Factor with ISTDs

Signal 1: DAD1 A, Sig=254,4 Ref=off

| Peak # | RetTime [min] | Type | Width [min] | Area [mAU*s] | Height [mAU] | Area %  |
|--------|---------------|------|-------------|--------------|--------------|---------|
| 1      | 21.369        | BB   | 0.6161      | 6350.30664   | 158.95970    | 96.7048 |
| 2      | 24.731        | BB   | 0.5508      | 216.38510    | 4.70247      | 3.2952  |

Totals : 6566.69174 163.66218



=====  
Acq. Operator : Seq. Line : 24  
Acq. Instrument : Instrument 2 Location : Vial 48  
Injection Date : 7/2/2021 12:29:06 AM Inj : 1  
Inj Volume : 3.000 µl  
Acq. Method : D:\DATA\MYC\MYC-92-RAC\MYC-92-6-RAC 2021-07-01 10-21-10\DAD-OD(1-2)-90-10-1  
.0ML-3UL-220NM-40MIN.M  
Last changed : 4/24/2021 11:29:01 AM  
Analysis Method : D:\METHOD\ZXH\DAD-OD(1-2)-92-8-0.5ML-3UL-220NM-40MIN.M  
Last changed : 7/2/2021 11:02:44 AM  
(modified after loading)

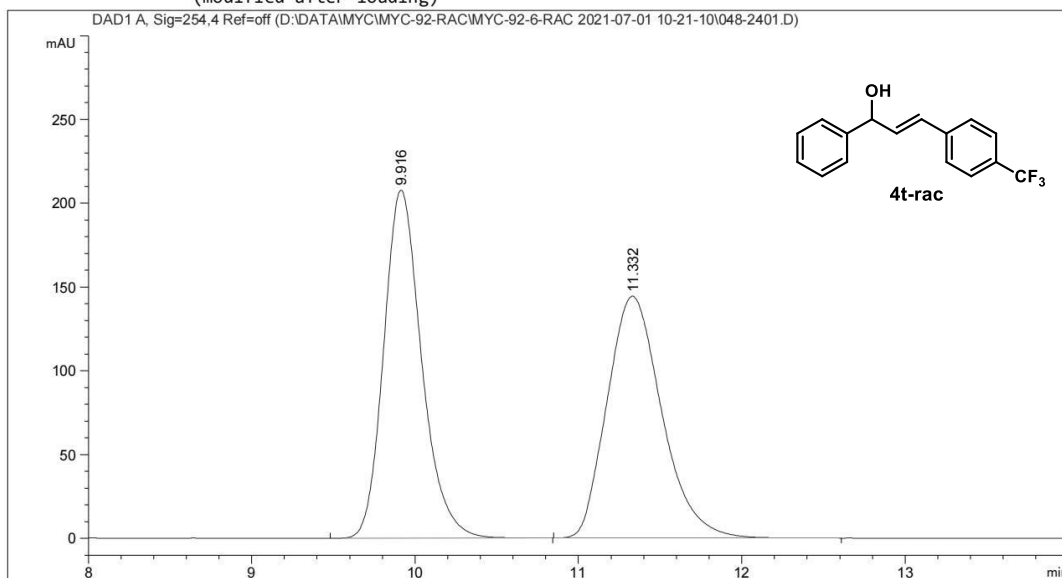

=====  
Area Percent Report  
=====

Sorted By : Signal  
Multiplier : 1.0000  
Dilution : 1.0000  
Use Multiplier & Dilution Factor with ISTDs

Signal 1: DAD1 A, Sig=254,4 Ref=off

| Peak # | RetTime [min] | Type | Width [min] | Area [mAU*s] | Height [mAU] | Area %  |
|--------|---------------|------|-------------|--------------|--------------|---------|
| 1      | 9.916         | BB   | 0.2459      | 3347.41919   | 207.87682    | 49.9667 |
| 2      | 11.332        | BB   | 0.3549      | 3351.88379   | 144.36092    | 50.0333 |

Totals : 6699.30298 352.23773

```

=====
Acq. Operator   :                               Seq. Line :   23
Acq. Instrument : Instrument 2                   Location  : Vial 47
Injection Date  : 7/1/2021 11:48:07 PM         Inj       :    1
                                                    Inj Volume: 3.000 µl

Acq. Method    : D:\DATA\MYC\MYC-92-RAC\MYC-92-6-RAC 2021-07-01 10-21-10\DAD-OD(1-2)-90-10-1
                : .0ML-3UL-220NM-40MIN.M
Last changed   : 4/24/2021 11:29:01 AM
Analysis Method : D:\METHOD\ZXH\DAD-OD(1-2)-92-8-0.5ML-3UL-220NM-40MIN.M
Last changed   : 7/2/2021 11:05:52 AM
                : (modified after loading)
Additional Info : Peak(s) manually integrated
  
```

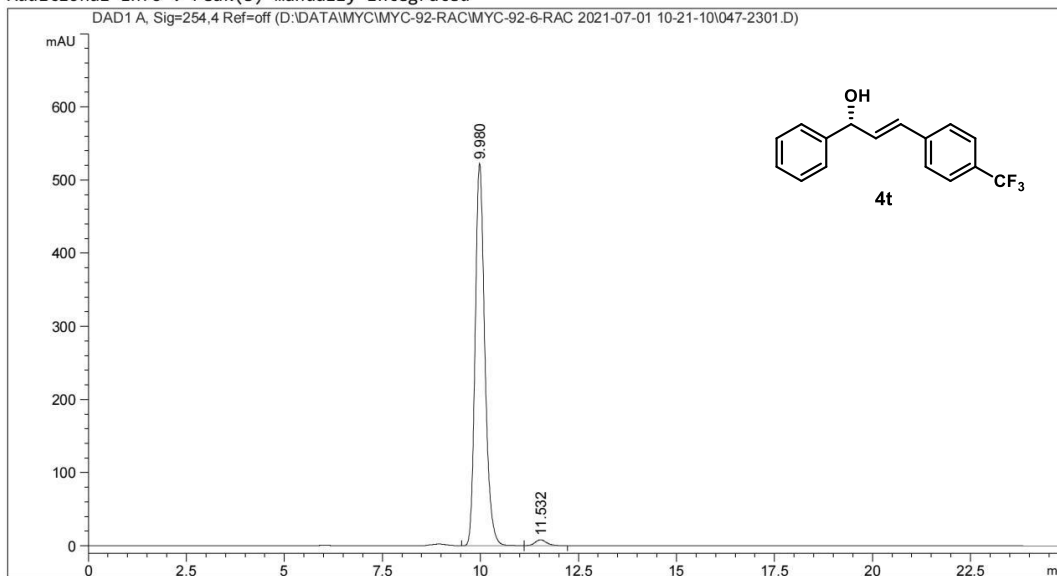

Area Percent Report

```

Sorted By      :      Signal
Multiplier     :      1.0000
Dilution      :      1.0000
Use Multiplier & Dilution Factor with ISTDs
  
```

Signal 1: DAD1 A, Sig=254,4 Ref=off

| Peak # | RetTime [min] | Type | Width [min] | Area [mAU*s] | Height [mAU] | Area %  |
|--------|---------------|------|-------------|--------------|--------------|---------|
| 1      | 9.980         | BB   | 0.2641      | 8962.30859   | 522.51434    | 98.2225 |
| 2      | 11.532        | BB   | 0.3080      | 162.18472    | 7.95159      | 1.7775  |

Totals :                            9124.49332   530.46593

Data File D:\DATA\JIAOBING\DATA\MJM-2-40\ZJ-2021-12-04 2021-12-06 10-00-12\049-1601.D  
Sample Name: MJM-40-12-RAC

=====  
Acq. Operator : Seq. Line : 16  
Acq. Instrument : Instrument 2 Location : Vial 49  
Injection Date : 12/6/2021 8:56:39 PM Inj : 1  
Inj Volume : 3.000 µl  
Acq. Method : D:\DATA\JIAOBING\DATA\MJM-2-40\ZJ-2021-12-04 2021-12-06 10-00-12\DAD-OD(1-6  
) -90-10-1.0ML-3UL-220NM-40MIN.M  
Last changed : 12/4/2021 11:30:53 AM  
Analysis Method : D:\METHOD\ZXH\DAD-OD(1-6)-80-20-1.0ML-3UL-220NM-60MIN.M  
Last changed : 12/7/2021 9:34:13 AM  
(modified after loading)  
Additional Info : Peak(s) manually integrated

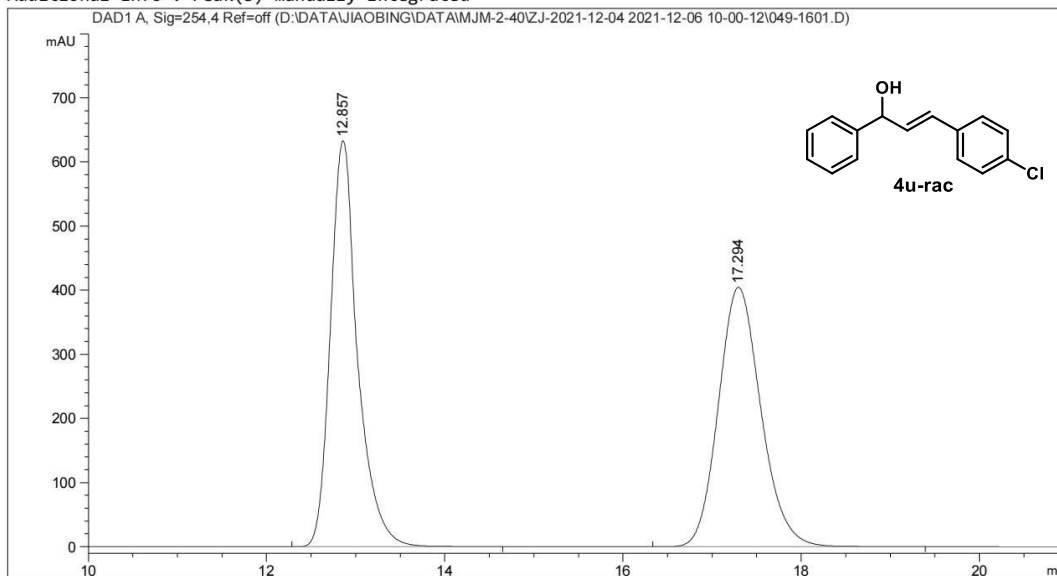

=====  
Area Percent Report  
=====

Sorted By : Signal  
Multiplier : 1.0000  
Dilution : 1.0000  
Use Multiplier & Dilution Factor with ISTDs

Signal 1: DAD1 A, Sig=254,4 Ref=off

| Peak # | RetTime [min] | Type | Width [min] | Area [mAU*s] | Height [mAU] | Area %  |
|--------|---------------|------|-------------|--------------|--------------|---------|
| 1      | 12.857        | BB   | 0.3145      | 1.33760e4    | 633.20538    | 49.9610 |
| 2      | 17.294        | BB   | 0.5103      | 1.33969e4    | 404.56702    | 50.0390 |

Totals : 2.67729e4 1037.77240

Data File D:\DATA\JIAOBING\DATA\MJM-2-40\ZJ-2021-12-04 2021-12-04 13-33-53\041-1401.D  
Sample Name: MJM-40-12

=====  
Acq. Operator : Seq. Line : 14  
Acq. Instrument : Instrument 2 Location : Vial 41  
Injection Date : 12/4/2021 9:28:20 PM Inj : 1  
Inj Volume : 3.000 µl  
Acq. Method : D:\DATA\JIAOBING\DATA\MJM-2-40\ZJ-2021-12-04 2021-12-04 13-33-53\DAD-OD(1-6  
) -90-10-1.0ML-3UL-220NM-40MIN.M  
Last changed : 12/4/2021 11:30:53 AM  
Analysis Method : D:\METHOD\ZXH\DAD-OD(1-6)-80-20-1.0ML-3UL-220NM-60MIN.M  
Last changed : 12/7/2021 9:09:07 AM  
(modified after loading)  
Additional Info : Peak(s) manually integrated

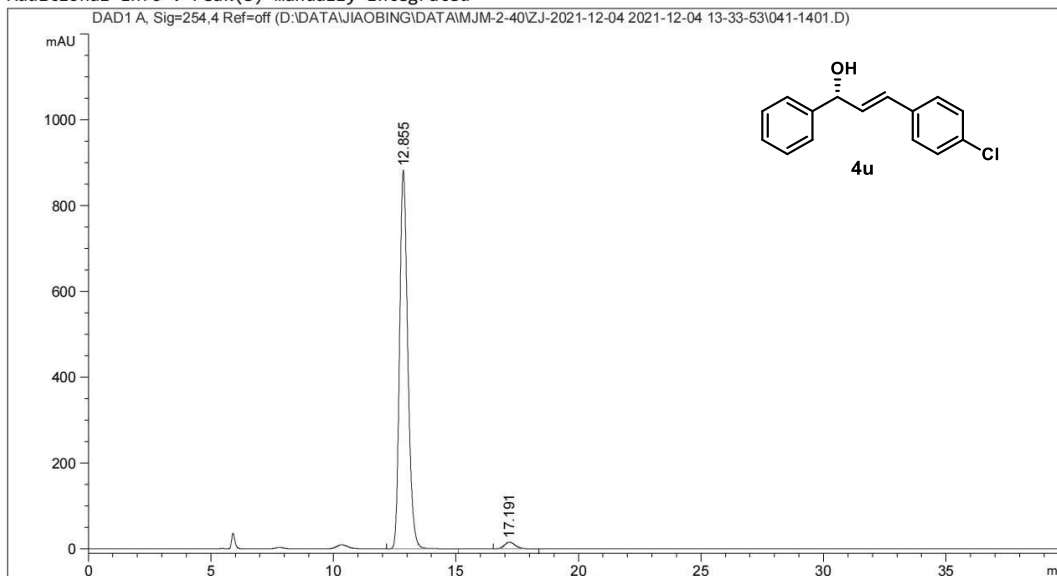

=====  
Area Percent Report  
=====

Sorted By : Signal  
Multiplier : 1.0000  
Dilution : 1.0000  
Use Multiplier & Dilution Factor with ISTDs

Signal 1: DAD1 A, Sig=254,4 Ref=off

| Peak # | RetTime [min] | Type | Width [min] | Area [mAU*s] | Height [mAU] | Area %  |
|--------|---------------|------|-------------|--------------|--------------|---------|
| 1      | 12.855        | BB   | 0.3578      | 2.05308e4    | 881.40686    | 97.7369 |
| 2      | 17.191        | BB   | 0.4584      | 475.38721    | 15.55974     | 2.2631  |

Totals : 2.10062e4 896.96660

```
=====
Acq. Operator   :                               Seq. Line :    8
Acq. Instrument : Instrument 2                   Location  : Vial 36
Injection Date  : 7/3/2021 7:33:12 PM           Inj       :    1
                                                    Inj Volume: 3.000 µl

Acq. Method     : D:\DATA\ZXH\MJM-20210702\MYC-92-6-RAC 2021-07-03 15-45-16\DAD-OD(1-2)-90-10
                  -1.0ML-3UL-220NM-40MIN.M
Last changed    : 4/24/2021 11:29:01 AM
Analysis Method : D:\METHOD\MYC\DAD-OJ(1-6)-80-20-0.3ML-5UL-ALL-90MIN.M
Last changed    : 7/5/2021 4:13:40 PM
                  (modified after loading)
Additional Info : Peak(s) manually integrated
=====
```

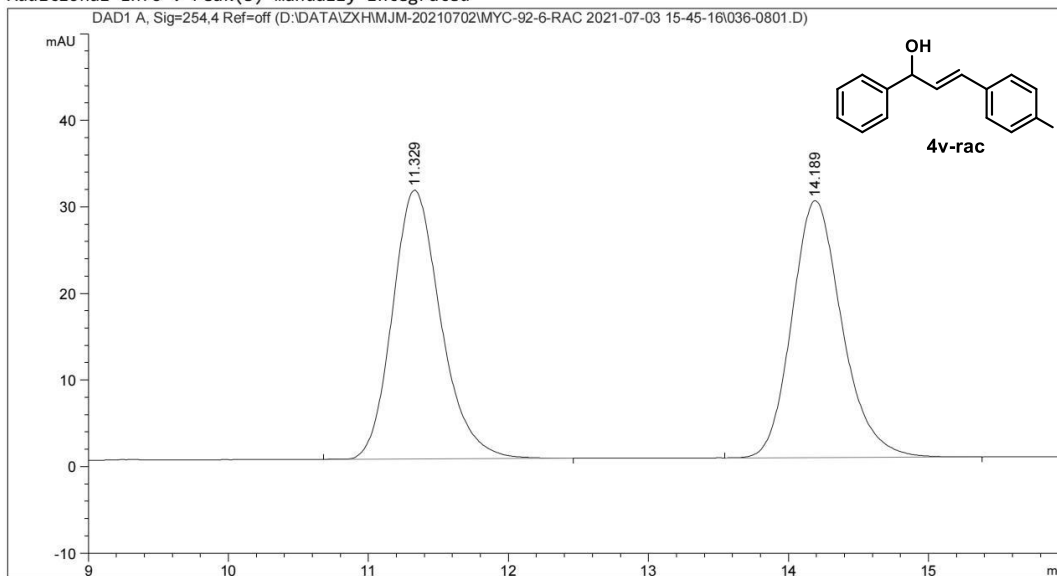

Area Percent Report

```
=====
Sorted By      :      Signal
Multiplier     :      1.0000
Dilution       :      1.0000
Use Multiplier & Dilution Factor with ISTDs
=====
```

Signal 1: DAD1 A, Sig=254,4 Ref=off

| Peak # | RetTime [min] | Type | Width [min] | Area [mAU*s] | Height [mAU] | Area %  |
|--------|---------------|------|-------------|--------------|--------------|---------|
| 1      | 11.329        | BB   | 0.3684      | 746.20404    | 31.05257     | 50.2296 |
| 2      | 14.189        | BB   | 0.3825      | 739.38275    | 29.69274     | 49.7704 |

Totals :                    1485.58679    60.74531

=====  
Acq. Operator : Seq. Line : 3  
Acq. Instrument : Instrument 2 Location : Vial 31  
Injection Date : 7/5/2021 3:20:01 PM Inj : 1  
Inj Volume : 3.000 µl  
Acq. Method : D:\DATA\ZXH\MJM-20210702\MYC-92-6-RAC 2021-07-05 14-53-14\DAD-OD(1-2)-90-10  
-1.0ML-3UL-220NM-40MIN.M  
Last changed : 4/24/2021 11:29:01 AM  
Analysis Method : D:\METHOD\MYC\DAD-OJ(1-6)-80-20-0.3ML-5UL-ALL-90MIN.M  
Last changed : 7/5/2021 4:11:15 PM  
(modified after loading)  
Additional Info : Peak(s) manually integrated

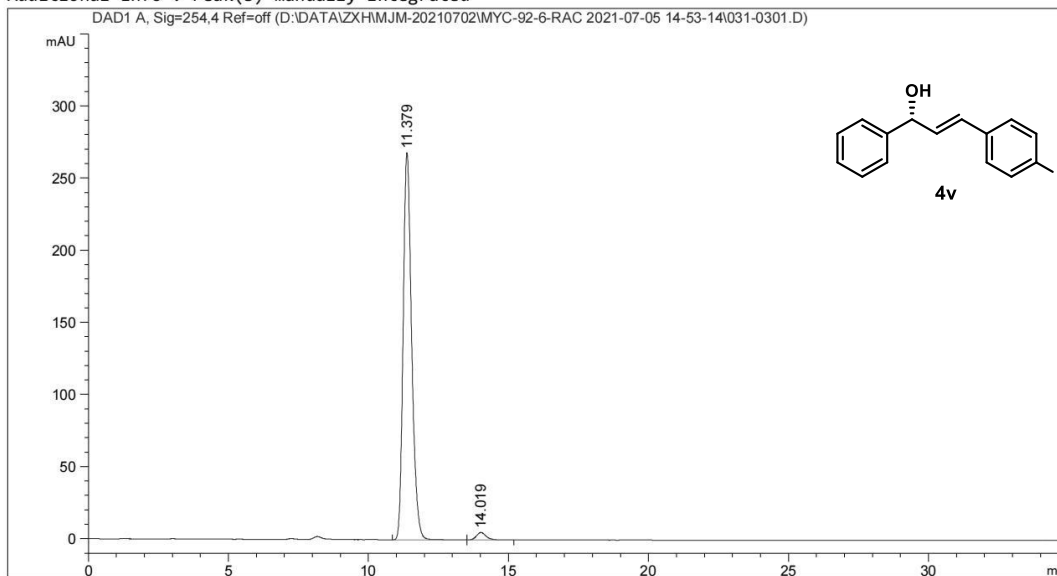

=====  
Area Percent Report  
=====

Sorted By : Signal  
Multiplier : 1.0000  
Dilution : 1.0000  
Use Multiplier & Dilution Factor with ISTDs

Signal 1: DAD1 A, Sig=254,4 Ref=off

| Peak # | RetTime [min] | Type | Width [min] | Area [mAU*s] | Height [mAU] | Area %  |
|--------|---------------|------|-------------|--------------|--------------|---------|
| 1      | 11.379        | BV   | 0.3223      | 5663.76660   | 268.27240    | 97.8578 |
| 2      | 14.019        | VB   | 0.3598      | 123.98618    | 5.16986      | 2.1422  |

Totals : 5787.75278 273.44226

Data File D:\DATA\JIAOBING\DATA\MJM-2-40\ZJ-2021-12-04 2021-12-07 08-56-53\087-0801.D  
Sample Name: MJM-40-21-RAC

=====  
Acq. Operator : Seq. Line : 8  
Acq. Instrument : Instrument 2 Location : Vial 87  
Injection Date : 12/7/2021 1:15:26 PM Inj : 1  
Inj Volume : 3.000 µl  
Acq. Method : D:\DATA\JIAOBING\DATA\MJM-2-40\ZJ-2021-12-04 2021-12-07 08-56-53\DAD-OD(1-6  
) -90-10-1.0ML-3UL-220NM-40MIN.M  
Last changed : 12/4/2021 11:30:53 AM  
Analysis Method : D:\METHOD\MYC\DAD-AD(1-2)-80-20-1.0ML-5UL-ALL-10MIN.M  
Last changed : 12/8/2021 9:23:05 AM  
(modified after loading)  
Additional Info : Peak(s) manually integrated

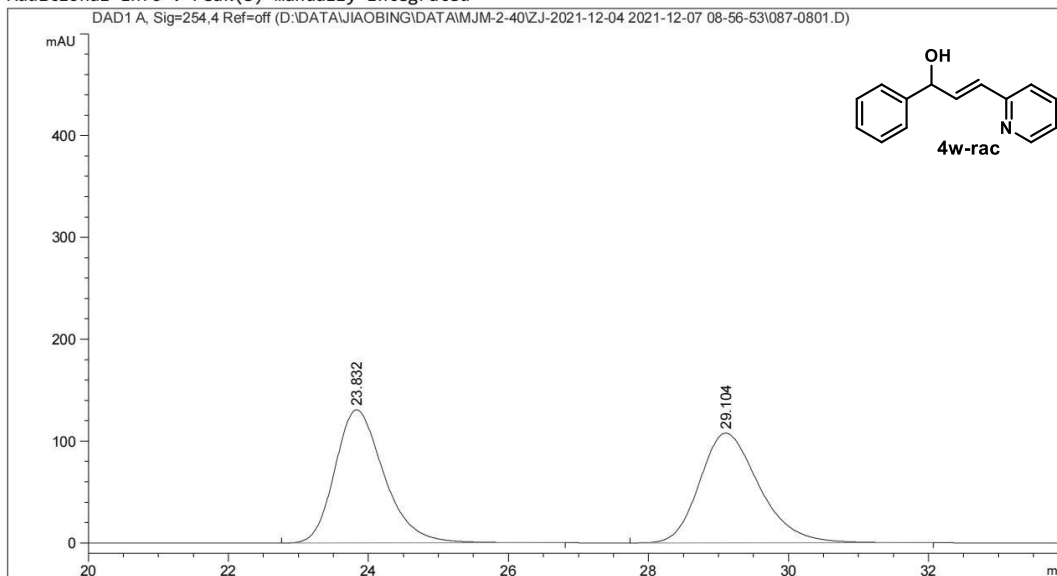

=====  
Area Percent Report  
=====

Sorted By : Signal  
Multiplier : 1.0000  
Dilution : 1.0000  
Use Multiplier & Dilution Factor with ISTDs

Signal 1: DAD1 A, Sig=254,4 Ref=off

| Peak # | RetTime [min] | Type | Width [min] | Area [mAU*s] | Height [mAU] | Area %  |
|--------|---------------|------|-------------|--------------|--------------|---------|
| 1      | 23.832        | BB   | 0.7441      | 6387.95801   | 130.71585    | 50.0469 |
| 2      | 29.104        | BB   | 0.9027      | 6375.98438   | 107.69790    | 49.9531 |

Totals : 1.27639e4 238.41375

```

=====
Acq. Operator   :                               Seq. Line :    9
Acq. Instrument : Instrument 2                   Location  : Vial 5
Injection Date  : 12/7/2021 1:56:28 PM          Inj       :    1
                                                    Inj Volume: 3.000 µl

Acq. Method     : D:\DATA\JIAOBING\DATA\MJM-2-40\ZJ-2021-12-04 2021-12-07 08-56-53\DAD-OD(1-6
                  )-90-10-1.0ML-3UL-220NM-40MIN.M
Last changed    : 12/4/2021 11:30:53 AM
Analysis Method : D:\METHOD\MYC\DAD-AD(1-2)-80-20-1.0ML-5UL-ALL-10MIN.M
Last changed    : 12/8/2021 9:20:54 AM
                  (modified after loading)
Additional Info  : Peak(s) manually integrated
  
```

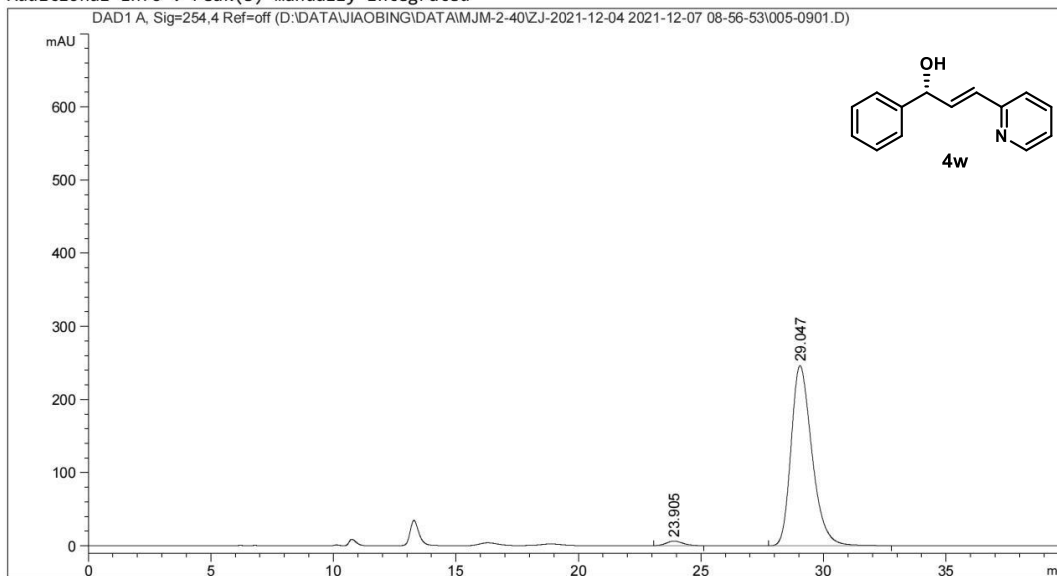

Area Percent Report

```

Sorted By      :      Signal
Multiplier     :      1.0000
Dilution       :      1.0000
Use Multiplier & Dilution Factor with ISTDs
  
```

Signal 1: DAD1 A, Sig=254,4 Ref=off

| Peak # | RetTime [min] | Type | Width [min] | Area [mAU*s] | Height [mAU] | Area %  |
|--------|---------------|------|-------------|--------------|--------------|---------|
| 1      | 23.905        | BB   | 0.5914      | 284.25131    | 6.17075      | 1.9099  |
| 2      | 29.047        | BB   | 0.9111      | 1.45990e4    | 246.43993    | 98.0901 |

Totals :                    1.48833e4    252.61068



Data File D:\DATA\JIAOBING\DATA\MJM-2-40\ZJ-2021-12-04 2021-12-06 10-00-12\041-0701.D  
 Sample Name: MJM-40-1-RAC

```

=====
Acq. Operator   :                               Seq. Line :    7
Acq. Instrument : Instrument 2                   Location  : Vial 41
Injection Date  : 12/6/2021 1:07:43 PM         Inj       :    1
                                                    Inj Volume: 3.000 µl

Acq. Method     : D:\DATA\JIAOBING\DATA\MJM-2-40\ZJ-2021-12-04 2021-12-06 10-00-12\DAD-OD(1-6
                )-90-10-1.0ML-3UL-220NM-40MIN.M
Last changed    : 12/4/2021 11:30:53 AM
Analysis Method : D:\METHOD\ZXH\DAD-OD(1-6)-80-20-1.0ML-3UL-220NM-60MIN.M
Last changed    : 12/7/2021 9:25:44 AM
                (modified after loading)
Additional Info : Peak(s) manually integrated
  
```

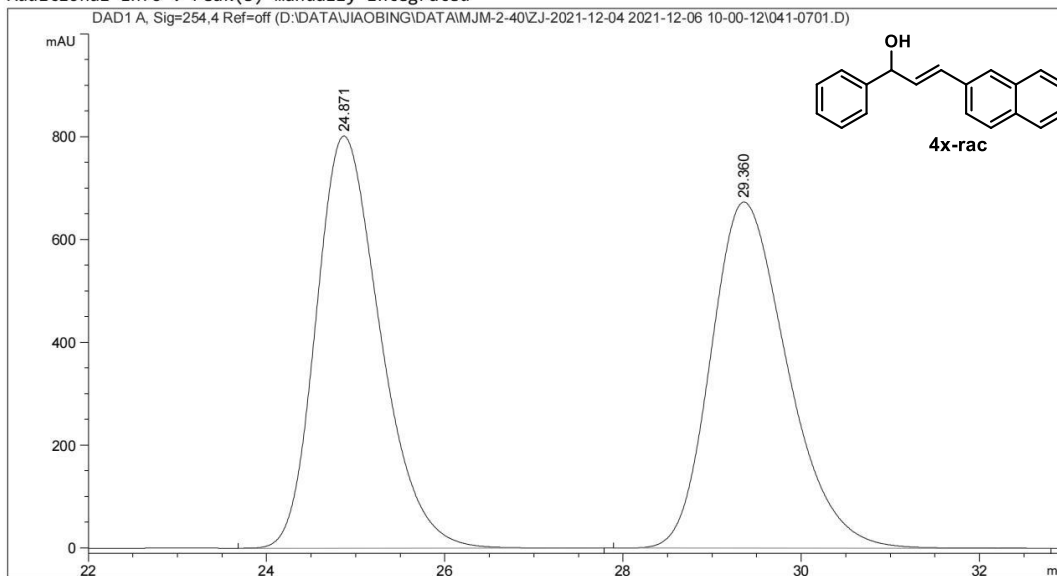

Area Percent Report

```

=====
Sorted By      :      Signal
Multiplier     :      1.0000
Dilution       :      1.0000
Use Multiplier & Dilution Factor with ISTDs
  
```

Signal 1: DAD1 A, Sig=254,4 Ref=off

| Peak # | RetTime [min] | Type | Width [min] | Area [mAU*s] | Height [mAU] | Area %  |
|--------|---------------|------|-------------|--------------|--------------|---------|
| 1      | 24.871        | BB   | 0.7710      | 4.00538e4    | 801.49219    | 49.9801 |
| 2      | 29.360        | BB   | 0.9168      | 4.00857e4    | 673.06232    | 50.0199 |

Totals :                            8.01395e4  1474.55450

=====  
Acq. Operator : Seq. Line : 3  
Acq. Instrument : Instrument 2 Location : Vial 11  
Injection Date : 12/4/2021 1:57:39 PM Inj : 1  
Inj Volume : 3.000 µl  
Acq. Method : D:\DATA\JIAOBING\DATA\MJM-2-40\ZJ-2021-12-04 2021-12-04 13-33-53\DAD-OD(1-6  
) -90-10-1.0ML-3UL-220NM-40MIN.M  
Last changed : 12/4/2021 11:30:53 AM  
Analysis Method : D:\METHOD\ZXH\DAD-OD(1-6)-90-10-1.0ML-3UL-220NM-90MIN.M  
Last changed : 12/6/2021 3:07:47 PM  
(modified after loading)  
Additional Info : Peak(s) manually integrated

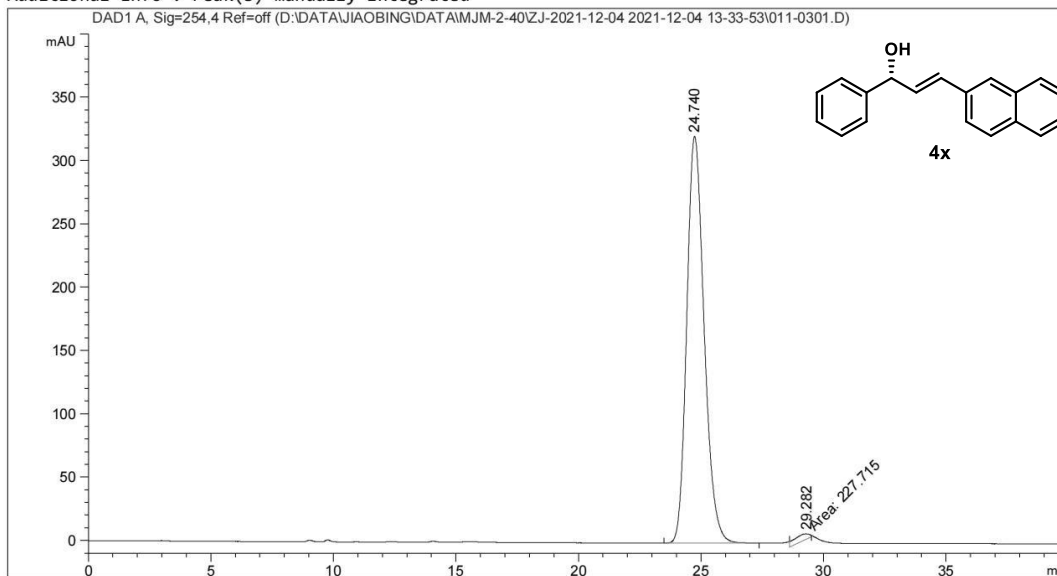

=====  
Area Percent Report  
=====

Sorted By : Signal  
Multiplier : 1.0000  
Dilution : 1.0000  
Use Multiplier & Dilution Factor with ISTDs

Signal 1: DAD1 A, Sig=254,4 Ref=off

| Peak # | RetTime [min] | Type | Width [min] | Area [mAU*s] | Height [mAU] | Area %  |
|--------|---------------|------|-------------|--------------|--------------|---------|
| 1      | 24.740        | BB   | 0.7607      | 1.58156e4    | 321.08249    | 98.5806 |
| 2      | 29.282        | MM   | 0.6575      | 227.71501    | 4.45119      | 1.4194  |

Totals : 1.60433e4 325.53368

Data File D:\DATA\MYC\MYC-131\MYC-131 2021-07-24 08-29-38\031-1001.D  
Sample Name: MJM-20-RAC

=====  
Acq. Operator : Seq. Line : 10  
Acq. Instrument : Instrument 2 Location : Vial 31  
Injection Date : 7/24/2021 2:15:51 PM Inj : 1  
Inj Volume : 3.000 µl  
Acq. Method : D:\DATA\MYC\MYC-131\MYC-131 2021-07-24 08-29-38\DAD-OD(1-2)-90-10-1.0ML-3UL  
-220NM-40MIN.M  
Last changed : 4/24/2021 11:29:01 AM  
Analysis Method : D:\METHOD\ZXH\DAD-OD(1-2)-90-10-1.0ML-3UL-220NM-80MIN.M  
Last changed : 7/26/2021 11:02:22 AM  
(modified after loading)  
Additional Info : Peak(s) manually integrated

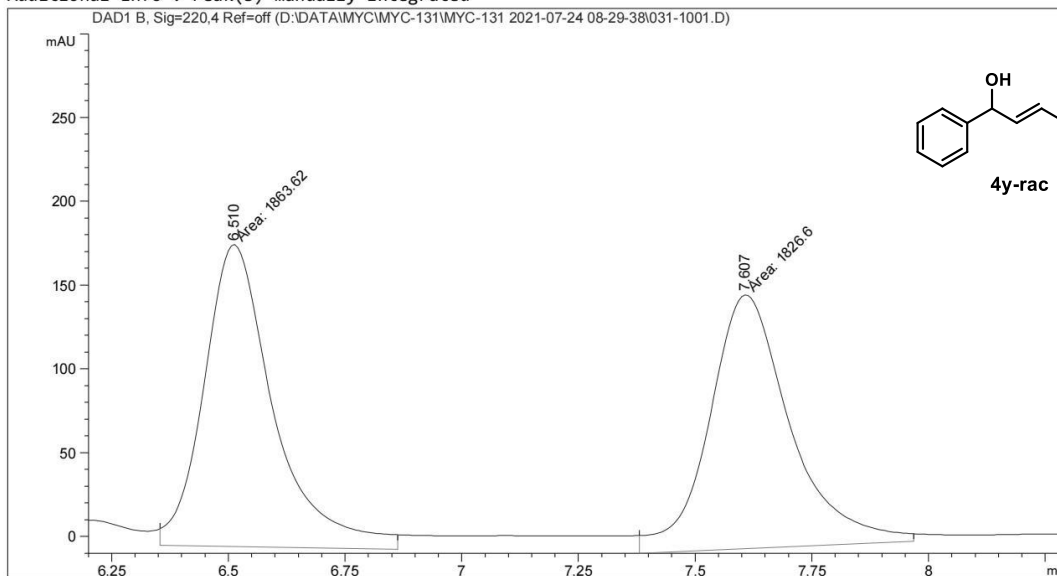

=====  
Area Percent Report  
=====

Sorted By : Signal  
Multiplier : 1.0000  
Dilution : 1.0000  
Use Multiplier & Dilution Factor with ISTDs

Signal 1: DAD1 B, Sig=220,4 Ref=off

| Peak # | RetTime [min] | Type | Width [min] | Area [mAU*s] | Height [mAU] | Area %  |
|--------|---------------|------|-------------|--------------|--------------|---------|
| 1      | 6.510         | MM   | 0.1723      | 1863.61768   | 180.22163    | 50.5016 |
| 2      | 7.607         | MM   | 0.2009      | 1826.59924   | 151.56111    | 49.4984 |

Totals : 3690.21692 331.78275

Data File D:\DATA\ZXH\MJM-20210702\MYC-92-6-RAC 2021-07-04 20-03-51\051-0601.D  
Sample Name: MJM-20

=====  
Acq. Operator : Seq. Line : 6  
Acq. Instrument : Instrument 2 Location : Vial 51  
Injection Date : 7/4/2021 10:29:56 PM Inj : 1  
Inj Volume : 3.000 µl  
Acq. Method : D:\DATA\ZXH\MJM-20210702\MYC-92-6-RAC 2021-07-04 20-03-51\DAD-OD(1-2)-90-10  
-1.0ML-3UL-220NM-40MIN.M  
Last changed : 4/24/2021 11:29:01 AM  
Analysis Method : D:\METHOD\ZXH\DAD-OD(1-2)-90-10-1.0ML-3UL-220NM-80MIN.M  
Last changed : 7/26/2021 10:52:37 AM  
(modified after loading)  
Additional Info : Peak(s) manually integrated

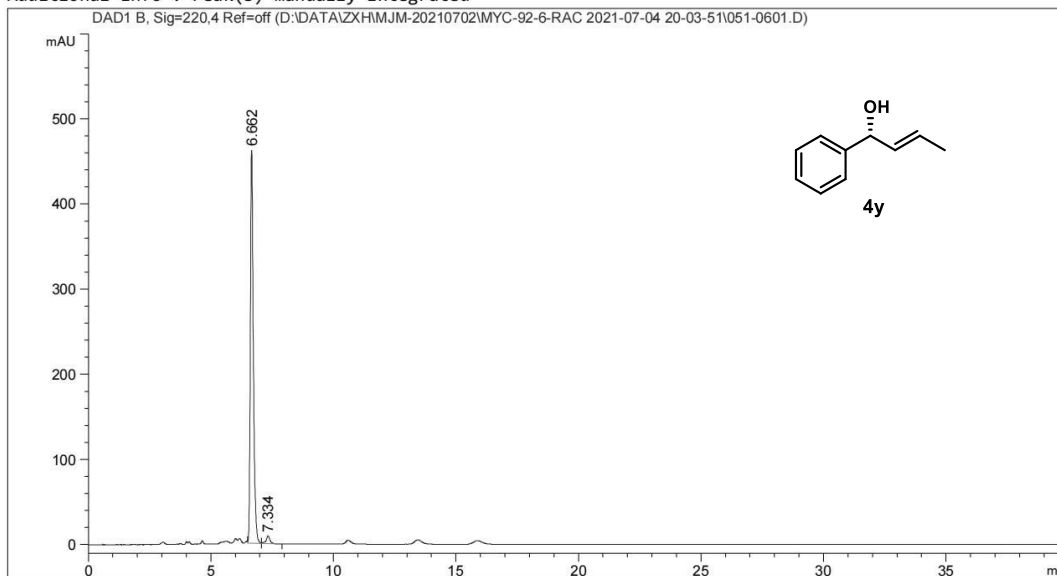

=====  
Area Percent Report  
=====

Sorted By : Signal  
Multiplier : 1.0000  
Dilution : 1.0000  
Use Multiplier & Dilution Factor with ISTDs

Signal 1: DAD1 B, Sig=220,4 Ref=off

| Peak # | RetTime [min] | Type | Width [min] | Area [mAU*s] | Height [mAU] | Area %  |
|--------|---------------|------|-------------|--------------|--------------|---------|
| 1      | 6.662         | VV   | 0.1266      | 3908.25781   | 462.37070    | 97.4786 |
| 2      | 7.334         | VB   | 0.1582      | 101.09191    | 9.19882      | 2.5214  |

Totals : 4009.34972 471.56952

Data File D:\DATA\JIAOBING\DATA\MJM-2-52-53\TJY-2-225 2021-12-16 16-50-12\012-0401.D  
 Sample Name: mjm-47-1-rac

```

=====
Acq. Operator   :                               Seq. Line :    4
Acq. Instrument : Instrument 2                   Location  : Vial 12
Injection Date  : 12/16/2021 5:55:00 PM        Inj       :    1
                                           Inj Volume: 3.000 µl

Acq. Method     : D:\DATA\JIAOBING\DATA\MJM-2-52-53\TJY-2-225 2021-12-16 16-50-12\DAD-OD(1-6)
                  -90-10-1.0ML-3UL-220NM-40MIN.M
Last changed    : 12/4/2021 11:30:53 AM
Analysis Method : D:\METHOD\TJY\DAD-OD(1-6)-80-20-1ML-5UL-ALL-10MIN.M
Last changed    : 12/17/2021 8:59:40 AM
                  (modified after loading)
Additional Info  : Peak(s) manually integrated
  
```

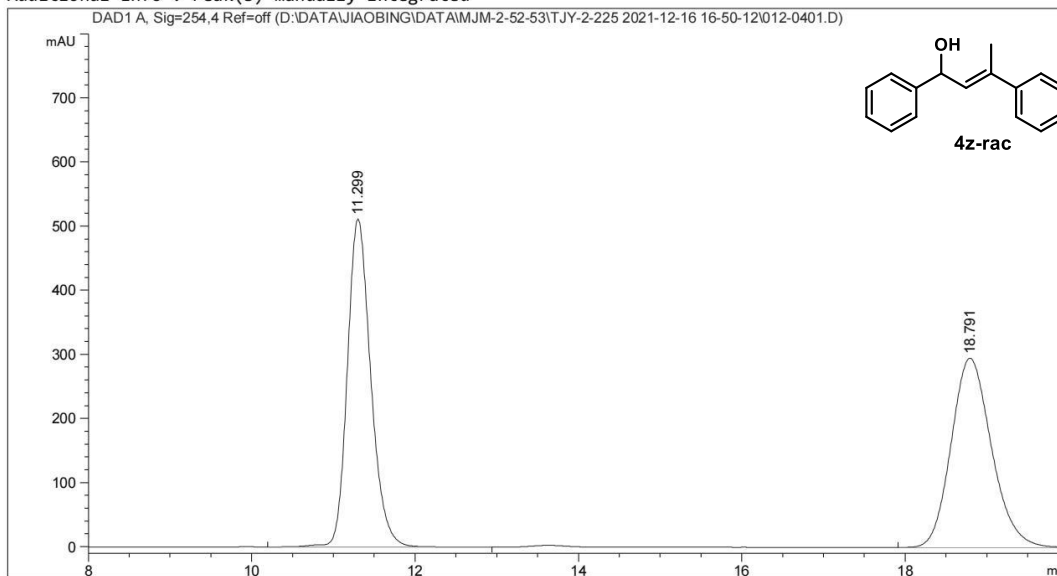

Area Percent Report

```

Sorted By      : Signal
Multiplier     : 1.0000
Dilution       : 1.0000
Use Multiplier & Dilution Factor with ISTDs
  
```

Signal 1: DAD1 A, Sig=254,4 Ref=off

| Peak # | RetTime [min] | Type | Width [min] | Area [mAU*s] | Height [mAU] | Area %  |
|--------|---------------|------|-------------|--------------|--------------|---------|
| 1      | 11.299        | BB   | 0.3067      | 1.01984e4    | 511.39557    | 50.1839 |
| 2      | 18.791        | BB   | 0.5282      | 1.01236e4    | 295.11301    | 49.8161 |

Totals :                                    2.03220e4    806.50858

Data File D:\DATA\JIAOBING\DATA\MJM-2-52-53\TJY-2-225 2021-12-16 16-50-12\011-0301.D  
Sample Name: mjm-47-1

```
=====
Acq. Operator   :                               Seq. Line :    3
Acq. Instrument : Instrument 2                   Location  : Vial 11
Injection Date  : 12/16/2021 5:14:01 PM         Inj       :    1
                                                    Inj Volume: 3.000 µl

Acq. Method     : D:\DATA\JIAOBING\DATA\MJM-2-52-53\TJY-2-225 2021-12-16 16-50-12\DAD-OD(1-6)
                  -90-10-1.0ML-3UL-220NM-40MIN.M
Last changed    : 12/4/2021 11:30:53 AM
Analysis Method : D:\METHOD\TJY\DAD-OD(1-6)-80-20-1ML-5UL-ALL-10MIN.M
Last changed    : 12/17/2021 8:57:45 AM
                  (modified after loading)
Additional Info  : Peak(s) manually integrated
=====
```

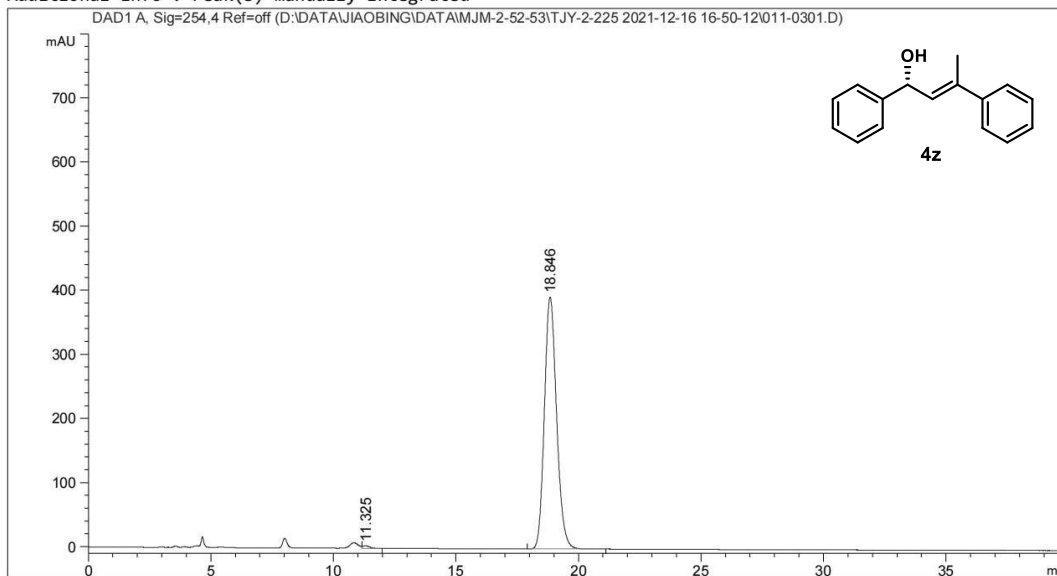

Area Percent Report

```
Sorted By      : Signal
Multiplier     : 1.0000
Dilution       : 1.0000
Use Multiplier & Dilution Factor with ISTDs
```

Signal 1: DAD1 A, Sig=254,4 Ref=off

| Peak # | RetTime [min] | Type | Width [min] | Area [mAU*s] | Height [mAU] | Area %  |
|--------|---------------|------|-------------|--------------|--------------|---------|
| 1      | 11.325        | VB   | 0.2879      | 79.00240     | 3.97460      | 0.5788  |
| 2      | 18.846        | BB   | 0.5329      | 1.35713e4    | 392.93716    | 99.4212 |

Totals : 1.36503e4 396.91176

=====  
Acq. Operator : Seq. Line : 11  
Acq. Instrument : Instrument 2 Location : Vial 53  
Injection Date : 1/5/2022 10:45:17 PM Inj : 1  
Inj Volume : 3.000 µl  
Acq. Method : D:\DATA\JIAOBING\DATA\MJM-2-69\MYC-305 2022-01-05 16-54-25\DAD-OD(1-6)-90-  
10-1.0ML-3UL-220NM-40MIN.M  
Last changed : 12/4/2021 11:30:53 AM  
Analysis Method : D:\METHOD\ZXH\DAD-OD(1-6)-80-20-0.5ML-3UL-220NM-10MIN.M  
Last changed : 1/7/2022 4:28:40 PM  
(modified after loading)  
Additional Info : Peak(s) manually integrated

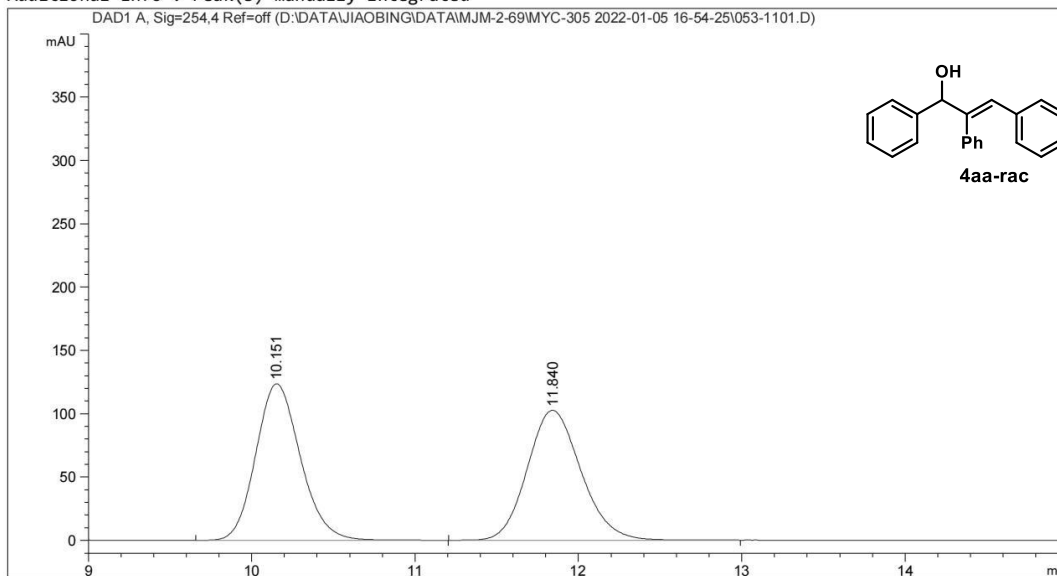

=====  
Area Percent Report  
=====

Sorted By : Signal  
Multiplier : 1.0000  
Dilution : 1.0000  
Use Multiplier & Dilution Factor with ISTDs

Signal 1: DAD1 A, Sig=254,4 Ref=off

| Peak # | RetTime [min] | Type | Width [min] | Area [mAU*s] | Height [mAU] | Area %  |
|--------|---------------|------|-------------|--------------|--------------|---------|
| 1      | 10.151        | BB   | 0.2931      | 2340.56372   | 123.48109    | 50.0377 |
| 2      | 11.840        | BB   | 0.3520      | 2337.03760   | 102.51072    | 49.9623 |

Totals : 4677.60132 225.99181

Data File D:\DATA\JIAOBING\DATA\MJM-2-70\MYC-304 2022-01-07 11-50-03\016-1301.D  
Sample Name: MJM-72-2

=====  
Acq. Operator : Seq. Line : 13  
Acq. Instrument : Instrument 2 Location : Vial 16  
Injection Date : 1/7/2022 3:58:51 PM Inj : 1  
Inj Volume : 3.000 µl  
Acq. Method : D:\DATA\JIAOBING\DATA\MJM-2-70\MYC-304 2022-01-07 11-50-03\DAD-OD(1-6)-90-  
10-1.0ML-3UL-220NM-25MIN.M  
Last changed : 12/14/2021 9:39:25 AM  
Analysis Method : D:\METHOD\ZXH\DAD-OD(1-6)-80-20-0.5ML-3UL-220NM-10MIN.M  
Last changed : 1/7/2022 4:26:47 PM  
(modified after loading)  
Additional Info : Peak(s) manually integrated

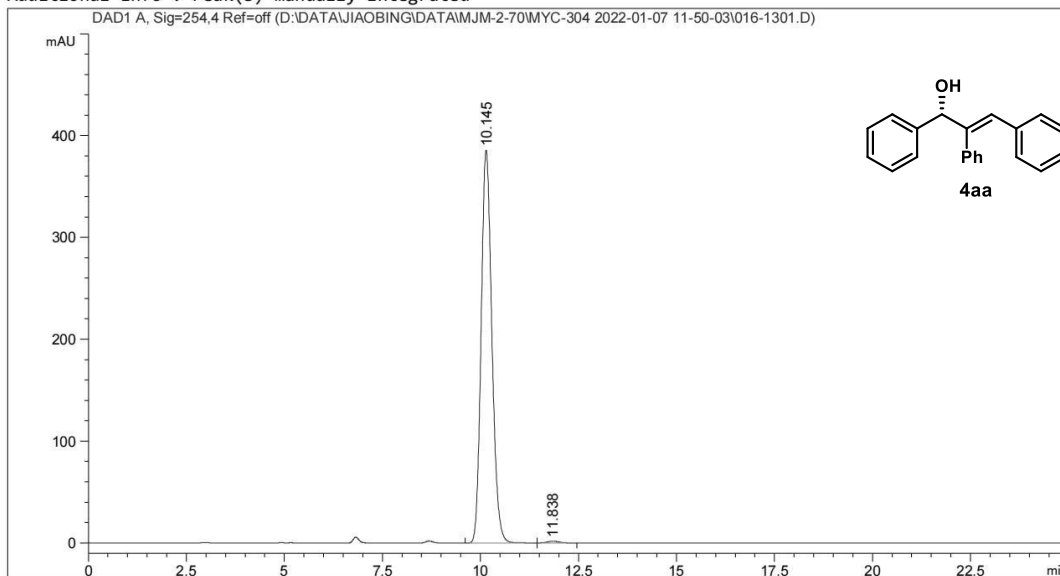

=====  
Area Percent Report  
=====

Sorted By : Signal  
Multiplier : 1.0000  
Dilution : 1.0000  
Use Multiplier & Dilution Factor with ISTDs

Signal 1: DAD1 A, Sig=254,4 Ref=off

| Peak # | RetTime [min] | Type | Width [min] | Area [mAU*s] | Height [mAU] | Area %  |
|--------|---------------|------|-------------|--------------|--------------|---------|
| 1      | 10.145        | BB   | 0.2936      | 7331.55469   | 385.96646    | 99.4805 |
| 2      | 11.838        | BB   | 0.2832      | 38.28793     | 1.71048      | 0.5195  |

Totals : 7369.84261 387.67694



Data File D:\DATA\JIAOBING\DATA\MJM-2-55\TJY-2-225 2021-12-25 14-59-36\021-0301.D  
Sample Name: mjm-55-2-RAC

=====  
Acq. Operator : Seq. Line : 3  
Acq. Instrument : Instrument 2 Location : Vial 21  
Injection Date : 12/25/2021 3:23:13 PM Inj : 1  
Inj Volume : 3.000 µl  
Acq. Method : D:\DATA\JIAOBING\DATA\MJM-2-55\TJY-2-225 2021-12-25 14-59-36\DAD-OD(1-6)-90  
-10-1.0ML-3UL-220NM-40MIN.M  
Last changed : 12/4/2021 11:30:53 AM  
Analysis Method : D:\METHOD\MYC\DAD-AD(1-2)-90-10-0.5ML-5UL-ALL-10MIN.M  
Last changed : 12/29/2021 12:45:40 PM  
(modified after loading)  
Additional Info : Peak(s) manually integrated

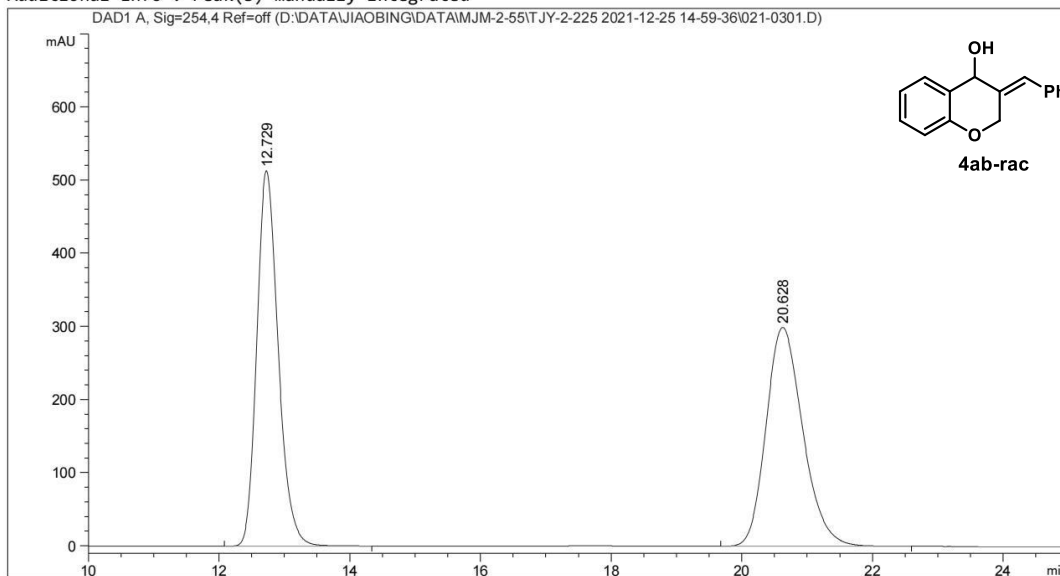

=====  
Area Percent Report  
=====

Sorted By : Signal  
Multiplier : 1.0000  
Dilution : 1.0000  
Use Multiplier & Dilution Factor with ISTDs

Signal 1: DAD1 A, Sig=254,4 Ref=off

| Peak # | RetTime [min] | Type | Width [min] | Area [mAU*s] | Height [mAU] | Area %  |
|--------|---------------|------|-------------|--------------|--------------|---------|
| 1      | 12.729        | BB   | 0.3493      | 1.16694e4    | 513.14795    | 49.9573 |
| 2      | 20.628        | BB   | 0.5999      | 1.16894e4    | 299.14352    | 50.0427 |

Totals : 2.33588e4 812.29147

Data File D:\DATA\JIAOBING\DATA\MJM-2-60\MYC-277 2021-12-29 08-53-19\012-0801.D  
Sample Name: MJM-55-2

=====  
Acq. Operator : Seq. Line : 8  
Acq. Instrument : Instrument 2 Location : Vial 12  
Injection Date : 12/29/2021 10:47:35 AM Inj : 1  
Inj Volume : 3.000 µl  
Acq. Method : D:\DATA\JIAOBING\DATA\MJM-2-60\MYC-277 2021-12-29 08-53-19\DAD-OD(1-6)-90-  
10-1.0ML-3UL-220NM-25MIN.M  
Last changed : 12/14/2021 9:39:25 AM  
Analysis Method : D:\METHOD\ZXH\DAD-OD(1-6)-80-20-0.5ML-3UL-220NM-10MIN.M  
Last changed : 1/7/2022 4:19:55 PM  
(modified after loading)  
Additional Info : Peak(s) manually integrated

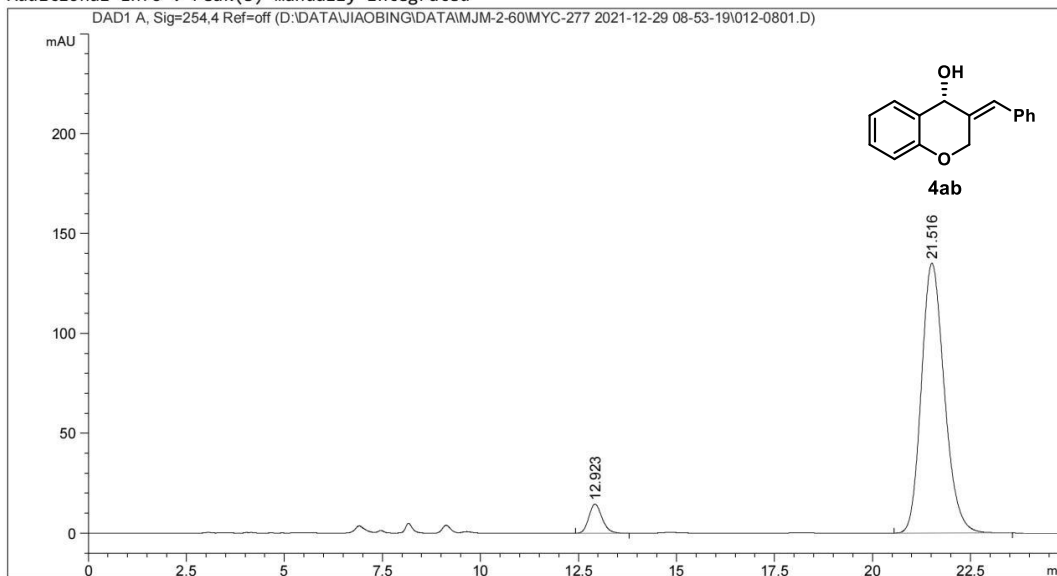

=====  
Area Percent Report  
=====

Sorted By : Signal  
Multiplier : 1.0000  
Dilution : 1.0000  
Use Multiplier & Dilution Factor with ISTDs

Signal 1: DAD1 A, Sig=254,4 Ref=off

| Peak # | RetTime [min] | Type | Width [min] | Area [mAU*s] | Height [mAU] | Area %  |
|--------|---------------|------|-------------|--------------|--------------|---------|
| 1      | 12.923        | BB   | 0.3578      | 342.42648    | 14.58962     | 5.8452  |
| 2      | 21.516        | BB   | 0.6283      | 5515.86035   | 135.11511    | 94.1548 |

Totals : 5858.28683 149.70473

Data File D:\DATA\JIAOBING\DATA\MJM-2-60\MYC-277 2021-12-28 08-44-39\041-2201.D  
Sample Name: MJM-55-1-RAC

=====  
Acq. Operator : Seq. Line : 22  
Acq. Instrument : Instrument 2 Location : Vial 41  
Injection Date : 12/28/2021 6:07:56 PM Inj : 1  
Inj Volume : 3.000 µl  
Acq. Method : D:\DATA\JIAOBING\DATA\MJM-2-60\MYC-277 2021-12-28 08-44-39\DAD-OD(1-6)-90-  
10-1.0ML-3UL-220NM-25MIN.M  
Last changed : 12/14/2021 9:39:25 AM  
Analysis Method : D:\METHOD\MYC\DAD-AD(1-2)-90-10-0.5ML-5UL-ALL-10MIN.M  
Last changed : 12/29/2021 12:43:13 PM  
(modified after loading)  
Additional Info : Peak(s) manually integrated

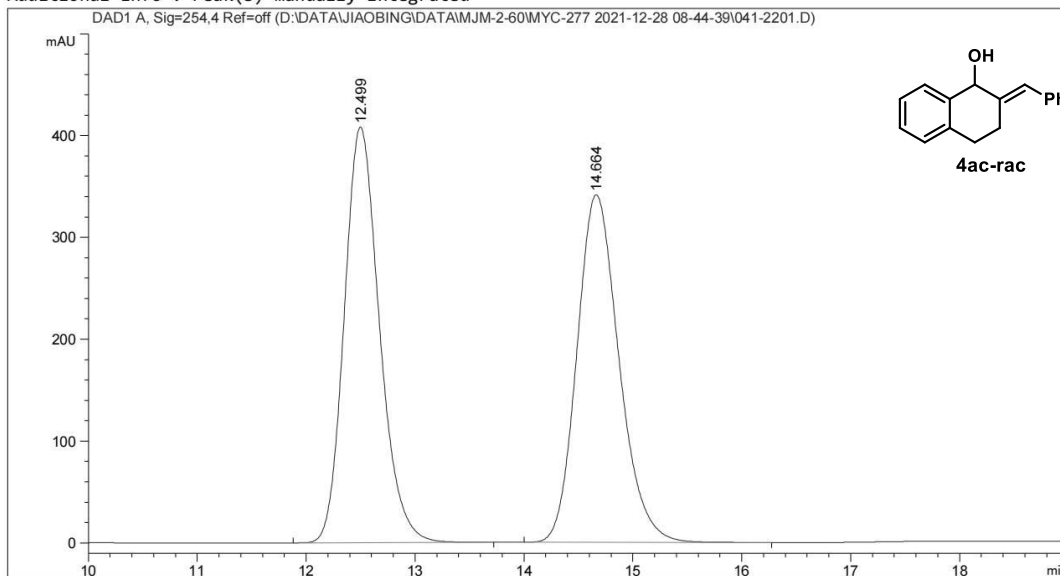

=====  
Area Percent Report  
=====

Sorted By : Signal  
Multiplier : 1.0000  
Dilution : 1.0000  
Use Multiplier & Dilution Factor with ISTDs

Signal 1: DAD1 A, Sig=254,4 Ref=off

| Peak # | RetTime [min] | Type | Width [min] | Area [mAU*s] | Height [mAU] | Area %  |
|--------|---------------|------|-------------|--------------|--------------|---------|
| 1      | 12.499        | BB   | 0.3459      | 9162.37012   | 408.19144    | 50.0285 |
| 2      | 14.664        | BB   | 0.4128      | 9151.92676   | 341.39313    | 49.9715 |

Totals : 1.83143e4 749.58456

Data File D:\DATA\JIAOBING\DATA\MJM-2-60\MYC-277 2021-12-28 08-44-39\042-2301.D  
Sample Name: MJM-55-1-RAC

=====  
Acq. Operator : Seq. Line : 23  
Acq. Instrument : Instrument 2 Location : Vial 42  
Injection Date : 12/28/2021 6:33:53 PM Inj : 1  
Inj Volume : 3.000 µl  
Acq. Method : D:\DATA\JIAOBING\DATA\MJM-2-60\MYC-277 2021-12-28 08-44-39\DAD-OD(1-6)-90-  
10-1.0ML-3UL-220NM-25MIN.M  
Last changed : 12/14/2021 9:39:25 AM  
Analysis Method : D:\METHOD\ZXH\DAD-OD(1-6)-80-20-0.5ML-3UL-220NM-10MIN.M  
Last changed : 1/7/2022 4:17:09 PM  
(modified after loading)  
Additional Info : Peak(s) manually integrated

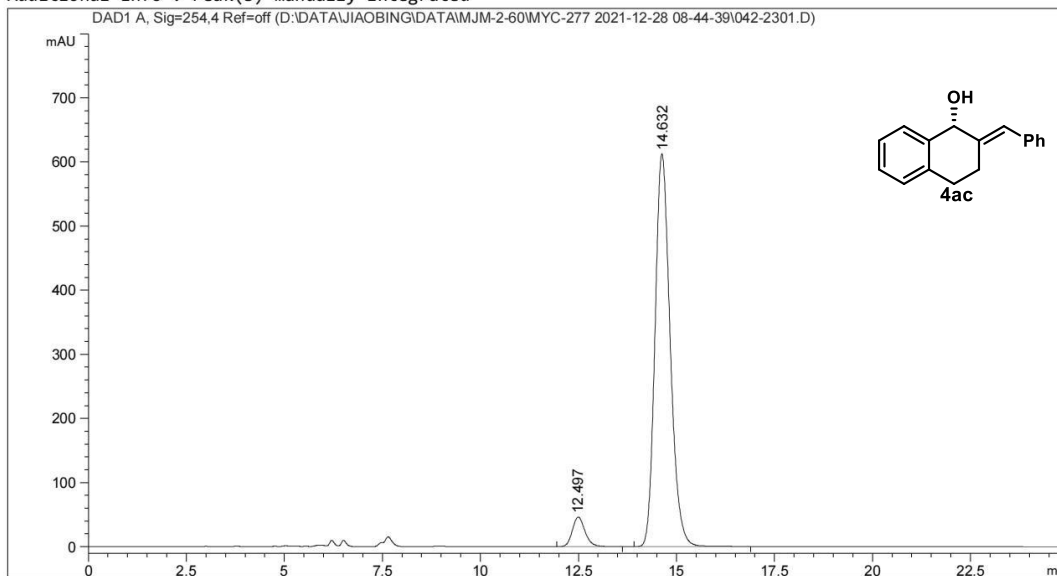

=====  
Area Percent Report  
=====

Sorted By : Signal  
Multiplier : 1.0000  
Dilution : 1.0000  
Use Multiplier & Dilution Factor with ISTDs

Signal 1: DAD1 A, Sig=254,4 Ref=off

| Peak # | RetTime [min] | Type | Width [min] | Area [mAU*s] | Height [mAU] | Area %  |
|--------|---------------|------|-------------|--------------|--------------|---------|
| 1      | 12.497        | BB   | 0.3436      | 1034.30835   | 46.11881     | 5.9165  |
| 2      | 14.632        | BB   | 0.4130      | 1.64474e4    | 612.99146    | 94.0835 |

Totals : 1.74817e4 659.11027

Data File D:\DATA\JIAOBING\DATA\MJM-2-60\MYC-277 2021-12-28 08-44-39\013-3501.D  
Sample Name: MJM-55-9-RAC

=====  
Acq. Operator : Seq. Line : 35  
Acq. Instrument : Instrument 2 Location : Vial 13  
Injection Date : 12/29/2021 12:21:01 AM Inj : 1  
Inj Volume : 2.000 µl  
Acq. Method : D:\DATA\JIAOBING\DATA\MJM-2-60\MYC-277 2021-12-28 08-44-39\DAD-AD(1-2)-95-5  
-1ML-2UL-ALL-60MIN.M  
Last changed : 12/10/2021 3:08:05 PM  
Analysis Method : D:\METHOD\MYC\DAD-AD(1-2)-90-10-0.5ML-5UL-ALL-10MIN.M  
Last changed : 12/29/2021 10:28:32 AM  
(modified after loading)

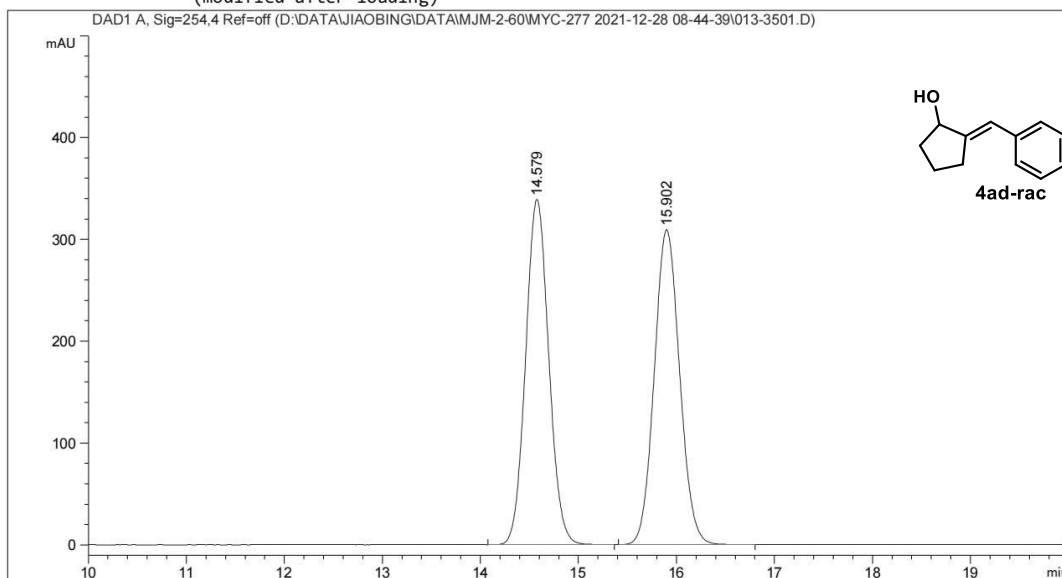

=====  
Area Percent Report  
=====

Sorted By : Signal  
Multiplier : 1.0000  
Dilution : 1.0000  
Use Multiplier & Dilution Factor with ISTDs

Signal 1: DAD1 A, Sig=254,4 Ref=off

| Peak # | RetTime [min] | Type | Width [min] | Area [mAU*s] | Height [mAU] | Area %  |
|--------|---------------|------|-------------|--------------|--------------|---------|
| 1      | 14.579        | BB   | 0.2552      | 5558.33301   | 339.12198    | 50.0054 |
| 2      | 15.902        | BB   | 0.2796      | 5557.12305   | 309.26376    | 49.9946 |

Totals : 1.11155e4 648.38574

Data File D:\DATA\JIAOBING\DATA\MJM-2-60\MYC-277 2021-12-29 08-53-19\014-0301.D  
Sample Name: MJM-55-9

=====  
Acq. Operator : Seq. Line : 3  
Acq. Instrument : Instrument 2 Location : Vial 14  
Injection Date : 12/29/2021 9:17:37 AM Inj : 1  
Inj Volume : 2.000 µl  
Acq. Method : D:\DATA\JIAOBING\DATA\MJM-2-60\MYC-277 2021-12-29 08-53-19\DAD-AD(1-2)-95-5  
-1ML-2UL-ALL-30MIN.M  
Last changed : 12/11/2021 10:00:45 AM  
Analysis Method : D:\METHOD\ZXH\DAD-OD(1-6)-80-20-0.5ML-3UL-220NM-10MIN.M  
Last changed : 1/7/2022 4:19:55 PM  
(modified after loading)  
Additional Info : Peak(s) manually integrated

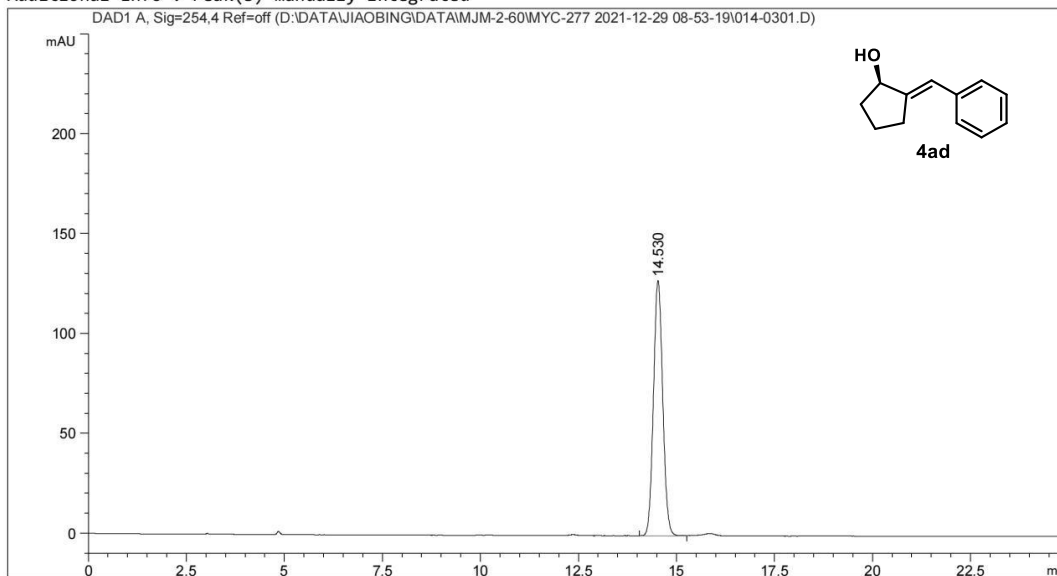

=====  
Area Percent Report  
=====

Sorted By : Signal  
Multiplier : 1.0000  
Dilution : 1.0000  
Use Multiplier & Dilution Factor with ISTDs

Signal 1: DAD1 A, Sig=254,4 Ref=off

| Peak # | RetTime [min] | Type | Width [min] | Area [mAU*s] | Height [mAU] | Area %   |
|--------|---------------|------|-------------|--------------|--------------|----------|
| 1      | 14.530        | BB   | 0.2558      | 2099.72510   | 127.75042    | 100.0000 |

Totals : 2099.72510 127.75042

Data File D:\DATA\JIAOBING\DATA\MJM-2-69\MYC-305 2022-01-05 16-54-25\052-1001.D  
 Sample Name: MJM-69-5-RAC

```

=====
Acq. Operator   :                               Seq. Line :   10
Acq. Instrument : Instrument 2                 Location  : Vial 52
Injection Date  : 1/5/2022 10:04:16 PM        Inj       :    1
                                           Inj Volume: 3.000 µl

Acq. Method    : D:\DATA\JIAOBING\DATA\MJM-2-69\MYC-305 2022-01-05 16-54-25\DAD-OD(1-6)-90-
                10-1.0ML-3UL-220NM-40MIN.M
Last changed   : 12/4/2021 11:30:53 AM
Analysis Method: D:\METHOD\LWD\DAD-AD(1-2)-95-5-1ML-3UL-ALL-10MIN.M
Last changed   : 1/6/2022 10:31:45 AM
                (modified after loading)
Additional Info : Peak(s) manually integrated
  
```

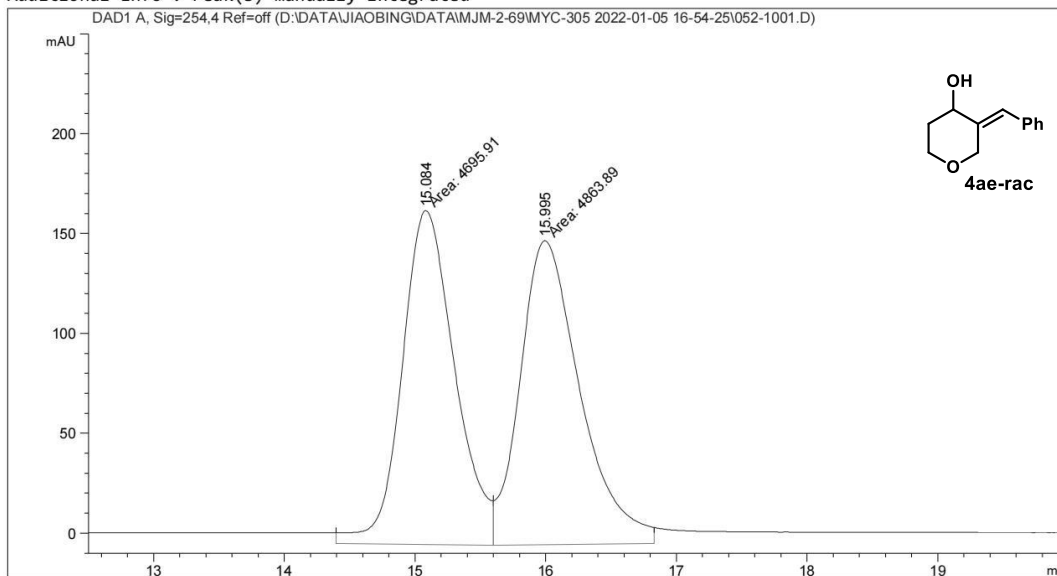

Area Percent Report

```

Sorted By      :      Signal
Multiplier     :      1.0000
Dilution       :      1.0000
Use Multiplier & Dilution Factor with ISTDs
  
```

Signal 1: DAD1 A, Sig=254,4 Ref=off

| Peak # | RetTime [min] | Type | Width [min] | Area [mAU*s] | Height [mAU] | Area %  |
|--------|---------------|------|-------------|--------------|--------------|---------|
| 1      | 15.084        | MM   | 0.4681      | 4695.90527   | 167.19333    | 49.1214 |
| 2      | 15.995        | MM   | 0.5323      | 4863.88525   | 152.29037    | 50.8786 |

Totals :                    9559.79053   319.48370

Data File D:\DATA\JIAOBING\DATA\MJM-2-70\MYC-304 2022-01-07 11-50-03\015-1201.D  
Sample Name: MJM-72-1

=====  
Acq. Operator : Seq. Line : 12  
Acq. Instrument : Instrument 2 Location : Vial 15  
Injection Date : 1/7/2022 3:32:52 PM Inj : 1  
Inj Volume : 3.000 µl  
Acq. Method : D:\DATA\JIAOBING\DATA\MJM-2-70\MYC-304 2022-01-07 11-50-03\015-1201.D  
10-1.0ML-3UL-220NM-25MIN.M  
Last changed : 12/14/2021 9:39:25 AM  
Analysis Method : D:\METHOD\ZXH\DAD-OD(1-6)-80-20-0.5ML-3UL-220NM-10MIN.M  
Last changed : 1/7/2022 4:07:54 PM  
(modified after loading)

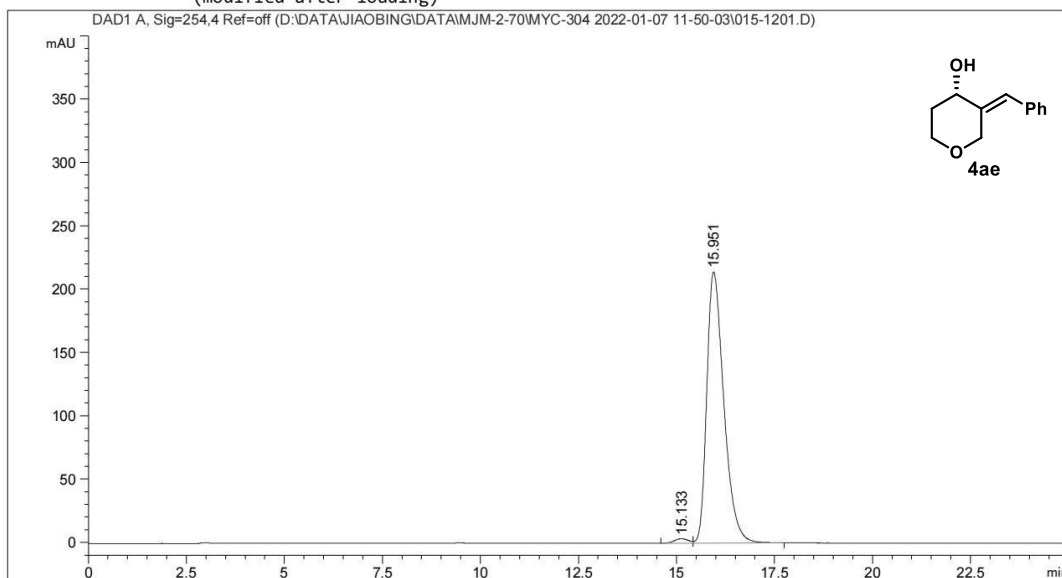

=====  
Area Percent Report  
=====

Sorted By : Signal  
Multiplier : 1.0000  
Dilution : 1.0000  
Use Multiplier & Dilution Factor with ISTDs

Signal 1: DAD1 A, Sig=254,4 Ref=off

| Peak # | RetTime [min] | Type | Width [min] | Area [mAU*s] | Height [mAU] | Area %  |
|--------|---------------|------|-------------|--------------|--------------|---------|
| 1      | 15.133        | BV   | 0.3366      | 84.86633     | 3.47929      | 1.2918  |
| 2      | 15.951        | VB   | 0.4614      | 6484.65576   | 214.06369    | 98.7082 |

Totals : 6569.52209 217.54298



```

=====
Acq. Operator   :                               Seq. Line :   18
Acq. Instrument : Instrument 2                 Location  : Vial 13
Injection Date  : 1/7/2022 5:38:53 PM        Inj       :    1
                                           Inj Volume: 3.000 µl

Acq. Method    : D:\DATA\JIAOBING\DATA\MJM-2-70\MYC-304 2022-01-07 11-50-03\DAD-OD(1-6)-90-
                10-0.5ML-3UL-220NM-40MIN.M
Last changed   : 1/7/2022 3:58:44 PM
Analysis Method : D:\METHOD\ZXH\DAD-OD(1-6)-80-20-0.5ML-3UL-220NM-10MIN.M
Last changed   : 1/7/2022 9:40:51 PM
                (modified after loading)
Additional Info : Peak(s) manually integrated
  
```

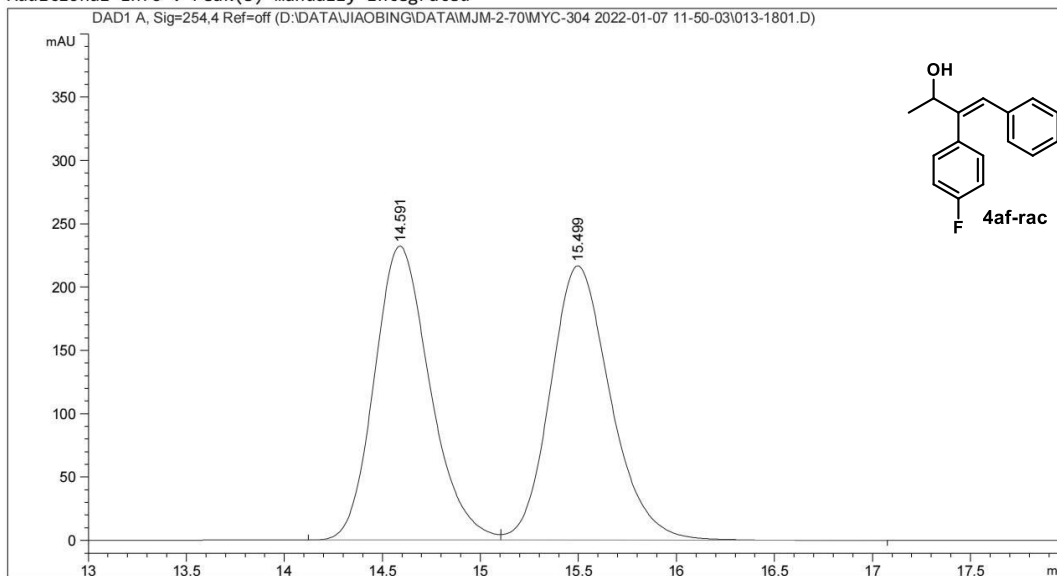

Area Percent Report

```

Sorted By      :      Signal
Multiplier     :      1.0000
Dilution       :      1.0000
Use Multiplier & Dilution Factor with ISTDs
  
```

Signal 1: DAD1 A, Sig=254,4 Ref=off

| Peak # | RetTime [min] | Type | Width [min] | Area [mAU*s] | Height [mAU] | Area %  |
|--------|---------------|------|-------------|--------------|--------------|---------|
| 1      | 14.591        | BV   | 0.3017      | 4568.65869   | 232.01660    | 49.7049 |
| 2      | 15.499        | VB   | 0.3270      | 4622.90088   | 216.63348    | 50.2951 |

Totals : 9191.55957 448.65009

Data File D:\DATA\JIAOBING\DATA\MJM-2-70\MYC-304 2022-01-07 11-50-03\014-1901.D  
Sample Name: MJM-71-2

=====  
Acq. Operator : Seq. Line : 19  
Acq. Instrument : Instrument 2 Location : Vial 14  
Injection Date : 1/7/2022 6:19:50 PM Inj : 1  
Inj Volume : 3.000 µl  
Acq. Method : D:\DATA\JIAOBING\DATA\MJM-2-70\MYC-304 2022-01-07 11-50-03\DAD-OD(1-6)-90-  
10-0.5ML-3UL-220NM-40MIN.M  
Last changed : 1/7/2022 6:34:09 PM  
(modified after loading)  
Analysis Method : D:\METHOD\ZXH\DAD-OD(1-6)-80-20-0.5ML-3UL-220NM-10MIN.M  
Last changed : 1/7/2022 9:48:19 PM  
(modified after loading)  
Additional Info : Peak(s) manually integrated

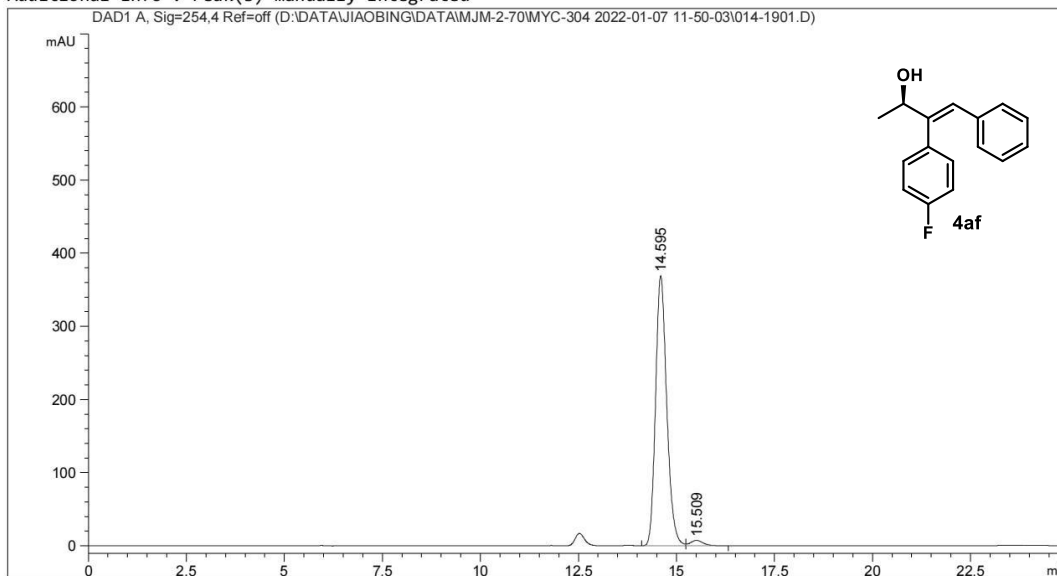

=====  
Area Percent Report  
=====

Sorted By : Signal  
Multiplier : 1.0000  
Dilution : 1.0000  
Use Multiplier & Dilution Factor with ISTDs

Signal 1: DAD1 A, Sig=254,4 Ref=off

| Peak # | RetTime [min] | Type | Width [min] | Area [mAU*s] | Height [mAU] | Area %  |
|--------|---------------|------|-------------|--------------|--------------|---------|
| 1      | 14.595        | BV   | 0.3037      | 7324.59912   | 368.86664    | 97.7628 |
| 2      | 15.509        | VB   | 0.3315      | 167.61787    | 7.42204      | 2.2372  |

Totals : 7492.21700 376.28868

Data File D:\DATA\MYC\MYC-320\MYC-320 2022-01-15 15-17-01\053-2001.D  
 Sample Name: MJM-2-74-RAC

```

=====
Acq. Operator   :                               Seq. Line :   20
Acq. Instrument : Instrument 2                   Location  : Vial 53
Injection Date  : 1/16/2022 1:27:32 AM         Inj       :    1
                                                Inj Volume: 3.000 µl

Acq. Method     : D:\DATA\MYC\MYC-320\MYC-320 2022-01-15 15-17-01\DAD-OD(1-6)-90-10-1.0ML-3UL
                  -220NM-40MIN.M
Last changed    : 12/4/2021 11:30:53 AM
Analysis Method : D:\METHOD\MYC\DAD-AD(1-2)-85-15-1.0ML-5UL-ALL-10MIN.M
Last changed    : 1/17/2022 10:15:58 AM
                  (modified after loading)
Additional Info  : Peak(s) manually integrated
  
```

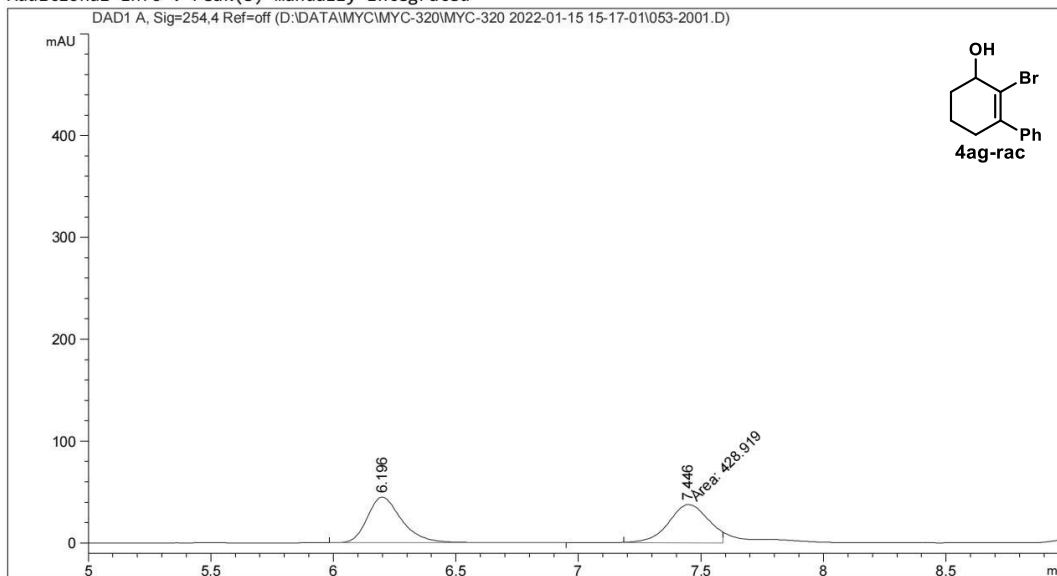

Area Percent Report

```

Sorted By      :      Signal
Multiplier     :      1.0000
Dilution       :      1.0000
Use Multiplier & Dilution Factor with ISTDs
  
```

Signal 1: DAD1 A, Sig=254,4 Ref=off

| Peak # | RetTime [min] | Type | Width [min] | Area [mAU*s] | Height [mAU] | Area %  |
|--------|---------------|------|-------------|--------------|--------------|---------|
| 1      | 6.196         | BB   | 0.1482      | 439.48764    | 44.88778     | 50.6085 |
| 2      | 7.446         | MM   | 0.1896      | 428.91882    | 37.70900     | 49.3915 |

Totals :                                    868.40646    82.59678

Data File D:\DATA\MYC\MYC-319\MYC-319 2022-01-17 08-46-31\051-2301.D  
 Sample Name: MJM-2-74-4

```

=====
Acq. Operator   :                               Seq. Line :   23
Acq. Instrument : Instrument 2                   Location  : Vial 51
Injection Date  : 1/17/2022 5:41:12 PM         Inj       :    1
                                                    Inj Volume: 3.000 µl

Acq. Method     : D:\DATA\MYC\MYC-319\MYC-319 2022-01-17 08-46-31\DAD-OD(1-6)-90-10-1.0ML-3UL
                  -220NM-30MIN.M
Last changed    : 12/3/2021 2:45:21 PM
Analysis Method : D:\METHOD\MYC\DAD-OD(1-6)-95-5-1.0ML-5UL-ALL-70MIN.M
Last changed    : 1/17/2022 7:34:36 PM
                  (modified after loading)
Additional Info  : Peak(s) manually integrated
  
```

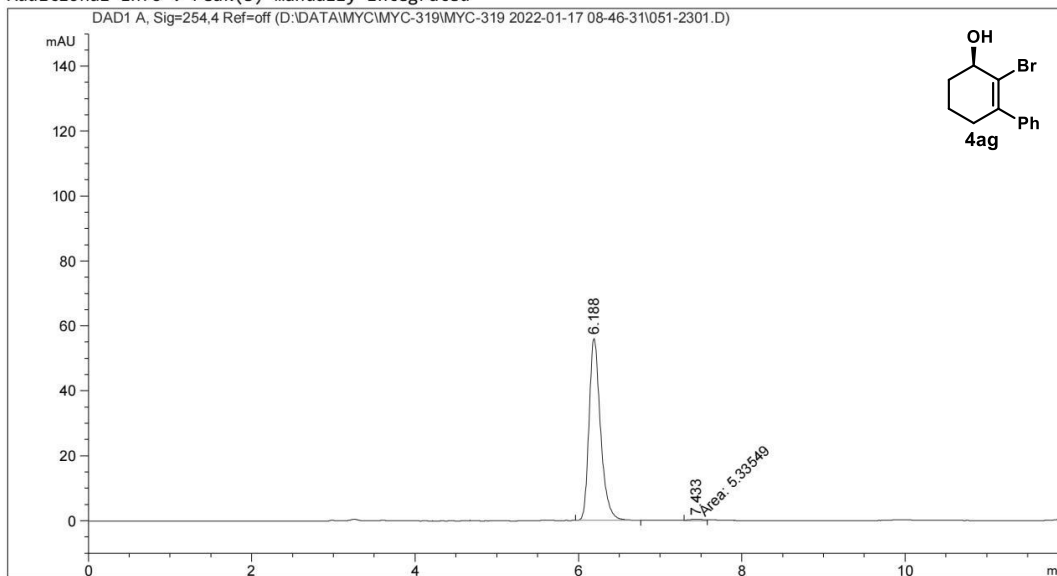

=====  
 Area Percent Report  
 =====

```

Sorted By      :      Signal
Multiplier     :      1.0000
Dilution       :      1.0000
Use Multiplier & Dilution Factor with ISTDs
  
```

Signal 1: DAD1 A, Sig=254,4 Ref=off

| Peak # | RetTime [min] | Type | Width [min] | Area [mAU*s] | Height [mAU] | Area %  |
|--------|---------------|------|-------------|--------------|--------------|---------|
| 1      | 6.188         | BB   | 0.1459      | 547.10388    | 56.05243     | 99.0342 |
| 2      | 7.433         | MM   | 0.2034      | 5.33549      | 4.37186e-1   | 0.9658  |

Totals :                                    552.43937    56.48962

=====  
Acq. Operator : Seq. Line : 8  
Acq. Instrument : Instrument 2 Location : Vial 32  
Injection Date : 12/28/2021 11:04:02 AM Inj : 1  
Inj Volume : 2.000 µl  
Acq. Method : D:\DATA\JIAOBING\DATA\MJM-2-60\MYC-277 2021-12-28 08-44-39\DAD-AD(1-2)-95-5  
-1ML-2UL-ALL-60MIN.M  
Last changed : 12/10/2021 3:08:05 PM  
Analysis Method : D:\METHOD\MYC\DAD-OJ(1-6)-90-10-1.0ML-5UL-ALL-70MIN.M  
Last changed : 1/14/2022 9:03:08 PM  
(modified after loading)  
Additional Info : Peak(s) manually integrated

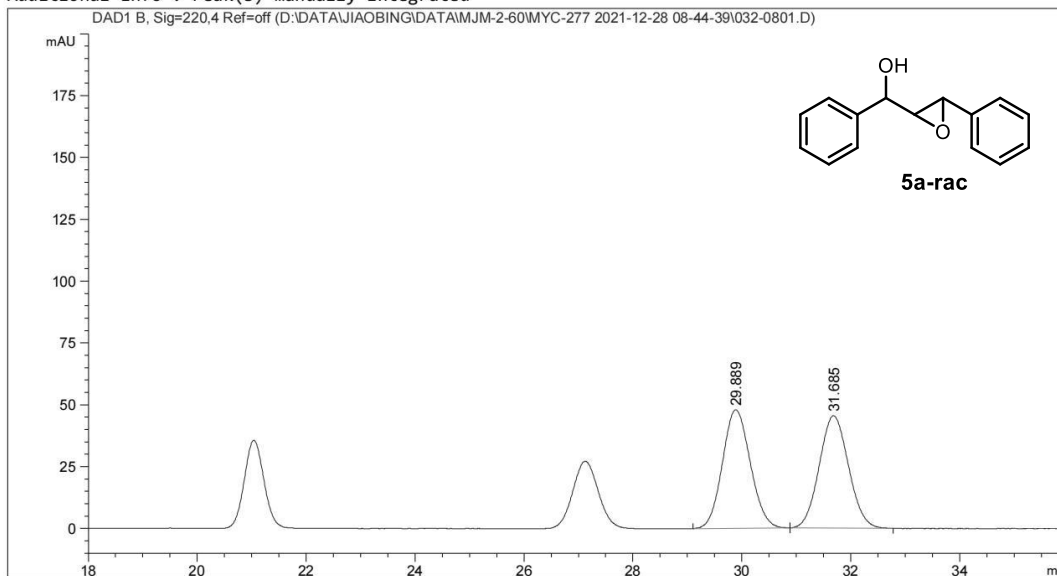

=====  
Area Percent Report  
=====

Sorted By : Signal  
Multiplier : 1.0000  
Dilution : 1.0000  
Use Multiplier & Dilution Factor with ISTDs

Signal 1: DAD1 B, Sig=220,4 Ref=off

| Peak # | RetTime [min] | Type | Width [min] | Area [mAU*s] | Height [mAU] | Area %  |
|--------|---------------|------|-------------|--------------|--------------|---------|
| 1      | 29.889        | BB   | 0.5392      | 1704.77136   | 47.90083     | 50.0656 |
| 2      | 31.685        | BB   | 0.5728      | 1700.30469   | 45.41810     | 49.9344 |

Totals : 3405.07605 93.31893

=====  
Acq. Operator : Seq. Line : 9  
Acq. Instrument : Instrument 2 Location : Vial 34  
Injection Date : 12/28/2021 12:04:59 PM Inj : 1  
Inj Volume : 2.000 µl  
Acq. Method : D:\DATA\JIAOBING\DATA\MJM-2-60\MYC-277 2021-12-28 08-44-39\DAD-AD(1-2)-95-5  
-1ML-2UL-ALL-60MIN.M  
Last changed : 12/10/2021 3:08:05 PM  
Analysis Method : D:\METHOD\MYC\DAD-OJ(1-6)-90-10-1.0ML-5UL-ALL-70MIN.M  
Last changed : 1/14/2022 9:06:07 PM  
(modified after loading)  
Additional Info : Peak(s) manually integrated

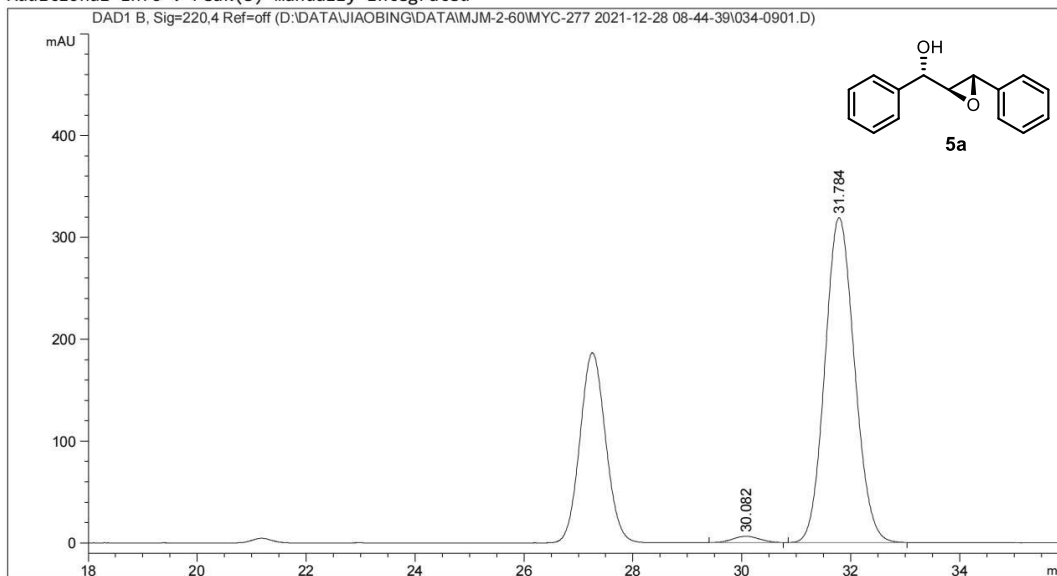

=====  
Area Percent Report  
=====

Sorted By : Signal  
Multiplier : 1.0000  
Dilution : 1.0000  
Use Multiplier & Dilution Factor with ISTDs

Signal 1: DAD1 B, Sig=220,4 Ref=off

| Peak # | RetTime [min] | Type | Width [min] | Area [mAU*s] | Height [mAU] | Area %  |
|--------|---------------|------|-------------|--------------|--------------|---------|
| 1      | 30.082        | BB   | 0.4186      | 217.02499    | 6.35182      | 1.7674  |
| 2      | 31.784        | BB   | 0.5850      | 1.20626e4    | 319.12558    | 98.2326 |

Totals : 1.22796e4 325.47740

=====  
Acq. Operator : Seq. Line : 8  
Acq. Instrument : Instrument 2 Location : Vial 32  
Injection Date : 12/28/2021 11:04:02 AM Inj : 1  
Inj Volume : 2.000 µl  
Acq. Method : D:\DATA\JIAOBING\DATA\MJM-2-60\MYC-277 2021-12-28 08-44-39\DAD-AD(1-2)-95-5  
-1ML-2UL-ALL-60MIN.M  
Last changed : 12/10/2021 3:08:05 PM  
Analysis Method : D:\METHOD\MYC\DAD-OJ(1-6)-90-10-1.0ML-5UL-ALL-70MIN.M  
Last changed : 1/14/2022 9:03:08 PM  
(modified after loading)  
Additional Info : Peak(s) manually integrated

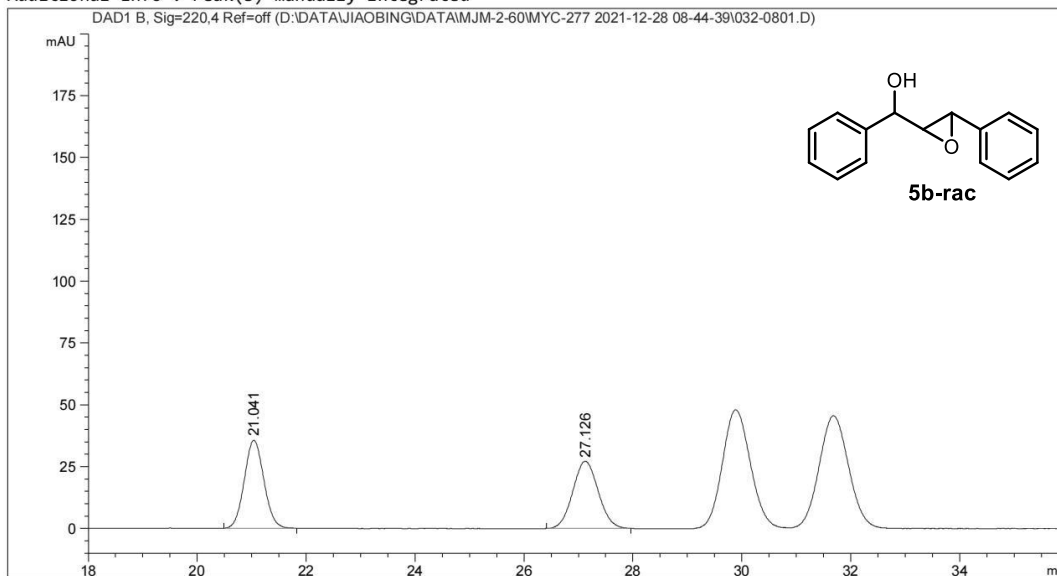

=====  
Area Percent Report  
=====

Sorted By : Signal  
Multiplier : 1.0000  
Dilution : 1.0000  
Use Multiplier & Dilution Factor with ISTDs

Signal 1: DAD1 B, Sig=220,4 Ref=off

| Peak # | RetTime [min] | Type | Width [min] | Area [mAU*s] | Height [mAU] | Area %  |
|--------|---------------|------|-------------|--------------|--------------|---------|
| 1      | 21.041        | BB   | 0.3856      | 888.44031    | 35.54108     | 50.1501 |
| 2      | 27.126        | BB   | 0.4848      | 883.12042    | 27.20190     | 49.8499 |

Totals : 1771.56073 62.74298

=====  
Acq. Operator : Seq. Line : 9  
Acq. Instrument : Instrument 2 Location : Vial 34  
Injection Date : 12/28/2021 12:04:59 PM Inj : 1  
Inj Volume : 2.000 µl  
Acq. Method : D:\DATA\JIAOBING\DATA\MJM-2-60\MYC-277 2021-12-28 08-44-39\DAD-AD(1-2)-95-5  
-1ML-2UL-ALL-60MIN.M  
Last changed : 12/10/2021 3:08:05 PM  
Analysis Method : D:\METHOD\MYC\DAD-OJ(1-6)-90-10-1.0ML-5UL-ALL-70MIN.M  
Last changed : 1/14/2022 9:06:07 PM  
(modified after loading)  
Additional Info : Peak(s) manually integrated

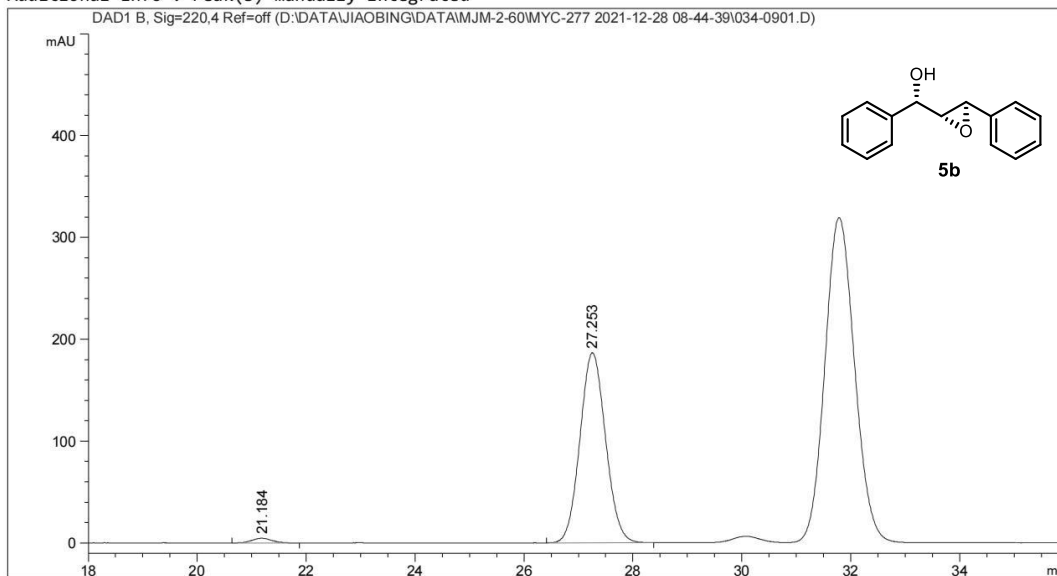

=====  
Area Percent Report  
=====

Sorted By : Signal  
Multiplier : 1.0000  
Dilution : 1.0000  
Use Multiplier & Dilution Factor with ISTDs

Signal 1: DAD1 B, Sig=220,4 Ref=off

| Peak # | RetTime [min] | Type | Width [min] | Area [mAU*s] | Height [mAU] | Area %  |
|--------|---------------|------|-------------|--------------|--------------|---------|
| 1      | 21.184        | BB   | 0.3170      | 121.54846    | 4.64967      | 1.9535  |
| 2      | 27.253        | BB   | 0.5075      | 6100.59229   | 186.58453    | 98.0465 |

Totals : 6222.14075 191.23420



Data File D:\DATA\JIAOBING\DATA\MJM-2-70\MYC-304 2022-01-07 11-50-03\011-0301.D  
Sample Name: MJM-70-RAC

=====  
Acq. Operator : Seq. Line : 3  
Acq. Instrument : Instrument 2 Location : Vial 11  
Injection Date : 1/7/2022 12:13:44 PM Inj : 1  
Inj Volume : 2.000 µl  
Acq. Method : D:\DATA\JIAOBING\DATA\MJM-2-70\MYC-304 2022-01-07 11-50-03\DAD-AD(1-2)-95-5  
-1ML-2UL-ALL-30MIN.M  
Last changed : 12/11/2021 10:00:45 AM  
Analysis Method : D:\METHOD\ZXH\DAD-OD(1-6)-80-20-0.5ML-3UL-220NM-10MIN.M  
Last changed : 1/7/2022 4:10:50 PM  
(modified after loading)  
Additional Info : Peak(s) manually integrated

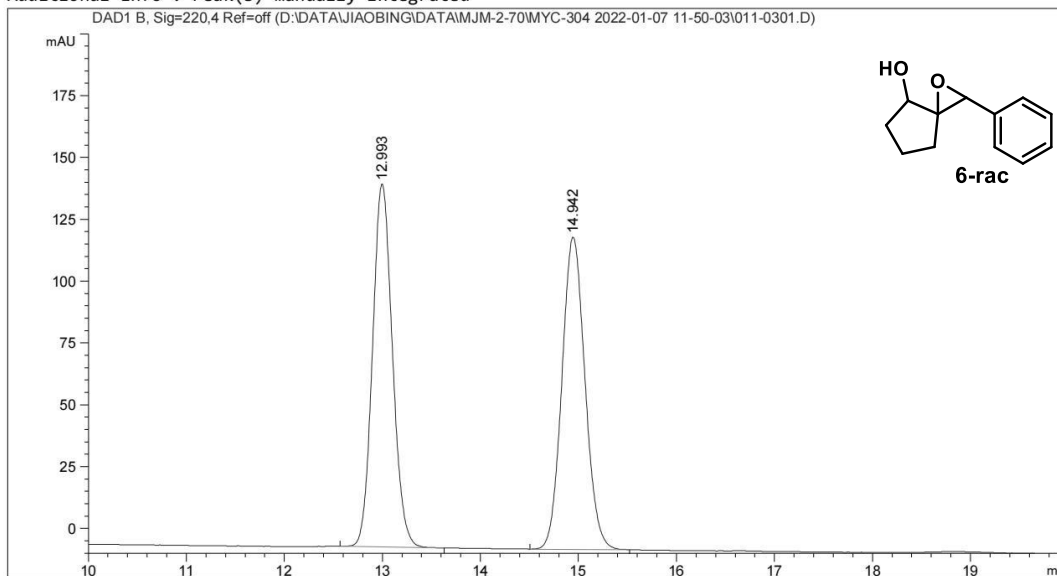

=====  
Area Percent Report  
=====

Sorted By : Signal  
Multiplier : 1.0000  
Dilution : 1.0000  
Use Multiplier & Dilution Factor with ISTDs

Signal 1: DAD1 B, Sig=220,4 Ref=off

| Peak # | RetTime [min] | Type | Width [min] | Area [mAU*s] | Height [mAU] | Area %  |
|--------|---------------|------|-------------|--------------|--------------|---------|
| 1      | 12.993        | BB   | 0.2182      | 2065.73169   | 146.76743    | 49.9989 |
| 2      | 14.942        | BB   | 0.2529      | 2065.82251   | 126.26190    | 50.0011 |

Totals : 4131.55420 273.02933

Data File D:\DATA\JIAOBING\DATA\MJM-2-70\MYC-304 2022-01-07 11-50-03\012-0401.D  
Sample Name: MJM-70

=====  
Acq. Operator : Seq. Line : 4  
Acq. Instrument : Instrument 2 Location : Vial 12  
Injection Date : 1/7/2022 12:44:40 PM Inj : 1  
Inj Volume : 2.000 µl  
Acq. Method : D:\DATA\JIAOBING\DATA\MJM-2-70\MYC-304 2022-01-07 11-50-03\DAD-AD(1-2)-95-5  
-1ML-2UL-ALL-30MIN.M  
Last changed : 12/11/2021 10:00:45 AM  
Analysis Method : D:\METHOD\ZXH\DAD-OD(1-6)-80-20-0.5ML-3UL-220NM-10MIN.M  
Last changed : 1/7/2022 4:10:50 PM  
(modified after loading)  
Additional Info : Peak(s) manually integrated

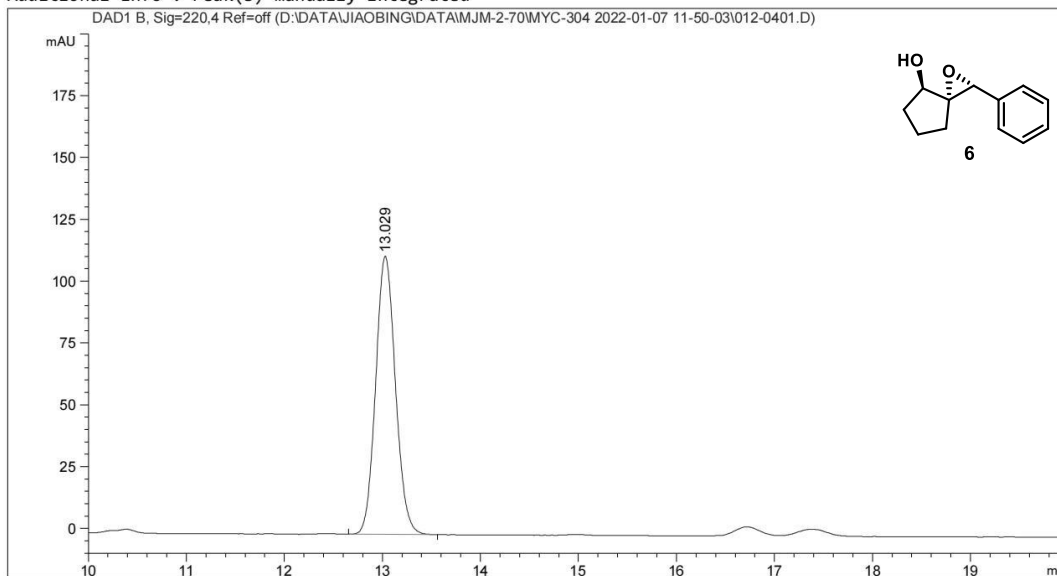

=====  
Area Percent Report  
=====

Sorted By : Signal  
Multiplier : 1.0000  
Dilution : 1.0000  
Use Multiplier & Dilution Factor with ISTDs

Signal 1: DAD1 B, Sig=220,4 Ref=off

| Peak # | RetTime [min] | Type | Width [min] | Area [mAU*s] | Height [mAU] | Area %   |
|--------|---------------|------|-------------|--------------|--------------|----------|
| 1      | 13.029        | BB   | 0.2176      | 1579.12024   | 112.62241    | 100.0000 |

Totals : 1579.12024 112.62241

```

=====
Acq. Operator   :                               Seq. Line :    3
Acq. Instrument : Instrument 2                 Location  : Vial 31
Injection Date  : 12/28/2021 9:08:49 AM      Inj       :    1
                                           Inj Volume: 2.000 µl

Acq. Method     : D:\DATA\JIAOBING\DATA\MJM-2-60\MYC-277 2021-12-28 08-44-39\
                  DAD-AD(1-2)-95-5
                  -1ML-2UL-ALL-30MIN.M
Last changed    : 12/11/2021 10:00:45 AM
Analysis Method : D:\METHOD\ZXH\DAD-OD(1-6)-95-5-0.5ML-2UL-220NM-40MIN.M
Last changed    : 12/28/2021 11:34:41 AM
                  (modified after loading)
Additional Info  : Peak(s) manually integrated
  
```

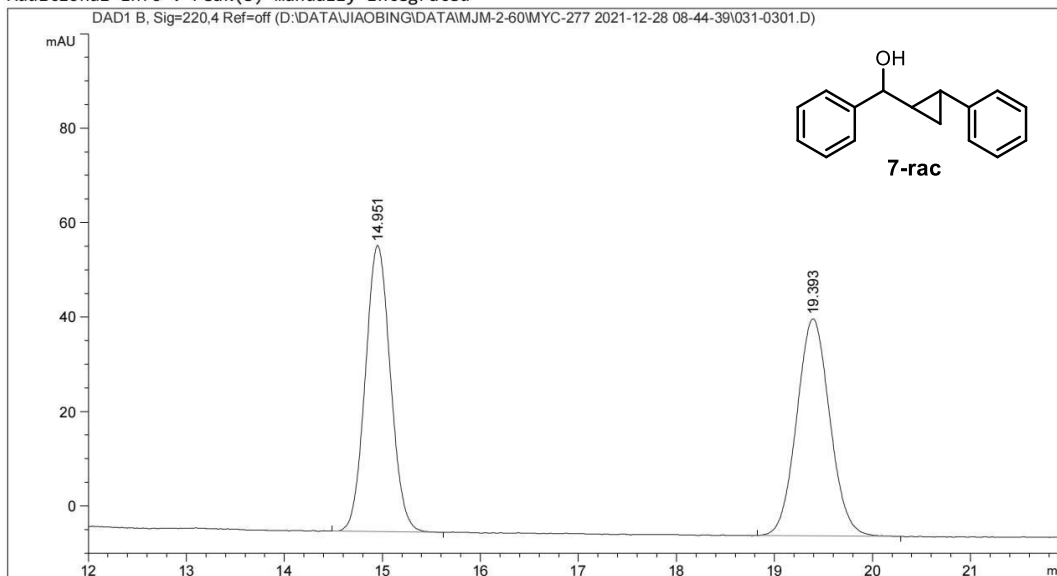

=====  
 Area Percent Report  
 =====

```

Sorted By      :      Signal
Multiplier     :      1.0000
Dilution       :      1.0000
Use Multiplier & Dilution Factor with ISTDs
  
```

Signal 1: DAD1 B, Sig=220,4 Ref=off

| Peak # | RetTime [min] | Type | Width [min] | Area [mAU*s] | Height [mAU] | Area %  |
|--------|---------------|------|-------------|--------------|--------------|---------|
| 1      | 14.951        | BB   | 0.2756      | 1078.75049   | 60.63454     | 49.9701 |
| 2      | 19.393        | BB   | 0.3660      | 1080.04211   | 45.98788     | 50.0299 |

Totals :                    2158.79260   106.62243

Data File D:\DATA\JIAOBING\DATA\MJM-2-60\MYC-277 2021-12-28 08-44-39\033-0701.D  
Sample Name: MJM-61

=====  
Acq. Operator : Seq. Line : 7  
Acq. Instrument : Instrument 2 Location : Vial 33  
Injection Date : 12/28/2021 10:33:03 AM Inj : 1  
Inj Volume : 2.000 µl  
Acq. Method : D:\DATA\JIAOBING\DATA\MJM-2-60\MYC-277 2021-12-28 08-44-39\DAD-AD(1-2)-95-5  
-1ML-2UL-ALL-30MIN.M  
Last changed : 12/11/2021 10:00:45 AM  
Analysis Method : D:\METHOD\ZXH\DAD-OD(1-6)-95-5-0.5ML-2UL-220NM-40MIN.M  
Last changed : 12/28/2021 11:32:24 AM  
(modified after loading)  
Additional Info : Peak(s) manually integrated

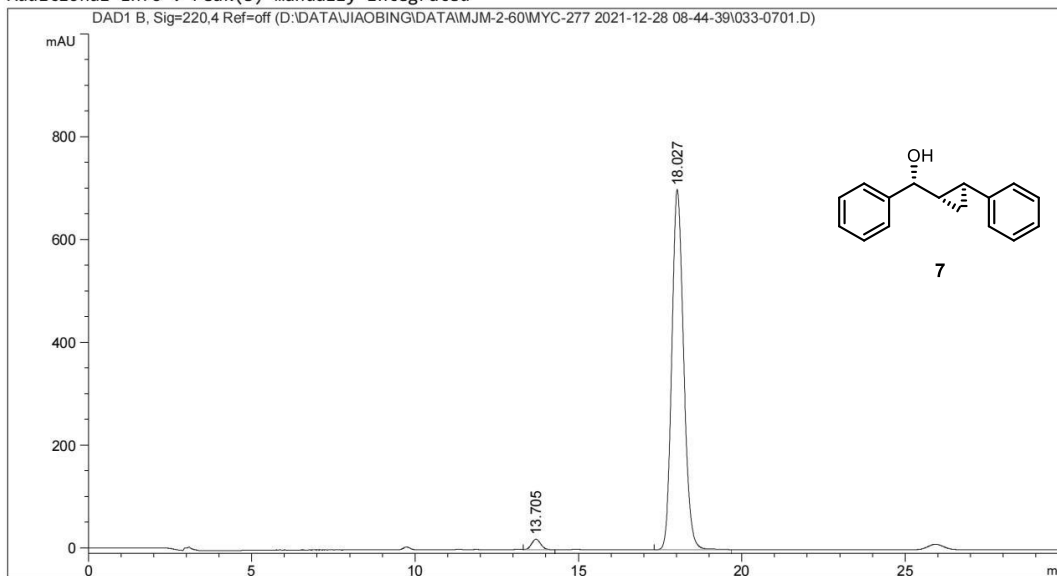

=====  
Area Percent Report  
=====

Sorted By : Signal  
Multiplier : 1.0000  
Dilution : 1.0000  
Use Multiplier & Dilution Factor with ISTDs

Signal 1: DAD1 B, Sig=220,4 Ref=off

| Peak # | RetTime [min] | Type | Width [min] | Area [mAU*s] | Height [mAU] | Area %  |
|--------|---------------|------|-------------|--------------|--------------|---------|
| 1      | 13.705        | BB   | 0.2981      | 393.07919    | 20.46746     | 2.1824  |
| 2      | 18.027        | BB   | 0.3894      | 1.76181e4    | 700.61224    | 97.8176 |

Totals : 1.80112e4 721.07971

## VII. Reference

1. (a) Dola VR.; Soni A.; Agarwal P.; Ahmad H.; Raju KSR.; Rashid M.; Wahajuddin M.; Srivastava K.; Haq W.; Dwivedi A.; Puri S.; Katti S., **2017**. *Antimicrob Agents Chemother* 61: e01152-16, <https://doi.org/10.1128/AAC.01152-16>.; (b) Das D.; Mal R.; Mittal N.; Zhu Z.; Emge T.; Seidel D., Beilstein J. *Org. Chem.* **2018**, 14, 2002-2011.
2. Nie, H.; Zhou, G.; Wang, Q.; Chen, W.; Zhang, S., *Tetrahedron: Asymmetry*. **2013**, 24, 1567-1571.
3. Blicke F.; Doorenbos N., *Journal of the American Chemical Society*, **1954**, vol. 76, p. 2317,2318.
4. Zhou M.; Liu T.; Cao M.; Xue Z.; Lv H.; Zhang X., *Org. Lett.* **2014**, 16, 3484–3487
5. Zygalski L.; Middel C.; Harms K.; Koert U., *Org. Lett.* **2018**, 20, 5071–5074
6. Li J.; Zhu Y.; Lu Y.; Wang Y.; Liu Y.; Liu D.; Zhang W., *Organometallics* **2019**, 38, 3970–3978
